# Supplementary material for: Reporting of drug trial funding sources and author financial conflicts of interest in Cochrane and non-Cochrane meta-analyses: a cross-sectional study
Source: PubMed Central journal article supplement — BMJ Open. 2020 May 11;10(5):e035633. doi: 10.1136/bmjopen-2019-035633 (PMC7229983; doi:10.1136/bmjopen-2019-035633), 2020-05-11
Supplement: bmjopen-2019-035633.draft_revisions.pdf [file bmjopen-2019-035633.draft_revisions.pdf]

# BMJ Open

BMJ Open is committed to open peer review. As part of this commitment we make the peer review history of every article we publish publicly available.

When an article is published we post the peer reviewers' comments and the authors' responses online. We also post the versions of the paper that were used during peer review. These are the versions that the peer review comments apply to.

The versions of the paper that follow are the versions that were submitted during the peer review process. They are not the versions of record or the final published versions. They should not be cited or distributed as the published version of this manuscript.

BMJ Open is an open access journal and the full, final, typeset and author-corrected version of record of the manuscript is available on our site with no access controls, subscription charges or pay-per-view fees (<http://bmjopen.bmj.com>).

If you have any questions on BMJ Open's open peer review process please email [info.bmjopen@bmj.com](mailto:info.bmjopen@bmj.com)

# BMJ Open

## Reporting of Drug Trial Funding Sources and Author Financial Conflicts of Interest in Cochrane and non-Cochrane Meta-analyses: A Cross-sectional Study

|                               |                                                                                                                                                                                                                                                                                                                                                                                                                                                                                                                                                                                                                                                                                                                                                                                                        |
|-------------------------------|--------------------------------------------------------------------------------------------------------------------------------------------------------------------------------------------------------------------------------------------------------------------------------------------------------------------------------------------------------------------------------------------------------------------------------------------------------------------------------------------------------------------------------------------------------------------------------------------------------------------------------------------------------------------------------------------------------------------------------------------------------------------------------------------------------|
| Journal:                      | <i>BMJ Open</i>                                                                                                                                                                                                                                                                                                                                                                                                                                                                                                                                                                                                                                                                                                                                                                                        |
| Manuscript ID                 | bmjopen-2019-035633                                                                                                                                                                                                                                                                                                                                                                                                                                                                                                                                                                                                                                                                                                                                                                                    |
| Article Type:                 | Original research                                                                                                                                                                                                                                                                                                                                                                                                                                                                                                                                                                                                                                                                                                                                                                                      |
| Date Submitted by the Author: | 08-Nov-2019                                                                                                                                                                                                                                                                                                                                                                                                                                                                                                                                                                                                                                                                                                                                                                                            |
| Complete List of Authors:     | Turner, Kimberly; Jewish General Hospital and McGill University<br>Carboni-Jiménez, Andrea; McGill University<br>Benea, Carla; Jewish General Hospital<br>Elder, Katharine; Jewish General Hospital<br>Levis, Brooke; McGill University, Epidemiology, Biostatistics and Occupational Health<br>Boruff, Jill; McGill University, Schulich Library of Physical Sciences, Life Sciences, and Engineering<br>Roseman, Michelle; McGill University<br>Bero, Lisa; University of Sydney, Charles Perkins Centre / Pharmacy<br>Lexchin, Joel; York University, School of Health Policy and Management<br>Turner, Erick; Portland VA Medical Center, ; Oregon Health & Science University, Psychiatry<br>Benedetti, Andrea; McGill University<br>Thombs, Brett; Jewish General Hospital and McGill University |
| Keywords:                     | EPIDEMIOLOGY, STATISTICS & RESEARCH METHODS, MEDICAL ETHICS                                                                                                                                                                                                                                                                                                                                                                                                                                                                                                                                                                                                                                                                                                                                            |
|                               |                                                                                                                                                                                                                                                                                                                                                                                                                                                                                                                                                                                                                                                                                                                                                                                                        |

SCHOLARONE™  
Manuscripts

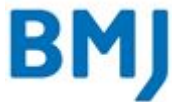

I, the Submitting Author has the right to grant and does grant on behalf of all authors of the Work (as defined in the below author licence), an exclusive licence and/or a non-exclusive licence for contributions from authors who are: i) UK Crown employees; ii) where BMJ has agreed a CC-BY licence shall apply, and/or iii) in accordance with the terms applicable for US Federal Government officers or employees acting as part of their official duties; on a worldwide, perpetual, irrevocable, royalty-free basis to BMJ Publishing Group Ltd ("BMJ") its licensees and where the relevant Journal is co-owned by BMJ to the co-owners of the Journal, to publish the Work in this journal and any other BMJ products and to exploit all rights, as set out in our [licence](#).

The Submitting Author accepts and understands that any supply made under these terms is made by BMJ to the Submitting Author unless you are acting as an employee on behalf of your employer or a postgraduate student of an affiliated institution which is paying any applicable article publishing charge ("APC") for Open Access articles. Where the Submitting Author wishes to make the Work available on an Open Access basis (and intends to pay the relevant APC), the terms of reuse of such Open Access shall be governed by a Creative Commons licence – details of these licences and which [Creative Commons](#) licence will apply to this Work are set out in our licence referred to above.

Other than as permitted in any relevant BMJ Author's Self Archiving Policies, I confirm this Work has not been accepted for publication elsewhere, is not being considered for publication elsewhere and does not duplicate material already published. I confirm all authors consent to publication of this Work and authorise the granting of this licence.

1  
2  
3 **1 Reporting of Drug Trial Funding Sources and Author Financial Conflicts of Interest in**  
4  
5 **2 Cochrane and non-Cochrane Meta-analyses: A Cross-sectional Study**  
6  
7  
8  
9

10 Kimberly A Turner, Andrea Carboni-Jiménez, Carla Benea, Katharine  
11  
12 Elder, Brooke Levis, Jill Boruff, Michelle Roseman, Lisa A Bero,  
13  
14 Joel Lexchin, Erick H Turner, Andrea Benedetti, Brett D Thombs  
15  
16  
17  
18

19 **8 Affiliations:**  
20

21 9 Lady Davis Institute for Medical Research, Jewish General Hospital and McGill University,  
22  
23 Montreal, Quebec, Canada  
24

25  
26 11 Kimberly A Turner (masters student)  
27

28 12 Andrea Carboni-Jiménez (research assistant)  
29

30 13 Carla Benea (undergraduate student)  
31

32 14 Katharine Elder (research assistant)  
33  
34

35 15 Brooke Levis (doctoral student)  
36

37 16 Brett D Thombs (professor)  
38  
39  
40  
41

42 18 Schulich Library of Physical Sciences, Life Sciences, and Engineering, McGill University,  
43  
44 Montreal, Quebec, Canada  
45

46 20 Jill Boruff (associate librarian)  
47  
48  
49  
50

51 22 Kingsway Medical Centre Family Health Organization, Toronto,  
52  
53 Ontario, Canada  
54  
55  
56  
57

1  
2  
3 24 Michelle Roseman (family physician)  
4

5 25  
6

7  
8 26 Charles Perkins Centre, and Faculty of Medicine and Health, and School of Pharmacy, The  
9

10 27 University of Sydney, Sydney, Australia  
11

12 28 Lisa A Bero (professor)  
13

14 29  
15

16  
17 30 School of Health Policy and Management, Faculty of Health, York University, Toronto, Ontario,  
18

19 31 Canada  
20

21 32 Joel Lexchin (professor emeritus)  
22

23 33  
24

25  
26 34 Department of Psychiatry and Department of Pharmacology, Oregon Health and Science  
27

28 35 University, Portland, Oregon, USA  
29

30  
31 36 Erick H Turner (associate professor)  
32

33 37  
34

35 38 Department of Epidemiology, Biostatistics and Occupational Health, McGill University,  
36

37 39 Montreal, Quebec, Canada  
38

39  
40 40 Andrea Benedetti (associate professor)  
41

42 41  
43

44 42 **Correspondence to:** Brett D. Thombs, PhD; Jewish General Hospital; 4333 Cote Ste. Catherine  
45

46 43 Road; Montreal, Quebec, Canada H3T 1E4; Tel (514) 340-8222 ext. 25112; E-mail:  
47

48  
49 44 brett.thombs@mcgill.ca; ORCID: 0000-0002-5644-8432  
50

51 45  
52

53 46 **Word count:** 4,048  
54  
55

1  
2  
3 47 **ABSTRACT**  
4

5 48 **Objective:** To (1) investigate the extent to which recently published meta-analyses report trial  
6  
7 49 funding, author-industry financial ties, and author-industry employment from included RCTs,  
8  
9 50 comparing Cochrane and non-Cochrane meta-analyses; (2) examine characteristics of meta-  
10  
11 51 analyses independently associated with reporting funding sources of included RCTs; and (3)  
12  
13 52 compare reporting among recently published Cochrane meta-analyses to Cochrane reviews  
14  
15 53 published in 2010.  
16  
17  
18

19 54 **Design:** Review of consecutive sample of recently published meta-analyses.  
20

21 55 **Data sources:** MEDLINE database via PubMed searched on October 19, 2018.  
22

23 56 **Eligibility criteria for selecting articles:** We selected the 250 most recent meta-analyses listed  
24  
25 57 in PubMed that included a documented search of at least one database, statistically combined  
26  
27 58 results from  $\geq 2$  RCTs, and evaluated the effects of a drug or class of drugs.  
28  
29

30 59 **Results:** 90 of 107 (84%) Cochrane meta-analyses reported funding sources for some or all  
31  
32 60 included trials compared with 21 of 143 (15%) non-Cochrane meta-analyses, a difference of 69%  
33  
34 61 (95% confidence interval [CI], 59% to 77%). Percent reporting was also higher for Cochrane  
35  
36 62 meta-analyses compared with non-Cochrane meta-analyses for trial author-industry financial ties  
37  
38 63 (44% versus 1%; 95% CI for difference, 33% to 52%) and employment (17% versus 1%; 95%  
39  
40 64 CI for difference, 9% to 24%). In multivariable analysis, compared with Cochrane meta-  
41  
42 65 analyses, the odds ratio for reporting trial funding was  $\leq 0.11$  for all other journal category and  
43  
44 66 impact factor combinations. Compared with Cochrane reviews from 2010, reporting of funding  
45  
46 67 sources of included RCTs among recently published Cochrane meta-analyses improved by 54%  
47  
48 68 (95% CI, 42% to 63%), and reporting of trial author-industry financial ties and employment  
49  
50 69 improved by 37% (95% CI, 26% to 47%) and 10% (95% CI, 2% to 19%).  
51  
52  
53  
54  
55  
56  
57  
58  
59  
60

1  
2  
3 70 **Conclusions:** Reporting of trial funding sources, trial author-industry financial ties, and trial  
4  
5 71 author-industry employment in Cochrane meta-analyses has improved since 2010 and is higher  
6  
7 72 than in non-Cochrane meta-analyses.  
8  
9  
10  
11  
12  
13  
14  
15  
16  
17  
18  
19  
20  
21  
22  
23  
24  
25  
26  
27  
28  
29  
30  
31  
32  
33  
34  
35  
36  
37  
38  
39  
40  
41  
42  
43  
44  
45  
46  
47  
48  
49  
50  
51  
52  
53  
54  
55  
56  
57  
58  
59  
60

For peer review only

1  
2  
3 73 **Strengths and limitations of this study**  
4

- 5 74
- 6 • We assessed reporting in 250 recently published meta-analyses, including 107  
7  
8 75 Cochrane meta-analyses.
  - 9  
10 76 • The meta-analyses selected for inclusion in our study were representative of the  
11  
12 77 spectrum of meta-analyses of drug interventions and the journals where they were  
13  
14 78 published in 2016-2018.
  - 15  
16  
17 79 • We compared reporting practices among Cochrane and non-Cochrane meta-  
18  
19 80 analyses and recent Cochrane meta-analyses with Cochrane systematic reviews  
20  
21 81 from 2010.
  - 22  
23  
24 82 • Most meta-analyses of drug trials are published as Cochrane reviews or in  
25  
26 83 relatively low-impact specialty medicine journals. Thus, we were unable to  
27  
28 84 examine whether meta-analyses published in different types of journals or  
29  
30 85 journals with different impact factors are more or less likely to report on financial  
31  
32 86 conflicts of interest from included trials.
  - 33  
34  
35 87 • Our study examined only disclosed financial conflicts of interest and did not  
36  
37 88 attempt to identify non-disclosed conflicts.
- 38  
39  
40  
41  
42  
43  
44  
45  
46  
47  
48  
49  
50  
51  
52  
53  
54  
55  
56  
57  
58  
59  
60



1  
2  
3 89 Financial conflicts of interest (FCOIs) can introduce bias in drug trials by influencing  
4  
5 90 how a trial is designed, inclusion and exclusion criteria, choice of drug dosages and comparators,  
6  
7 91 selection of trial outcomes, how analyses are conducted, interpretation of findings, which  
8  
9  
10 92 outcomes are reported, and whether trial results are published.<sup>1-9</sup> Drug trials funded by industry  
11  
12 93 are approximately 30% more likely to report favourable efficacy findings than non-industry  
13  
14 94 trials,<sup>8</sup> and drug trials with principal investigators with FCOIs have higher odds of reporting  
15  
16 95 favourable outcomes than those led by principal investigators without FCOIs, even after  
17  
18 96 controlling for trial funding sources.<sup>7</sup>  
19  
20

21 97 Previous studies that have examined meta-analyses of drug trials published in high-  
22  
23 98 impact journals and Cochrane systematic reviews of drug trials have found that funding sources  
24  
25 99 and author FCOIs of included randomized controlled trials (RCTs) were rarely reported.<sup>10, 11</sup> A  
26  
27  
28 100 2011 study found that only 2 of a sample of 29 (7%) meta-analyses on the effects of drug  
29  
30 101 interventions published in high-impact journals in 2009 reported the funding sources of included  
31  
32 102 drug trials and that none reported trial author-industry financial ties or author-industry  
33  
34 103 employment.<sup>10</sup> A second study, published in 2012, examined Cochrane systematic reviews of  
35  
36 104 drug trials and found that only 46 of 151 (30%) eligible reviews published in 2010 reported  
37  
38 105 information on the funding source of some or all included trials, 11 (7%) provided any  
39  
40 106 information on author-industry financial ties, and 10 (7%) provided any information on author-  
41  
42 107 industry employment from included trials.<sup>11</sup>  
43  
44  
45

46 108 In 2012, the Cochrane Collaboration began to require that Cochrane reviews report trial  
47  
48 109 funding sources and FCOIs of the primary researchers of all included trials in the characteristics  
49  
50 110 of included studies table (Methodological Expectations of Cochrane Intervention Reviews  
51  
52 111 (MECIR), standards R69 and R70).<sup>12-13</sup> The Preferred Reporting Items for Systematic Reviews  
53  
54  
55  
56  
57  
58  
59  
60

1  
2  
3 112 and Meta-analyses (PRISMA) statement, however, has not been updated since its publication in  
4  
5 113 2009<sup>14, 15</sup> and does not address the reporting of trial funding or author FCOIs of trials included in  
6  
7  
8 114 systematic reviews and meta-analyses.

9  
10 115 We do not know of any studies that have compared reporting among Cochrane meta-  
11  
12 116 analyses with meta-analyses published in other journals or examined whether reporting in  
13  
14  
15 117 Cochrane reviews has improved since Cochrane implemented its reporting policy. The objectives  
16  
17 118 of the present study were to (1) investigate the extent to which Cochrane and non-Cochrane  
18  
19 119 meta-analyses of drug trials report trial funding sources, author-industry financial ties, and  
20  
21 120 author-industry employment; (2) examine characteristics of meta-analyses that are independently  
22  
23 121 associated with reporting funding sources of included RCTs; and (3) compare reporting among  
24  
25 122 recently published Cochrane meta-analyses to reporting from Cochrane systematic reviews  
26  
27 123 published in 2010,<sup>11</sup> prior to implementation of Cochrane's reporting policy.

## 30 124 **METHODS**

31  
32  
33 125 The methods for the present study were based on our previous study of reporting of  
34  
35 126 funding sources, author-industry financial ties, and author-industry employment from trials  
36  
37 127 included in Cochrane systematic reviews published in 2010; however in the present study, we  
38  
39 128 included only Cochrane reviews that contained a meta-analysis, whereas in the previous study all  
40  
41 129 Cochrane reviews that included results from at least one RCT were eligible.<sup>11</sup> Because of this  
42  
43 130 difference, in our comparison, in addition to main analyses, we conducted sensitivity analyses  
44  
45 131 that only included systematic reviews with meta-analyses from the previous study. A study  
46  
47 132 protocol was developed prior to initiating the present study and was posted on the Open Science  
48  
49 133 Framework (<https://osf.io/njk5w/>).

### 50 134 **Selection of meta-analyses**

1  
2  
3 135 Meta-analyses in any language were eligible if they (1) included a documented search for  
4  
5 136 eligible RCTs using at least one database, (2) statistically combined results from  $\geq 2$  RCTs, and  
6  
7  
8 137 (3) evaluated the efficacy/effectiveness or harm of a drug or class of drugs against an alternative  
9  
10 138 treatment (e.g., placebo, alternative drug, non-pharmacological treatment) or no treatment. Meta-  
11  
12 139 analyses that only assessed different methods of administration, dosages, or dosage schedules of  
13  
14 140 the same drug were excluded. Drugs were defined broadly to include biologics and vaccines, but  
15  
16  
17 141 not nutritional supplements or medical devices without a drug component. Meta-analyses that  
18  
19 142 investigated a combination of pharmacological and non-pharmacological interventions or  
20  
21 143 interventions which may or may not involve a drug (e.g., amnioinfusion) were included if a study  
22  
23 144 group was exclusively given a drug intervention or if the meta-analysis assessed the addition of a  
24  
25 145 drug to a treatment received by both intervention and control groups. Interventions were  
26  
27  
28 146 classified as having a drug component if any form of the active ingredient (e.g., dosage, route,  
29  
30  
31 147 strength, compound) was listed as an approved or discontinued brand name, generic drug or  
32  
33 148 therapeutic biological product by the US Food and Drug Administration (FDA) as listed in the  
34  
35 149 Drugs@FDA database at the time of review.<sup>16</sup> If an agent was not listed in the Drugs@FDA  
36  
37  
38 150 database and was classified by the FDA as a non-drug (e.g., food additive, supplement), then it  
39  
40 151 was not considered a drug. If an agent was not regulated as a drug and was not listed as a non-  
41  
42 152 drug by the FDA, drug status was determined based on consensus among investigators using  
43  
44  
45 153 publicly available sources that provided information on the agent.

46  
47 154 We searched the MEDLINE database via PubMed on October 19, 2018 using a search  
48  
49 155 developed by a medical librarian (see eMethods1 for strategy). Citations were uploaded into the  
50  
51 156 systematic review software DistillerSR (Evidence Partners, Ottawa, Canada), which was used to  
52  
53  
54 157 code and track results. Two investigators independently evaluated titles and abstracts for  
55  
56

1  
2  
3 158 potential eligibility. Full texts of titles and abstracts deemed potentially eligible by either  
4  
5 159 investigator were then reviewed by two investigators independently. Disagreements at the full-  
6  
7 160 text level were resolved through consensus with a third investigator consulted as necessary.  
8  
9  
10 161 Because we sought to include the most recently published meta-analyses that met eligibility  
11  
12 162 criteria, prior to reviewing, citations were organized by PubMed reference identification numbers  
13  
14 163 with the most recent first. Title and abstract and full-text reviews were conducted sequentially  
15  
16  
17 164 until we obtained our desired number of included meta-analyses based on our power analysis.  
18

### 19 165 **Data extraction**

20  
21 166 For each eligible meta-analysis, one reviewer initially extracted all data into a pre-defined  
22  
23 167 form in DistillerSR, and a second reviewer validated all extracted data using the DistillerSR  
24  
25 168 Quality Control function. Discrepancies were resolved by consensus and consultation with a  
26  
27 169 third investigator, if needed. For each included meta-analysis, reviewers extracted first author  
28  
29 170 last name; year of publication; journal name; Clarivate Analytics 2017 journal impact factor;  
30  
31 171 journal speciality area based on Clarivate Analytics classification; whether it was a Cochrane  
32  
33 172 meta-analysis published in the Cochrane Database of Systematic Reviews or elsewhere; funding  
34  
35 173 source for the meta-analysis and author-industry financial ties and employment; reporting in the  
36  
37 174 meta-analysis of trial funding sources, trial author-industry financial ties, and trial author-  
38  
39 175 industry employment; and whether the meta-analysis referenced a published protocol or  
40  
41 176 contained a PROSPERO registration number. If a registration number was not provided, we  
42  
43 177 searched the PROSPERO website (<https://www.crd.york.ac.uk/PROSPERO/>) using key terms  
44  
45 178 from the published article, then attempted to match the principal investigator, funding source,  
46  
47 179 intervention, non-intervention comparator group, and design from the article to registrations  
48  
49  
50  
51  
52 180 obtained in the search.  
53  
54  
55  
56  
57  
58  
59  
60

1  
2  
3 181 To extract information on meta-analysis funding source, meta-analysis author-industry  
4  
5 182 financial ties, and meta-analysis author-industry employment and to determine whether or not  
6  
7 183 trial funding sources, trial author-industry financial ties, and trial author-industry employment  
8  
9  
10 184 were reported in the meta-analysis, for each included meta-analysis, reviewers examined all text,  
11  
12 185 tables, figures, appendices, disclosure statements, acknowledgements and any online  
13  
14  
15 186 supplemental material, published with the manuscript or linked to the manuscript. Funding  
16  
17 187 sources for meta-analyses were classified as (1) non-industry (e.g., public granting agency,  
18  
19 188 private not-for-profit granting agency), (2) pharmaceutical industry, (3) combined  
20  
21 189 pharmaceutical industry and non-industry, (4) no funding or (5) not reported. Financial ties of  
22  
23 190 meta-analysis authors to industry were defined per the International Committee of Medical  
24  
25 191 Journal Editors Uniform Disclosure Form for Potential Conflicts of Interest<sup>17</sup> and included  
26  
27 192 current or former board membership, current or former consultancy, current or former industry  
28  
29 193 employment, expert testimony, industry grants (issued or pending), payment for lectures  
30  
31 194 including service on speakers bureaus, payment for manuscript preparation, patents (planned,  
32  
33 195 pending, or issued), royalties, payment for development of educational presentations, stock or  
34  
35 196 stock options, travel reimbursement, or other relationships with industry, as disclosed in the  
36  
37 197 review. Of these, we specifically coded if industry employees were part of the author group. If a  
38  
39 198 meta-analysis did not contain a disclosure statement, meta-analysis author-industry financial ties  
40  
41  
42 199 were coded as not reported.  
43  
44  
45

46  
47 200 For reporting of (1) trial funding sources, (2) trial author-industry financial ties, and (3)  
48  
49 201 trial author-industry employment, meta-analyses were coded as (1) reporting for all included  
50  
51 202 trials; (2) reporting for some, but not all, included trials; or (3) not reporting. Meta-analyses that  
52  
53 203 included data from a pharmaceutical industry database or noted that trial drugs were supplied by  
54  
55  
56  
57  
58  
59  
60

1  
2  
3 204 the manufacturers for certain trials, but that did not make any explicit statement of trial funding  
4  
5 205 sources, were coded as not reporting. For meta-analyses that reported information on funding  
6  
7 206 sources or author FCOIs from included trials, either fully or partially, we recorded where in the  
8  
9 207 meta-analysis the information was reported. Specifically, we recorded whether the information  
10  
11 208 was reported in the abstract, lay summary, risk of bias material (text, figure or table, both), main  
12  
13 209 text other than risk of bias, elsewhere in the main document (e.g., characteristics of included  
14  
15 210 studies table, other table, footnote of a table), or in an online appendix. See eMethods2.

### 19 211 **Power analysis**

21 212 To determine the number of meta-analyses to target, we first calculated the number of  
22  
23 213 included meta-analyses that would be needed for 80% power to find a statistically significant  
24  
25 214 difference if there were a 20% difference in reporting trial funding sources based on meta-  
26  
27 215 analysis characteristics, with  $\alpha = 0.05$ . We varied the rates of reporting from 10% versus 30% to  
28  
29 216 70% versus 90% and considered scenarios where the proportion of reporting meta-analyses with  
30  
31 217 each characteristic (e.g., high-impact journals versus low-impact journals) was 50% versus 50%  
32  
33 218 and 30% versus 70%. For a two-tailed binomial test with  $\alpha = 0.05$ , the maximum number of  
34  
35 219 included meta-analyses needed in any scenario was 239. Because the consequence of  
36  
37 220 overpowering the study was additional labour and not risk to human participants, we rounded  
38  
39 221 this number up to 250 meta-analyses. See eMethods3.

### 44 222 **Statistical analyses**

46 223 We presented characteristics of included meta-analyses descriptively, including funding  
47  
48 224 sources and FCOIs. We determined the proportion of meta-analyses that reported trial funding  
49  
50 225 source, author-industry financial ties, and author-industry employment of included trials for (1)  
51  
52 226 all included trials, (2) some, but not all, included trials, and (3) no included trials, along with  
53  
54  
55  
56  
57  
58  
59  
60

1  
2  
3 227 95% confidence intervals (CIs). We compared the difference between the proportion of recently  
4  
5 228 published Cochrane meta-analyses that reported study funding, author-industry financial ties, and  
6  
7 229 author-industry employment from included RCTs with recently published non-Cochrane meta-  
8  
9 230 analyses and with Cochrane systematic reviews published in 2010. Because the present study  
10  
11 231 included meta-analyses only, but the previous study of Cochrane reviews included systematic  
12  
13 232 reviews with or without meta-analyses,<sup>11</sup> we conducted a sensitivity analysis in which we  
14  
15 233 excluded Cochrane systematic reviews from 2010 that did not include a meta-analysis and would  
16  
17 234 not have been eligible for inclusion in the present study. We calculated 95% CIs for all  
18  
19 235 differences.<sup>18</sup>

20  
21  
22  
23  
24 236 To assess the relationship between meta-analysis characteristics and reporting of funding  
25  
26 237 sources for some or all included trials, versus not reporting, we fit unadjusted (bivariate) and  
27  
28 238 adjusted (multivariate) logistic regression models with all predictors using the glm function in R  
29  
30 239 (R version 3.2.3; RStudio Version 1.0.136).<sup>19,20</sup> The predictor variables that were considered in  
31  
32 240 bivariate and adjusted analyses were: (1) combined category (Cochrane, specialty medicine,  
33  
34 241 general medicine, multidisciplinary) and impact factor of the journal in which the meta-analysis  
35  
36 242 was published; and (2) whether there was industry funding for the meta-analysis or any FCOI  
37  
38 243 disclosed by meta-analysis authors. We combined journal category and impact factor because of  
39  
40 244 the small number of journals in some categories and the small number of journals with impact  
41  
42 245 factor greater than that of Cochrane. Thus, meta-analyses were categorized as (1) low-impact ( $\leq$   
43  
44 246 3.0) specialty medicine journals, (2) low-impact ( $\leq$  3.0) general medicine or multidisciplinary  
45  
46 247 journals, (3) medium-impact (3.1 - 6.7) specialty medicine journals, (4) high-impact ( $>$  6.8)  
47  
48 248 specialty medicine or general medicine journals, and (5) Cochrane meta-analyses (impact factor  
49  
50 249 = 6.8; reference category). Because 28 of 33 meta-analyses in general medicine journals were  
51  
52  
53  
54  
55  
56  
57  
58  
59  
60

1  
2  
3 250 from a single journal (*Medicine*) and not necessarily representative of general medicine as a  
4  
5 251 category, and because 9 of the 10 meta-analyses published in multidisciplinary science journals  
6  
7 252 were published in a single journal (*PLOS ONE*), we combined general medicine and  
8  
9 253 multidisciplinary journals.

10  
11  
12 254 Our initial protocol indicated that, if possible, we would include in the logistic regression  
13  
14 255 model the year of publication of the meta-analysis and whether there was meta-analysis funding  
15  
16 256 by industry, meta-analysis author-industry financial ties, and meta-analysis author-industry  
17  
18 257 employment, separately. However, 246 of 250 included meta-analyses were published in 2017-  
19  
20 258 2018, and only 3 meta-analyses had industry funding; thus, we did not include year of  
21  
22 259 publication, and we grouped meta-analysis funding source and author FCOIs into a single  
23  
24 260 variable (No FCOIs including funding source versus any FCOI). Additionally, we only  
25  
26 261 conducted a multivariable analysis for the reporting of funding sources of included RCTs and not  
27  
28 262 for reporting of author-industry financial ties and author-industry employment, because there  
29  
30 263 were not enough examples of meta-analyses that reported author-industry financial ties and  
31  
32 264 author-industry employment.

### 33 265 **Patient and Public Involvement**

34  
35 266 Patients and members of the public were not involved in the  
36  
37 267 design, conduct, reporting, or plan for dissemination of our  
38  
39 268 research.

## 40 269 **RESULTS**

### 41 270 **Selection of eligible meta-analyses**

42 271 Our initial search of PubMed without date restrictions retrieved 9,725 unique citations.  
43  
44 272 To select 250 eligible meta-analyses, working backwards from the most recent, a total of 401  
45  
46  
47  
48  
49  
50  
51  
52  
53  
54  
55  
56  
57  
58  
59  
60



1  
2  
3 273 citations were screened for eligibility; 64 were excluded at the title and abstract level and 76 at  
4  
5 274 the full-text level. See Figure 1.

6  
7  
8 275 As shown in Table 1, of the 250 included meta-analyses, 107 (43%) were Cochrane  
9  
10 276 reviews, all of which were published in the Cochrane Database of Systematic Reviews. Among  
11  
12 277 the 143 non-Cochrane meta-analyses, 33 (23%) were published in general medicine journals  
13  
14 278 (including 28 in the journal *Medicine*), 100 (70%) in specialty medicine journals, and 10 (7%) in  
15  
16 279 multidisciplinary journals (including 9 in *PLOS ONE*). The mean number of included RCTs for  
17  
18 280 both Cochrane and non-Cochrane meta-analyses was approximately 20. Among the 143 non-  
19  
20 281 Cochrane meta-analyses, 25 (17%) referenced a published protocol or were registered in  
21  
22 282 PROSPERO, and 106 (74%) were published in a journal with impact factor  $\leq 3$ .

23  
24  
25  
26 283 Of the 250 meta-analyses, 3 (1%) reported being funded by industry, 148 (59%) reported  
27  
28 284 funding from non-industry sources, 56 (22%) reported no funding, and 43 (17%) did not report  
29  
30 285 funding source; 3 (1%) had at least 1 author who reported current industry employment, 51  
31  
32 286 (20%) had at least 1 author that reported other financial ties with industry, 187 (75%) reported  
33  
34 287 that there were no authors with FCOIs, and 12 (5%) did not report any information about author  
35  
36 288 FCOIs. Characteristics of each of the 250 included meta-analyses are shown in eTable 1.

### 37 38 39 40 289 **Reporting in meta-analyses of funding sources and author FCOIs from included drug trials**

41  
42 290 As shown in Table 2, 111 of the 250 (44%) included meta-analyses reported the funding  
43  
44 291 sources for some or all included trials, 49 (20%) reported author-industry financial ties for some  
45  
46 292 or all included trials, and 19 (8%) reported author-industry employment for some or all included  
47  
48 293 trials. Of the 107 Cochrane meta-analyses, 90 (84%) reported funding sources for some or all  
49  
50 294 included trials compared with 21 of 143 (15%) non-Cochrane meta-analyses, a difference of 69%  
51  
52 295 (95% CI, 59% to 77%); 47 (44%) Cochrane meta-analyses reported author-industry financial ties  
53  
54  
55  
56  
57  
58  
59  
60

1  
2  
3 296 for some or all included trials compared with 2 (1%) non-Cochrane meta-analyses, a difference  
4  
5 297 of 43% (95% CI, 33% to 52%); 18 (17%) Cochrane meta-analyses reported, fully or partially,  
6  
7 298 author-industry employment compared with 1 (1%) non-Cochrane meta-analysis, a difference of  
8  
9 299 16% (95% CI, 9% to 24%).

10  
11  
12 300 Among the 90 Cochrane meta-analyses that reported funding sources for some or all  
13  
14 301 included trials, 77 (86%) provided this information in the characteristics of included studies  
15  
16 302 table, including 23 (26%) that also included it in the assessment of risk of bias of included trials;  
17  
18 303 7 (8%) included it in the risk of bias assessment and at least one other place, but not the  
19  
20 304 characteristics of included studies table, and 6 (7%) reported only as part of the risk of bias  
21  
22 305 assessment. In total, 36 (40%) reported in the context of the risk of bias assessment. See eTable2  
23  
24 306 for reporting for all 250 included meta-analyses.

### 25 26 27 28 307 **Factors associated with reporting FCOIs from included trials in multivariable analysis**

29  
30  
31 308 As shown in Table 3, the odds ratio for reporting funding sources for some or all included  
32  
33 309 RCTs among non-Cochrane meta-analyses was  $\leq 0.11$  compared with Cochrane meta-analyses  
34  
35 310 for all journal category and impact factor combinations. Meta-analyses with any declared FCOI  
36  
37 311 (OR 1.29, 95% CI 0.53 to 3.19) and meta-analyses for which the presence of FCOIs was not  
38  
39 312 reported (OR 1.18, 95% CI 0.40 to 3.44) did not differ significantly in reporting compared with  
40  
41 313 those with no declared FCOIs.

### 42 43 44 314 **Comparison of recent Cochrane meta-analyses versus Cochrane reviews published in 2010**

45  
46  
47 315 Reporting of funding sources for some or all included trials improved from 30% in  
48  
49 316 Cochrane reviews of drug trials published in 2010 to 84% in recently published Cochrane meta-  
50  
51 317 analyses, an improvement of 54% (95% CI, 42% to 63%). Reporting of author-industry financial  
52  
53 318 ties for some or all included trials improved from 7% in 2010 to 44% in recent meta-analyses, a

319 37% change (95% CI, 26% to 47%). Reporting of author-industry employment for some or all  
320 included trials improved from 7% in 2010 to 17% in recent meta-analyses (10%; 95% CI, 2% to  
321 19%). Results did not change when the comparison was restricted to Cochrane reviews published  
322 in 2010 that included a meta-analysis. See Table 2. Figure 2 summarizes reporting among  
323 recently published Cochrane and non-Cochrane meta-analyses and Cochrane reviews from 2010.

## 324 **DISCUSSION**

### 325 **Principal findings**

326 We reviewed the 250 most recent meta-analyses of drug treatments listed in PubMed at  
327 the time of our search. Of these, 107 (43%) were Cochrane reviews, 100 (40%) were published  
328 in specialty medicine journals, and 43 (17%) were published in general medicine or  
329 multidisciplinary journals, including 28 in *Medicine* and 9 in *PLOS ONE*. Of the 143 non-  
330 Cochrane meta-analyses, 106 (74%) were published in journals with impact factor  $\leq 3$ .

331 Among Cochrane meta-analyses, 84% reported funding sources for some or all included  
332 RCTs compared with 15% of non-Cochrane meta-analyses. Cochrane meta-analyses were also  
333 more likely than non-Cochrane meta-analyses to report author-industry financial ties (44%  
334 versus 1%) and author-industry employment (17% versus 1%).

335 In 2010, only 30% of 151 Cochrane systematic reviews of drug treatments reported trial  
336 funding sources.<sup>11</sup> This improved to 84% among recent Cochrane meta-analyses. Cochrane  
337 reviews also improved reporting of author-industry financial ties and author-industry  
338 employment of included RCTs from 7% to 44% and from 7% to 17%. It is possible that the  
339 reason that few meta-analyses reported author-industry employment is because some may have  
340 assumed that author-industry employment would be considered a type of author-industry

1  
2  
3 341 financial tie and did not report employment separately, whereas we considered author-industry  
4  
5 342 financial ties and employment separately.  
6

7  
8 343 Among the 90 Cochrane meta-analyses that reported funding sources of included trials in  
9  
10 344 the present study, 86% included the information in the characteristics of included studies table,  
11  
12 345 as required by Cochrane, and 40% included the information in the risk of bias assessment.  
13

#### 14 346 **Findings in context**

15  
16  
17 347 In 2012, soon after our previous results showed that few Cochrane systematic reviews of  
18  
19 348 drug trials reported funding sources and author FCOIs of included trials,<sup>11</sup> the Cochrane  
20  
21 349 Collaboration began to require that trial funding sources and FCOIs be reported for every  
22  
23 350 included RCT in the characteristics of included studies table.<sup>12-13</sup> Reporting of trial funding  
24  
25 351 sources among recent Cochrane meta-analyses has not reached 100%, and work is needed to  
26  
27 352 improve the reporting of other types of author FCOIs, which was under 50% despite being  
28  
29 353 required by Cochrane. Nonetheless, the improvements documented in the present study are  
30  
31 354 substantial, both compared with previous Cochrane reviews and with contemporary non-  
32  
33 355 Cochrane meta-analyses. Cochrane is a global organization consisting of a large number of  
34  
35 356 different review and methods groups that span numerous fields of health research. This diversity  
36  
37 357 suggests that changes that have occurred likely resulted from change in the mandatory reporting  
38  
39 358 requirements for Cochrane reviews and widespread adoption by the organization. It also suggests  
40  
41 359 the possibility that other journals could improve the transparency of reporting of trial funding  
42  
43 360 and trial author FCOI in evidence syntheses by adopting similar reporting requirements. The  
44  
45 361 current version of the PRISMA statement does not address reporting of  
46  
47 362 trial funding sources and FCOIs of trial authors by investigators who publish systematic reviews  
48  
49 363 and meta-analyses.<sup>15,16</sup> The forthcoming updated PRISMA statement, however, will require that  
50  
51  
52  
53  
54  
55  
56  
57  
58  
59  
60

1  
2  
3 364 trial funding, although not trial author FCOIs, be reported (personal communication, David  
4  
5 365 Moher, May 22, 2019).

6  
7 366 Members of our research team have previously recommended that risk of bias from trial  
8  
9 367 funding and trial author FCOIs be included in the Cochrane Risk of Bias Tool based on evidence  
10  
11 368 that links trial sponsorship and trial author FCOIs to outcomes.<sup>10</sup> This recommendation was  
12  
13 369 debated at a Cochrane Methods Symposium in 2013, but consensus was not reached for  
14  
15 370 inclusion.<sup>12,21</sup> The present study found that 40% of Cochrane meta-  
16  
17 371 analyses that reported on FCOIs from included trials included  
18  
19 372 this as part of a risk of bias assessment, even though this has  
20  
21 373 not been recommended by Cochrane. Currently, a new tool, the Tool  
22  
23 374 for Addressing Conflicts of Interest in Trials (TACIT),<sup>22</sup> which specifically addresses risk of bias  
24  
25 375 from industry sponsorship of trials and author-industry financial ties and employment, is being  
26  
27 376 developed for inclusion in Cochrane reviews. Once the TACIT tool is completed, risk of bias  
28  
29 377 from trial funding and trial author FCOIs will be explicitly considered in Cochrane reviews and,  
30  
31 378 potentially, in non-Cochrane reviews, as well. Meanwhile, authors should, at a minimum,  
32  
33 379 describe FCOIs and discuss the degree to which they may influence confidence in findings.

### 34 **Strengths and limitations**

35  
36 381 A strength of the present study is that we assessed reporting in a large number of recently  
37  
38 382 published meta-analyses, including 107 Cochrane meta-analyses, which allowed us to compare  
39  
40 383 reporting practices among Cochrane and non-Cochrane meta-analyses and recent Cochrane  
41  
42 384 meta-analyses with Cochrane systematic reviews from 2010. However, there are limitations that  
43  
44 385 should be considered. First, since most meta-analyses of drug trials are published as Cochrane  
45  
46 386 reviews or in relatively low-impact specialty medicine journals, we were not able to conduct

1  
2  
3 387 robust assessments of whether meta-analyses published in different types of journals or journals  
4  
5 388 with different impact factors are more or less likely to report on trial funding and trial author  
6  
7 389 FCOIs for included drug trials. The vast majority of meta-analyses published in general medicine  
8  
9 390 journals were from a single journal (*Medicine*), which further limited our ability to examine this  
10  
11 391 factor. On the other hand, the meta-analyses selected for inclusion in our study constituted a  
12  
13 392 consecutive sample of the most recent meta-analyses listed in PubMed and, thus, were  
14  
15 393 representative of the spectrum of meta-analyses of drug interventions and the journals where  
16  
17 394 they were published in 2016–2018. Second, our study examined only disclosed FCOIs. A  
18  
19 395 surprising finding was that a higher proportion of Cochrane meta-analysis authors indicated that  
20  
21 396 they had FCOIs compared with non-Cochrane authors; it is not known if this reflects greater  
22  
23 397 industry involvement among Cochrane authors or a higher propensity to report transparently and  
24  
25 398 completely among this group of authors. Third, information about FCOIs from included RCTs  
26  
27 399 was not extracted from the RCT publications. Finally, our previous study of Cochrane reviews  
28  
29 400 from 2010 included all systematic reviews, whereas the present study was restricted to reviews  
30  
31 401 with meta-analyses. However, a sensitivity analysis showed that results did not change when we  
32  
33 402 compared recent results to those from 2010 that were restricted to reviews with a meta-analysis.  
34  
35  
36  
37  
38  
39

### 403 **Conclusions and policy implications**

404 In summary, the percentage of recent Cochrane meta-analyses  
405 on the effects of drug interventions that transparently reported  
406 funding sources and trial author-industry financial ties and  
407 employment for included trials far exceeds reporting in other  
408 journals. It also far exceeds reporting in Cochrane systematic  
409 reviews published in 2010, before the implementation by Cochrane of its policy

1  
2  
3 410 requiring the reporting of trial funding sources and author-industry FCOIs. These results suggest  
4  
5 411 that it is possible to achieve more transparent reporting of FCOIs from trials included in meta-  
6  
7 412 analyses. We encourage the uptake and enforcement of reporting requirements in the  
8  
9  
10 413 forthcoming updated PRISMA statement.<sup>23</sup> We also encourage the adoption of Cochrane's new  
11  
12 414 TACIT tool<sup>22</sup> by journals and authors in order to assess trial funding sources and author FCOIs  
13  
14 415 as risks of bias. Continued non-disclosure of FCOIs when evidence is synthesized in meta-  
15  
16 416 analyses misleads readers of medical journals into believing that there is not risk of bias from  
17  
18 417 FCOIs to be considered, even though an increasingly robust evidence base tells us that this is  
19  
20  
21 418 often not the case.<sup>7,8</sup>  
22  
23  
24  
25  
26  
27  
28  
29  
30  
31  
32  
33  
34  
35  
36  
37  
38  
39  
40  
41  
42  
43  
44  
45  
46  
47  
48  
49  
50  
51  
52  
53  
54  
55  
56  
57  
58  
59  
60

1  
2  
3 419 **Acknowledgement:** The authors thank Drs. Ian Shrier and Jonathan Kimmelman for providing  
4  
5 420 helpful comments on an earlier version of the manuscript. They were not compensated for their  
6  
7 421 contribution.

8  
9  
10 422 **Contributors:** KAT, MR, JB, LAB, JL, EHT, AB, and BDT were responsible for the study  
11  
12 423 conception and design. KAT, ACJ, CB, and KE were responsible for title and abstract and full-  
13  
14 424 text review. KAT and ACJ were responsible for data extraction and validation. KAT, BL, AB,  
15  
16 425 and BDT analysed and interpreted results. KAT and BDT drafted the  
17  
18 426 manuscript. All authors provided a critical review and approved  
19  
20 427 the final manuscript. BDT is the guarantor.

21  
22  
23 428 **Copyright for authors:** The Corresponding Author has the right to  
24  
25 429 grant on behalf of all authors and does grant on behalf of all  
26  
27 430 authors, a worldwide licence  
28  
29 431 (<http://www.bmj.com/sites/default/files/BMJ%20Author%20Licence%20March%202013.doc>) to the Publishers and its licensees in  
30  
31 432  
32  
33 433 perpetuity, in all forms, formats and media (whether known now  
34  
35 434 or created in the future), to i) publish, reproduce, distribute,  
36  
37 435 display and store the Contribution, ii) translate the  
38  
39 436 Contribution into other languages, create adaptations, reprints,  
40  
41 437 include within collections and create summaries, extracts  
42  
43 438 and/or, abstracts of the Contribution and convert or allow  
44  
45 439 conversion into any format including without limitation audio,  
46  
47 440 iii) create any other derivative work(s) based in whole or part  
48  
49 441 on the on the Contribution, iv) to exploit all subsidiary rights  
50  
51 442 to exploit all subsidiary rights that currently exist or as may



1  
2  
3 443 exist in the future in the Contribution, v) the inclusion of  
4  
5 444 electronic links from the Contribution to third party material  
6  
7 445 where-ever it may be located; and, vi) licence any third party  
8  
9 446 to do any or all of the above. All research articles will be  
10  
11 447 made available on an open access basis (with authors being asked  
12  
13 448 to pay an open access fee—see [http://www.bmj.com/about-](http://www.bmj.com/about-bmj/resources-authors/forms-policies-and-checklists/copyright-open-access-and-permission-reuse)  
14  
15 449 [bmj/resources-authors/forms-policies-and-checklists/copyright-](http://www.bmj.com/about-bmj/resources-authors/forms-policies-and-checklists/copyright-open-access-and-permission-reuse)  
16  
17 450 [open-access-and-permission-reuse](http://www.bmj.com/about-bmj/resources-authors/forms-policies-and-checklists/copyright-open-access-and-permission-reuse)). The terms of such open access  
18  
19 451 shall be governed by a Creative Commons licence—details as to  
20  
21 452 which Creative Commons licence will apply to the research  
22  
23 453 article are set out in our worldwide licence referred to above.  
24  
25  
26 454 **Funding:** Ms. Turner was supported by a Fonds de Recherche Québec - Santé  
27  
28 455 (FRQ-S) masters training award, Ms. Levis was supported by a Canadian Institutes of Health  
29  
30 456 Research doctoral research award, and Drs. Benedetti and Thombs were supported by FRQ-S  
31  
32 457 researcher awards, all outside of the submitted work.  
33  
34  
35 458 **Declaration of Competing Interests:** All authors have completed the ICMJE uniform  
36  
37 459 disclosure form at [www.icmje.org/coi\\_disclosure.pdf](http://www.icmje.org/coi_disclosure.pdf). Dr. Bero disclosed that she  
38  
39 460 is Senior Editor, Cochrane Public Health and Health Systems, for  
40  
41 461 which the University of Sydney receives remuneration. Dr. Thombs  
42  
43 462 disclosed that he is a content editor with the Cochrane Common  
44  
45 463 Mental Disorders review group (no remuneration received). All  
46  
47 464 other authors declared: no support from any organisation for the submitted work; no  
48  
49 465 financial relationships with any organisations that might have an interest in the submitted work  
50  
51  
52  
53  
54  
55  
56  
57  
58  
59  
60

1  
2  
3 466 in the previous three years; no other relationships or activities that could appear to have  
4  
5 467 influenced the submitted work.

6  
7 468 **Ethics Statement:** As this study involved only the review of published articles, research ethics  
8  
9 469 approval was not required.

10  
11 470 **Transparency Declaration:** The manuscript's guarantor affirms that this manuscript is an  
12  
13 471 honest, accurate, and transparent account of the study being reported; that no important aspects  
14  
15 472 of the study have been omitted; and that any discrepancies from the study as planned (and, if  
16  
17 473 relevant, registered) have been explained.

18  
19 474 **Data Sharing:** All extracted data are available in the main tables or in eTable1 and eTable2. No  
20  
21 475 additional data were extracted.  
22  
23  
24  
25  
26  
27  
28  
29  
30  
31  
32  
33  
34  
35  
36  
37  
38  
39  
40  
41  
42  
43  
44  
45  
46  
47  
48  
49  
50  
51  
52  
53  
54  
55  
56  
57  
58  
59  
60

476 **REFERENCES**

- 477 1. Lexchin J, Bero LA, Djulbegovic B, Clark O. Pharmaceutical industry sponsorship and  
478 research outcome and quality: systematic review. *BMJ*. 2003;326(7400):1167-70.
- 479 2. Bero LA, Rennie D. Influences on the quality of published drug studies. *Int J Technol Assess*  
480 *Health Care*. 1996;12(2):209-37.
- 481 3. Melander H, Ahlqvist-Rastad J, Meijer G, Beermann B. Evidence based medicine—  
482 selective reporting from studies sponsored by pharmaceutical industry: review of studies in  
483 new drug applications. *BMJ*. 2003;326(7400):1171-3.
- 484 4. Rising K, Bacchetti P, Bero L. Reporting bias in drug trials submitted to the Food and Drug  
485 Administration: review of publication and presentation. *PLoS Med*. 2008;5(11):e217.4.
- 486 5. Sismondo S. How pharmaceutical industry funding affects trial outcomes: causal structures  
487 and responses. *Soc Sci Med*. 2008;66(9):1909-14.
- 488 6. Turner EH, Matthews AM, Linardatos E, Tell RA, Rosenthal R. Selective publication of  
489 antidepressant trials and its influence on apparent efficacy. *N Engl J Med*. 2008;358(3):252-  
490 60.
- 491 7. Ahn R, Woodbridge A, Abraham A, Saba S, Korenstein D, Madden E, et al. Financial ties of  
492 principal investigators and randomized controlled trial outcomes: cross sectional study. *BMJ*  
493 2017;356:i6770.
- 494 8. Lundh A, Lexchin J, Mintzes B, Schroll JB, Bero L. Industry sponsorship and research  
495 outcome. *Cochrane Database of Syst Rev*. 2017;2:MR000033.
- 496 9. Lexchin J. Those who have the gold make the evidence: how the pharmaceutical industry  
497 biases the outcomes of clinical trials of medications. *Sci Eng Ethics*. 2012;18(2):247-61.

- 1  
2  
3 498 10. Roseman M, Milette K, Bero LA, Coyne JC, Lexchin J, Turner EH, et al. Reporting of  
4  
5 499 conflicts of interest in meta-analyses of trials of pharmacological treatments. *JAMA*.  
6  
7 500 2011;305(10):1008-17.  
8  
9  
10 501 11. Roseman M, Turner EH, Lexchin J, Coyne JC, Bero LA, Thombs BD. Reporting of conflicts  
11  
12 502 of interest from drug trials in Cochrane reviews: cross sectional study. *BMJ*.  
13  
14 503 2012;345:e5155.  
15  
16  
17 504 12. Bero LA. Why the Cochrane risk of bias tool should include funding source as a standard  
18  
19 505 item. *Cochrane Database of Syst Rev*. 2013;12:ED000075.  
20  
21  
22 506 13. Higgins J, Lasserson T, Chandler J, Tovey D, Churchill R. Methodological expectatinos of  
23  
24 507 Cochrane intervention reviews (MECIR). Version July 2019. Available from:  
25  
26 508 <https://community.cochrane.org/mecir-manual>. Accessed August 22, 2019.  
27  
28  
29 509 14. Moher D, Liberati A, Tetzlaff J, Altman DG. Preferred reporting items for systematic  
30  
31 510 reviews and meta-analyses: the PRISMA statement. *BMJ*. 2009;339:b2535.  
32  
33  
34 511 15. Liberati A, Altman DG, Tetzlaff J, Mulrow C, Gøtzsche PC, Ioannidis JPA, et al. The  
35  
36 512 PRISMA statement for reporting systematic reviews and meta-analyses of studies that  
37  
38 513 evaluate healthcare interventions: explanation and elaboration. *BMJ*. 2009;339:b2700.  
39  
40  
41 514 16. Administration USFaD. Drugs@FDA: FDA Approved Drug Products Database. Available  
42  
43 515 from: <https://www.accessdata.fda.gov/scripts/cder/daf/>. Accessed August 22, 2019.  
44  
45  
46 516 17. Drazen JM, Van Der Weyden MB, Sahni P, Rosenberg J, Marusic A, Laine C, et al.  
47  
48 517 Uniform format for disclosure of competing interests in ICMJE journals. *JAMA*.  
49  
50 518 2010;303(1):75-6.  
51  
52  
53 519 18. Newcombe RG. Interval estimation for the difference between independent proportions:  
54  
55 520 comparison of eleven methods. *Stat Med*. 1998;17(8):873-90.  
56  
57  
58  
59  
60

- 1  
2  
3 521 19. R Core Team. *R: A language and environment for statistical computing*. R Foundation for  
4  
5 522 Statistical Computing; 2018.  
6  
7  
8 523 20. RStudio Team. *RStudio: Integrated development for R*. Boston, MA: RStudio, Inc.; 2015.  
9  
10 524 21. Sterne JA. Why the Cochrane risk of bias tool should not include funding source as a  
11  
12 525 standard item. *Cochrane Database Syst Rev*. 2013(12).  
13  
14  
15 526 22. Lundh A. Tool for Addressing Conflicts of Interest in Trials (TACIT) in Cochrane Reviews  
16  
17 527 [PowerPoint slides]. 2018.  
18  
19  
20 528 23. Page MJ, McKenzie JE, Bossuyt PM, Boutron I, Hoffmann T, Mulrow CD, Shamseer L,  
21  
22 529 Moher, D. Updating the PRISMA reporting guideline for systematic reviews and meta -  
23  
24 530 analyses: study protocol. 2018. Available from: <https://osf.io/xwcv5/>. Accessed August 22,  
25  
26 531 2019.  
27  
28  
29  
30  
31 532

1  
2  
3 533 **FIGURES**  
4  
5

6 534 **Figure 1.** Flow diagram of selection of eligible meta-analyses.  
7  
8

9 535 **Figure 2.** Percentage of recently published Cochrane and non-Cochrane meta-analyses and 2010  
10  
11  
12 536 Cochrane systematic reviews that reported included trial funding source, author-industry  
13  
14 537 financial ties, and author-industry employment for some or all included trials.  
15  
16

17  
18 538  
19  
20  
21  
22  
23  
24  
25  
26  
27  
28  
29  
30  
31  
32  
33  
34  
35  
36  
37  
38  
39  
40  
41  
42  
43  
44  
45  
46  
47  
48  
49  
50  
51  
52  
53  
54  
55  
56  
57  
58  
59  
60

**Table 1. Characteristics of included meta-analyses**

|                                                                                               | <b>Cochrane<br/>Meta-Analyses<br/>(N = 107)</b> | <b>Non-Cochrane<br/>Meta-Analyses<br/>(N = 143)</b> |
|-----------------------------------------------------------------------------------------------|-------------------------------------------------|-----------------------------------------------------|
| <b>Year of publication</b>                                                                    |                                                 |                                                     |
| 2016, <i>N (%)</i>                                                                            | 0                                               | 4 (3%)                                              |
| 2017, <i>N (%)</i>                                                                            | 22 (21%)                                        | 31 (22%)                                            |
| 2018, <i>N (%)</i>                                                                            | 85 (79%)                                        | 108 (76%)                                           |
| <b>Number of Included RCTs, mean ± SD</b>                                                     | 21.4 ± 24.4                                     | 19.6 ± 46.4                                         |
| <b>Registered in PROSPERO or Published Protocol, <i>N (%)</i></b>                             | 107 (100%)                                      | 25 (17%) <sup>a</sup>                               |
| <b>Impact Factor, mean ± SD</b>                                                               |                                                 |                                                     |
| ≤ 3                                                                                           | 0                                               | 106 (74%)                                           |
| 3.1-6.7                                                                                       | 0                                               | 27 (19%)                                            |
| 6.8                                                                                           | 107 (100%)                                      | 0                                                   |
| > 6.8                                                                                         | 0                                               | 10 (7.0%)                                           |
| <b>Meta-Analysis Funding Sources</b>                                                          |                                                 |                                                     |
| Not reported                                                                                  | 4 (4%) <sup>b</sup>                             | 39 (27%)                                            |
| Industry                                                                                      | 0                                               | 3 (2%)                                              |
| Non-Industry                                                                                  | 93 (87%)                                        | 55 (38%)                                            |
| No funding                                                                                    | 10 (9%)                                         | 46 (32%)                                            |
| <b>Meta-Analysis Author Financial Ties to Industry<br/>(Including Employment)<sup>c</sup></b> |                                                 |                                                     |
| Not reported, <i>N (%)</i>                                                                    | 1 (1%)                                          | 11 (8%)                                             |
| No authors with reported financial ties, <i>N (%)</i>                                         | 70 (65%)                                        | 117 (81%)                                           |

|                                                                            |           |          |
|----------------------------------------------------------------------------|-----------|----------|
| ≥ 1 author with reported financial ties, <i>N (%)</i>                      | 36 (34%)  | 15 (10%) |
| Proportion of authors with financial ties,<br><i>mean ± SD<sup>d</sup></i> | 11% ± 17% | 4% ± 15% |

### Journal Category

|                                                            |            |           |
|------------------------------------------------------------|------------|-----------|
| Cochrane review, <i>N (%)</i>                              | 107 (100%) | 0         |
| Specialty medicine <i>N (%)</i>                            | 0          | 100 (70%) |
| General medicine (non-Cochrane), <sup>f</sup> <i>N (%)</i> | 0          | 33 (23%)  |
| Multidisciplinary, <sup>g</sup> <i>N (%)</i>               | 0          | 10 (7%)   |

539 <sup>a</sup>One meta-analysis reported that they registered in PROSPERO but did not provide a registration number and one  
540 could not be found. We contacted the authors and they did not provide us with further information; thus this was  
541 coded as not registered. <sup>b</sup>Only 3 included meta-analyses reported author-industry employment and these were  
542 grouped with author-industry financial ties for this table <sup>c</sup>Cochrane reviews typically have a “Sources of Support”  
543 section with funding information. These reviews did not include that section. <sup>d</sup>Proportion of authors with financial  
544 ties or employment of those that reported. <sup>e</sup>Classifications for specialty medicine journals (note that some journals  
545 had more than one classification): Anesthesiology, N = 3; Biochemistry & Molecular Biology, N = 1; Biotechnology  
546 & Applied Microbiology, N = 2; Cardiac & Cardiovascular Systems, N = 7; Cell Biology, N = 1; Chemistry,  
547 Medicinal, N = 4; Chemistry, Multidisciplinary, N = 2; Clinical Neurology, N = 6; Critical Care Medicine, N = 2;  
548 Dermatology, N = 3; Emergency Medicine, N = 2; Endocrinology & Metabolism, N = 2; Gastroenterology &  
549 Hepatology, N = 6; Genetics & Heredity, N = 1; Hematology, N = 2; Immunology, N = 6; Infectious Diseases, N =  
550 = 3; Integrative & Complementary Medicine, N = 1; Medicine, Research & Experimental, N = 3; Microbiology, N =  
551 2; Neurosciences, N = 3; No classification, N = 2; Obstetrics & Gynecology, N = 4; Oncology, N = 11;  
552 Ophthalmology, N = 3; Orthopedics, N = 6; Parasitology, N = 1; Peripheral Vascular Disease, N = 5; Pharmacology  
553 & Pharmacy, N = 13; Physiology, N = 1; Psychiatry, N = 4; Psychology, N = 1; Reproductive Biology, N = 1;  
554 Respiratory System, N = 6; Rheumatology, N = 3; Sport Sciences, N = 1; Surgery, N = 11; Toxicology, N = 2;  
555 Tropical Medicine, N = 1; Urology & Nephrology, N = 1. <sup>f</sup>Of the 33 included general medicine journals, 28 were  
556 published in the journal “Medicine”. <sup>g</sup>Of the 10 journals classified as multidisciplinary, 9 were published in the  
557 journal “PLOS ONE”.



**Table 2. Summary of reporting patterns of disclosed funding source and author-industry FCOI from included RCTs**

|                                                                                                                                                   | Number of Meta-analyses Reporting Funding Sources of Included RCTs |                 |                  | Number of Meta-analyses Reporting Author Financial Ties of Included RCTs |                  |                  | Number of Meta-analyses Reporting Author-Industry Employment of Included RCTs |                 |                 |
|---------------------------------------------------------------------------------------------------------------------------------------------------|--------------------------------------------------------------------|-----------------|------------------|--------------------------------------------------------------------------|------------------|------------------|-------------------------------------------------------------------------------|-----------------|-----------------|
|                                                                                                                                                   | Full                                                               | Partial         | Full or Partial  | Full                                                                     | Partial          | Full or Partial  | Full                                                                          | Partial         | Full or Partial |
|                                                                                                                                                   | <b>Recently Published Meta-analyses:</b>                           |                 |                  |                                                                          |                  |                  |                                                                               |                 |                 |
| Cochrane (N = 107), N (%)                                                                                                                         | 70 (65%)                                                           | 20 (19%)        | 90 (84%)         | 24 (22%)                                                                 | 23 (21%)         | 47 (44%)         | 1 (1%)                                                                        | 17 (16%)        | 18 (17%)        |
| Non-Cochrane (N = 143), N (%)                                                                                                                     | 14 (10%)                                                           | 7 (5%)          | 21 (15%)         | 1 (1%)                                                                   | 1 (1%)           | 2 (1%)           | 0                                                                             | 1 (1%)          | 1 (1%)          |
| <b>Difference in Reporting Between Cochrane and Non-Cochrane Meta-analyses, % (95% CI)</b>                                                        | 56% (44% to 65%)                                                   | 14% (6% to 23%) | 69% (59% to 77%) | 22% (14% to 31%)                                                         | 21% (13% to 30%) | 43% (33% to 52%) | 1% (-2% to 5%)                                                                | 15% (9% to 23%) | 16% (9% to 24%) |
| <b>2010:</b>                                                                                                                                      |                                                                    |                 |                  |                                                                          |                  |                  |                                                                               |                 |                 |
| All Cochrane Systematic Reviews (N = 151), N (%) <sup>a</sup>                                                                                     | 30 (20%)                                                           | 16 (11%)        | 46 (30%)         | 2 (1%)                                                                   | 9 (6%)           | 11 (7%)          | 0                                                                             | 10 (7%)         | 10 (7%)         |
| <b>Difference in Reporting Between Recently Published Cochrane Meta-analyses versus Cochrane Systematic Reviews Published in 2010, % (95% CI)</b> | 46% (34% to 56%)                                                   | 8% (-1% to 18%) | 54% (42% to 63%) | 21% (13% to 30%)                                                         | 16% (7% to 25%)  | 37% (26% to 47%) | 1% (-2% to 5%)                                                                | 9% (2% to 18%)  | 10% (2% to 19%) |
| <b>2010:</b>                                                                                                                                      |                                                                    |                 |                  |                                                                          |                  |                  |                                                                               |                 |                 |
| Cochrane Meta-analyses (N = 119),                                                                                                                 | 21 (19%)                                                           | 15 (13%)        | 36 (30%)         | 0 (0%)                                                                   | 7 (6%)           | 7 (6%)           | 0 (0%)                                                                        | 7 (6%)          | 7 (6%)          |

N (%)

|                                           |              |              |              |              |             |              |             |             |             |
|-------------------------------------------|--------------|--------------|--------------|--------------|-------------|--------------|-------------|-------------|-------------|
| <b>Difference in Reporting Between</b>    | 48%          | 6%           | 54%          | 22%          | 16%         | 38%          | 1%          | 10%         | 11%         |
| <b>Recently Published Cochrane Meta-</b>  | (36% to 58%) | (-3% to 16%) | (42% to 63%) | (15% to 31%) | (7% to 25%) | (27% to 48%) | (-2% to 5%0 | (2% to 19%) | (3% to 20%) |
| <b>analyses versus Cochrane Meta-</b>     |              |              |              |              |             |              |             |             |             |
| <b>analyses Published in 2010, % (95%</b> |              |              |              |              |             |              |             |             |             |
| <b>CI)</b>                                |              |              |              |              |             |              |             |             |             |

558 <sup>a</sup>Results from Roseman et al., 2012.

For peer review only

**Table 3. Factors associated with reporting funding sources of included RCTs**

|                                                                         | <b>Proportion that<br/>reported some or<br/>all declared<br/>funding sources<br/>from included<br/>RCTs</b> | <b>Unadjusted odds<br/>ratio (95% CI)</b> | <b>Adjusted odds ratio<br/>(95% CI)</b> |
|-------------------------------------------------------------------------|-------------------------------------------------------------------------------------------------------------|-------------------------------------------|-----------------------------------------|
| <b>FCOI of meta-analysis<br/>(including meta-analysis<br/>funding)</b>  |                                                                                                             |                                           |                                         |
| reference = no FCOI                                                     | 67/151 (44%)                                                                                                |                                           |                                         |
| Any disclosed FCOI                                                      | 35/51 (69%)                                                                                                 | 2.74 (1.42 to 5.49)                       | 1.29 (0.53 to 3.19)                     |
| Not reported                                                            | 9/48 (19%)                                                                                                  | 0.29 (0.12 to 0.62)                       | 1.18 (0.40 to 3.44)                     |
| <b>Impact Factor and Journal<br/>Type</b>                               |                                                                                                             |                                           |                                         |
| reference = Cochrane                                                    | 90/107 (84%)                                                                                                |                                           |                                         |
| Specialty impact factor $\leq 3^b$                                      | 4/65 (6%)                                                                                                   | 0.01 (< 0.01 to 0.03)                     | 0.01 (< 0.01 to 0.04)                   |
| General (N=31) or<br>Multidisciplinary (N=10)<br>impact factor $\leq 3$ | 4/41 (10%)                                                                                                  | 0.02 (< 0.01 to 0.06)                     | 0.02 (< 0.01 to 0.06)                   |
| Specialty impact factor 3.1 -<br>6.7 <sup>c</sup>                       | 10/27 (37%)                                                                                                 | 0.11 (0.04 to 0.28)                       | 0.11 (0.04 to 0.28)                     |
| Specialty (N=8) or General<br>(N=2) impact factor > 6.8                 | 3/10 (30%)                                                                                                  | 0.08 (0.02 to 0.32)                       | 0.08 (0.02 to 0.32)                     |

1  
2  
3 559 <sup>a</sup>Not reported included meta-analyses for which the presence of FCOI could not be determined  
4 560 because either meta-anlaysis funding, meta-analysis author FCOI, or both were not reported.  
5 561 <sup>b</sup> Two meta-analyses were from journals that did not have an impact factor, and these were coded as having an impact factor of 0.5 for our  
6 562 analyses.  
7 563 <sup>c</sup> There were no multidisciplinary or general medicine journals with an impact factor of 3.1-6.7.  
8 564 FCOI = financial conflicts of interest

9 565

10  
11  
12  
13  
14  
15  
16  
17  
18  
19  
20  
21  
22  
23  
24  
25  
26  
27  
28  
29  
30  
31  
32  
33  
34  
35  
36  
37  
38  
39  
40  
41  
42  
43  
44  
45  
46  
47  
48  
49  
50  
51  
52  
53  
54  
55  
56  
57  
58  
59  
60

For peer review only

1  
2  
3  
4  
5  
6  
7  
8  
9  
10  
11  
12  
13  
14  
15  
16  
17  
18  
19  
20  
21  
22  
23  
24  
25  
26  
27  
28  
29  
30  
31  
32  
33  
34  
35  
36  
37  
38  
39  
40  
41  
42

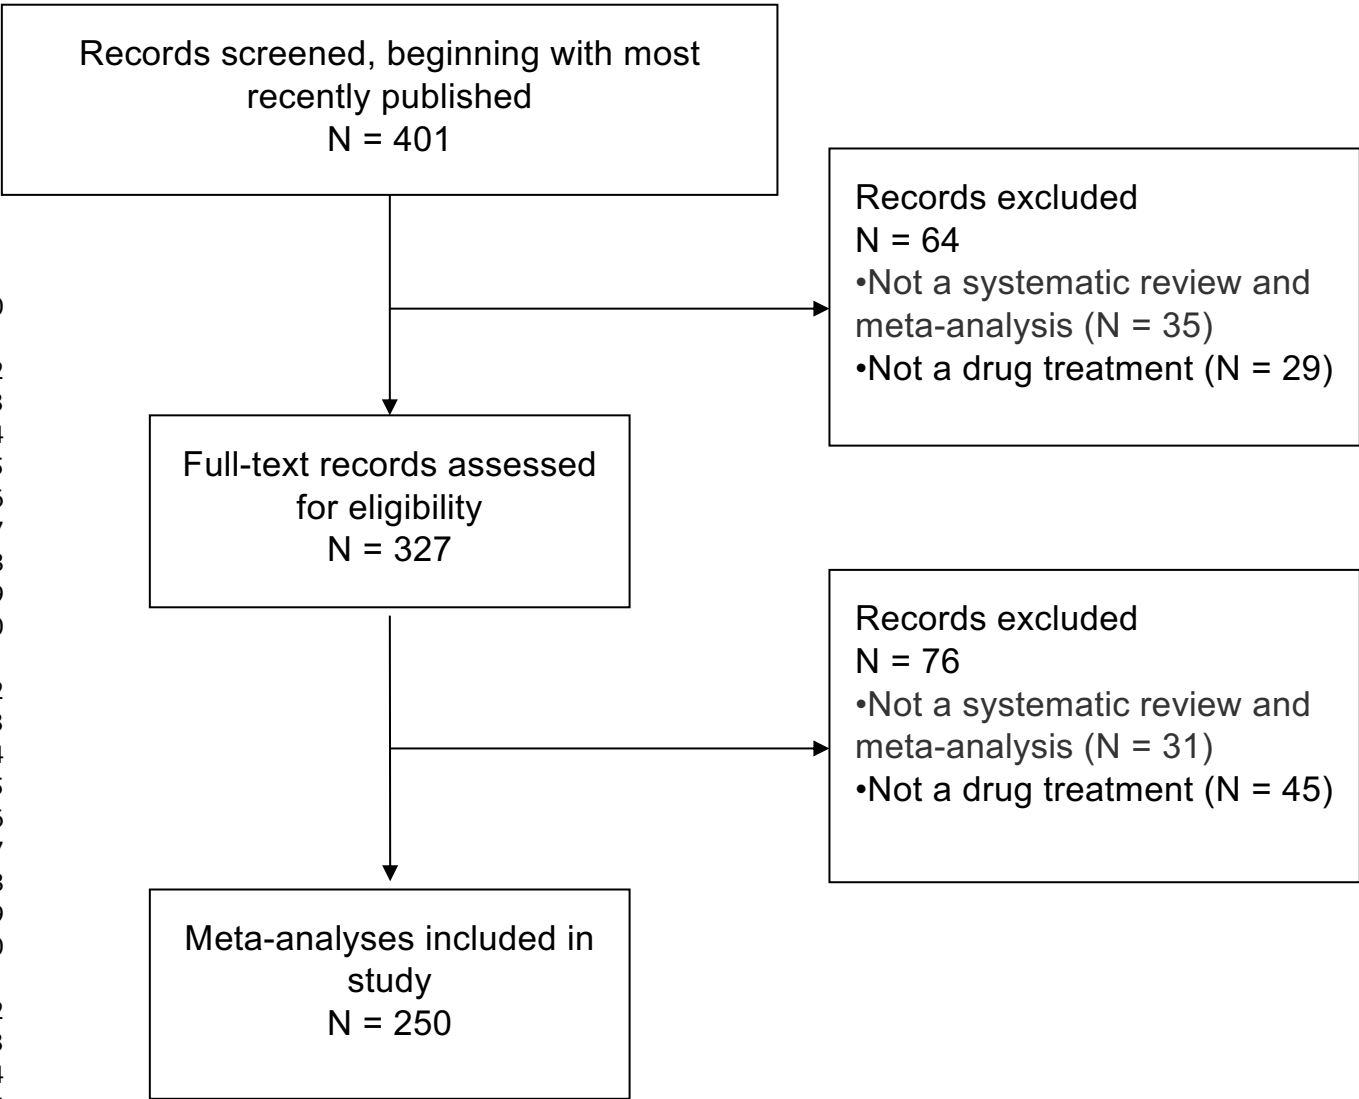

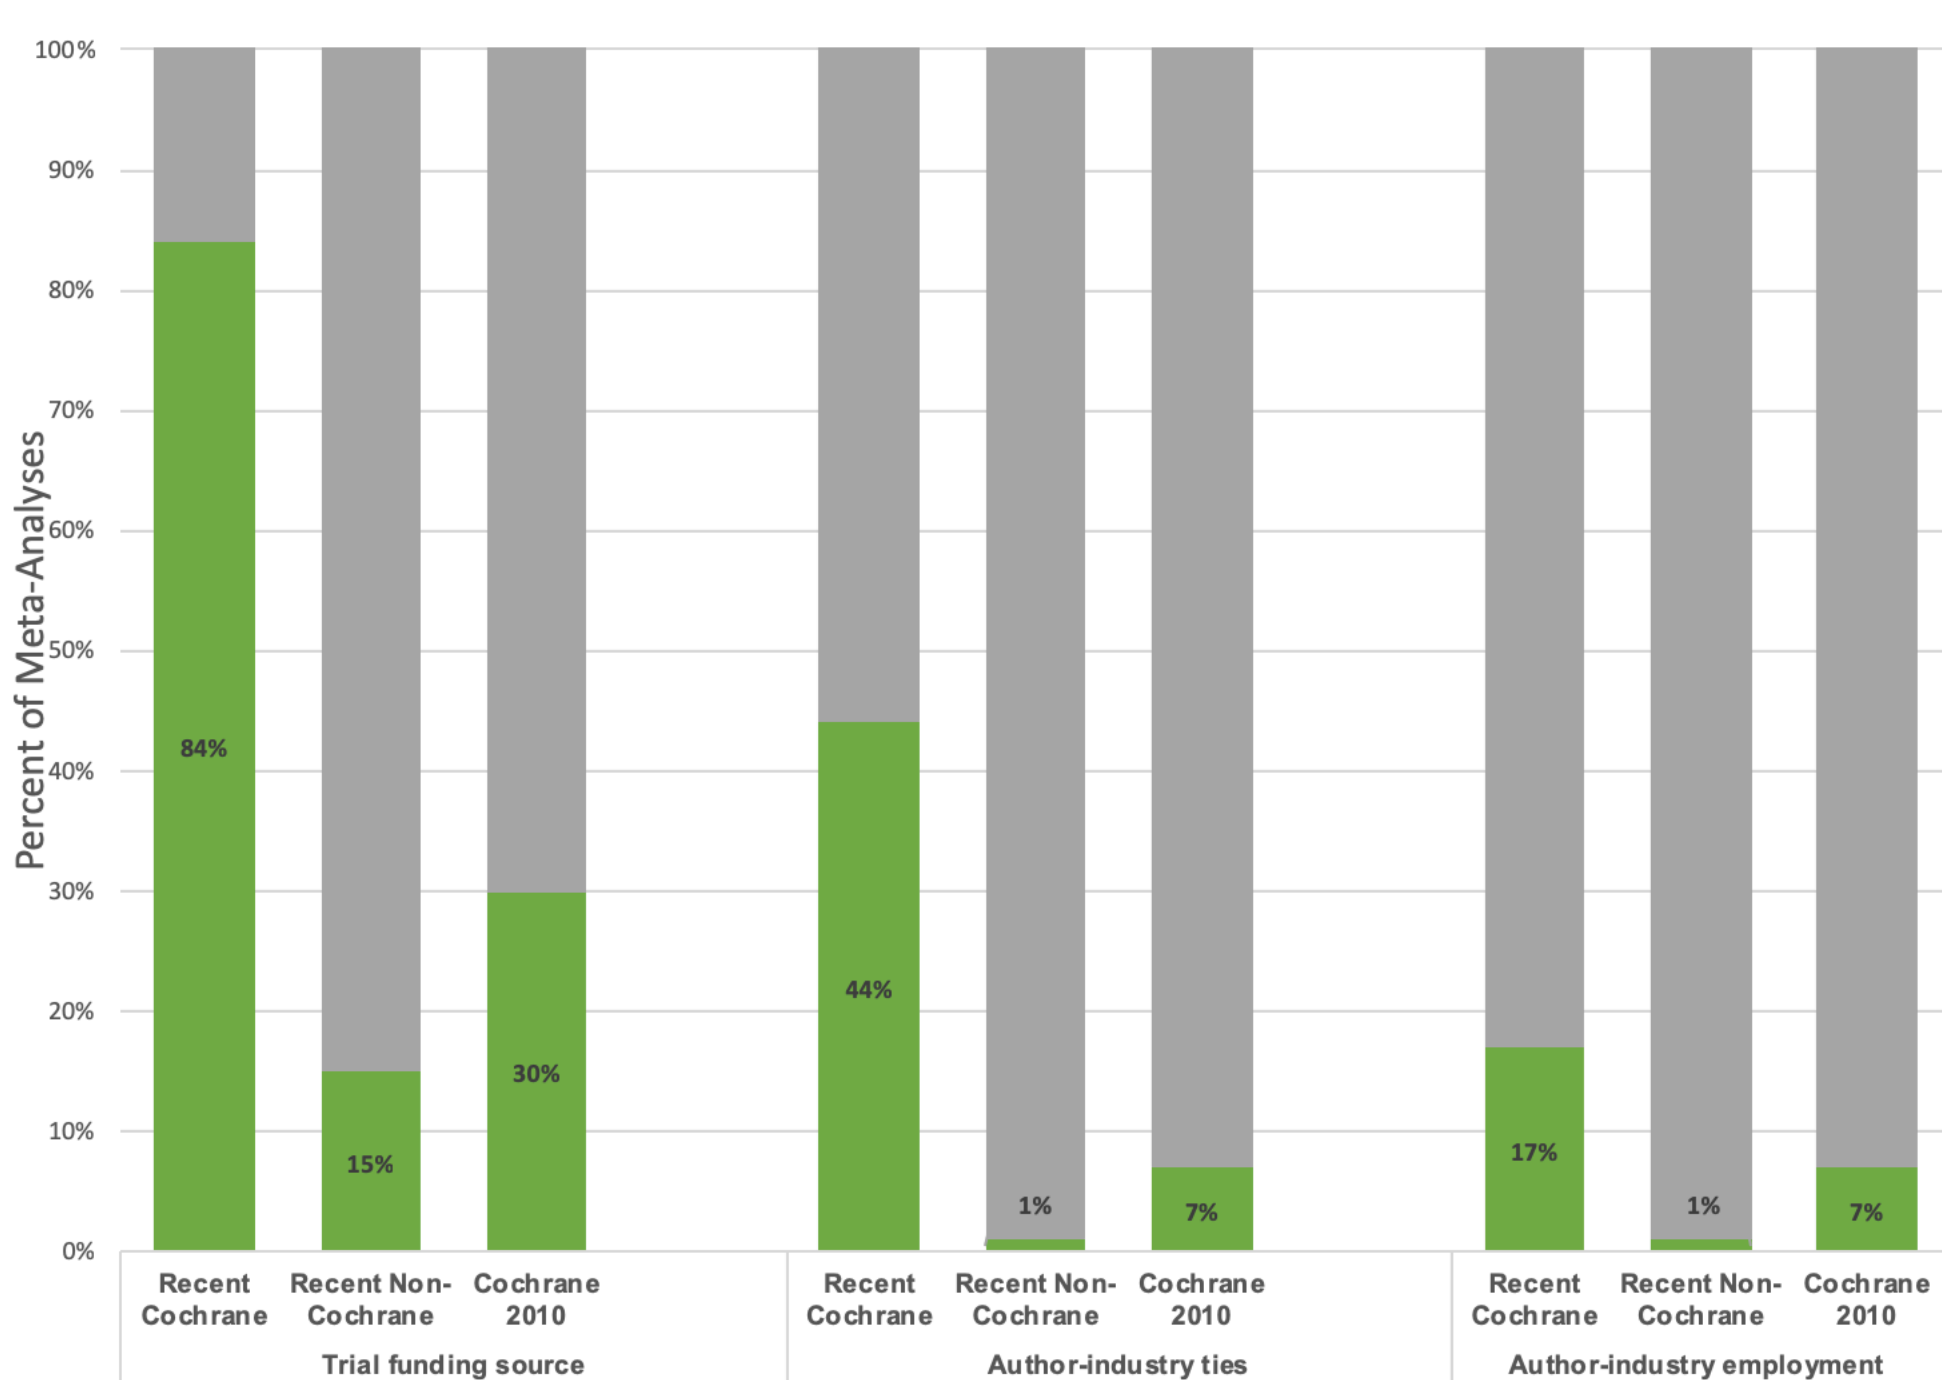

1  
2  
3 **Supplementary Material**  
4  
5  
6  
7

8 **eMethods1.** Search strategy  
9

10 **eMethods2.** Data extraction form  
11

12 **eMethods3.** Power analysis  
13

14 **eTable1.** Detailed characteristics of included meta-analyses  
15

16 **eTable2.** Detailed reporting of study funding source, author-industry financial ties, and author-  
17 industry employment from included RCTs  
18  
19  
20  
21  
22  
23  
24  
25  
26  
27  
28  
29  
30  
31  
32  
33  
34  
35  
36  
37  
38  
39  
40  
41  
42  
43  
44  
45  
46  
47  
48  
49  
50  
51  
52  
53  
54  
55  
56  
57  
58  
59  
60

## eMethods1. Search strategy

To obtain our sample, we searched the MEDLINE database via PubMed on October 19, 2018 using the following search strategy:

```
((("Randomized Controlled Trials as Topic"[Mesh] or randomized control trial [tiab] or randomized controled trial [tiab] OR randomized controlled trial [tiab] or randomized control trials [tiab] OR randomized controled trials [tiab] OR Randomized controlled trials [tiab] or randomised control trial [tiab] or randomised controled trial [tiab] OR randomised controlled trial [tiab] or randomised control trials [tiab] OR randomised controled trials [tiab] OR Randomised controlled trials [tiab]) AND ("Therapeutic Uses"[Mesh] OR "Vaccines"[Mesh]) AND ("Meta-Analysis" [Publication Type] or meta analysis [tiab]) AND (systematic review [tiab] OR search [tiab] or searched [tiab] or MEDLINE [tiab] OR PubMed [tiab])))
```



1  
2  
3 **eMethods 2. Data extraction form**  
4  
5  
6  
7

8 **First Author, last name:** Last name of first author of meta-analysis  
9

10  
11 **Year of publication (or in press):** Year of publication of meta-analysis  
12  
13

14 **Journal:** Name of journal in which meta-analysis was published  
15  
16

17  
18 **Journal Impact factor:** Where meta-analysis published (low-high split or continuous based on  
19 data distribution)  
20  
21

22  
23 **Specialty area of Journal:** Where meta-analysis published (per Thomson Reuters Journal  
24 Science Citation Index - Expanded categories)  
25  
26

27  
28 **Cochrane Review (Y/N):** Is the meta-analysis a Cochrane Review? Select "Yes" even if the  
29 Cochrane Review is being published in another journal  
30  
31

32 Response from radio options:

- 33 - Y (Yes)  
34  
35 - N (No)  
36  
37

38  
39 **Journal policies for reporting COI of Included Trials:** Presence or absence of instructions for  
40 reporting in the author instructions  
41

- 42 - Y (Yes)  
43  
44 - N (No)  
45  
46

47 **# of RCTs synthesized in Meta-Analysis** (total RCTs in included meta-analysis related to  
48 drugs)  
49  
50  
51  
52  
53  
54  
55  
56  
57  
58  
59  
60

1  
2  
3 **Date Range of Included Trials:** Date range in years of publication of studies (RCTs) included  
4 related to drugs in the meta-analysis (XXXX - XXXX). Use "In press" for end date if there are in  
5 press trials. Use "Unpublished" if a trial is in progress or has never been published.  
6  
7  
8  
9

10 **Study population:** Characteristics of study population of included trials (e.g. condition/disorder,  
11 adult/child)  
12  
13

14  
15 **Pharmacological agent:** Pharmacologic treatment evaluated in the meta-analysis

- 16 - Name(s) of treatment if specific drug(s) investigated
- 17 - Class of treatment if broader category of drugs investigated, and number of drugs  
18 evaluated (e.g. SSRIs – 5 included)  
19  
20  
21  
22  
23

24 **Control/comparison arms:** Other treatment arms (control/comparison) included in the meta-  
25 analysis (e.g. placebo, name of comparison pharmacologic treatment, name of behavioral  
26 intervention)  
27  
28  
29

30  
31 **Meta-Analysis Author Financial Ties / Funding Sources Reported:** Does the meta-analysis  
32 report meta-analysis author financial ties (including former and current industry employment)  
33 and/or the funding source? Note that reporting "no funding" is different from not reporting.  
34  
35

36 Response from radio options:

- 37 - Meta-analysis author financial ties
- 38 - Meta-analysis funding sources
- 39 - Both financial ties and funding sources
- 40 - Neither reported  
41  
42  
43  
44  
45

46 **Funding Source of Meta-Analysis (if applicable – only shown if above item indicates meta-  
47 analysis funding sources reported or both financial ties and meta-analysis funding sources  
48 reported)** Source of financial support for the meta-analysis:  
49  
50

51 Response from radio options:

- 52 - Industry
- 53 - Combined industry and non-industry  
54  
55  
56  
57  
58  
59  
60

- Non-industry (e.g. public granting agency, private not-for-profit granting agency)
- No study funding

**Type of Industry Funding (if applicable – only shown if above item indicates industry funding or combined industry and non-industry present):** If the meta-analysis is industry funded, what is the type of support provided by industry? Response from radio options:

- Financial support
- Resources (e.g. statistical analyses)
- Both financial support and resources

**# of Meta-Analysis Authors:** Number of authors of the meta-analysis (count authors named in byline or in an author group)

**# of Meta-Analysis Authors with Financial Ties to Industry (if applicable – only shown if meta-analysis author financial ties or both financial ties and meta-analysis funding sources are reported):** Number of authors of the meta-analysis who have financial ties such as industry board member, consultant, investments, patents, research funding, royalties (including former, and excluding current industry employment):

- Numbers 0 -  $\geq 10$

**# Meta-Analysis Authors with Current Industry Employment (if applicable – only shown if meta-analysis author financial ties or both financial ties and meta-analysis funding sources are reported):** Number of authors of the meta-analysis who are current industry employees.

Response from radio options:

Numbers 0 -  $\geq 10$

**Quality or Risk Assessment of Included RCTs (Y/N):** Was quality or risk assessment of included RCTs, by methods from Cochrane, Jadad, etc., reported in the meta-analysis.

Response from radio options:

- Y (Yes)
- N (No)

1  
2  
3  
4  
5 **Quality or Risk Assessment Method of Included RCTs (if applicable – only shown if**  
6 **answer to previous item is yes- quality or risk assessment of included RCTs is reported):** If  
7 the meta-analysis authors report a quality or risk assessment method of included RCTs, what is  
8 the reported method of quality assessment?  
9  
10  
11  
12

13 **Meta-analysis Authors Report Funding Sources of Included Studies:** Response from radio  
14 options:  
15

- 16 - Reported for each included study
  - 17 - Reported in summary statement or for some, but not all, trials
  - 18 - Included study funding sources not reported
- 19  
20  
21  
22  
23

24 **Placement in publication of Included RCTs' Funding Source** (if applicable – only shown if  
25 the response to Meta-analysis Authors Report Funding Sources of Included Studies is (1)  
26 Reported for Each included Study or (2) Reported in summary statement or for some, but not all,  
27 trials):  
28  
29

- 30 - Abstract
  - 31 - Main text, other than risk of bias or quality section
  - 32 - In risk of bias or quality assessment
  - 33 - Other in main document (e.g., a characteristics of studies table, other table, in a  
34 footnote of a table
  - 35 - Online appendix
  - 36 - Lay Summary
- 37  
38  
39  
40  
41  
42  
43

44 **Placement in risk of bias or quality assessment of Included RCTs' Funding Source** (if  
45 applicable – only shown if placement in publication of included RCT's Funding Source is risk of  
46 bias or quality assessment):  
47  
48

- 49 - Text
  - 50 - Figure/table
  - 51 - Both text and figure/table
- 52  
53  
54  
55  
56  
57  
58  
59  
60

1  
2  
3 **Meta-analysis Authors Report Author Financial Ties of Included Studies:** Response from  
4 radio options:

- 5  
6  
7 - Reported for each included study  
8  
9 - Reported in summary statement or for some, but not all, trials  
10  
11 - Included study author financial ties not reported  
12

13 **Placement in publication of Included RCTs' Author Financial Ties** (if applicable – only  
14 shown if the response Meta-analysis Authors Report Author Financial Ties of Included Studies is  
15 (1) Reported for Each included Study or (2) Reported in summary statement or for some, but not  
16 all, trials):  
17  
18

- 19  
20 - Abstract  
21  
22 - Main text, other than risk of bias or quality section  
23  
24 - In risk of bias or quality assessment  
25  
26 - Other in main document (e.g., a characteristics of studies table, other table, in a  
27 footnote of a table  
28  
29 - Online appendix  
30  
31 - Lay Summary  
32  
33

34 **Placement in risk of bias or quality assessment of Included RCTs' Author Financial Ties** (if  
35 applicable – only shown if placement in publication of included RCT's Author Financial ties is  
36 risk of bias or quality assessment):  
37  
38

- 39 - Text  
40  
41 - Figure/table  
42  
43 - Both text and figure/table  
44  
45

46 **Meta-analysis Authors Report Author Industry Employment of Included Studies:** Do the  
47 authors of the meta-analysis report current author industry affiliation (employment) for the  
48 included studies? Response from radio options:  
49

- 50  
51 - Reported for each included study  
52  
53 - Reported in summary statement or for some, but not all, trials  
54  
55 - Included study author industry employment not reported  
56  
57  
58  
59

1  
2  
3  
4  
5 **Placement in publication of Included RCTs' Author Industry Employment** (if applicable –  
6 only shown if the response to Meta-analysis Authors Report Author Industry Affiliation  
7 (Employment) of Included Studies is (1) Reported for Each included Study or (2) Reported in  
8 summary statement or for some, but not all, trials):  
9

- 10 - Abstract
- 11 - Main text, other than risk of bias or quality section
- 12 - In risk of bias or quality assessment
- 13 - Other in main document (e.g., a characteristics of studies table, other table, in a  
14 footnote of a table)
- 15 - Online appendix
- 16 - Lay Summary

17  
18  
19  
20  
21  
22  
23  
24  
25  
26 **Placement in risk of bias or quality assessment of Included RCTs' Author Industry**  
27 **Employment** (only shown if placement in publication of included RCT's Author Industry  
28 Affiliation is risk of bias or quality assessment):  
29

- 30 - Text
- 31 - Figure/table
- 32 - Both text and figure/table

33  
34  
35  
36  
37  
38 **Do the authors report a PROSPERO registration number in the text?**

- 39 - Yes
- 40 - No

41  
42  
43 **What is the registration number (e.g., CRD42017062454)?** (if applicable – only shown if the  
44 response to Do the authors report a PROSPERO registration number in the text? Is yes)  
45

46  
47  
48 **What stages were completed (ignore started) at the time of registration. Make sure to select**  
49 **the earliest registration version at the bottom of the page. Please check all stages that were**  
50 **completed.** (if applicable – only shown if the response to Do the authors report a PROSPERO  
51 registration number in the text? Is yes)  
52

- 53 - Preliminary searches

- 1
- 2
- 3 - Piloting of the study selection process
- 4
- 5 - Formal screening of search results against eligibility criteria
- 6
- 7 - Data extraction
- 8
- 9 - Risk of bias (quality) assessment
- 10
- 11 - Data analysis
- 12
- 13 - None completed
- 14

15 **Was a registration found in PROSPERO?** (if applicable – only shown if the response to Do  
16 the authors report a PROSPERO registration number in the text? Is no)

17  
18  
19  
20 **What is the registration number (e.g., CRD42017062454)?** (if applicable – only shown if the  
21 response to Was a registration found in PROSPERO? Is yes)

22  
23  
24  
25 **What stages were completed (ignore started) at the time of registration. Make sure to select  
26 the earliest registration version at the bottom of the page. Please check all stages that were  
27 completed.** (if applicable – only shown if the response to Was a registration found in  
28 PROSPERO? Is yes)

- 29
- 30
- 31
- 32 - Preliminary searches
- 33
- 34 - Piloting of the study selection process
- 35
- 36 - Formal screening of search results against eligibility criteria
- 37
- 38 - Data extraction
- 39
- 40 - Risk of bias (quality) assessment
- 41
- 42 - Data analysis
- 43
- 44 - None completed
- 45
- 46
- 47
- 48
- 49
- 50
- 51
- 52
- 53
- 54
- 55
- 56
- 57
- 58
- 59
- 60

1  
2  
3 **eMethods3. Power analysis**  
4  
5  
6

7 **Allocation ratio: 50% and 50% (1:1)**

8 20% difference

| 9 Proportion reporting<br>COI |                   | 10 Sample size<br>group 1 | 11 Sample size<br>group 2 | 12 Sample size<br>total | 13 Actual power | 14 Actual alpha |
|-------------------------------|-------------------|---------------------------|---------------------------|-------------------------|-----------------|-----------------|
| 15 Low impact                 | 16 High<br>impact |                           |                           |                         |                 |                 |
| 17 10%                        | 18 30%            | 19 69                     | 20 69                     | 21 138                  | 22 .807         | 23 .033         |
| 24 20%                        | 25 40%            | 26 90                     | 27 90                     | 28 180                  | 29 .802         | 30 .037         |
| 31 30%                        | 32 50%            | 33 102                    | 34 102                    | 35 204                  | 36 .806         | 37 .042         |
| 38 40%                        | 39 60%            | 40 102                    | 41 102                    | 42 204                  | 43 .801         | 44 .038         |
| 45 50%                        | 46 70%            | 47 102                    | 48 102                    | 49 204                  | 50 .806         | 51 .036         |
| 52 60%                        | 53 80%            | 54 90                     | 55 90                     | 56 180                  | 57 .802         | 58 .032         |
| 59 70%                        | 60 90%            | 61 69                     | 62 69                     | 63 138                  | 64 .807         | 65 .025         |

66 **Allocation ratio: 30% and 70% (3:7)**

67 20% difference

| 68 Proportion reporting<br>COI |                   | 69 Sample size<br>group 1 | 70 Sample size<br>group 2 | 71 Sample size<br>total | 72 Actual power | 73 Actual alpha |
|--------------------------------|-------------------|---------------------------|---------------------------|-------------------------|-----------------|-----------------|
| 74 Low impact                  | 75 High<br>impact |                           |                           |                         |                 |                 |
| 76 10%                         | 77 30%            | 78 105                    | 79 44                     | 80 149                  | 81 .815         | 82 .038         |
| 83 20%                         | 84 40%            | 85 141                    | 86 59                     | 87 200                  | 88 .807         | 89 .040         |
| 90 30%                         | 91 50%            | 92 165                    | 93 69                     | 94 234                  | 95 .801         | 96 .045         |
| 97 40%                         | 98 60%            | 99 168                    | 100 71                    | 101 239                 | 102 .805        | 103 .043        |
| 104 50%                        | 105 70%           | 106 166                   | 107 70                    | 108 236                 | 109 .864        | 110 .042        |
| 111 60%                        | 112 80%           | 113 148                   | 114 62                    | 115 210                 | 116 .802        | 117 .040        |
| 118 70%                        | 119 90%           | 120 133                   | 121 47                    | 122 160                 | 123 .802        | 124 .035        |



eTable1. Detailed characteristics of included meta-analyses

eTable1. Detailed characteristics of included meta-analyses

| First Author                      | Year | Journal                                 | 2017 Impact Factor | Specialty Area               | Meta-analysis Funding source(s) | Number of Meta-analysis Authors with Industry Financial Ties / Number of Meta-analysis Authors <sup>a</sup> | Number of drug RCTs Included | Publication Dates of included drug RCTs | Population                                                                  | Drug Intervention(s)                                                                                                                  | Comparison Arm(s)                                               |
|-----------------------------------|------|-----------------------------------------|--------------------|------------------------------|---------------------------------|-------------------------------------------------------------------------------------------------------------|------------------------------|-----------------------------------------|-----------------------------------------------------------------------------|---------------------------------------------------------------------------------------------------------------------------------------|-----------------------------------------------------------------|
| <b>Cochrane Reviews (n = 107)</b> |      |                                         |                    |                              |                                 |                                                                                                             |                              |                                         |                                                                             |                                                                                                                                       |                                                                 |
| Abdel-Rahman <sup>1</sup>         | 2018 | Cochrane Database of Systematic Reviews | 6.8                | Medicine, General & Internal | Non-industry                    | 0/3                                                                                                         | 7                            | 2004-2016                               | Adults (19 years and over) with advanced biliary tract carcinomas           | Gemcitabine, vandetanib, S-1 (tegafur + gimeracil + oteracil), gemcitabine + oxaliplatin, 5-fluorouracil + folinic acid, capecitabine | Best supportive care, 5-fluorouracil + cisplatin + radiotherapy |
| Adams <sup>2</sup>                | 2018 | Cochrane Database of Systematic Reviews | 6.8                | Medicine, General & Internal | Non-industry                    | 0/4                                                                                                         | 36                           | 1994-2012                               | Participants with or without evidence of cardiovascular disease             | Fluvastatin                                                                                                                           | Placebo                                                         |
| Agabio <sup>3</sup>               | 2018 | Cochrane Database of Systematic Reviews | 6.8                | Medicine, General & Internal | Non-industry                    | 0/3                                                                                                         | 27                           | 1969-2015                               | People with co-occurring depression and alcohol dependence                  | Antidepressants - 16 types, diazepam, memantine                                                                                       | Placebo, psychotherapy                                          |
| Al-Shahi Salman <sup>4</sup>      | 2018 | Cochrane Database of Systematic Reviews | 6.8                | Medicine, General & Internal | Not reported                    | 0/5                                                                                                         | 11 <sup>b</sup>              | 1999-2015                               | Adults (16 years and over) with acute spontaneous intracerebral haemorrhage | Blood clotting factors, antifibrinolytic drugs                                                                                        | Placebo, open control, fresh frozen plasma                      |
| Alabed <sup>5</sup>               | 2018 | Cochrane Database of Systematic Reviews | 6.8                | Medicine, General & Internal | Non-industry                    | 0/4                                                                                                         | 11                           | 1976-2008                               | Patients with antipsychotic-induced tardive dyskinesia (TD)                 | Gamma-aminobutyric acid agonists - 6 types                                                                                            | Placebo                                                         |
| Allegretti <sup>6</sup>           | 2017 | Cochrane Database of Systematic Reviews | 6.8                | Medicine, General & Internal | No funding                      | 3/8                                                                                                         | 8                            | 1998-2016                               | Patients with hepatorenal syndrome                                          | Terlipressin, terlipressin + albumin                                                                                                  | Placebo, no intervention, albumin                               |
| Arechabala <sup>7</sup>           | 2018 | Cochrane Database of Systematic Reviews | 6.8                | Medicine, General & Internal | Non-industry                    | 0/7                                                                                                         | 37                           | 1998-2017                               | Patients undergoing haemodialysis using a central venous catheter           | Antibiotic antimicrobial lock solutions - 11 types, non-antibiotic antimicrobial lock                                                 | Heparin, saline                                                 |

1  
2  
3  
4  
5  
6  
7  
8  
9  
10  
11  
12  
13  
14  
15  
16  
17  
18  
19  
20  
21  
22  
23  
24  
25  
26  
27  
28  
29  
30  
31  
32  
33  
34  
35  
36  
37  
38  
39  
40  
41  
42  
43  
44  
45  
46  
47

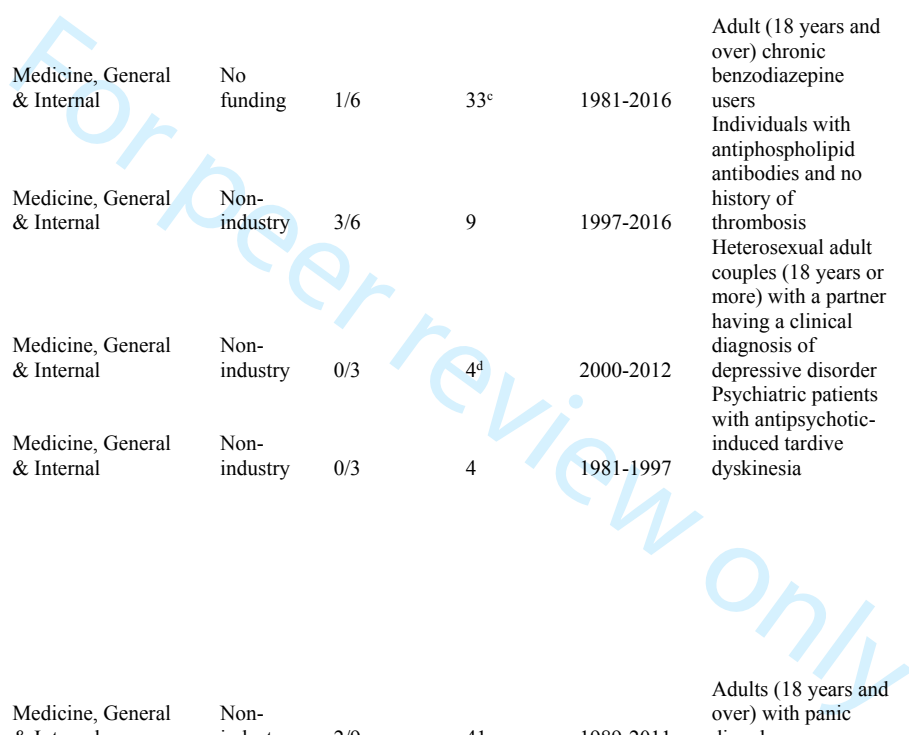

|                        |      |                                         |     |                              |              |     |                 |           |                                                                                                                 |                                                                                                                                                                                                                                                                               |                                                      |
|------------------------|------|-----------------------------------------|-----|------------------------------|--------------|-----|-----------------|-----------|-----------------------------------------------------------------------------------------------------------------|-------------------------------------------------------------------------------------------------------------------------------------------------------------------------------------------------------------------------------------------------------------------------------|------------------------------------------------------|
|                        |      |                                         |     |                              |              |     |                 |           |                                                                                                                 | solutions - 10 types, antibiotic + non-antibiotic antimicrobial lock solutions - 3 types                                                                                                                                                                                      |                                                      |
|                        |      |                                         |     |                              |              |     |                 |           |                                                                                                                 | Valproate, carbamazepine, lithium, pregabalin, captodiame, paroxetine, tricyclic antidepressants - 4 types, alpidem, buspirone, flumazenil, propranolol, progesterone, magnesium aspartate, bromazepam, cyamemazine, zopiclone, flunitrazepam                                 | Placebo, no intervention                             |
| Baandrup <sup>8</sup>  | 2018 | Cochrane Database of Systematic Reviews | 6.8 | Medicine, General & Internal | No funding   | 1/6 | 33 <sup>c</sup> | 1981-2016 | Adult (18 years and over) chronic benzodiazepine users                                                          |                                                                                                                                                                                                                                                                               |                                                      |
| Bala <sup>9</sup>      | 2018 | Cochrane Database of Systematic Reviews | 6.8 | Medicine, General & Internal | Non-industry | 3/6 | 9               | 1997-2016 | Individuals with antiphospholipid antibodies and no history of thrombosis                                       | Aspirin + anticoagulants, aspirin, aspirin + low molecular weight heparin                                                                                                                                                                                                     | Placebo, immunoglobulin, unfractionated heparin      |
| Barbato <sup>10</sup>  | 2018 | Cochrane Database of Systematic Reviews | 6.8 | Medicine, General & Internal | Non-industry | 0/3 | 4 <sup>d</sup>  | 2000-2012 | Heterosexual adult couples (18 years or more) with a partner having a clinical diagnosis of depressive disorder | Antidepressants - 9 types                                                                                                                                                                                                                                                     | Couples therapy                                      |
| Bergman <sup>11</sup>  | 2018 | Cochrane Database of Systematic Reviews | 6.8 | Medicine, General & Internal | Non-industry | 0/3 | 4               | 1981-1997 | Psychiatric patients with antipsychotic-induced tardive dyskinesia                                              | Benzodiazepines - 3 types<br>Tricyclic antidepressants (TCAs), selective serotonin reuptake inhibitors (SSRIs), monoamine oxidase inhibitors (MAOIs), serotonin-norepinephrine reuptake inhibitors (SNRIs), norepinephrine reuptake inhibitors (NRIs), nefazodone, ritanserin | Placebo, usual care                                  |
| Bighelli <sup>12</sup> | 2018 | Cochrane Database of Systematic Reviews | 6.8 | Medicine, General & Internal | Non-industry | 2/9 | 41              | 1989-2011 | Adults (18 years and over) with panic disorder                                                                  |                                                                                                                                                                                                                                                                               | Placebo                                              |
| Birks <sup>13</sup>    | 2018 | Cochrane Database of Systematic Reviews | 6.8 | Medicine, General & Internal | Non-industry | 0/2 | 30              | 1996-2017 | People with Alzheimer's disease                                                                                 | Donepezil                                                                                                                                                                                                                                                                     | Placebo                                              |
| Boyapati <sup>14</sup> | 2018 | Cochrane Database of Systematic Reviews | 6.8 | Medicine, General & Internal | Non-industry | 3/8 | 6               | 1978-2017 | Adults (18 years and over) with quiescent Crohn's disease                                                       | Azathioprine, infliximab                                                                                                                                                                                                                                                      | No treatment, usual care (azathioprine + infliximab) |

|    |                            |      |             |     |                   |          |                  |                 |           |                       |                             |                        |
|----|----------------------------|------|-------------|-----|-------------------|----------|------------------|-----------------|-----------|-----------------------|-----------------------------|------------------------|
| 1  |                            |      |             |     |                   |          |                  |                 |           |                       |                             |                        |
| 2  |                            |      |             |     |                   |          |                  |                 |           |                       |                             |                        |
| 3  |                            |      | Cochrane    |     |                   |          |                  |                 |           |                       |                             |                        |
| 4  |                            |      | Database of |     |                   |          |                  |                 | Women of  |                       |                             |                        |
| 5  | Brown <sup>15</sup>        | 2018 | Systematic  | 6.8 | Medicine, General | Non-     | 0/4              | 5               | 1993-2017 | reproductive age      | Combined oral contraceptive | Placebo, leuprolide,   |
| 6  |                            |      | Reviews     |     | & Internal        | industry |                  |                 |           | with endometriosis    | pill - 3 types              | goserelin              |
| 7  |                            |      | Cochrane    |     |                   |          |                  |                 |           |                       |                             |                        |
| 8  | Bruins Slot <sup>16</sup>  | 2018 | Database of | 6.8 | Medicine, General | Non-     | 1/2 <sup>e</sup> | 13              | 2008-2014 | Adults with atrial    | Factor Xa inhibitors - 7    | Warfarin               |
| 9  |                            |      | Systematic  |     | & Internal        | industry |                  |                 |           | fibrillation          | types                       |                        |
| 10 |                            |      | Reviews     |     |                   |          |                  |                 |           | People with           |                             |                        |
| 11 |                            |      |             |     |                   |          |                  |                 |           | schizophrenia and     |                             |                        |
| 12 |                            |      |             |     |                   |          |                  |                 |           | schizophrenia-like    |                             |                        |
| 13 |                            |      |             |     |                   |          |                  |                 |           | disorders such as     |                             |                        |
| 14 |                            |      | Cochrane    |     |                   |          |                  |                 |           | schizophreniform      |                             |                        |
| 15 | Bryan <sup>17</sup>        | 2017 | Database of | 6.8 | Medicine, General | No       | 0/3              | 20              | 1968-2007 | disorder, or          | Zuclophenthixol             | Placebo, other drugs - |
| 16 |                            |      | Systematic  |     | & Internal        | funding  |                  |                 |           | schizoaffective       | dihydrochloride             | 11 types               |
| 17 |                            |      | Reviews     |     |                   |          |                  |                 |           | disorder              | Antifibrinolytic agents - 2 |                        |
| 18 |                            |      |             |     |                   |          |                  |                 |           |                       | types, non-steroidal anti-  | Placebo, herbal        |
| 19 | Bryant-Smith <sup>18</sup> | 2018 | Database of | 6.8 | Medicine, General | No       | 1/4              | 13              | 1970-2016 | Women of              | inflammatory drugs          | medicines,             |
| 20 |                            |      | Systematic  |     | & Internal        | funding  |                  |                 |           | reproductive age      | (NSAIDs), progestogens,     | levonorgestrel         |
| 21 |                            |      | Reviews     |     |                   |          |                  |                 |           | with heavy            | ethamsylate                 | intrauterine system    |
| 22 |                            |      |             |     |                   |          |                  |                 |           | menstrual bleeding    |                             |                        |
| 23 | Burry <sup>19</sup>        | 2018 | Database of | 6.8 | Medicine, General | Non-     | 0/9              | 9               | 1996-2016 | Adults (17 years and  | Antipsychotics - 5 types    | Nonantipsychotics,     |
| 24 |                            |      | Systematic  |     | & Internal        | industry |                  |                 |           | over) in non-ICU      |                             | placebo                |
| 25 |                            |      | Reviews     |     |                   |          |                  |                 |           | acute care settings   |                             |                        |
| 26 | Campschroer <sup>20</sup>  | 2018 | Database of | 6.8 | Medicine, General | Non-     | 0/4              | 67              | 2002-2017 | diagnosed with        | Alpha-blockers - 6 types    | Placebo, usual care    |
| 27 |                            |      | Systematic  |     | & Internal        | industry |                  |                 |           | delirium              |                             |                        |
| 28 |                            |      | Reviews     |     |                   |          |                  |                 |           | Adult patients (18    |                             |                        |
| 29 |                            |      |             |     |                   |          |                  |                 |           | years and older)      |                             |                        |
| 30 | Candy <sup>21</sup>        | 2018 | Database of | 6.8 | Medicine, General | Non-     | 0/5              | 8               | 1996-2017 | with ureteral stone   | Mu-opioid antagonists - 3   | Placebo                |
| 31 |                            |      | Systematic  |     | & Internal        | industry |                  |                 |           | disease               | types                       |                        |
| 32 |                            |      | Reviews     |     |                   |          |                  |                 |           | Adults with cancer    |                             |                        |
| 33 | Chiew <sup>22</sup>        | 2018 | Database of | 6.8 | Medicine, General | Non-     | 0/4              | 9 <sup>f</sup>  | 1976-2014 | and adults receiving  | Methionine, cysteamine,     | Placebo, no treatment  |
| 34 |                            |      | Systematic  |     | & Internal        | industry |                  |                 |           | palliative care with  | dimercaprol, acetylcysteine |                        |
| 35 |                            |      | Reviews     |     |                   |          |                  |                 |           | opioid-induced        |                             |                        |
| 36 |                            |      |             |     |                   |          |                  |                 |           | bowel dysfunction     |                             |                        |
| 37 | Das <sup>23</sup>          | 2018 | Database of | 6.8 | Medicine, General | Not      | 0/3              | 7               | 2010-2017 | Patients with         | Vitamin D                   | Placebo, antibiotics   |
| 38 |                            |      | Systematic  |     | & Internal        | reported |                  |                 |           | paracetamol           |                             | alone                  |
| 39 |                            |      | Reviews     |     |                   |          |                  |                 |           | (acetaminophen)       |                             |                        |
| 40 | Demicheli <sup>24</sup>    | 2018 | Database of | 6.8 | Medicine, General | Non-     | 1/5              | 71 <sup>g</sup> | 1969-2014 | overdose              | Inactivated parenteral      | Placebo, no treatment  |
| 41 |                            |      | Systematic  |     | & Internal        | industry |                  |                 |           | Children aged up to   | influenza vaccine           |                        |
| 42 |                            |      | Reviews     |     |                   |          |                  |                 |           | five years with a     |                             |                        |
| 43 |                            |      |             |     |                   |          |                  |                 |           | clinical diagnosis of |                             |                        |
| 44 |                            |      |             |     |                   |          |                  |                 |           | community-acquired    |                             |                        |
| 45 |                            |      |             |     |                   |          |                  |                 |           | pneumonia (CAP)       |                             |                        |
| 46 |                            |      |             |     |                   |          |                  |                 |           | Healthy individuals   |                             |                        |
| 47 |                            |      |             |     |                   |          |                  |                 |           | (16 to 65 years) and  |                             |                        |
|    |                            |      |             |     |                   |          |                  |                 |           | pregnant women and    |                             |                        |
|    |                            |      |             |     |                   |          |                  |                 |           | their newborns        |                             |                        |

|    |                            |      |             |     |                   |          |     |    |           |                       |                             |                        |
|----|----------------------------|------|-------------|-----|-------------------|----------|-----|----|-----------|-----------------------|-----------------------------|------------------------|
| 1  |                            |      |             |     |                   |          |     |    |           |                       |                             |                        |
| 2  |                            |      |             |     |                   |          |     |    |           |                       |                             |                        |
| 3  |                            |      | Cochrane    |     |                   |          |     |    |           |                       |                             |                        |
| 4  |                            |      | Database of |     |                   |          |     |    |           |                       |                             |                        |
| 5  | Demicheli <sup>25</sup>    | 2018 | Systematic  | 6.8 | Medicine, General | Non-     | 1/7 | 8  | 1969-2004 | Elderly participants  | Influenza vaccines          | Placebo                |
| 6  |                            |      | Reviews     |     | & Internal        | industry |     |    |           | (65 years and over)   | Fondaparinux,               |                        |
| 7  |                            |      |             |     |                   |          |     |    |           |                       | rivaroxaban, low molecular  |                        |
| 8  |                            |      |             |     |                   |          |     |    |           |                       | weight heparin, non-        |                        |
| 9  |                            |      |             |     |                   |          |     |    |           |                       | steroidal anti-inflammatory |                        |
| 10 |                            |      |             |     |                   |          |     |    |           |                       | drugs, vasotonin,           |                        |
| 11 |                            |      |             |     |                   |          |     |    |           |                       | sulodexide,                 |                        |
| 12 |                            |      | Cochrane    |     |                   |          |     |    |           |                       | heparansulphate, vitamin K  |                        |
| 13 |                            |      | Database of |     |                   |          |     |    |           |                       | antagonists, enzyme         |                        |
| 14 | Di Nisio <sup>26</sup>     | 2018 | Systematic  | 6.8 | Medicine, General | Non-     | 2/3 | 32 | 1970-2017 | Patients with         | heparin, heparin calcium,   | Placebo, elastic       |
| 15 |                            |      | Reviews     |     | & Internal        | industry |     |    |           | superficial           | defibrotide                 | stockings              |
| 16 |                            |      | Cochrane    |     |                   |          |     |    |           |                       |                             |                        |
| 17 | El-Sayeh <sup>27</sup>     | 2018 | Database of | 6.8 | Medicine, General | Non-     | 0/4 | 10 | 1973-2010 | antipsychotic-        | Noradrenergic drugs - 2     | Placebo                |
| 18 |                            |      | Systematic  |     | & Internal        | industry |     |    |           | induced tardive       | types, dopaminergic drugs   |                        |
| 19 |                            |      | Reviews     |     |                   |          |     |    |           | dyskinesia            | - 7 types                   |                        |
| 20 |                            |      |             |     |                   |          |     |    |           | People of all ages on |                             |                        |
| 21 |                            |      |             |     |                   |          |     |    |           | continuous vitamin    |                             |                        |
| 22 |                            |      | Cochrane    |     |                   |          |     |    |           | K antagonist (VKA)    |                             |                        |
| 23 | Engelen <sup>28</sup>      | 2018 | Database of | 6.8 | Medicine, General | Non-     | 0/5 | 3  | 1989-2015 | or direct oral        |                             | Usual care (surgical   |
| 24 |                            |      | Systematic  |     | & Internal        | industry |     |    |           | anticoagulant         | Antifibrinolytic agents - 2 | treatment), usual care |
| 25 |                            |      | Reviews     |     |                   |          |     |    |           | (DOAC) treatment      | types                       | (surgical treatment) + |
| 26 |                            |      |             |     |                   |          |     |    |           | undergoing an oral    | Selective serotonin         | placebo                |
| 27 | Eshun-Wilson <sup>29</sup> | 2018 | Database of | 6.8 | Medicine, General | Non-     | 1/6 | 10 | 1994-2014 | or dental procedure   | reuptake inhibitors (SSRIs) |                        |
| 28 |                            |      | Systematic  |     | & Internal        | industry |     |    |           |                       | - 4 types, tricyclic        | Placebo, mirtazapine   |
| 29 |                            |      | Reviews     |     |                   |          |     |    |           | Adults (18 years and  | antidepressants (TCAs) - 2  |                        |
| 30 | Essali <sup>30</sup>       | 2018 | Cochrane    | 6.8 | Medicine, General | Non-     | 0/4 | 3  | 1992-1997 | over) living with     | types                       |                        |
| 31 |                            |      | Database of |     | & Internal        | industry |     |    |           | HIV and depression    |                             |                        |
| 32 |                            |      | Systematic  |     |                   |          |     |    |           | People with           | Calcium channel blockers -  | Placebo                |
| 33 |                            |      | Reviews     |     |                   |          |     |    |           | antipsychotic-        | 3 types                     |                        |
| 34 | Everitt <sup>31</sup>      | 2018 | Database of | 6.8 | Medicine, General | Non-     | 3/8 | 23 | 1978-2013 | induced tardive       | Selective serotonin         | Placebo, insomnia      |
| 35 |                            |      | Systematic  |     | & Internal        | industry |     |    |           | dyskinesia            | reuptake inhibitors - 4     | medication - 2 types   |
| 36 |                            |      | Reviews     |     |                   |          |     |    |           | People (18 years and  | types; tricyclic            |                        |
| 37 | Fanshawe <sup>32</sup>     | 2017 | Cochrane    | 6.8 | Medicine, General | Non-     | 0/6 | 4  | 2004-2014 | over) with insomnia   | antidepressants - 3 types;  |                        |
| 38 |                            |      | Database of |     | & Internal        | industry |     |    |           | Regular tobacco       | other antidepressants - 6   | Placebo                |
| 39 |                            |      | Systematic  |     |                   |          |     |    |           | smokers (20 years     | types                       | Placebo, selective     |
| 40 | Franik <sup>33</sup>       | 2018 | Reviews     | 6.8 | Medicine, General | Non-     | 0/5 | 42 | 2004-2017 | and under)            | Nicotine replacement        | estrogen receptor      |
| 41 |                            |      | Cochrane    |     | & Internal        | industry |     |    |           | Subfertile women of   | therapy, bupropion          | modulators,            |
| 42 |                            |      | Database of |     |                   |          |     |    |           | reproductive age      |                             | clomiphene citrate     |
| 43 |                            |      | Systematic  |     |                   |          |     |    |           | with polycystic       |                             |                        |
| 44 |                            |      | Reviews     |     |                   |          |     |    |           | ovary syndrome        | Letrozole                   |                        |
| 45 |                            |      |             |     |                   |          |     |    |           |                       |                             |                        |
| 46 |                            |      |             |     |                   |          |     |    |           |                       |                             |                        |
| 47 |                            |      |             |     |                   |          |     |    |           |                       |                             |                        |

1  
2  
3  
4  
5  
6  
7  
8  
9  
10  
11  
12  
13  
14  
15  
16  
17  
18  
19  
20  
21  
22  
23  
24  
25  
26  
27  
28  
29  
30  
31  
32  
33  
34  
35  
36  
37  
38  
39  
40  
41  
42  
43  
44  
45  
46  
47

|                              |      |                                         |     |                              |              |      |                 |                   |                                                                                                                      |                                                           |                                                                                                                                                |
|------------------------------|------|-----------------------------------------|-----|------------------------------|--------------|------|-----------------|-------------------|----------------------------------------------------------------------------------------------------------------------|-----------------------------------------------------------|------------------------------------------------------------------------------------------------------------------------------------------------|
|                              |      |                                         |     |                              |              |      |                 |                   |                                                                                                                      |                                                           | followed by intrauterine insemination, laparoscopic ovarian drilling, follicle-stimulating hormone, anastrozole                                |
| González <sup>34</sup>       | 2018 | Cochrane Database of Systematic Reviews | 6.8 | Medicine, General & Internal | Non-industry | 0/6  | 6               | 1994-2014         | Pregnant women living in malaria-endemic areas                                                                       | Mefloquine                                                | Sulfadoxine-pyrimethamine, cotrimoxazole, placebo                                                                                              |
| Grabosch <sup>35</sup>       | 2018 | Cochrane Database of Systematic Reviews | 6.8 | Medicine, General & Internal | Non-industry | 0/3  | 3               | 2006-2017         | Adult women with moderate or severe cervical intraepithelial neoplasia (CIN)                                         | Non-steroidal anti-inflammatory agents (NSAIDs) - 2 types | Placebo                                                                                                                                        |
| Graves <sup>36</sup>         | 2018 | Cochrane Database of Systematic Reviews | 6.8 | Medicine, General & Internal | Non-industry | 0/4  | 24 <sup>b</sup> | 1981-2017         | Adults and children being treated for falciparum malaria                                                             | Primaquine                                                | Usual treatment, bulaquine                                                                                                                     |
| Haas <sup>37</sup>           | 2018 | Cochrane Database of Systematic Reviews | 6.8 | Medicine, General & Internal | Non-industry | 0/4  | 11              | 1997-2017         | Pregnant women who were about to receive a cesarean delivery                                                         | Antiseptic solutions - 3 types                            | Placebo, no treatment                                                                                                                          |
| Hakoum <sup>38</sup>         | 2018 | Cochrane Database of Systematic Reviews | 6.8 | Medicine, General & Internal | Non-industry | 0/10 | 15              | 1991-2009         | People with cancer and venous thromboembolism                                                                        | Low molecular weight heparin, unfractionated heparin      | Fondaparinux<br>Placebo, no treatment, alternative therapies - 7 types, other drug comparators - 6 types, other non-drug comparators - 4 types |
| Heras-Mosteiro <sup>39</sup> | 2017 | Cochrane Database of Systematic Reviews | 6.8 | Medicine, General & Internal | Non-industry | 0/10 | 89              | 1990-2015         | Immunocompetent patients with localised Old World cutaneous leishmaniasis                                            | Antimonials – 2 types, non-antimonials – 22 types         | Chemotherapy, targeted therapy, EGFR-targeting agents, cetuximab, ramucirumab                                                                  |
| Janmaat <sup>40</sup>        | 2017 | Cochrane Database of Systematic Reviews | 6.8 | Medicine, General & Internal | Non-industry | 0/8  | 41              | 1980-2015         | People with esophageal or gastroesophageal junction cancer                                                           |                                                           | Best supportive care, unspecified control                                                                                                      |
| Jefferson <sup>41</sup>      | 2018 | Cochrane Database of Systematic Reviews | 6.8 | Medicine, General & Internal | Non-industry | 1/4  | 41              | 1971-2016         | Healthy children (15 years and under)                                                                                | Influenza vaccine - 2 types                               | Placebo, no intervention                                                                                                                       |
| Jung <sup>42</sup>           | 2017 | Cochrane Database of Systematic Reviews | 6.8 | Medicine, General & Internal | Non-industry | 0/6  | 19              | 2006- Unpublished | Middle-aged and older men (40 or over) with lower urinary tract symptoms as a result of benign prostatic hyperplasia | Sildenafil, tamsulosin, naftopidil, and alfuzosin         | Placebo                                                                                                                                        |

|    |                        |      |             |     |                   |          |      |    |           |                      |                             |                       |
|----|------------------------|------|-------------|-----|-------------------|----------|------|----|-----------|----------------------|-----------------------------|-----------------------|
| 1  |                        |      |             |     |                   |          |      |    |           |                      |                             |                       |
| 2  |                        |      |             |     |                   |          |      |    |           |                      |                             |                       |
| 3  |                        |      | Cochrane    |     |                   |          |      |    |           |                      |                             |                       |
| 4  |                        |      | Database of |     |                   |          |      |    |           |                      |                             |                       |
| 5  | Kaempfen <sup>43</sup> | 2018 | Systematic  | 6.8 | Medicine, General | Non-     | 0/4  | 3  | 2013-2017 | Preterm infants      | Propranolol                 | Placebo, no treatment |
| 6  |                        |      | Reviews     |     | & Internal        | industry |      |    |           |                      |                             |                       |
| 7  |                        |      | Cochrane    |     |                   |          |      |    |           |                      |                             |                       |
| 8  |                        |      | Database of |     |                   |          |      |    |           |                      |                             |                       |
| 9  | Kahale <sup>44</sup>   | 2017 | Systematic  | 6.8 | Medicine, General | Non-     | 0/10 | 7  | 1979-2012 | Ambulatory people    | Warfarin, apixaban          | Placebo, no treatment |
| 10 |                        |      | Reviews     |     | & Internal        | industry |      |    |           | with cancer          |                             |                       |
| 11 |                        |      | Cochrane    |     |                   |          |      |    |           |                      |                             |                       |
| 12 |                        |      | Database of |     |                   |          |      |    |           | People with cancer   |                             |                       |
| 13 |                        |      | Systematic  | 6.8 | Medicine, General | Non-     | 0/10 | 13 | 1990-2013 | and central venous   | Anticoagulant - 6 types     | Placebo, no treatment |
| 14 |                        |      | Reviews     |     | & Internal        | industry |      |    |           | catheters            | Vitamin K antagonist - 2    |                       |
| 15 |                        |      | Cochrane    |     |                   |          |      |    |           |                      | types, direct oral          |                       |
| 16 | Kahale <sup>46</sup>   | 2018 | Database of | 6.8 | Medicine, General | Non-     | 0/11 | 16 | 2001-2018 | People with cancer   | anticoagulant - 4 types;    |                       |
| 17 |                        |      | Systematic  |     | & Internal        | industry |      |    |           | and venous           | low molecular weight        |                       |
| 18 |                        |      | Reviews     |     |                   |          |      |    |           | thromboembolism      | heparin - 4 types           | Anticoagulants        |
| 19 |                        |      | Cochrane    |     |                   |          |      |    |           |                      |                             |                       |
| 20 |                        |      | Database of |     |                   |          |      |    |           |                      |                             |                       |
| 21 | Kapur <sup>47</sup>    | 2018 | Systematic  | 6.8 | Medicine, General | Non-     | 3/5  | 7  | 1992-2012 | Children and adults  | Corticosteroids - 3 types   | Placebo, no treatment |
| 22 |                        |      | Reviews     |     | & Internal        | industry |      |    |           | with bronchiectasis  |                             |                       |
| 23 |                        |      | Cochrane    |     |                   |          |      |    |           |                      |                             |                       |
| 24 |                        |      | Database of |     |                   |          |      |    |           |                      |                             |                       |
| 25 |                        |      | Systematic  |     |                   |          |      |    |           |                      |                             |                       |
| 26 |                        |      | Reviews     |     |                   |          |      |    |           |                      |                             |                       |
| 27 |                        |      | Cochrane    |     |                   |          |      |    |           |                      |                             |                       |
| 28 |                        |      | Database of |     |                   |          |      |    |           |                      |                             |                       |
| 29 |                        |      | Systematic  |     |                   |          |      |    |           |                      |                             |                       |
| 30 |                        |      | Reviews     |     |                   |          |      |    |           |                      |                             |                       |
| 31 |                        |      | Cochrane    |     |                   |          |      |    |           |                      |                             |                       |
| 32 |                        |      | Database of |     |                   |          |      |    |           |                      |                             |                       |
| 33 |                        |      | Systematic  |     |                   |          |      |    |           |                      |                             |                       |
| 34 |                        |      | Reviews     |     |                   |          |      |    |           |                      |                             |                       |
| 35 | Lawrie <sup>51</sup>   | 2018 | Database of | 6.8 | Medicine, General | Non-     | 0/9  | 38 | 1978-2016 | Adults (18 years and | Inactivated influenza       | Placebo               |
| 36 |                        |      | Systematic  |     | & Internal        | industry |      |    |           | over) undergoing     | vaccine                     |                       |
| 37 |                        |      | Reviews     |     |                   |          |      |    |           | radiotherapy for     | Aminosaliculates - 4 types, |                       |
| 38 |                        |      | Cochrane    |     |                   |          |      |    |           | pelvic cancers       | corticosteroids, superoxide |                       |
| 39 |                        |      | Database of |     |                   |          |      |    |           |                      | dismutase, amifostine, bile |                       |
| 40 |                        |      | Systematic  |     |                   |          |      |    |           |                      | acid sequestrants,          |                       |
| 41 |                        |      | Reviews     |     |                   |          |      |    |           |                      | magnesium oxide,            |                       |
| 42 |                        |      | Cochrane    |     |                   |          |      |    |           |                      | misoprostol, octreotide,    |                       |
| 43 |                        |      | Database of |     |                   |          |      |    |           |                      | selenium, sodium butyrate,  |                       |
| 44 |                        |      | Systematic  |     |                   |          |      |    |           |                      | sucralfate, ibuprofen,      |                       |
| 45 |                        |      | Reviews     |     |                   |          |      |    |           |                      | famotidine, smectite,       |                       |
| 46 |                        |      | Cochrane    |     |                   |          |      |    |           |                      | simethicone, tropisetron    | Placebo, no treatment |
| 47 |                        |      | Database of |     |                   |          |      |    |           |                      |                             |                       |

|    |                          |      |             |     |                   |                      |      |    |           |                      |                            |                         |
|----|--------------------------|------|-------------|-----|-------------------|----------------------|------|----|-----------|----------------------|----------------------------|-------------------------|
| 1  |                          |      |             |     |                   |                      |      |    |           |                      |                            |                         |
| 2  |                          |      |             |     |                   |                      |      |    |           |                      |                            |                         |
| 3  |                          |      | Systematic  |     |                   |                      |      |    |           |                      | selective progesterone-    |                         |
| 4  |                          |      | Reviews     |     |                   |                      |      |    |           |                      | receptor modulators        |                         |
| 5  |                          |      | Cochrane    |     |                   |                      |      |    |           |                      |                            |                         |
| 6  |                          |      | Database of |     |                   |                      |      |    |           |                      |                            | 0.9% sodium chloride    |
| 7  | López-Briz <sup>54</sup> | 2018 | Systematic  | 6.8 | Medicine, General | Non-                 | 0/6  | 11 | 2002-2015 | Adults with central  | Heparin                    | (normal saline          |
| 8  |                          |      | Reviews     |     | & Internal        | industry             |      |    |           | venous catheters     |                            | solution)               |
| 9  |                          |      | Cochrane    |     |                   |                      |      |    |           | Children (18 years   |                            |                         |
| 10 |                          |      | Database of |     |                   |                      |      |    |           | and under) with      |                            |                         |
| 11 | Marchant <sup>55</sup>   | 2018 | Systematic  | 6.8 | Medicine, General | Non-                 | 2/4  | 3  | 1993-2012 | prolonged wet        | Antibiotics - 2 types      | Placebo, no treatment   |
| 12 |                          |      | Reviews     |     | & Internal        | industry             |      |    |           | cough (longer than   |                            |                         |
| 13 |                          |      | Cochrane    |     |                   |                      |      |    |           | 10 days)             |                            |                         |
| 14 | Matar <sup>56</sup>      | 2018 | Database of | 6.8 | Medicine, General | Non-                 | 0/3  | 7  | 1963-1999 | Patients with        | Fluphenazine               | Placebo                 |
| 15 |                          |      | Systematic  |     | & Internal        | industry             |      |    |           | schizophrenia        |                            |                         |
| 16 |                          |      | Reviews     |     |                   |                      |      |    |           |                      |                            |                         |
| 17 | Matar <sup>57</sup>      | 2018 | Cochrane    | 6.8 | Medicine, General | Non-                 | 0/11 | 20 | 1986-2018 | People with solid or | Low-molecular weight       | Unfractionated heparin  |
| 18 |                          |      | Database of |     | & Internal        | industry             |      |    |           | hematologic cancer   | heparin (LMWH) - 10        | (UFH), fondaparinux     |
| 19 |                          |      | Systematic  |     |                   |                      |      |    |           | undergoing surgery   | types                      |                         |
| 20 | McNicol <sup>58</sup>    | 2018 | Reviews     | 6.8 | Medicine, General | Non-                 | 1/3  | 13 | 1992-2016 | Postoperative        | Ketorolac                  | Placebo, opioid         |
| 21 |                          |      | Cochrane    |     | & Internal        | industry             |      |    |           | paediatric patients  |                            |                         |
| 22 |                          |      | Database of |     |                   |                      |      |    |           | (17 years and under) |                            |                         |
| 23 |                          |      | Systematic  |     |                   |                      |      |    |           | Children (16 years   |                            |                         |
| 24 |                          |      | Reviews     |     |                   |                      |      |    |           | and under)           |                            |                         |
| 25 | McTague <sup>59</sup>    | 2018 | Cochrane    | 6.8 | Medicine, General | Non-                 | 0/3  | 18 | 1995-2014 | presenting to a      | Lorazepam                  | Diazepam +              |
| 26 |                          |      | Database of |     | & Internal        | industry             |      |    |           | hospital or          |                            | phenytoin, diazepam,    |
| 27 |                          |      | Systematic  |     |                   |                      |      |    |           | emergency            |                            | paraldehyde,            |
| 28 |                          |      | Reviews     |     |                   |                      |      |    |           | department in an     |                            | midazolam               |
| 29 | Mhaskar <sup>60</sup>    | 2017 | Cochrane    | 6.8 | Medicine, General | Non-                 | 0/4  | 24 | 1982-2015 | acute tonic-clonic   |                            |                         |
| 30 |                          |      | Database of |     | & Internal        | industry             |      |    |           | convulsion           |                            |                         |
| 31 |                          |      | Systematic  |     |                   |                      |      |    |           |                      |                            |                         |
| 32 | Milligan <sup>61</sup>   | 2018 | Reviews     | 6.8 | Medicine, General | Non-                 | 0/4  | 18 | 1980-2016 | Patients with        | Bisphosphonates - 5 types  | Placebo, no treatment - |
| 33 |                          |      | Cochrane    |     | & Internal        | industry             |      |    |           | multiple myeloma     |                            | Network meta-analysis   |
| 34 |                          |      | Database of |     |                   |                      |      |    |           | (MM)                 |                            |                         |
| 35 |                          |      | Systematic  |     |                   |                      |      |    |           | Adults and children  | Typhoid fever vaccines - 4 | No treatment, placebo,  |
| 36 | Monk <sup>62</sup>       | 2017 | Reviews     | 6.8 | Medicine, General | Non-                 | 0/4  | 32 | 1993-2016 |                      | types                      | typhoid-inactive        |
| 37 |                          |      | Cochrane    |     | & Internal        | industry             |      |    |           | People undergoing    | Tramadol, non-steroidal    | agents                  |
| 38 |                          |      | Database of |     |                   |                      |      |    |           | orthodontic          | anti-inflammatory drugs,   |                         |
| 39 |                          |      | Systematic  |     |                   |                      |      |    |           | treatment            | paracetamol, local         |                         |
| 40 | Montero <sup>63</sup>    | 2018 | Reviews     | 6.8 | Medicine, General | No                   | 1/7  | 10 | 1991-2012 | Patients with        | anaesthetic                | Placebo, no treatment   |
| 41 |                          |      | Cochrane    |     | & Internal        | funding <sup>1</sup> |      |    |           | hepatitis C virus-   | Rituximab, interferon,     | Usual care,             |
| 42 |                          |      | Database of |     |                   |                      |      |    |           | associated mixed     | immunosuppressive drug     | immunoadsorption        |
| 43 |                          |      | Systematic  |     |                   |                      |      |    |           | cryoglobulinaemia    | therapy                    | apheresis               |
| 44 |                          |      | Reviews     |     |                   |                      |      |    |           | Adults (18 years and |                            |                         |
| 45 | Mücke <sup>64</sup>      | 2018 | Database of | 6.8 | Medicine, General | Non-                 | 2/5  | 16 | 2004-2017 | over) with chronic   | Cannabis-based medicines   | Placebo,                |
| 46 |                          |      | Systematic  |     | & Internal        | industry             |      |    |           | neuropathic pain     | - 5 types                  | dihydrocodeine          |
| 47 |                          |      | Reviews     |     |                   |                      |      |    |           |                      |                            |                         |

|    |                          |      |             |     |                   |          |     |                 |            |                       |                            |                         |
|----|--------------------------|------|-------------|-----|-------------------|----------|-----|-----------------|------------|-----------------------|----------------------------|-------------------------|
| 1  |                          |      |             |     |                   |          |     |                 |            |                       |                            |                         |
| 2  |                          |      |             |     |                   |          |     |                 |            |                       |                            |                         |
| 3  |                          |      | Systematic  |     |                   |          |     |                 |            |                       |                            |                         |
| 4  |                          |      | Reviews     |     |                   |          |     |                 |            |                       |                            |                         |
| 5  |                          |      | Cochrane    |     |                   |          |     |                 |            |                       |                            |                         |
| 6  |                          |      | Database of |     |                   |          |     |                 |            |                       |                            |                         |
| 7  | Narula <sup>65</sup>     | 2018 | Systematic  | 6.8 | Medicine, General | Non-     | 3/7 | 10 <sup>i</sup> | 1990-2014  | Adults and children   | Corticosteroids - 5 types  | Enteral nutrition       |
| 8  |                          |      | Reviews     |     | & Internal        | industry |     |                 |            | Adults or children    |                            |                         |
| 9  |                          |      | Cochrane    |     |                   |          |     |                 |            | with partial onset    |                            |                         |
| 10 |                          |      | Database of |     |                   |          |     |                 |            | seizures or           |                            |                         |
| 11 | Nevitt <sup>66</sup>     | 2017 | Systematic  | 6.8 | Medicine, General | Non-     | 1/5 | 76              | 1981-2015  | generalised onset     | Antiepileptic drugs - 10   | Network meta-analysis   |
| 12 |                          |      | Reviews     |     | & Internal        | industry |     |                 |            | tonic-clonic seizures | types                      |                         |
| 13 |                          |      | Cochrane    |     |                   |          |     |                 |            | Adults and children   |                            |                         |
| 14 | Nevitt <sup>67</sup>     | 2018 | Database of | 6.8 | Medicine, General | Non-     | 1/4 | 14              | 1995-2015  | with focal onset or   | Lamotrigine                | Carbamazepine           |
| 15 |                          |      | Systematic  |     | & Internal        | industry |     |                 |            | generalised onset     |                            |                         |
| 16 |                          |      | Reviews     |     |                   |          |     |                 |            | seizures              |                            |                         |
| 17 | Norman <sup>68</sup>     | 2018 | Cochrane    | 6.8 | Medicine, General | Non-     | 1/6 | 78              | 1985-2016  | Adults (18 years and  | Topical agents - 10 types  | Dressings - 12 types;   |
| 18 |                          |      | Database of |     | & Internal        | industry |     |                 |            | over) with venous     |                            | Network meta-analysis   |
| 19 |                          |      | Systematic  |     |                   |          |     |                 |            | leg ulcers            |                            |                         |
| 20 | Normansell <sup>69</sup> | 2018 | Reviews     | 6.8 | Medicine, General | Non-     | 0/6 | 6               | 1974-2016  | Children and adults   | Antibiotics - 4 types      | Placebo                 |
| 21 |                          |      | Cochrane    |     | & Internal        | industry |     |                 |            | with acute asthma     | Propranolol, timolol       |                         |
| 22 |                          |      | Database of |     |                   |          |     |                 |            | exacerbation          | maleate, bleomycin,        |                         |
| 23 |                          |      | Systematic  |     |                   |          |     |                 |            |                       | atenolol, prednisolone,    |                         |
| 24 |                          |      | Reviews     |     | Medicine, General | Non-     | 1/7 | 24              | 1977-2016  | Children (17 years    | captopril, ibuprofen +     | Placebo, radiation,     |
| 25 | Novoa <sup>70</sup>      | 2018 | Cochrane    | 6.8 | & Internal        | industry |     |                 |            | and under) with       | paracetamol, methylene     | lasers                  |
| 26 |                          |      | Database of |     |                   |          |     |                 |            | single or multiple    | blue, triamcinolone,       |                         |
| 27 |                          |      | Systematic  |     |                   |          |     |                 |            | haemangiomas          | methylprednisolone         |                         |
| 28 |                          |      | Reviews     |     |                   |          |     |                 |            | located on the skin   |                            |                         |
| 29 |                          |      | Cochrane    |     |                   |          |     |                 |            | Preterm (< 37         |                            |                         |
| 30 | Ohlsson <sup>71</sup>    | 2017 | Database of | 6.8 | Medicine, General | No       | 0/2 | 34              | 1991-2017  | weeks' gestation)     | Erythropoiesis-stimulating | Placebo, no treatment   |
| 31 |                          |      | Systematic  |     | & Internal        | funding  |     |                 |            | and low birth weight  | agents (ESAs) - 2 types    |                         |
| 32 |                          |      | Reviews     |     |                   |          |     |                 |            | (< 2500 grams)        |                            |                         |
| 33 | Ostinelli <sup>72</sup>  | 2018 | Cochrane    | 6.8 | Medicine, General | No       | 1/5 | 3               | 2005-2016  | infants less than     | Aripiprazole               | Placebo, other anti-    |
| 34 |                          |      | Database of |     | & Internal        | funding  |     |                 |            | eight days of age     |                            | psychotic medications   |
| 35 |                          |      | Systematic  |     |                   |          |     |                 |            | Adults exhibiting     |                            | - 2 types               |
| 36 | Ostinelli <sup>73</sup>  | 2018 | Reviews     | 6.8 | Medicine, General | No       | 0/6 | 9               | 2010-2014  | aggression or         | Risperidone                | Haloperidol,            |
| 37 |                          |      | Cochrane    |     | & Internal        | Non-     |     |                 |            | aggression or         |                            | olanzapine, quetiapine, |
| 38 |                          |      | Database of |     |                   | industry |     |                 |            | agitation             |                            | oxcarbazepine,          |
| 39 | Ostuzzi <sup>74</sup>    | 2018 | Systematic  | 6.8 | Medicine, General | Non-     | 1/5 | 7               | 1985-      | Adults (18 years and  | Antidepressants - 6 types  | Placebo                 |
| 40 |                          |      | Reviews     |     | & Internal        | industry |     |                 | Unpublishe | over) with cancer     |                            |                         |
| 41 |                          |      | Cochrane    |     |                   |          |     |                 | d          | and depression        |                            |                         |
| 42 |                          |      | Database of |     |                   |          |     |                 |            |                       |                            |                         |
| 43 |                          |      | Systematic  |     |                   |          |     |                 |            |                       |                            |                         |
| 44 |                          |      | Reviews     |     |                   |          |     |                 |            |                       |                            |                         |
| 45 |                          |      | Cochrane    |     |                   |          |     |                 |            |                       |                            |                         |
| 46 |                          |      | Database of |     |                   |          |     |                 |            |                       |                            |                         |
| 47 |                          |      | Systematic  |     |                   |          |     |                 |            |                       |                            |                         |



|    |                            |      |             |     |                   |          |            |     |                     |                        |                              |                        |
|----|----------------------------|------|-------------|-----|-------------------|----------|------------|-----|---------------------|------------------------|------------------------------|------------------------|
| 1  |                            |      |             |     |                   |          |            |     |                     |                        |                              |                        |
| 2  |                            |      |             |     |                   |          |            |     |                     |                        |                              |                        |
| 3  |                            |      | Cochrane    |     |                   |          |            |     |                     |                        |                              |                        |
| 4  |                            |      | Database of |     |                   |          |            |     | Children and adults |                        |                              |                        |
| 5  | Parker <sup>75</sup>       | 2018 | Systematic  | 6.8 | Medicine, General | Non-     | 2/5        | 2   | 2011-2013           | with active Crohn's    | Naltrexone                   | Placebo                |
| 6  |                            |      | Reviews     |     | & Internal        | industry |            |     |                     | disease                |                              | Tamoxifen, interferon- |
| 7  |                            |      |             |     |                   |          |            |     |                     |                        |                              | alpha, interleukin-2,  |
| 8  |                            |      |             |     |                   |          |            |     |                     |                        |                              | interferon-alpha +     |
| 9  |                            |      |             |     |                   |          |            |     |                     |                        |                              | interleukin-2, Bacille |
| 10 |                            |      |             |     |                   |          |            |     |                     |                        | Single agent                 | Calmette-Guérin        |
| 11 |                            |      |             |     |                   |          |            |     |                     |                        | chemotherapy,                | (BCG),                 |
| 12 |                            |      |             |     |                   |          |            |     |                     |                        | polychemotherapy,            | corynebacterium        |
| 13 |                            |      | Cochrane    |     |                   |          |            |     |                     |                        | temozolomide,                | parvum, anti-PD1       |
| 14 | Pasquali <sup>76</sup>     | 2018 | Database of | 6.8 | Medicine, General | Non-     | 0/5        | 122 | 1972-2015           | Patients with          | dacarbazine, anti-CTLA4      | monoclonal             |
| 15 |                            |      | Systematic  |     | & Internal        | industry |            |     |                     | unresectable lymph     | monoclonal antibodies,       | antibodies, sorafenib, |
| 16 |                            |      | Reviews     |     |                   |          |            |     |                     | node metastasis and    | other immunostimulating      | elesclomol, anti-      |
| 17 |                            |      | Cochrane    |     |                   |          |            |     |                     | distant metastatic     | agents, MEK inhibitors       | angiogenic drugs       |
| 18 | Pike <sup>77</sup>         | 2018 | Database of | 6.8 | Medicine, General | Non-     | 0/4        | 4   | 2007-2017           | Children (18 years     | Omalizumab, leukotriene      | Placebo                |
| 19 |                            |      | Systematic  |     | & Internal        | industry |            |     |                     | and under) with        | receptor antagonists - 2     |                        |
| 20 |                            |      | Reviews     |     |                   |          |            |     |                     | asthma                 | types, corticosteroids       |                        |
| 21 | Rirash <sup>78</sup>       | 2017 | Cochrane    | 6.8 | Medicine, General | Not      | Not        | 38  | 1982-2000           | Patients with          |                              | Placebo                |
| 22 |                            |      | Database of |     | & Internal        | reported | reported/8 |     |                     | Raynaud's              | Calcium channel blockers     |                        |
| 23 |                            |      | Systematic  |     |                   |          |            |     |                     | phenomenon             |                              |                        |
| 24 | Robertson <sup>79</sup>    | 2017 | Reviews     | 6.8 | Medicine, General | Non-     | 0/3        | 6   | 1995-2016           | Adults (18 years and   | Warfarin, aspirin,           | Placebo                |
| 25 |                            |      | Cochrane    |     | & Internal        | industry |            |     |                     | over) with             | rivaroxaban                  |                        |
| 26 |                            |      | Database of |     |                   |          |            |     |                     | unprovoked venous      |                              |                        |
| 27 |                            |      | Systematic  |     |                   |          |            |     |                     | thromboembolism        |                              |                        |
| 28 | Romero <sup>80</sup>       | 2017 | Reviews     | 6.8 | Medicine, General | Non-     | 0/3        | 7   | 1983-1999           | Sexually active        | Macrolide antibiotics - 3    | Other antibiotics - 4  |
| 29 |                            |      | Cochrane    |     | & Internal        | industry |            |     |                     | adults (16 years and   | types                        | types                  |
| 30 |                            |      | Database of |     |                   |          |            |     |                     | over) with genital     |                              |                        |
| 31 | Rosomeck <sup>81</sup>     | 2018 | Systematic  | 6.8 | Medicine, General | Non-     | 0/3        | 15  | 1996-2016           | ulcers compatible      | Ivermectin                   | Permethrin             |
| 32 |                            |      | Reviews     |     | & Internal        | industry |            |     |                     | with chancroid         |                              |                        |
| 33 |                            |      | Cochrane    |     |                   |          |            |     |                     | People with scabies    |                              |                        |
| 34 | Rüschén <sup>82</sup>      | 2018 | Database of | 6.8 | Medicine, General | Non-     | 0/4        | 7   | 1995-2012           | of all ages and either | Hyaluronidase                | Local anaesthetic      |
| 35 |                            |      | Systematic  |     | & Internal        | industry |            |     |                     | sex                    | Methylphenidate,             | mixture (standard      |
| 36 |                            |      | Reviews     |     |                   |          |            |     |                     | Adults (18 years and   | modafinil, cholinesterase    | treatment)             |
| 37 |                            |      | Cochrane    |     |                   |          |            |     |                     | over) undergoing       | inhibitors (ChEIs), atypical |                        |
| 38 |                            |      | Database of |     |                   |          |            |     |                     | intraocular surgery    | antipsychotics,              |                        |
| 39 | Ruthirakuhan <sup>83</sup> | 2018 | Systematic  | 6.8 | Medicine, General | Non-     | 2/5        | 21  | 1998-2017           | People with            | mibampator, valproate,       | Placebo                |
| 40 |                            |      | Reviews     |     | & Internal        | industry |            |     |                     | Alzheimer's Disease    | semagacestat                 |                        |
| 41 |                            |      |             |     |                   |          |            |     |                     |                        |                              |                        |
| 42 |                            |      |             |     |                   |          |            |     |                     |                        |                              |                        |
| 43 |                            |      |             |     |                   |          |            |     |                     |                        |                              |                        |
| 44 |                            |      |             |     |                   |          |            |     |                     |                        |                              |                        |
| 45 |                            |      |             |     |                   |          |            |     |                     |                        |                              |                        |
| 46 |                            |      |             |     |                   |          |            |     |                     |                        |                              |                        |
| 47 |                            |      |             |     |                   |          |            |     |                     |                        |                              |                        |

|    |                        |      |             |     |                   |          |     |                 |           |                      |                           |
|----|------------------------|------|-------------|-----|-------------------|----------|-----|-----------------|-----------|----------------------|---------------------------|
| 1  |                        |      |             |     |                   |          |     |                 |           |                      |                           |
| 2  |                        |      |             |     |                   |          |     |                 |           |                      |                           |
| 3  |                        |      | Cochrane    |     |                   |          |     |                 |           |                      |                           |
| 4  |                        |      | Database of |     |                   |          |     |                 |           |                      |                           |
| 5  | Sankar <sup>84</sup>   | 2018 | Systematic  | 6.8 | Medicine, General | No       | 0/3 | 6               | 2011-2016 | Preterm infants with | Anti-vascular endothelial |
| 6  |                        |      | Reviews     |     | & Internal        | funding  |     |                 |           | retinopathy          | growth factor agents - 2  |
| 7  |                        |      |             |     |                   |          |     |                 |           |                      | Cryo/laser therapy        |
| 8  |                        |      |             |     |                   |          |     |                 |           |                      |                           |
| 9  |                        |      | Cochrane    |     |                   |          |     |                 |           |                      |                           |
| 10 |                        |      | Database of |     |                   |          |     |                 |           |                      |                           |
| 11 | Schumann <sup>85</sup> | 2018 | Systematic  | 6.8 | Medicine, General | Non-     | 3/9 | 13              | 1990-2013 | Adults (18 years and | epinephrine,              |
| 12 |                        |      | Reviews     |     | & Internal        | industry |     |                 |           | over) with           | norepinephrine-           |
| 13 |                        |      |             |     |                   |          |     |                 |           | cardiogenic shock or | dobutamine, amrinone,     |
| 14 | Simancas-              |      |             |     |                   |          |     |                 |           | acute low cardiac    | dopexamine, dopamine,     |
| 15 | Racines <sup>86</sup>  | 2018 | Systematic  | 6.8 | Medicine, General | Non-     | 0/6 | 13 <sup>k</sup> | 1992-1994 | output syndrome      | nitric oxid               |
| 16 |                        |      | Reviews     |     | & Internal        | industry |     |                 |           | People suffering     | Acetazolamide, ibuprofen, |
| 17 |                        |      |             |     |                   |          |     |                 |           | from high altitude   | dexamethasone, oxygen,    |
| 18 |                        |      |             |     |                   |          |     |                 |           | illness              | nitric oxide, gabapentin, |
| 19 |                        |      | Cochrane    |     |                   |          |     |                 |           |                      | magnesium sulphate,       |
| 20 |                        |      | Database of |     |                   |          |     |                 |           |                      | sumatriptan               |
| 21 |                        |      | Systematic  |     |                   |          |     |                 |           |                      | Placebo, normal air,      |
| 22 |                        |      | Reviews     |     |                   |          |     |                 |           |                      | unspecified control,      |
| 23 |                        |      |             |     |                   |          |     |                 |           |                      | paracetamol               |
| 24 |                        |      |             |     |                   |          |     |                 |           |                      |                           |
| 25 |                        |      |             |     |                   |          |     |                 |           |                      |                           |
| 26 |                        |      |             |     |                   |          |     |                 |           |                      |                           |
| 27 |                        |      |             |     |                   |          |     |                 |           |                      |                           |
| 28 |                        |      |             |     |                   |          |     |                 |           |                      |                           |
| 29 |                        |      |             |     |                   |          |     |                 |           |                      |                           |
| 30 |                        |      |             |     |                   |          |     |                 |           |                      |                           |
| 31 |                        |      |             |     |                   |          |     |                 |           |                      |                           |
| 32 |                        |      |             |     |                   |          |     |                 |           |                      |                           |
| 33 |                        |      |             |     |                   |          |     |                 |           |                      |                           |
| 34 |                        |      |             |     |                   |          |     |                 |           |                      |                           |
| 35 |                        |      |             |     |                   |          |     |                 |           |                      |                           |
| 36 |                        |      |             |     |                   |          |     |                 |           |                      |                           |
| 37 |                        |      |             |     |                   |          |     |                 |           |                      |                           |
| 38 |                        |      |             |     |                   |          |     |                 |           |                      |                           |
| 39 |                        |      |             |     |                   |          |     |                 |           |                      |                           |
| 40 |                        |      |             |     |                   |          |     |                 |           |                      |                           |
| 41 |                        |      |             |     |                   |          |     |                 |           |                      |                           |
| 42 |                        |      |             |     |                   |          |     |                 |           |                      |                           |
| 43 |                        |      |             |     |                   |          |     |                 |           |                      |                           |
| 44 |                        |      |             |     |                   |          |     |                 |           |                      |                           |
| 45 |                        |      |             |     |                   |          |     |                 |           |                      |                           |
| 46 |                        |      |             |     |                   |          |     |                 |           |                      |                           |
| 47 |                        |      |             |     |                   |          |     |                 |           |                      |                           |

|    |                                 |      |                                                  |     |                                 |                  |     |                  |           |                                                                                                                                                 |                                                                                                                                                                     |                                                                                                                                                                                                                                                                       |
|----|---------------------------------|------|--------------------------------------------------|-----|---------------------------------|------------------|-----|------------------|-----------|-------------------------------------------------------------------------------------------------------------------------------------------------|---------------------------------------------------------------------------------------------------------------------------------------------------------------------|-----------------------------------------------------------------------------------------------------------------------------------------------------------------------------------------------------------------------------------------------------------------------|
| 1  |                                 |      |                                                  |     |                                 |                  |     |                  |           |                                                                                                                                                 |                                                                                                                                                                     |                                                                                                                                                                                                                                                                       |
| 2  |                                 |      |                                                  |     |                                 |                  |     |                  |           |                                                                                                                                                 |                                                                                                                                                                     |                                                                                                                                                                                                                                                                       |
| 3  |                                 |      |                                                  |     |                                 |                  |     |                  |           |                                                                                                                                                 |                                                                                                                                                                     |                                                                                                                                                                                                                                                                       |
| 4  |                                 |      |                                                  |     |                                 |                  |     |                  |           |                                                                                                                                                 |                                                                                                                                                                     | mepivacaine, prilocaine,<br>prilocaine + felypressin,<br>prilocaine + epinephrine                                                                                                                                                                                     |
| 5  |                                 |      |                                                  |     |                                 |                  |     |                  |           |                                                                                                                                                 |                                                                                                                                                                     |                                                                                                                                                                                                                                                                       |
| 6  |                                 |      | Cochrane<br>Database of<br>Systematic<br>Reviews | 6.8 | Medicine, General<br>& Internal | Non-<br>industry | 0/6 | 17               | 1972-2015 | Adults and children<br>with pneumonia                                                                                                           | Corticosteroids - 7 types                                                                                                                                           | Placebo, usual care                                                                                                                                                                                                                                                   |
| 7  | Stern <sup>92</sup>             | 2017 |                                                  |     |                                 |                  |     |                  |           |                                                                                                                                                 |                                                                                                                                                                     |                                                                                                                                                                                                                                                                       |
| 8  |                                 |      |                                                  |     |                                 |                  |     |                  |           |                                                                                                                                                 |                                                                                                                                                                     |                                                                                                                                                                                                                                                                       |
| 9  |                                 |      |                                                  |     |                                 |                  |     |                  |           |                                                                                                                                                 |                                                                                                                                                                     |                                                                                                                                                                                                                                                                       |
| 10 |                                 |      |                                                  |     |                                 |                  |     |                  |           |                                                                                                                                                 |                                                                                                                                                                     |                                                                                                                                                                                                                                                                       |
| 11 |                                 |      | Cochrane<br>Database of<br>Systematic<br>Reviews | 6.8 | Medicine, General<br>& Internal | No<br>funding    | 0/3 | 4                | 1995-2013 | Children and<br>adolescents (18<br>years or under) with<br>autism spectrum<br>disorder (ASD) or<br>pervasive<br>developmental<br>disorder (PDD) | Methylphenidate                                                                                                                                                     | Placebo                                                                                                                                                                                                                                                               |
| 12 | Sturman <sup>93</sup>           | 2017 |                                                  |     |                                 |                  |     |                  |           |                                                                                                                                                 |                                                                                                                                                                     |                                                                                                                                                                                                                                                                       |
| 13 |                                 |      |                                                  |     |                                 |                  |     |                  |           |                                                                                                                                                 |                                                                                                                                                                     |                                                                                                                                                                                                                                                                       |
| 14 |                                 |      | Cochrane<br>Database of<br>Systematic<br>Reviews | 6.8 | Medicine, General<br>& Internal | Non-<br>industry | 0/4 | 14               | 1976-2014 | Psychiatric patients<br>with antipsychotic-<br>induced tardive<br>dyskinesia                                                                    | Cholinergic drugs - 6 types                                                                                                                                         | Placebo                                                                                                                                                                                                                                                               |
| 15 | Tammenmaa-<br>Aho <sup>94</sup> | 2018 |                                                  |     |                                 |                  |     |                  |           |                                                                                                                                                 |                                                                                                                                                                     |                                                                                                                                                                                                                                                                       |
| 16 |                                 |      |                                                  |     |                                 |                  |     |                  |           |                                                                                                                                                 |                                                                                                                                                                     |                                                                                                                                                                                                                                                                       |
| 17 |                                 |      |                                                  |     |                                 |                  |     |                  |           |                                                                                                                                                 |                                                                                                                                                                     |                                                                                                                                                                                                                                                                       |
| 18 |                                 |      |                                                  |     |                                 |                  |     |                  |           |                                                                                                                                                 |                                                                                                                                                                     |                                                                                                                                                                                                                                                                       |
| 19 |                                 |      | Cochrane<br>Database of<br>Systematic<br>Reviews | 6.8 | Medicine, General<br>& Internal | Non-<br>industry | 2/4 | 8                | 2006-2014 | Adults (17 years and<br>over) with severe<br>mental illness and<br>co-occurring<br>substance use<br>disorder                                    | Risperidone                                                                                                                                                         | Other antipsychotics -<br>5 types                                                                                                                                                                                                                                     |
| 20 | Temmingh <sup>95</sup>          | 2018 |                                                  |     |                                 |                  |     |                  |           |                                                                                                                                                 |                                                                                                                                                                     |                                                                                                                                                                                                                                                                       |
| 21 |                                 |      |                                                  |     |                                 |                  |     |                  |           |                                                                                                                                                 |                                                                                                                                                                     |                                                                                                                                                                                                                                                                       |
| 22 |                                 |      | Cochrane<br>Database of<br>Systematic<br>Reviews | 6.8 | Medicine, General<br>& Internal | Non-<br>industry | 1/7 | 13               | 1997-2018 | Adults with HIV-<br>associated<br>cryptococcal<br>meningitis                                                                                    | Antifungal induction<br>therapies - 6 types                                                                                                                         | Network meta-analysis<br>H2 receptor<br>antagonists, proton<br>pump inhibitors,<br>prostaglandin<br>analogues,<br>anticholinergics,<br>antacids, sucralfate,<br>teprenone, naloxone,<br>bioflavonoids,<br>placebo, no treatment,<br>other medication (not<br>defined) |
| 23 | Tenforde <sup>96</sup>          | 2018 |                                                  |     |                                 |                  |     |                  |           |                                                                                                                                                 |                                                                                                                                                                     |                                                                                                                                                                                                                                                                       |
| 24 |                                 |      |                                                  |     |                                 |                  |     |                  |           |                                                                                                                                                 |                                                                                                                                                                     |                                                                                                                                                                                                                                                                       |
| 25 |                                 |      |                                                  |     |                                 |                  |     |                  |           |                                                                                                                                                 |                                                                                                                                                                     |                                                                                                                                                                                                                                                                       |
| 26 |                                 |      |                                                  |     |                                 |                  |     |                  |           |                                                                                                                                                 |                                                                                                                                                                     |                                                                                                                                                                                                                                                                       |
| 27 |                                 |      |                                                  |     |                                 |                  |     |                  |           |                                                                                                                                                 |                                                                                                                                                                     |                                                                                                                                                                                                                                                                       |
| 28 |                                 |      |                                                  |     |                                 |                  |     |                  |           |                                                                                                                                                 |                                                                                                                                                                     |                                                                                                                                                                                                                                                                       |
| 29 |                                 |      |                                                  |     |                                 |                  |     |                  |           |                                                                                                                                                 |                                                                                                                                                                     |                                                                                                                                                                                                                                                                       |
| 30 |                                 |      |                                                  |     |                                 |                  |     |                  |           |                                                                                                                                                 |                                                                                                                                                                     |                                                                                                                                                                                                                                                                       |
| 31 |                                 |      |                                                  |     |                                 |                  |     |                  |           |                                                                                                                                                 |                                                                                                                                                                     |                                                                                                                                                                                                                                                                       |
| 32 |                                 |      | Cochrane<br>Database of<br>Systematic<br>Reviews | 6.8 | Medicine, General<br>& Internal | Non-<br>industry | 0/7 | 103 <sup>n</sup> | 1977-2016 | People admitted to<br>intensive care units                                                                                                      | H2 receptor antagonists,<br>proton pump inhibitors,<br>prostaglandin analogues,<br>anticholinergics, antacids,<br>sucralfate, teprenone,<br>naloxone, bioflavonoids |                                                                                                                                                                                                                                                                       |
| 33 | Toews <sup>97</sup>             | 2018 |                                                  |     |                                 |                  |     |                  |           |                                                                                                                                                 |                                                                                                                                                                     |                                                                                                                                                                                                                                                                       |
| 34 |                                 |      |                                                  |     |                                 |                  |     |                  |           |                                                                                                                                                 |                                                                                                                                                                     |                                                                                                                                                                                                                                                                       |
| 35 |                                 |      | Cochrane<br>Database of<br>Systematic<br>Reviews | 6.8 | Medicine, General<br>& Internal | Non-<br>industry | 1/4 | 3 <sup>o</sup>   | 1992-1996 | Children (16 years<br>and under) with<br>recurrent acute otitis<br>media                                                                        | Antibiotics - 3 types                                                                                                                                               | Grommets                                                                                                                                                                                                                                                              |
| 36 | Venekamp <sup>98</sup>          | 2018 |                                                  |     |                                 |                  |     |                  |           |                                                                                                                                                 |                                                                                                                                                                     |                                                                                                                                                                                                                                                                       |
| 37 |                                 |      |                                                  |     |                                 |                  |     |                  |           |                                                                                                                                                 |                                                                                                                                                                     |                                                                                                                                                                                                                                                                       |
| 38 |                                 |      |                                                  |     |                                 |                  |     |                  |           |                                                                                                                                                 |                                                                                                                                                                     |                                                                                                                                                                                                                                                                       |
| 39 |                                 |      | Cochrane<br>Database of<br>Systematic<br>Reviews | 6.8 | Medicine, General<br>& Internal | Non-<br>industry | 0/6 | 8                | 1998-2016 | Individuals who had<br>an ischemic or<br>hemorrhagic stroke                                                                                     | Preventive antibiotics                                                                                                                                              | Placebo, standard care                                                                                                                                                                                                                                                |
| 40 | Vermeij <sup>99</sup>           | 2018 |                                                  |     |                                 |                  |     |                  |           |                                                                                                                                                 |                                                                                                                                                                     |                                                                                                                                                                                                                                                                       |
| 41 |                                 |      |                                                  |     |                                 |                  |     |                  |           |                                                                                                                                                 |                                                                                                                                                                     |                                                                                                                                                                                                                                                                       |
| 42 |                                 |      |                                                  |     |                                 |                  |     |                  |           |                                                                                                                                                 |                                                                                                                                                                     |                                                                                                                                                                                                                                                                       |
| 43 |                                 |      |                                                  |     |                                 |                  |     |                  |           |                                                                                                                                                 |                                                                                                                                                                     |                                                                                                                                                                                                                                                                       |
| 44 |                                 |      |                                                  |     |                                 |                  |     |                  |           |                                                                                                                                                 |                                                                                                                                                                     |                                                                                                                                                                                                                                                                       |
| 45 |                                 |      |                                                  |     |                                 |                  |     |                  |           |                                                                                                                                                 |                                                                                                                                                                     |                                                                                                                                                                                                                                                                       |
| 46 |                                 |      |                                                  |     |                                 |                  |     |                  |           |                                                                                                                                                 |                                                                                                                                                                     |                                                                                                                                                                                                                                                                       |
| 47 |                                 |      |                                                  |     |                                 |                  |     |                  |           |                                                                                                                                                 |                                                                                                                                                                     |                                                                                                                                                                                                                                                                       |

|    |                          |      |             |     |                   |          |      |       |                        |                      |                            |                        |
|----|--------------------------|------|-------------|-----|-------------------|----------|------|-------|------------------------|----------------------|----------------------------|------------------------|
| 1  |                          |      |             |     |                   |          |      |       |                        |                      |                            |                        |
| 2  |                          |      |             |     |                   |          |      |       |                        |                      |                            |                        |
| 3  |                          |      |             |     |                   |          |      |       |                        |                      |                            |                        |
| 4  |                          |      | Cochrane    |     |                   |          |      |       | Patients with critical |                      |                            |                        |
| 5  |                          |      | Database of |     |                   |          |      | 1983- | limb ischaemia         |                      |                            |                        |
| 6  | Vietto <sup>100</sup>    | 2018 | Systematic  | 6.8 | Medicine, General | Non-     | 0/6  | 33    | Unpublishe             | or reconstructive    | Prostanoids - 7 types      | Placebo, other active  |
| 7  |                          |      | Reviews     |     | & Internal        | industry |      |       | d                      | intervention         |                            | drugs - 4 types        |
| 8  |                          |      | Cochrane    |     |                   |          |      |       |                        |                      |                            |                        |
| 9  |                          |      | Database of |     |                   |          |      |       |                        |                      |                            |                        |
| 10 | Wall <sup>101</sup>      | 2018 | Systematic  | 6.8 | Medicine, General | Non-     | 0/5  | 5     | 1995-2014              | Patients with acute  | Glycerol                   | Treatment as usual     |
| 11 |                          |      | Reviews     |     | & Internal        | industry |      |       |                        | bacterial meningitis |                            |                        |
| 12 |                          |      |             |     |                   |          |      |       |                        | Adult patients (over |                            |                        |
| 13 |                          |      | Cochrane    |     |                   |          |      |       |                        | 18 years)            |                            |                        |
| 14 |                          |      | Database of |     |                   |          |      |       |                        | undergoing any       |                            |                        |
| 15 | Weibel <sup>102</sup>    | 2018 | Systematic  | 6.8 | Medicine, General | Non-     | 3/10 | 68    | 1985-2017              | elective or urgent   | Lidocaine                  | Placebo, no treatment, |
| 16 |                          |      | Reviews     |     | & Internal        | industry |      |       |                        | surgical procedure   | Thiazides, beta-blockers,  | thoracic epidural      |
| 17 |                          |      | Cochrane    |     |                   |          |      |       |                        | under general        | angiotensin-converting-    | analgesia - 3 types    |
| 18 |                          |      | Database of |     |                   |          |      |       |                        | anaesthesia          | enzyme inhibitors, calcium |                        |
| 19 |                          |      | Systematic  |     |                   |          |      |       |                        | Adult patients with  | channel blockers           | Placebo                |
| 20 |                          |      | Reviews     |     |                   |          |      |       |                        | primary              |                            |                        |
| 21 |                          |      |             |     |                   |          |      |       |                        | hypertension         |                            |                        |
| 22 | Xiao <sup>104</sup>      | 2018 | Cochrane    | 6.8 | Medicine, General | Non-     | 0/4  | 2     | 2001-2003              | Patients with focal  |                            |                        |
| 23 |                          |      | Database of |     | & Internal        | industry |      |       |                        | epilepsy that failed | Losigamone                 | Placebo                |
| 24 |                          |      | Systematic  |     |                   |          |      |       |                        | to respond to one or |                            |                        |
| 25 |                          |      | Reviews     |     |                   |          |      |       |                        | more antiepileptic   |                            |                        |
| 26 | Zhang <sup>105</sup>     | 2017 | Systematic  | 6.8 | Medicine, General | No       | 0/5  | 3     | 2009-2015              | drugs                | Thrombopoietin receptor    | Placebo                |
| 27 |                          |      | Reviews     |     | & Internal        | funding  |      |       |                        | Adult and elder      | agonists (TPO-RAs)         |                        |
| 28 |                          |      | Cochrane    |     |                   |          |      |       |                        | patients with solid  |                            |                        |
| 29 |                          |      | Database of |     |                   |          |      |       |                        | tumours              |                            |                        |
| 30 |                          |      | Systematic  |     |                   |          |      |       |                        | Adults (18 years and |                            |                        |
| 31 |                          |      | Reviews     |     |                   |          |      |       |                        | over) with           | Oxcarbazepine              | Placebo                |
| 32 | Zonneveld <sup>107</sup> | 2018 | Cochrane    | 6.8 | Medicine, General | Non-     | 0/6  | 5     | 2004-2014              | neuropathic pain     |                            |                        |
| 33 |                          |      | Database of |     | & Internal        | industry |      |       |                        | Adult patients with  |                            |                        |
| 34 |                          |      | Systematic  |     |                   |          |      |       |                        | an ischaemic stroke, | Blood pressure-lowering    | Placebo, no treatment  |
| 35 |                          |      | Reviews     |     |                   | Not      | 0/7  | 11    | 1970-2017              | haemorrhagic stroke  | drugs (BPLDs) - 5 types    |                        |
| 36 |                          |      |             |     |                   | reported |      |       |                        | or transient         |                            |                        |
| 37 |                          |      |             |     |                   |          |      |       |                        | ischaemic attack     |                            |                        |
| 38 |                          |      |             |     |                   |          |      |       |                        |                      |                            |                        |
| 39 |                          |      |             |     |                   |          |      |       |                        |                      |                            |                        |
| 40 |                          |      |             |     |                   |          |      |       |                        |                      |                            |                        |
| 41 |                          |      |             |     |                   |          |      |       |                        |                      |                            |                        |
| 42 |                          |      |             |     |                   |          |      |       |                        |                      |                            |                        |
| 43 |                          |      |             |     |                   |          |      |       |                        |                      |                            |                        |
| 44 |                          |      |             |     |                   |          |      |       |                        |                      |                            |                        |
| 45 |                          |      |             |     |                   |          |      |       |                        |                      |                            |                        |
| 46 |                          |      |             |     |                   |          |      |       |                        |                      |                            |                        |
| 47 |                          |      |             |     |                   |          |      |       |                        |                      |                            |                        |

|    |                      |      |          |     |                              |              |     |    |           |                                                                                                                                                      |                                                                         |                                                   |
|----|----------------------|------|----------|-----|------------------------------|--------------|-----|----|-----------|------------------------------------------------------------------------------------------------------------------------------------------------------|-------------------------------------------------------------------------|---------------------------------------------------|
| 1  |                      |      |          |     |                              |              |     |    |           |                                                                                                                                                      |                                                                         |                                                   |
| 2  |                      |      |          |     |                              |              |     |    |           |                                                                                                                                                      |                                                                         |                                                   |
| 3  |                      |      |          |     |                              |              |     |    |           |                                                                                                                                                      |                                                                         |                                                   |
| 4  | Chen <sup>111</sup>  | 2018 | Medicine | 2.0 | Medicine, General & Internal | Non-industry | 0/3 | 9  | 2009-2017 | Patients with sepsis                                                                                                                                 | Statins - 3 types                                                       | Placebo                                           |
| 5  |                      |      |          |     |                              |              |     |    |           |                                                                                                                                                      |                                                                         |                                                   |
| 6  |                      |      |          |     |                              |              |     |    |           |                                                                                                                                                      |                                                                         |                                                   |
| 7  |                      |      |          |     |                              |              |     |    |           |                                                                                                                                                      |                                                                         |                                                   |
| 8  |                      |      |          |     |                              |              |     |    |           |                                                                                                                                                      |                                                                         |                                                   |
| 9  | Ding <sup>112</sup>  | 2018 | Medicine | 2.0 | Medicine, General & Internal | No funding   | 0/6 | 6  | 2014-2017 | Patients with hormone receptor-positive or human epidermal growth factor receptor 2 negative advanced breast cancer                                  | Cyclin-dependent kinases 4/6 inhibitors - 3 types                       | Placebo                                           |
| 10 |                      |      |          |     |                              |              |     |    |           |                                                                                                                                                      |                                                                         |                                                   |
| 11 | Guo <sup>113</sup>   | 2018 | Medicine | 2.0 | Medicine, General & Internal | Non-industry | 0/8 | 5  | 2004-2017 | Adults undergoing total knee arthroplasty (TKA)                                                                                                      | Tranexamic acid (TXA)                                                   | Placebo, no treatment                             |
| 12 |                      |      |          |     |                              |              |     |    |           |                                                                                                                                                      |                                                                         |                                                   |
| 13 | Han <sup>114</sup>   | 2018 | Medicine | 2.0 | Medicine, General & Internal | Not reported | 0/7 | 18 | 2007-2016 | Patients with myocardial infarction                                                                                                                  | Statins - 3 types                                                       | Placebo                                           |
| 14 |                      |      |          |     |                              |              |     |    |           |                                                                                                                                                      |                                                                         |                                                   |
| 15 |                      |      |          |     |                              |              |     |    |           |                                                                                                                                                      |                                                                         |                                                   |
| 16 |                      |      |          |     |                              |              |     |    |           |                                                                                                                                                      |                                                                         |                                                   |
| 17 |                      |      |          |     |                              |              |     |    |           |                                                                                                                                                      |                                                                         |                                                   |
| 18 |                      |      |          |     |                              |              |     |    |           |                                                                                                                                                      |                                                                         |                                                   |
| 19 |                      |      |          |     |                              |              |     |    |           |                                                                                                                                                      |                                                                         |                                                   |
| 20 |                      |      |          |     |                              |              |     |    |           |                                                                                                                                                      |                                                                         |                                                   |
| 21 | Hu <sup>115</sup>    | 2018 | Medicine | 2.0 | Medicine, General & Internal | Not reported | 0/5 | 4  | 2010-2016 | Patients with acute coronary syndrome, percutaneous coronary intervention, or coronary stents given combination therapy with aspirin and clopidogrel | Proton pump inhibitors                                                  | Placebo                                           |
| 22 |                      |      |          |     |                              |              |     |    |           |                                                                                                                                                      |                                                                         |                                                   |
| 23 | Huang <sup>116</sup> | 2018 | Medicine | 2.0 | Medicine, General & Internal | Not reported | 0/5 | 18 | 2010-2015 | Patients with pterygium or glaucoma                                                                                                                  | Antivascular endothelial growth factor agents - 3 included              | Placebo, sham                                     |
| 24 |                      |      |          |     |                              |              |     |    |           |                                                                                                                                                      |                                                                         |                                                   |
| 25 | Jiang <sup>117</sup> | 2018 | Medicine | 2.0 | Medicine, General & Internal | Non-industry | 0/5 | 13 | 2010-2017 | Patients with diabetic peripheral neuropathy                                                                                                         | Fasudil + methylcobalamin or lipoic acid                                | Methylcobalamin or lipoic acid alone              |
| 26 |                      |      |          |     |                              |              |     |    |           |                                                                                                                                                      |                                                                         |                                                   |
| 27 |                      |      |          |     |                              |              |     |    |           |                                                                                                                                                      |                                                                         |                                                   |
| 28 | Jiang <sup>118</sup> | 2018 | Medicine | 2.0 | Medicine, General & Internal | Non-industry | 0/4 | 15 | 2011-2016 | Adult women with pathologically confirmed epithelial ovarian cancer                                                                                  | Antiangiogenic therapy (7 included) alone or combined with chemotherapy | Placebo or chemotherapy alone                     |
| 29 |                      |      |          |     |                              |              |     |    |           |                                                                                                                                                      |                                                                         |                                                   |
| 30 | Khan <sup>119</sup>  | 2018 | Medicine | 2.0 | Medicine, General & Internal | Non-industry | 0/8 | 7  | 2015-2017 | Patients with advanced non-small cell lung cancer                                                                                                    | Immune checkpoint inhibitors: anti-PD1/PD-L1 therapies - 3 types        | Chemotherapy - 6 regimens                         |
| 31 |                      |      |          |     |                              |              |     |    |           |                                                                                                                                                      |                                                                         |                                                   |
| 32 |                      |      |          |     |                              |              |     |    |           |                                                                                                                                                      |                                                                         |                                                   |
| 33 | Liang <sup>120</sup> | 2017 | Medicine | 2.0 | Medicine, General & Internal | No funding   | 0/4 | 3  | 2016-2017 | Patients undergoing total knee or hip arthroplasty                                                                                                   | Acetaminophen                                                           | Normal saline or placebo                          |
| 34 |                      |      |          |     |                              |              |     |    |           |                                                                                                                                                      |                                                                         |                                                   |
| 35 | Liu <sup>121</sup>   | 2018 | Medicine | 2.0 | Medicine, General & Internal | No funding   | 0/7 | 5  | 1999-2007 | Adults with social anxiety disorder                                                                                                                  | Fluvoxamine                                                             | Placebo                                           |
| 36 |                      |      |          |     |                              |              |     |    |           |                                                                                                                                                      |                                                                         |                                                   |
| 37 |                      |      |          |     |                              |              |     |    |           |                                                                                                                                                      |                                                                         |                                                   |
| 38 | Lor <sup>122</sup>   | 2017 | Medicine | 2.0 | Medicine, General & Internal | No funding   | 0/8 | 10 | 1999-2015 | Children and adults requiring nasogastric intubation                                                                                                 | Lidocaine                                                               | Normal saline, K-Y lubricant gel, or no treatment |
| 39 |                      |      |          |     |                              |              |     |    |           |                                                                                                                                                      |                                                                         |                                                   |
| 40 |                      |      |          |     |                              |              |     |    |           |                                                                                                                                                      |                                                                         |                                                   |
| 41 | Wang <sup>123</sup>  | 2017 | Medicine | 2.0 | Medicine, General & Internal | No funding   | 0/2 | 4  | 2015-2017 | Adults with intertrochanteric fractures preparing for internal fixation                                                                              | Tranexamic acid                                                         | Placebo, no treatment                             |
| 42 |                      |      |          |     |                              |              |     |    |           |                                                                                                                                                      |                                                                         |                                                   |
| 43 |                      |      |          |     |                              |              |     |    |           |                                                                                                                                                      |                                                                         |                                                   |
| 44 |                      |      |          |     |                              |              |     |    |           |                                                                                                                                                      |                                                                         |                                                   |
| 45 |                      |      |          |     |                              |              |     |    |           |                                                                                                                                                      |                                                                         |                                                   |
| 46 |                      |      |          |     |                              |              |     |    |           |                                                                                                                                                      |                                                                         |                                                   |
| 47 |                      |      |          |     |                              |              |     |    |           |                                                                                                                                                      |                                                                         |                                                   |

1  
2  
3  
4  
5  
6  
7  
8  
9  
10  
11  
12  
13  
14  
15  
16  
17  
18  
19  
20  
21  
22  
23  
24  
25  
26  
27  
28  
29  
30  
31  
32  
33  
34  
35  
36  
37  
38  
39  
40  
41  
42  
43  
44  
45  
46  
47

|                      |      |          |     |                              |              |     |                 |           |                                                                              |                                                                                                                                                                      |  |                                                                                    |
|----------------------|------|----------|-----|------------------------------|--------------|-----|-----------------|-----------|------------------------------------------------------------------------------|----------------------------------------------------------------------------------------------------------------------------------------------------------------------|--|------------------------------------------------------------------------------------|
|                      |      |          |     |                              |              |     |                 |           |                                                                              | (dynamic hip screws, proximal femoral nail antirotations)                                                                                                            |  |                                                                                    |
|                      |      |          |     |                              |              |     |                 |           |                                                                              |                                                                                                                                                                      |  | Placebo, octreotide, norepinephrine, dopamine + furosemide, octreotide + midodrine |
| Wang <sup>124</sup>  | 2018 | Medicine | 2.0 | Medicine, General & Internal | No funding   | 0/5 | 18              | 2001-2016 | Patients with hepatorenal syndrome                                           | Terlipressin                                                                                                                                                         |  |                                                                                    |
| Wang <sup>125</sup>  | 2018 | Medicine | 2.0 | Medicine, General & Internal | Not reported | 0/3 | 4               | 1993-2011 | Patients undergoing bronchoscopy                                             | Propofol                                                                                                                                                             |  | Midazolam<br>Chemotherapy, everolimus, ipilimumab                                  |
| Wei <sup>126</sup>   | 2017 | Medicine | 2.0 | Medicine, General & Internal | Not reported | 0/2 | 14              | 2015-2017 | Cancer patients<br>Women of reproductive age with primary dysmenorrhea       | PD-1 inhibitors - 2 types<br>Non-steroidal anti-inflammatory drugs, analgesics, oral contraceptives                                                                  |  |                                                                                    |
| Woo <sup>127</sup>   | 2018 | Medicine | 2.0 | Medicine, General & Internal | Non-industry | 0/7 | 34 <sup>P</sup> | 1998-2017 | Patients who were administered xenon versus propofol as a general anesthetic | Xenon                                                                                                                                                                |  | Acupuncture                                                                        |
| Xia <sup>128</sup>   | 2018 | Medicine | 2.0 | Medicine, General & Internal | Non-industry | 0/6 | 13              | 2004-2012 | Patients prepared for primary total hip arthroplasty (THA)                   |                                                                                                                                                                      |  | Propofol                                                                           |
| Yang <sup>129</sup>  | 2017 | Medicine | 2.0 | Medicine, General & Internal | Not reported | 0/4 | 7               | 2008-2016 | Patients undergoing laparoscopic cholecystectomy                             | Glucocorticoids - 3 types                                                                                                                                            |  | Placebo, no treatment                                                              |
| Ye <sup>130</sup>    | 2017 | Medicine | 2.0 | Medicine, General & Internal | Not reported | 0/3 | 5               | 2004-2016 | Adults with acute heart failure                                              | Ketamine                                                                                                                                                             |  | Placebo                                                                            |
| Yu <sup>131</sup>    | 2018 | Medicine | 2.0 | Medicine, General & Internal | No funding   | 0/6 | 8               | 2009-2017 | Patients with locoregionally advanced nasopharyngeal carcinoma               | Serelaxin                                                                                                                                                            |  | Placebo                                                                            |
| Yuan <sup>132</sup>  | 2018 | Medicine | 2.0 | Medicine, General & Internal | Non-industry | 0/9 | 31              | 1995-2016 |                                                                              | Neoadjuvant chemotherapy regimens - 16 included<br>Aspirin, aspirin + dipyridamole, aspirin + clopidogrel, aspirin + warfarin, cilostazol, warfarin, and ticlopidine |  | Network meta-analysis                                                              |
| Zhang <sup>133</sup> | 2018 | Medicine | 2.0 | Medicine, General & Internal | Not reported | 0/2 | 13              | 2001-2014 | Adults with cerebral infarction                                              |                                                                                                                                                                      |  | Network meta-analysis                                                              |
| Zhang <sup>134</sup> | 2018 | Medicine | 2.0 | Medicine, General & Internal | Non-industry | 0/8 | 10              | 1989-2006 | Healthy volunteers and people with congestive heart failure                  | Histamine H2 antagonists - 5 types                                                                                                                                   |  | Placebo, other conventional therapy medicines - 3 types                            |
| Zhao <sup>135</sup>  | 2018 | Medicine | 2.0 | Medicine, General & Internal | Not reported | 0/7 | 5               | 2008-2017 | Adult patients prepared to undergo laparoscopic cholecystectomy              | Lidocaine                                                                                                                                                            |  | Placebo, saline                                                                    |
| Zhao <sup>136</sup>  | 2018 | Medicine | 2.0 | Medicine, General & Internal | No funding   | 0/3 | 4               | 2013-2017 | Patients with a diagnosis of                                                 | Nefopam                                                                                                                                                              |  | Saline or usual care                                                               |

|    |                                     |      |                                          |     |                                                                         |              |                |    |           |                                                                                                                                                                                   |                                                                                                             |                                                                                                |
|----|-------------------------------------|------|------------------------------------------|-----|-------------------------------------------------------------------------|--------------|----------------|----|-----------|-----------------------------------------------------------------------------------------------------------------------------------------------------------------------------------|-------------------------------------------------------------------------------------------------------------|------------------------------------------------------------------------------------------------|
| 1  |                                     |      |                                          |     |                                                                         |              |                |    |           |                                                                                                                                                                                   |                                                                                                             |                                                                                                |
| 2  |                                     |      |                                          |     |                                                                         |              |                |    |           |                                                                                                                                                                                   |                                                                                                             |                                                                                                |
| 3  |                                     |      |                                          |     |                                                                         |              |                |    |           |                                                                                                                                                                                   |                                                                                                             |                                                                                                |
| 4  |                                     |      |                                          |     |                                                                         |              |                |    |           |                                                                                                                                                                                   |                                                                                                             |                                                                                                |
| 5  |                                     |      |                                          |     |                                                                         |              |                |    |           |                                                                                                                                                                                   |                                                                                                             |                                                                                                |
| 6  |                                     |      |                                          |     |                                                                         |              |                |    |           |                                                                                                                                                                                   |                                                                                                             |                                                                                                |
| 7  |                                     |      |                                          |     |                                                                         |              |                |    |           |                                                                                                                                                                                   |                                                                                                             |                                                                                                |
| 8  |                                     |      |                                          |     |                                                                         |              |                |    |           |                                                                                                                                                                                   |                                                                                                             |                                                                                                |
| 9  |                                     |      |                                          |     |                                                                         |              |                |    |           |                                                                                                                                                                                   |                                                                                                             |                                                                                                |
| 10 |                                     |      |                                          |     |                                                                         |              |                |    |           |                                                                                                                                                                                   |                                                                                                             |                                                                                                |
| 11 | Zhou <sup>137</sup>                 | 2018 | Medicine                                 | 2.0 | Medicine, General & Internal                                            | No funding   | 0/4            | 6  | 2013-2017 | symptomatic cholelithiasis and acute cholecystitis who prepared for laparoscopic cholecystectomy<br>Adults with end-staged knee osteoarthritis undergoing total knee arthroplasty | Dexamethasone                                                                                               | Placebo, no treatment                                                                          |
| 12 |                                     |      |                                          |     |                                                                         |              |                |    |           |                                                                                                                                                                                   |                                                                                                             |                                                                                                |
| 13 |                                     |      |                                          |     |                                                                         |              |                |    |           |                                                                                                                                                                                   |                                                                                                             |                                                                                                |
| 14 | Zhu <sup>138</sup>                  | 2018 | Medicine                                 | 2.0 | Medicine, General & Internal                                            | Not reported | 0/3            | 8  | 2002-2016 | Patients who underwent total hip arthroplasty                                                                                                                                     | Selective non-steroidal anti-inflammatory drugs (selective COX-2 inhibitors) - 4 types                      | Non-selective non-steroidal anti-inflammatory drugs (non-selective COX-2 inhibitors) - 4 types |
| 15 |                                     |      | Postgraduate                             |     |                                                                         |              |                |    |           |                                                                                                                                                                                   |                                                                                                             |                                                                                                |
| 16 | Zhou <sup>139</sup>                 | 2018 | Medicine                                 | 2.1 | Medicine, General & Internal                                            | No funding   | 0/5            | 10 | 2007-2017 | Patients with dyslipidemia                                                                                                                                                        | Anacetrapib                                                                                                 | Placebo, placebo + usual care                                                                  |
| 17 |                                     |      |                                          |     |                                                                         |              |                |    |           |                                                                                                                                                                                   |                                                                                                             |                                                                                                |
| 18 |                                     |      |                                          |     |                                                                         |              |                |    |           |                                                                                                                                                                                   |                                                                                                             |                                                                                                |
| 19 |                                     |      | Revista da Associação Médica Brasileira  |     |                                                                         |              |                |    |           |                                                                                                                                                                                   |                                                                                                             |                                                                                                |
| 20 |                                     |      |                                          |     |                                                                         |              |                |    |           |                                                                                                                                                                                   |                                                                                                             |                                                                                                |
| 21 | Zhang <sup>140</sup>                | 2018 | Medicine                                 | 0.7 | Medicine, General & Internal                                            | Non-industry | Not reported/6 | 6  | 2012-2016 | Patients with complicated intra-abdominal infections and complicated urinary tract infections                                                                                     | Ceftazidime-avibactam                                                                                       | Other antibiotics - 3 types, usual care                                                        |
| 22 | <b>Specialty medicine (n = 100)</b> |      |                                          |     |                                                                         |              |                |    |           |                                                                                                                                                                                   |                                                                                                             |                                                                                                |
| 23 |                                     |      |                                          |     |                                                                         |              |                |    |           |                                                                                                                                                                                   |                                                                                                             |                                                                                                |
| 24 |                                     |      | Acta Ophthalmologica                     |     |                                                                         |              |                |    |           |                                                                                                                                                                                   |                                                                                                             |                                                                                                |
| 25 | Li <sup>141</sup>                   | 2018 |                                          | 3.3 | Ophthalmology                                                           | Non-industry | Not reported/3 | 72 | 1995-2015 | Patients with primary open-angle glaucoma or ocular hypertension                                                                                                                  | Prostaglandin analogues, alpha-2 adrenergic agonists, beta-blockers, carbonic anhydrase inhibitors, miotics | Placebo - Network meta-analysis                                                                |
| 26 |                                     |      |                                          |     |                                                                         |              |                |    |           |                                                                                                                                                                                   |                                                                                                             |                                                                                                |
| 27 |                                     |      | American Heart Journal                   |     |                                                                         |              |                |    |           |                                                                                                                                                                                   |                                                                                                             |                                                                                                |
| 28 | Tarantini <sup>142</sup>            | 2018 |                                          | 4.2 | Cardiovascular Systems                                                  | No funding   | 0/7            | 5  | 2007-2016 | Patients with acute coronary syndrome                                                                                                                                             | P2Y12 receptor inhibitors - 2 types                                                                         | Clopidogrel                                                                                    |
| 29 |                                     |      |                                          |     |                                                                         |              |                |    |           |                                                                                                                                                                                   |                                                                                                             |                                                                                                |
| 30 |                                     |      | American Journal of Cardiovascular Drugs |     |                                                                         |              |                |    |           |                                                                                                                                                                                   |                                                                                                             |                                                                                                |
| 31 | Wang <sup>143</sup>                 | 2018 |                                          | 2.7 | Cardiovascular Systems; Pharmacology & Pharmacy                         | Non-industry | 0/3            | 5  | 2014-2017 | Adults aged 18–65 years with hyperlipidemia                                                                                                                                       | Inclisiran                                                                                                  | Placebo, other lipid-lowering agents - Network meta-analysis                                   |
| 32 |                                     |      |                                          |     |                                                                         |              |                |    |           |                                                                                                                                                                                   |                                                                                                             |                                                                                                |
| 33 |                                     |      |                                          |     |                                                                         |              |                |    |           |                                                                                                                                                                                   |                                                                                                             |                                                                                                |
| 34 |                                     |      | Anaesthesia and Intensive Care           |     |                                                                         |              |                |    |           |                                                                                                                                                                                   |                                                                                                             |                                                                                                |
| 35 | Aman <sup>144</sup>                 | 2018 |                                          | 1.7 | Anesthesiology; Critical Care Medicine                                  | Non-industry | Not reported/5 | 10 | 1995-2015 | Patients undergoing caesarean section under general anaesthesia                                                                                                                   | Opioid analgesics - 3 types, non-opioid analgesics - 5 types                                                | Placebo                                                                                        |
| 36 |                                     |      |                                          |     |                                                                         |              |                |    |           |                                                                                                                                                                                   |                                                                                                             |                                                                                                |
| 37 | Li <sup>145</sup>                   | 2018 | Autoimmunity Reviews                     | 8.7 | Immunology                                                              | Non-industry | 0/7            | 15 | 2004-2017 | Patients with rheumatoid arthritis                                                                                                                                                | Statins - 2 types                                                                                           | Conventional treatment, placebo + conventional treatment                                       |
| 38 |                                     |      |                                          |     |                                                                         |              |                |    |           |                                                                                                                                                                                   |                                                                                                             |                                                                                                |
| 39 |                                     |      | Biomed Research International            |     |                                                                         |              |                |    |           |                                                                                                                                                                                   |                                                                                                             |                                                                                                |
| 40 |                                     |      |                                          |     |                                                                         |              |                |    |           |                                                                                                                                                                                   |                                                                                                             |                                                                                                |
| 41 | Wang <sup>146</sup>                 | 2018 |                                          | 2.6 | Biotechnology & Applied Microbiology; Medicine, Research & Experimental | Non-industry | 0/4            | 15 | 2006-2017 | Patients with left ventricular dysfunction undergoing cardiac surgery                                                                                                             | Levosimendan                                                                                                | Placebo, milrinone, dopamine, intra-aortic balloon pump (IABP), and standard inotropic agents  |
| 42 |                                     |      |                                          |     |                                                                         |              |                |    |           |                                                                                                                                                                                   |                                                                                                             |                                                                                                |
| 43 |                                     |      |                                          |     |                                                                         |              |                |    |           |                                                                                                                                                                                   |                                                                                                             |                                                                                                |
| 44 |                                     |      |                                          |     |                                                                         |              |                |    |           |                                                                                                                                                                                   |                                                                                                             |                                                                                                |
| 45 |                                     |      |                                          |     |                                                                         |              |                |    |           |                                                                                                                                                                                   |                                                                                                             |                                                                                                |
| 46 |                                     |      |                                          |     |                                                                         |              |                |    |           |                                                                                                                                                                                   |                                                                                                             |                                                                                                |
| 47 |                                     |      |                                          |     |                                                                         |              |                |    |           |                                                                                                                                                                                   |                                                                                                             |                                                                                                |

1  
2  
3  
4  
5  
6  
7  
8  
9  
10  
11  
12  
13  
14  
15  
16  
17  
18  
19  
20  
21  
22  
23  
24  
25  
26  
27  
28  
29  
30  
31  
32  
33  
34  
35  
36  
37  
38  
39  
40  
41  
42  
43  
44  
45  
46  
47

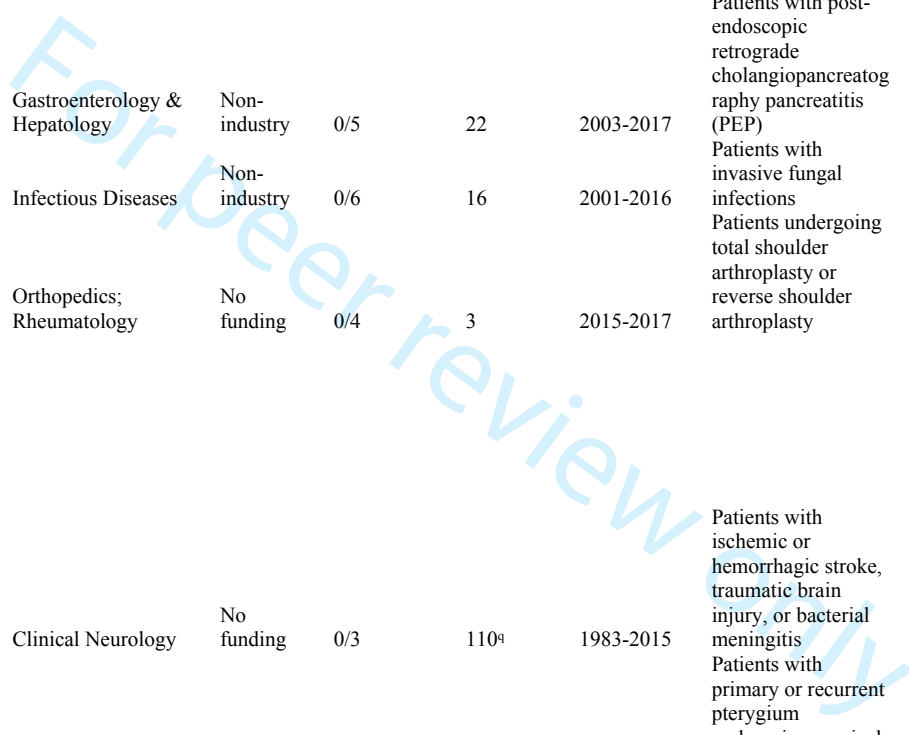

|                           |      |                               |     |                                     |              |     |                  |           |                                                                                                                                        |                                                                                                                                                                                                                                                                                                                                   |                                   |
|---------------------------|------|-------------------------------|-----|-------------------------------------|--------------|-----|------------------|-----------|----------------------------------------------------------------------------------------------------------------------------------------|-----------------------------------------------------------------------------------------------------------------------------------------------------------------------------------------------------------------------------------------------------------------------------------------------------------------------------------|-----------------------------------|
| Veettil <sup>147</sup>    | 2017 | BMC Cancer                    | 3.3 | Oncology                            | No funding   | 0/6 | 8                | 2003-2014 | Adults with history of colorectal cancer or adenoma                                                                                    | Aspirin, non-aspirin nonsteroidal anti-inflammatory drugs (NSAIDs)                                                                                                                                                                                                                                                                | Placebo, no treatment             |
| Bredemeier <sup>148</sup> | 2018 | BMC Cardiovascular Disorders  | 1.8 | Cardiac & Cardiovascular Systems    | No funding   | 0/9 | 91               | 1973-2017 | Adults under treatment for any clinical condition Patients with post-endoscopic retrograde cholangiopancreatography pancreatitis (PEP) | Purine-like xanthine oxidase inhibitors - 2 types, non-purine-like xanthine oxidase inhibitors - 2 types                                                                                                                                                                                                                          | Placebo, no treatment             |
| Lyu <sup>149</sup>        | 2018 | BMC Gastroenterology          | 2.7 | Gastroenterology & Hepatology       | Non-industry | 0/5 | 22               | 2003-2017 | Patients with invasive fungal infections                                                                                               | Nonsteroidal anti-inflammatory drugs (NSAIDs) - 6 types                                                                                                                                                                                                                                                                           | Placebo                           |
| Xing <sup>150</sup>       | 2017 | BMC Infectious Diseases       | 2.6 | Infectious Diseases                 | Non-industry | 0/6 | 16               | 2001-2016 | Patients undergoing total shoulder arthroplasty or reverse shoulder arthroplasty                                                       | Voriconazole                                                                                                                                                                                                                                                                                                                      | Other antifungal agents - 7 types |
| Kuo <sup>151</sup>        | 2018 | BMC Musculoskeletal Disorders | 2.0 | Orthopedics; Rheumatology           | No funding   | 0/4 | 3                | 2015-2017 | Patients with ischemic or hemorrhagic stroke, traumatic brain injury, or bacterial meningitis                                          | Tranexamic acid<br>Pharmacological agents for traumatic brain injury – 14 types, pharmacological agents for stroke – 23 types, pharmacological agents for bacterial meningitis – 1 type, pharmacological agents for intracerebral haemorrhage – 6 types, pharmacological agents for aneurysmal subarachnoid hemorrhage – 19 types | Placebo                           |
| Beez <sup>152</sup>       | 2017 | BMC Neurology                 | 2.2 | Clinical Neurology                  | No funding   | 0/3 | 110 <sup>a</sup> | 1983-2015 | Patients with primary or recurrent pterygium undergoing surgical removal combined with toxic agents                                    | Anti-fibrotic and anti-VEGF (vascular endothelial growth factor) medications - 3 types                                                                                                                                                                                                                                            | Unspecified control               |
| Zeng <sup>153</sup>       | 2017 | BMC Ophthalmology             | 1.8 | Ophthalmology                       | No funding   | 0/7 | 32               | 1990-2016 | Patients with acute coronary syndrome and patients who underwent percutaneous coronary intervention                                    |                                                                                                                                                                                                                                                                                                                                   | Placebo - Network meta-analysis   |
| Bundhun <sup>154</sup>    | 2017 | BMC Pharmacology & Toxicology | 1.9 | Pharmacology & Pharmacy; Toxicology | Non-industry | 0/3 | 4                | 2013-2016 |                                                                                                                                        | Prasugrel                                                                                                                                                                                                                                                                                                                         | Ticagrelor                        |



|    |                               |       |                                                  |      |                                   |                           |      |    |           |                                                                                                              |                                                                                                        |                                                                                                                                                      |
|----|-------------------------------|-------|--------------------------------------------------|------|-----------------------------------|---------------------------|------|----|-----------|--------------------------------------------------------------------------------------------------------------|--------------------------------------------------------------------------------------------------------|------------------------------------------------------------------------------------------------------------------------------------------------------|
| 1  |                               |       |                                                  |      |                                   |                           |      |    |           |                                                                                                              |                                                                                                        |                                                                                                                                                      |
| 2  |                               |       |                                                  |      |                                   |                           |      |    |           |                                                                                                              |                                                                                                        |                                                                                                                                                      |
| 3  |                               |       |                                                  |      |                                   |                           |      |    |           |                                                                                                              |                                                                                                        |                                                                                                                                                      |
| 4  |                               |       |                                                  |      |                                   |                           |      |    |           | People with schizophrenia or related disorders that had a duration of treatment that was no more than 1 year |                                                                                                        |                                                                                                                                                      |
| 5  |                               |       |                                                  |      |                                   |                           |      |    |           | Patients with acute exacerbations of chronic obstructive pulmonary disease (COPD)                            |                                                                                                        |                                                                                                                                                      |
| 6  |                               |       | BMC Psychiatry                                   | 2.4  | Psychiatry                        | No funding                | 0/11 | 47 | 2003-2015 |                                                                                                              | Antipsychotic drugs - 12 types                                                                         | Placebo - Network meta-analysis                                                                                                                      |
| 7  | Zhang <sup>155</sup>          | 2017  |                                                  |      |                                   |                           |      |    |           |                                                                                                              |                                                                                                        |                                                                                                                                                      |
| 8  |                               |       |                                                  |      |                                   |                           |      |    |           |                                                                                                              |                                                                                                        |                                                                                                                                                      |
| 9  |                               |       | BMC Pulmonary Medicine                           | 2.7  | Respiratory System                | No funding                | 0/5  | 19 | 1996-2016 |                                                                                                              | Antibiotics - 17 types                                                                                 | Placebo - Network meta-analysis                                                                                                                      |
| 10 | Zhang <sup>156</sup>          | 2017  |                                                  |      |                                   |                           |      |    |           |                                                                                                              |                                                                                                        |                                                                                                                                                      |
| 11 |                               |       | BMC Pulmonary Medicine                           | 2.7  | Respiratory System                | Non-industry              | 0/4  | 25 | 1993-2016 | Preterm infants                                                                                              | Corticosteroids                                                                                        | Placebo                                                                                                                                              |
| 12 | Zhang <sup>157</sup>          | 2017b |                                                  |      |                                   |                           |      |    |           | Post-menopausal women with metastatic HR-positive, HER2-negative breast cancer                               | Cyclin-dependent kinase 4/6 inhibitors - 3 types + aromatase inhibitor - 2 types                       |                                                                                                                                                      |
| 13 |                               |       |                                                  |      | Oncology; Obstetrics & Gynecology | No funding                | 0/4  | 3  | 2016-2017 | Patients with osteoarthritis in any joint                                                                    | Non-steroidal anti-inflammatory drugs - 9 types                                                        | Aromatase inhibitors - 2 types                                                                                                                       |
| 14 |                               |       |                                                  |      |                                   |                           |      |    |           |                                                                                                              |                                                                                                        |                                                                                                                                                      |
| 15 |                               |       |                                                  |      |                                   |                           |      |    |           |                                                                                                              |                                                                                                        |                                                                                                                                                      |
| 16 | Ramos-Esquivel <sup>158</sup> | 2018  | Breast Cancer British Journal of Sports Medicine | 1.8  |                                   | Non-industry              | 0/12 | 36 | 1979-2016 |                                                                                                              |                                                                                                        | Network meta-analysis FOLFOX (leucovorin + fluorouracil + oxaliplatin) + bevacizumab, FOLFIRI (leucovorin + fluorouracil + irinotecan) + bevacizumab |
| 17 |                               |       |                                                  |      |                                   |                           |      |    |           |                                                                                                              |                                                                                                        |                                                                                                                                                      |
| 18 | Zeng <sup>159</sup>           | 2018  |                                                  | 7.9  | Sport Sciences                    |                           |      |    |           |                                                                                                              |                                                                                                        | Miltefosine, paromomycin, antimonial compounds - 2 types, pentamidine, sitamaquine                                                                   |
| 19 |                               |       |                                                  |      |                                   |                           |      |    |           |                                                                                                              |                                                                                                        | Placebo, nonsteroidal anti-inflammatory drugs (NSAIDs), disease modifying antirheumatic drugs (DMARDs)                                               |
| 20 |                               |       | Cellular Physiology and Biochemistry             | 5.5  | Cell Biology; Physiology          | Not reported              | 0/6  | 4  | 2015-2017 | Patients with metastatic colorectal cancer                                                                   | FOLFOXIRI (leucovorin + fluorouracil + oxaliplatin + irinotecan) + bevacizumab                         |                                                                                                                                                      |
| 21 | Shui <sup>160</sup>           | 2018  |                                                  |      |                                   |                           |      |    |           |                                                                                                              |                                                                                                        |                                                                                                                                                      |
| 22 |                               |       |                                                  |      |                                   |                           |      |    |           |                                                                                                              |                                                                                                        |                                                                                                                                                      |
| 23 |                               |       |                                                  |      |                                   |                           |      |    |           |                                                                                                              |                                                                                                        |                                                                                                                                                      |
| 24 |                               |       |                                                  |      |                                   |                           |      |    |           |                                                                                                              |                                                                                                        |                                                                                                                                                      |
| 25 |                               |       |                                                  |      |                                   |                           |      |    |           |                                                                                                              |                                                                                                        |                                                                                                                                                      |
| 26 | Rodrigo <sup>161</sup>        | 2018  | Clinical Microbiology and Infection              | 5.4  | Infectious Diseases; Microbiology | No funding                | 0/4  | 28 | 1996-2017 | Patients with visceral leishmaniasis                                                                         | Amphotericin B                                                                                         |                                                                                                                                                      |
| 27 |                               |       |                                                  |      |                                   |                           |      |    |           |                                                                                                              |                                                                                                        |                                                                                                                                                      |
| 28 |                               |       |                                                  |      |                                   |                           |      |    |           |                                                                                                              |                                                                                                        |                                                                                                                                                      |
| 29 |                               |       |                                                  |      |                                   |                           |      |    |           |                                                                                                              |                                                                                                        |                                                                                                                                                      |
| 30 |                               |       |                                                  |      |                                   |                           |      |    |           |                                                                                                              |                                                                                                        |                                                                                                                                                      |
| 31 |                               |       |                                                  |      |                                   |                           |      |    |           |                                                                                                              |                                                                                                        |                                                                                                                                                      |
| 32 |                               |       |                                                  |      |                                   |                           |      |    |           |                                                                                                              |                                                                                                        |                                                                                                                                                      |
| 33 |                               |       |                                                  |      |                                   |                           |      |    |           |                                                                                                              |                                                                                                        |                                                                                                                                                      |
| 34 | Wang <sup>162</sup>           | 2018  | Clinical Rheumatology                            | 2.1  | Rheumatology                      | Non-industry              | 0/3  | 25 | 2002-2014 | Patients with ankylosing spondylitis and non-radiographic axial spondyloarthritis                            | Tumor necrosis factor (TNF) inhibitors - 5 types, non-tumor necrosis factor (TNF) inhibitors - 2 types |                                                                                                                                                      |
| 35 |                               |       |                                                  |      |                                   |                           |      |    |           |                                                                                                              | Low molecular-weight heparin (LMWH) - 5 types, enoxaparin + vitamin K antagonists (VKA)                |                                                                                                                                                      |
| 36 |                               |       |                                                  |      |                                   |                           |      |    |           |                                                                                                              |                                                                                                        |                                                                                                                                                      |
| 37 |                               |       | Critical Reviews in Oncology / Hematology        | 4.5  | Oncology; Hematology              | No funding                | 1/5  | 13 | 1996-2015 | Adults with acute venous thromboembolism                                                                     | Proprotein convertase subtilisin/kexin type 9 gene inhibitors (PCSK9i)                                 | Rivaroxaban, unfractionated heparin (UFH)                                                                                                            |
| 38 | Hong <sup>163</sup>           | 2018  |                                                  |      |                                   |                           |      |    |           |                                                                                                              |                                                                                                        | Placebo, placebo + other lipid-lowering therapy                                                                                                      |
| 39 |                               |       |                                                  |      |                                   |                           |      |    |           |                                                                                                              |                                                                                                        |                                                                                                                                                      |
| 40 | de Carvalho <sup>164</sup>    | 2018  | Diabetes Care                                    | 13.4 | Endocrinology & Metabolism        | Not reported <sup>f</sup> | 0/3  | 20 | 2012-2017 | Patients with familial or nonfamilial                                                                        |                                                                                                        |                                                                                                                                                      |
| 41 |                               |       |                                                  |      |                                   |                           |      |    |           |                                                                                                              |                                                                                                        |                                                                                                                                                      |
| 42 |                               |       |                                                  |      |                                   |                           |      |    |           |                                                                                                              |                                                                                                        |                                                                                                                                                      |
| 43 |                               |       |                                                  |      |                                   |                           |      |    |           |                                                                                                              |                                                                                                        |                                                                                                                                                      |
| 44 |                               |       |                                                  |      |                                   |                           |      |    |           |                                                                                                              |                                                                                                        |                                                                                                                                                      |
| 45 |                               |       |                                                  |      |                                   |                           |      |    |           |                                                                                                              |                                                                                                        |                                                                                                                                                      |
| 46 |                               |       |                                                  |      |                                   |                           |      |    |           |                                                                                                              |                                                                                                        |                                                                                                                                                      |
| 47 |                               |       |                                                  |      |                                   |                           |      |    |           |                                                                                                              |                                                                                                        |                                                                                                                                                      |

1  
2  
3  
4  
5  
6  
7  
8  
9  
10  
11  
12  
13  
14  
15  
16  
17  
18  
19  
20  
21  
22  
23  
24  
25  
26  
27  
28  
29  
30  
31  
32  
33  
34  
35  
36  
37  
38  
39  
40  
41  
42  
43  
44  
45  
46  
47

|                            |      |                                            |      |                                               |              |                |    |           |                                                                                                                                                                                                   |                                                                                                 |                                                      |
|----------------------------|------|--------------------------------------------|------|-----------------------------------------------|--------------|----------------|----|-----------|---------------------------------------------------------------------------------------------------------------------------------------------------------------------------------------------------|-------------------------------------------------------------------------------------------------|------------------------------------------------------|
|                            |      |                                            |      |                                               |              |                |    |           | hypercholesterolemi<br>a                                                                                                                                                                          |                                                                                                 |                                                      |
| Jaafar <sup>165</sup>      | 2018 | Digestive Diseases and Sciences            | 2.8  | Gastroenterology & Hepatology                 | Not reported | 0/5            | 17 | 2000-2016 | Adults (18 and over) with organic or functional dyspepsia                                                                                                                                         | Rebamipide                                                                                      | Placebo, standard treatment, no treatment            |
| Liu <sup>166</sup>         | 2018 | Drug Delivery                              | 3.1  | Pharmacology & Pharmacy                       | Not reported | 0/2            | 9  | 2002-2015 | Patients with neurodegenerative movement disorders                                                                                                                                                | Riluzole                                                                                        | Placebo                                              |
| Liu <sup>167</sup>         | 2018 | Drug Design, Development and Therapy       | 2.9  | Chemistry, Medicinal; Pharmacology & Pharmacy | Not reported | 0/5            | 9  | 2010-2016 | Patients undergoing coronary angiography (CAG) or percutaneous coronary intervention (PCI)                                                                                                        | Atorvastatin                                                                                    | Placebo                                              |
| Sun <sup>168</sup>         | 2017 | Drug Design, Development and Therapy       | 2.9  | Chemistry, Medicinal; Pharmacology & Pharmacy | Not reported | 0/5            | 9  | 2009-2016 | Adults (≥ 18 years) undergoing spinal anesthesia                                                                                                                                                  | Dexmedetomidine                                                                                 | Fentanyl                                             |
| Paraschakis <sup>169</sup> | 2017 | East Asian Archives of Psychiatry          | None | Not applicable                                | Not reported | 0/2            | 4  | 2005-2010 | Adults with traumatic brain injuries and depressive disorders                                                                                                                                     | Antidepressants - 2 types                                                                       | Placebo                                              |
| D'Souza <sup>170</sup>     | 2018 | Emergency Medicine Journal                 | 2.0  | Emergency Medicine                            | No funding   | 0/8            | 4  | 2001-2016 | Patients taking acute antiemetic drugs                                                                                                                                                            | Diphenhydramine                                                                                 | Placebo                                              |
| Mei <sup>171</sup>         | 2016 | European Journal of Gynecological Oncology | 0.6  | Oncology; Obstetrics & Gynecology             | Not reported | Not reported/4 | 4  | 2004-2013 | Adult women with epithelial ovarian cancer, fallopian tube cancer, or primary peritoneal cancer who have achieved complete clinical remission after debulking surgery and first-line chemotherapy | CA125-targeted antibody – 2 types                                                               | Placebo                                              |
| Verberkt <sup>172</sup>    | 2017 | European Respiratory Journal               | 12.2 | Respiratory System                            | Non-industry | 3/9*           | 35 | 1982-2015 | Patients with chronic breathlessness                                                                                                                                                              | Opioids - 8 types                                                                               | Placebo                                              |
| Sridharan <sup>173</sup>   | 2018 | Expert Opinion on Pharmacotherapy          | 3.5  | Pharmacology & Pharmacy                       | No funding   | 0/3            | 51 | 1980-2016 | Critically ill patients receiving stress ulcer prophylaxis (SUP)                                                                                                                                  | Antacids, proton pump inhibitors (PPI), histamine-2 receptor antagonists (H2RA), and sucralfate | Placebo - Network meta-analysis                      |
| Habibi <sup>174</sup>      | 2018 | Expert Review of Clinical Pharmacology     | 2.8  | Pharmacology & Pharmacy                       | No funding   | 0/4            | 5  | 1999-2012 | Patients undergoing coronary artery bypass surgery                                                                                                                                                | Lidocaine                                                                                       | Placebo                                              |
| Li <sup>175</sup>          | 2018 | Expert Review of Clinical Pharmacology     | 2.8  | Pharmacology & Pharmacy                       | Non-industry | 0/4            | 14 | 2002-2017 | Patients with stable angina pectoris requiring elective percutaneous                                                                                                                              | Nicorandil                                                                                      | Placebo (saline, isosorbide dinitrate), no treatment |

|    |                         |      |                    |      |                     |          |            |    |           |                      |                             |                       |
|----|-------------------------|------|--------------------|------|---------------------|----------|------------|----|-----------|----------------------|-----------------------------|-----------------------|
| 1  |                         |      |                    |      |                     |          |            |    |           |                      |                             |                       |
| 2  |                         |      |                    |      |                     |          |            |    |           |                      |                             |                       |
| 3  |                         |      |                    |      |                     |          |            |    |           |                      |                             |                       |
| 4  |                         |      |                    |      |                     |          |            |    |           | coronary             |                             |                       |
| 5  |                         |      | Expert Review      |      |                     |          |            |    |           | intervention (PCI)   |                             |                       |
| 6  | Sangroongruang          | 2018 | of Clinical        | 2.8  | Pharmacology &      | Non-     | 0/5        | 11 | 2010-2017 | Patients diagnosed   | Anti-vascular endothelial   | Sham injection -      |
| 7  | sri <sup>176</sup>      |      | Pharmacology       |      | Pharmacy            | industry |            |    |           | with retinal vein    | growth factor (VEGF)        | Network meta-analysis |
| 8  |                         |      |                    |      |                     |          |            |    |           | occlusion            | drugs - 3 types             |                       |
| 9  |                         |      |                    |      |                     |          |            |    |           | Adult patients with  |                             |                       |
| 10 | Hickey <sup>177</sup>   | 2018 | Foot and Ankle     | 1.5  | Orthopedics         | Not      | 0/7        | 7  | 1993-2015 | foot or ankle trauma | Low molecular weight        | Placebo, no treatment |
| 11 |                         |      | Surgery            |      | Oncology;           | reported |            |    |           | treated with below   | heparin - 5 types           |                       |
| 12 | Zhao <sup>178</sup>     | 2018 | Gastric Cancer     | 5.0  | Gastroenterology &  | Non-     | 0/9        | 16 | 2002-2017 | immobilization       | Targeted agents - 11 types, | Placebo - Network     |
| 13 |                         |      |                    |      | Hepatology          | industry |            |    |           | Patients with        | targeted agents +           | meta-analysis         |
| 14 |                         |      |                    |      |                     |          |            |    |           | advanced gastric     | chemotherapy                |                       |
| 15 | Khera <sup>179</sup>    | 2018 | Gastroenterolog    | 20.8 | Gastroenterology &  | No       | 0/9        | 29 | 1998-2015 | cancer               | Orlistat, loracaserin,      | Placebo - Network     |
| 16 |                         |      | y                  |      | Hepatology          | funding  |            |    |           | Obese and            | naltrexone-bupropion,       | meta-analysis         |
| 17 |                         |      |                    |      |                     |          |            |    |           | overweight adults    | phentermine-topiramate,     |                       |
| 18 |                         |      |                    |      |                     |          |            |    |           | (18 years and over)  | liraglutide                 |                       |
| 19 | Li <sup>180</sup>       | 2018 | Gynecologic        | 4.5  | Oncology;           | Non-     | 0/6        | 7  | 2005-2016 | Patients with low-   | Methotrexate (MEX) based    | Network meta-analysis |
| 20 |                         |      | Oncology           |      | Obstetrics &        | industry |            |    |           | risk gestational     | chemotherapy regimens,      |                       |
| 21 | Zhuge <sup>181</sup>    | 2018 | Helicobacter       | 4.1  | Gynecology          | Non-     | 0/6        | 18 | 1999-2016 | trophoblastic        | actinomycin-d (Act-D)       | Other antibiotics - 7 |
| 22 |                         |      | Indian Journal     |      | Gastroenterology &  | industry |            |    |           | neoplasia (LRGTN)    | based chemotherapy          | types                 |
| 23 | Kim <sup>182</sup>      | 2017 | of Cancer          | 0.7  | Hepatology;         | No       | 0/4        | 21 | 1993-2011 | Patients with        | regimens                    | Placebo               |
| 24 |                         |      |                    |      | Microbiology        | funding  |            |    |           | helicobacter pylori  |                             |                       |
| 25 |                         |      | Indian Journal     |      | Oncology            |          |            |    |           | infection            | Furazolidone                |                       |
| 26 | Garg <sup>183</sup>     | 2018 | of Gastroenterolog | None | Not applicable      | Not      | 0/4        | 6  | 2007-2016 | Adults at risk of    | Statins - 7 types           | Placebo               |
| 27 |                         |      | y                  |      |                     | reported |            |    |           | developing cancer    |                             |                       |
| 28 |                         |      |                    |      |                     |          |            |    |           | Patients undergoing  |                             |                       |
| 29 | Rosanova <sup>184</sup> | 2017 | Infectious         | 1.9  | Infectious Diseases | Not      | 0/5        | 7  | 2002-2011 | endoscopic           | Indomethacin                | Placebo               |
| 30 |                         |      | Diseases           |      |                     | reported |            |    |           | retrograde           |                             |                       |
| 31 | Yu <sup>185</sup>       | 2018 | Inflammopharm      | 3.3  | Immunology;         | Non-     | 0/6        | 3  | 2007-2016 | cholangiopancreatog  | Immunosuppressed            | Other antifungal      |
| 32 |                         |      | acology            |      | Toxicology          | industry |            |    |           | raphy                | haematology-                | agents or placebo     |
| 33 |                         |      |                    |      |                     |          |            |    |           | Adults (17 years and | oncology patients           | Non-steroidal anti-   |
| 34 | Kakkos <sup>186</sup>   | 2018 | International      | 1.2  | Peripheral Vascular | Not      | 2/2        | 7  | 1982-2015 | over) diagnosed      | Voriconazole                | inflammatory drugs    |
| 35 |                         |      | Angiology          |      | Disease             | reported |            |    |           | with acute gout      | Prednisolone                | (NSAIDs) - 2 types    |
| 36 | Ou <sup>187</sup>       | 2018 | International      | 3.1  | Immunology;         | No       | Not        | 8  | 2014-2017 | Patients with        |                             |                       |
| 37 |                         |      | Immunopharma       |      | Pharmacology &      | funding  | reported/5 |    |           | chronic venous       | Micronized purified         | Placebo               |
| 38 |                         |      | cology             |      | Pharmacy            |          |            |    |           | disorders (CVD) or   | flavonoid faction (Daflon)  |                       |
| 39 |                         |      |                    |      |                     |          |            |    |           | venous edema         |                             |                       |
| 40 | Yin <sup>188</sup>      | 2018 | International      | 3.1  | Immunology;         | No       | 0/4        | 53 | 1984-2017 | Adults with          | Dupilumab                   | Placebo               |
| 41 |                         |      | Immunopharma       |      | Pharmacology &      | funding  |            |    |           | moderate-to-severe   |                             |                       |
| 42 |                         |      | cology             |      | Pharmacy            |          |            |    |           | atopic dermatitis    | Broncho-Vaxom               | Placebo, routine      |
| 43 |                         |      |                    |      |                     |          |            |    |           | Children diagnosed   |                             | therapies             |
| 44 |                         |      |                    |      |                     |          |            |    |           | with recurrent       |                             |                       |
| 45 |                         |      |                    |      |                     |          |            |    |           | respiratory tract    |                             |                       |
| 46 |                         |      |                    |      |                     |          |            |    |           | infections (RRTIs)   |                             |                       |
| 47 |                         |      |                    |      |                     |          |            |    |           |                      |                             |                       |

1  
2  
3  
4  
5  
6  
7  
8  
9  
10  
11  
12  
13  
14  
15  
16  
17  
18  
19  
20  
21  
22  
23  
24  
25  
26  
27  
28  
29  
30  
31  
32  
33  
34  
35  
36  
37  
38  
39  
40  
41  
42  
43  
44  
45  
46  
47

|                          |      |                                               |     |                                               |              |                |                |                   |                                                                                                                               |                                                                        |                                                                          |
|--------------------------|------|-----------------------------------------------|-----|-----------------------------------------------|--------------|----------------|----------------|-------------------|-------------------------------------------------------------------------------------------------------------------------------|------------------------------------------------------------------------|--------------------------------------------------------------------------|
| Zhu <sup>189</sup>       | 2018 | International Journal of Clinical Oncology    | 2.6 | Oncology                                      | Non-industry | 0/7            | 35             | 2005-2016         | Cancer patients                                                                                                               | Anti-EGFR monoclonal antibodies (EGFR-MoAbs)                           | Placebo, usual care                                                      |
| Liu <sup>190</sup>       | 2018 | International Journal of Neuroscience         | 1.8 | Neurosciences                                 | Not reported | 0/2            | 4              | 2007-2016         | Patients with seizures                                                                                                        | Lacosamide                                                             | Placebo                                                                  |
| Coccolini <sup>191</sup> | 2018 | International Journal of Surgery              | 2.7 | Surgery                                       | No funding   | 0/12           | 15             | 1993-2014         | Patients with advanced gastric and esophago-gastric cancer                                                                    | Neoadjuvant chemotherapy (with surgery)                                | No neoadjuvant chemotherapy (only surgery)                               |
| Fan <sup>192</sup>       | 2018 | International Journal of Surgery              | 2.7 | Surgery                                       | Non-industry | 0/8            | 7              | 2005-2016         | Patients with scheduled total knee arthroplasty                                                                               | Dexamethasone                                                          | Placebo, no treatment ("nothing controlled multimodal analgesia method") |
| Li <sup>193</sup>        | 2018 | International Journal of Surgery              | 2.7 | Surgery                                       | No funding   | 0/5            | 6              | 2008-2017         | Patients with a diagnosis of symptomatic cholelithiasis and acute cholecystitis who prepared for laparoscopic cholecystectomy | Lidocaine                                                              | Placebo, saline                                                          |
| Li <sup>194</sup>        | 2018 | International Journal of Surgery              | 2.7 | Surgery                                       | No funding   | 0/4            | 17             | 1998-2017         | Patients undergoing retrograde cholangiopancreatography                                                                       | Anaesthetic medications - 12 types                                     | No drug - Network meta-analysis                                          |
| Liu <sup>195</sup>       | 2018 | International Journal of Surgery              | 2.7 | Surgery                                       | Non-industry | 0/5            | 3 <sup>†</sup> | 2005-2017         | Patients undergoing total knee arthroplasty or total hip arthroplasty                                                         | Tranexamic acid                                                        | Aminocaproic acid                                                        |
| Ran <sup>196</sup>       | 2018 | International Journal of Surgery              | 2.7 | Surgery                                       | No funding   | 0/5            | 5              | 2002-2016         | Patients with symptomatic knee osteoarthritis                                                                                 | Hyaluronic acid                                                        | Methylprednisolone                                                       |
| Zhao <sup>197</sup>      | 2018 | International Journal of Surgery              | 2.7 | Surgery                                       | No funding   | 0/3            | 4 <sup>†</sup> | 2010-2017         | Patients with hepatocellular carcinoma                                                                                        | Anthracyclines                                                         | Platinum                                                                 |
| Zhu <sup>198</sup>       | 2018 | International Journal of Surgery              | 2.7 | Surgery                                       | Non-industry | 0/5            | 6              | 2004-2017         | Adult patients prepared for laparoscopic cholecystectomy                                                                      | Ketamine                                                               | Saline                                                                   |
| Wagner <sup>199</sup>    | 2018 | Journal of Affective Disorders                | 3.8 | Clinical Neurology; Psychiatry                | Non-industry | Not reported/6 | 119            | 1990- Unpublished | Adults with major depressive disorder                                                                                         | Second generation antidepressants - 16 types                           | Placebo - Network meta-analysis                                          |
| Hickman <sup>200</sup>   | 2018 | Journal of Assisted Reproduction and Genetics | 2.8 | Genetics & Heredity; Obstetrics & Gynecology; | Not reported | 0/5            | 10             | 2007-2016         | Women with lymphoma, ovarian cancer, or breast                                                                                | Gonadotropin-releasing hormone agonists (GnRH <sub>a</sub> ) - 7 types | Standard treatment (chemotherapy only)                                   |

1  
2  
3  
4  
5  
6  
7  
8  
9  
10  
11  
12  
13  
14  
15  
16  
17  
18  
19  
20  
21  
22  
23  
24  
25  
26  
27  
28  
29  
30  
31  
32  
33  
34  
35  
36  
37  
38  
39  
40  
41  
42  
43  
44  
45  
46  
47

Reproductive  
Biology  
cancer undergoing  
chemotherapy  
Programmed death 1 (PD-1)/programmed death ligand 1 (PD-L1) inhibitors - 3 types  
Chemotherapy - 2 types  
Patients with non-small-cell lung carcinoma  
Patients with metastatic castration-resistant prostate cancer  
Targeted agents - 16 types  
Placebo - Network meta-analysis  
Cancer patients with moderate to severe pain  
Adults (18 years and over) undergoing any type of cardiac surgery  
Fentanyl  
Morphine  
Placebo, discontinuation of aspirin greater than 7 days before surgery  
Aspirin  
Patients undergoing isolated coronary artery bypass graft (CABG) surgery  
Statins - 3 types  
Antiandrogens, insulin sensitizers, estrogen-progestin oral contraceptives pills (OCPs), OCPs + antiandrogen, OCPs + insulin sensitizer, antiandrogen + insulin sensitizer  
No preoperative statin  
Women with hirsutism  
Placebo - Network meta-analysis  
Patients with type 2 diabetes  
Adults with moderate-to-severe chronic plaque-type psoriasis  
Patients with onset of atrial fibrillation (AF) within 48 h, who were hemodynamically stable and without evidence of acute coronary syndrome,  
Flecainide  
Placebo - Network meta-analysis  
Placebo - Network meta-analysis  
Placebo - Network meta-analysis  
Placebo, verapamil, and other active anti-dysrhythmics

|                             |      |                                                  |     |                                                                        |              |                  |    |           |                                                                                                                                               |                                                                                                                                                                                                 |                                                                                       |
|-----------------------------|------|--------------------------------------------------|-----|------------------------------------------------------------------------|--------------|------------------|----|-----------|-----------------------------------------------------------------------------------------------------------------------------------------------|-------------------------------------------------------------------------------------------------------------------------------------------------------------------------------------------------|---------------------------------------------------------------------------------------|
|                             |      | Journal of Cancer Research and Clinical Oncology | 3.3 | Oncology                                                               | Non-industry | 0/4              | 8  | 2015-2017 | Patients with non-small-cell lung carcinoma                                                                                                   | Programmed death 1 (PD-1)/programmed death ligand 1 (PD-L1) inhibitors - 3 types                                                                                                                | Chemotherapy - 2 types                                                                |
| Luo <sup>201</sup>          | 2018 | Journal of Cancer Research and Clinical Oncology | 3.3 | Oncology                                                               | Non-industry | 0/5              | 26 | 2010-2017 | Patients with metastatic castration-resistant prostate cancer                                                                                 | Targeted agents - 16 types                                                                                                                                                                      | Placebo - Network meta-analysis                                                       |
| Wang <sup>202</sup>         | 2018 | Journal of Cancer Research and Therapeutics      | 0.8 | Oncology                                                               | No funding   | 0/4              | 35 | 1997-2011 | Cancer patients with moderate to severe pain<br>Adults (18 years and over) undergoing any type of cardiac surgery                             | Fentanyl                                                                                                                                                                                        | Morphine<br>Placebo,<br>discontinuation of aspirin greater than 7 days before surgery |
| Aboul-Hassan <sup>204</sup> | 2017 | Journal of Cardiac Surgery                       | 1.2 | Cardiac & Cardiovascular Systems; Surgery                              | No funding   | 0/8              | 12 | 1985-2016 | Patients undergoing isolated coronary artery bypass graft (CABG) surgery                                                                      | Aspirin                                                                                                                                                                                         | No preoperative statin                                                                |
| Wang <sup>205</sup>         | 2018 | Journal of Cardiovascular Surgery                | 1.2 | Cardiac & Cardiovascular Systems; Surgery; Peripheral Vascular Disease | Not reported | 0/6              | 5  | 1999-2010 | Women with hirsutism                                                                                                                          | Statins - 3 types<br>Antiandrogens, insulin sensitizers, estrogen-progestin oral contraceptives pills (OCPs), OCPs + antiandrogen, OCPs + insulin sensitizer, antiandrogen + insulin sensitizer | Placebo - Network meta-analysis                                                       |
| Barrionuevo <sup>206</sup>  | 2018 | Journal of Clinical Endocrinology and Metabolism | 5.8 | Endocrinology & Metabolism                                             | Non-industry | 0/8              | 32 | 1989-2016 | Patients with type 2 diabetes<br>Adults with moderate-to-severe chronic plaque-type psoriasis                                                 | Statin - 6 types                                                                                                                                                                                | Placebo - Network meta-analysis                                                       |
| Cui <sup>207</sup>          | 2018 | Journal of Clinical Pharmacy and Therapeutics    | 1.7 | Pharmacology & Pharmacy                                                | Not reported | 0/6              | 23 | 1993-2014 | Patients with onset of atrial fibrillation (AF) within 48 h, who were hemodynamically stable and without evidence of acute coronary syndrome, | Apremilast, biological therapies - 7 types                                                                                                                                                      | Placebo - Network meta-analysis                                                       |
| Sawyer <sup>208</sup>       | 2018 | Journal of Dermatological Treatment              | 2.1 | Dermatology                                                            | Industry     | 6/6 <sup>y</sup> | 54 | 2001-2016 | Patients with onset of atrial fibrillation (AF) within 48 h, who were hemodynamically stable and without evidence of acute coronary syndrome, | Flecainide                                                                                                                                                                                      | Placebo, verapamil, and other active anti-dysrhythmics                                |
| Markey <sup>209</sup>       | 2018 | Journal of Emergency Medicine                    | 1.2 | Emergency Medicine                                                     | Not reported | Not reported/3   | 11 | 1989-2004 |                                                                                                                                               |                                                                                                                                                                                                 |                                                                                       |

1  
2  
3  
4  
5  
6  
7  
8  
9  
10  
11  
12  
13  
14  
15  
16  
17  
18  
19  
20  
21  
22  
23  
24  
25  
26  
27  
28  
29  
30  
31  
32  
33  
34  
35  
36  
37  
38  
39  
40  
41  
42  
43  
44  
45  
46  
47

|                            |      |                                                     |     |                                            |              |                   |                 |           |                                                                                                                                                                                                     |                                                                                          |                                                    |
|----------------------------|------|-----------------------------------------------------|-----|--------------------------------------------|--------------|-------------------|-----------------|-----------|-----------------------------------------------------------------------------------------------------------------------------------------------------------------------------------------------------|------------------------------------------------------------------------------------------|----------------------------------------------------|
|                            |      | Journal of Gastrointestinal and Liver Diseases      | 2.0 | Gastroenterology & Hepatology              | Not reported | 0/15              | 10 <sup>w</sup> | 2009-2016 | congestive heart failure, or structural heart disease<br>Adult patients (18 years and over) taking low-dose aspirin for a minimum of 2 weeks<br>Patients with histologically confirmed solid cancer | Proton-pump inhibitors (PPIs) - 5 types                                                  | Histamine-2 receptor antagonists (H2RAs) - 2 types |
| Szabó <sup>210</sup>       | 2017 |                                                     |     |                                            |              |                   |                 |           |                                                                                                                                                                                                     |                                                                                          |                                                    |
|                            |      | Journal of Immunology                               | 3.3 | Immunology                                 | Non-industry | 0/6               | 15              | 2011-2017 |                                                                                                                                                                                                     | Immune checkpoint inhibitors (ICIs) - 5 types                                            | Placebo or chemotherapy                            |
| Su <sup>211</sup>          | 2018 |                                                     |     |                                            |              |                   |                 |           |                                                                                                                                                                                                     |                                                                                          |                                                    |
|                            |      | Journal of Interventional Cardiac Electrophysiology | 1.5 | Cardiac & Cardiovascular Systems           | Non-industry | 0/9               | 8               | 2006-2017 | Patients with persistent atrial fibrillation                                                                                                                                                        | Antiarrhythmic drugs                                                                     | Catheter ablation                                  |
| Chen <sup>212</sup>        | 2018 |                                                     |     |                                            |              |                   |                 |           |                                                                                                                                                                                                     |                                                                                          |                                                    |
|                            |      | Journal of Orthopaedic Surgery and Research         | 1.6 | Orthopedics                                | No funding   | 0/4               | 6               | 2008-2014 | Patients undergoing knee arthroscopy                                                                                                                                                                | Midazolam                                                                                | Placebo                                            |
| Chen <sup>213</sup>        | 2017 |                                                     |     |                                            |              |                   |                 |           |                                                                                                                                                                                                     |                                                                                          |                                                    |
|                            |      | Journal of Orthopaedic Surgery and Research         | 1.6 | Orthopedics                                | Not reported | 0/5               | 3 <sup>x</sup>  | 2002-2017 | Patients undergoing a primary total hip or knee arthroplasty                                                                                                                                        | Aminocaproic acid                                                                        | Placebo or no treatment                            |
| Li <sup>214</sup>          | 2018 |                                                     |     |                                            |              |                   |                 |           |                                                                                                                                                                                                     |                                                                                          |                                                    |
|                            |      | Journal of Orthopaedic Surgery and Research         | 1.6 | Orthopedics                                | Not reported | 0/4               | 3 <sup>y</sup>  | 2002-2017 | Patients treated with spine surgery                                                                                                                                                                 | Tranexamic acid                                                                          | Control (not specified)                            |
| Luo <sup>215</sup>         | 2018 |                                                     |     |                                            |              |                   |                 |           |                                                                                                                                                                                                     |                                                                                          |                                                    |
|                            |      | Journal of Orthopaedic Surgery and Research         | 1.6 | Orthopedics                                | No funding   | 0/4               | 4               | 1991-2015 | Patients who underwent hip surgery<br>Patients with a primary diagnosis of major depressive disorder (MDD)                                                                                          | Naproxen<br>Vortioxetine, levomilnacipran, vilazodone                                    | Placebo                                            |
| Ma <sup>216</sup>          | 2018 |                                                     |     |                                            |              |                   |                 |           |                                                                                                                                                                                                     |                                                                                          |                                                    |
|                            |      | Journal of Psychiatric Research                     | 4.0 | Psychiatry                                 | Non-industry | 0/8               | 22              | 2009-2015 |                                                                                                                                                                                                     |                                                                                          | Placebo                                            |
| He <sup>217</sup>          | 2018 |                                                     |     |                                            |              |                   |                 |           |                                                                                                                                                                                                     |                                                                                          |                                                    |
|                            |      | Journal of Stroke & Cerebrovascular Diseases        | 1.6 | Neurosciences; Peripheral Vascular Disease | Non-industry | 4/8               | 6               | 2003-2013 | Asian patients with non-valvular atrial fibrillation (AF)                                                                                                                                           | Warfarin, direct oral anticoagulants (DOACs) - 5 types                                   | Network meta-analysis                              |
| Wang <sup>218</sup>        | 2018 |                                                     |     |                                            |              |                   |                 |           |                                                                                                                                                                                                     |                                                                                          |                                                    |
|                            |      | Journal of the American Academy of Dermatology      | 6.9 | Dermatology                                | No funding   | 0/6               | 15              | 2000-2016 | People with scabies                                                                                                                                                                                 | Permethrin<br>Proprotein convertase subtilisin/kexin type 9 (PCSK9) inhibitors - 2 types | Ivermectin                                         |
| Dhana <sup>219</sup>       | 2018 |                                                     |     |                                            |              |                   |                 |           |                                                                                                                                                                                                     |                                                                                          |                                                    |
|                            |      | Journal of the American Heart Association           | 4.5 | Cardiac & Cardiovascular Systems           | Not reported | 3/12 <sup>z</sup> | 35              | 2012-2017 | Adults with hypercholesterolemia                                                                                                                                                                    |                                                                                          | Placebo, ezetimibe, standard therapy               |
| Karatasakis <sup>220</sup> | 2017 |                                                     |     |                                            |              |                   |                 |           |                                                                                                                                                                                                     |                                                                                          |                                                    |

|    |                          |      |                                                        |      |                                                                                                                             |                  |                    |                  |                          |                                                                    |                                                              |                                                                  |
|----|--------------------------|------|--------------------------------------------------------|------|-----------------------------------------------------------------------------------------------------------------------------|------------------|--------------------|------------------|--------------------------|--------------------------------------------------------------------|--------------------------------------------------------------|------------------------------------------------------------------|
| 1  |                          |      |                                                        |      |                                                                                                                             |                  |                    |                  |                          |                                                                    |                                                              |                                                                  |
| 2  |                          |      |                                                        |      |                                                                                                                             |                  |                    |                  |                          |                                                                    |                                                              |                                                                  |
| 3  |                          |      | Journal of the                                         |      |                                                                                                                             |                  |                    |                  |                          |                                                                    |                                                              |                                                                  |
| 4  |                          |      | European                                               |      |                                                                                                                             |                  |                    |                  |                          |                                                                    |                                                              |                                                                  |
| 5  |                          |      | Academy of                                             |      |                                                                                                                             |                  |                    |                  |                          | Adult patients ( $\geq 18$ )                                       |                                                              |                                                                  |
| 6  |                          |      | Dermatology and                                        |      |                                                                                                                             |                  |                    |                  |                          | with moderate-to-severe plaque                                     |                                                              |                                                                  |
| 7  | Kuo <sup>221</sup>       | 2018 | Venereology                                            | 4.3  | Dermatology                                                                                                                 | Non-<br>industry | 2/4                | 4                | 2012-2016                | psoriasis                                                          | Tofacitinib                                                  | Placebo                                                          |
| 8  |                          |      | Journal of                                             |      |                                                                                                                             |                  |                    |                  |                          |                                                                    |                                                              |                                                                  |
| 9  |                          |      | Traditional                                            |      |                                                                                                                             |                  |                    |                  |                          |                                                                    |                                                              |                                                                  |
| 10 | Liu <sup>222</sup>       | 2016 | Chinese                                                | 0.9  | Integrative &<br>Complementary<br>Medicine                                                                                  | Non-<br>industry | Not<br>reported/6  | 16               | 2005-2015                | Patients with                                                      | Methotrexate                                                 | Sinomenine                                                       |
| 11 |                          |      | Medicine                                               |      |                                                                                                                             |                  |                    |                  |                          |                                                                    |                                                              |                                                                  |
| 12 |                          |      |                                                        |      | Biochemistry &<br>Molecular Biology;<br>Biotechnology &<br>Applied<br>Microbiology;<br>Medicine, Research<br>& Experimental |                  |                    |                  |                          |                                                                    |                                                              |                                                                  |
| 13 |                          |      | Journal of                                             |      |                                                                                                                             |                  |                    |                  |                          | Adult patients                                                     |                                                              |                                                                  |
| 14 |                          |      | Zhejiang                                               |      |                                                                                                                             |                  |                    |                  |                          | undergoing cardiac                                                 |                                                              |                                                                  |
| 15 | Zheng <sup>223</sup>     | 2017 | University-<br>SCIENCE B                               | 1.8  |                                                                                                                             | Not<br>reported  | 0/7                | 8                | 1990-2014                | aortic cross-clamp                                                 | Amiodarone, lidocaine                                        | Placebo                                                          |
| 16 |                          |      |                                                        |      |                                                                                                                             |                  |                    |                  |                          | Patients with                                                      |                                                              |                                                                  |
| 17 |                          |      |                                                        |      |                                                                                                                             |                  |                    |                  |                          | isoniazid-resistant,<br>rifampicin-<br>susceptible<br>tuberculosis |                                                              | Usual care (REZ =<br>rifampicin,<br>ethambutol,<br>pyrazinamide) |
| 18 | Fregonese <sup>224</sup> | 2018 | Lancet<br>Respiratory<br>Medicine                      | 21.5 | Critical Care<br>Medicine;<br>Respiratory System                                                                            | Non-<br>industry | 0/57               | 2                | 2010-2014                |                                                                    | Fluoroquinolone,<br>streptomycin                             |                                                                  |
| 19 |                          |      |                                                        |      |                                                                                                                             |                  |                    |                  |                          |                                                                    |                                                              |                                                                  |
| 20 |                          |      | Neurological                                           |      |                                                                                                                             |                  |                    |                  |                          | Patients during early                                              |                                                              |                                                                  |
| 21 | Bornstein <sup>225</sup> | 2018 | Sciences                                               | 2.3  | Clinical Neurology;<br>Neurosciences                                                                                        | Not<br>reported  | Not<br>reported/10 | 9                | 2010-<br>Unpublishe<br>d | post-stroke period                                                 | Cerebrolysin                                                 | Placebo                                                          |
| 22 |                          |      |                                                        |      |                                                                                                                             |                  |                    |                  |                          | Patients arranged for                                              | Bevacizumab,<br>bevacizumab +<br>antimetabolite - 2<br>types | Placebo,<br>antimetabolite - 2<br>types                          |
| 23 | Chen <sup>226</sup>      | 2018 | Ophthalmic<br>Research                                 | 1.8  | Ophthalmology                                                                                                               |                  | 0/4                | 3                | 2013-2015                | primary<br>trabeculectomy                                          |                                                              |                                                                  |
| 24 |                          |      |                                                        |      |                                                                                                                             |                  |                    |                  |                          | Patients undergoing                                                |                                                              |                                                                  |
| 25 | Han <sup>227</sup>       | 2017 | Pain Physician                                         | 2.6  | Anesthesiology;<br>Clinical Neurology                                                                                       | No<br>funding    | 0/4                | 10               | 2004-2016                | spinal surgery                                                     | Gabapentin                                                   | Placebo                                                          |
| 26 |                          |      |                                                        |      |                                                                                                                             |                  |                    |                  |                          | Adult patients                                                     |                                                              |                                                                  |
| 27 | Peng <sup>228</sup>      | 2017 | Pain Physician                                         | 2.6  | Anesthesiology;<br>Clinical Neurology                                                                                       | No<br>funding    | 0/5                | 18               | 2004-2016                | undergoing surgical<br>procedures                                  | Dexmedetomidine +<br>opioids                                 | Opioids                                                          |
| 28 |                          |      |                                                        |      |                                                                                                                             |                  |                    |                  |                          |                                                                    |                                                              |                                                                  |
| 29 |                          |      |                                                        |      | Chemistry,<br>Medicinal;<br>Chemistry,<br>Multidisciplinary;<br>Pharmacology &<br>Pharmacy                                  |                  |                    |                  |                          |                                                                    |                                                              |                                                                  |
| 30 |                          |      |                                                        |      |                                                                                                                             |                  |                    |                  |                          |                                                                    |                                                              |                                                                  |
| 31 |                          |      |                                                        |      |                                                                                                                             |                  |                    |                  |                          | Patients with                                                      |                                                              | Usual care<br>(chemotherapy), usual<br>care + placebo            |
| 32 | Feng <sup>229</sup>      | 2016 | Pharmazie                                              | 1.0  |                                                                                                                             | Not<br>reported  | 0/7                | 2 <sup>aa</sup>  | 2011-2012                | tuberculosis                                                       | V-5 immunitor                                                |                                                                  |
| 33 |                          |      |                                                        |      |                                                                                                                             |                  |                    |                  |                          |                                                                    |                                                              |                                                                  |
| 34 |                          |      |                                                        |      |                                                                                                                             |                  |                    |                  |                          |                                                                    |                                                              |                                                                  |
| 35 |                          |      |                                                        |      |                                                                                                                             |                  |                    |                  |                          |                                                                    |                                                              |                                                                  |
| 36 |                          |      |                                                        |      |                                                                                                                             |                  |                    |                  |                          | Patients with non-<br>cystic fibrosis<br>bronchiectasis            |                                                              | Placebo, symptomatic<br>treatment only                           |
| 37 | Xu <sup>230</sup>        | 2016 | Pharmazie<br>PLOS<br>Neglected<br>Tropical<br>Diseases | 1.0  |                                                                                                                             | Not<br>reported  | Not<br>reported/8  | 12               | 1999-2014                |                                                                    | Antibiotics - 7 types                                        |                                                                  |
| 38 |                          |      |                                                        |      |                                                                                                                             |                  |                    |                  |                          |                                                                    |                                                              |                                                                  |
| 39 |                          |      |                                                        |      |                                                                                                                             |                  |                    |                  |                          | Patients infected<br>with soil transmitted<br>helminths            |                                                              | Albendazole,<br>ivermectin                                       |
| 40 | Palmeirim <sup>231</sup> | 2018 |                                                        | 4.4  | Parasitology;<br>Tropical Medicine                                                                                          | Non-<br>industry | 0/9                | 14 <sup>bb</sup> | 1997-2015                |                                                                    | Albendazole + ivermectin                                     |                                                                  |
| 41 |                          |      |                                                        |      |                                                                                                                             |                  |                    |                  |                          |                                                                    |                                                              |                                                                  |
| 42 |                          |      |                                                        |      |                                                                                                                             |                  |                    |                  |                          |                                                                    |                                                              |                                                                  |
| 43 |                          |      |                                                        |      |                                                                                                                             |                  |                    |                  |                          |                                                                    |                                                              |                                                                  |
| 44 |                          |      |                                                        |      |                                                                                                                             |                  |                    |                  |                          |                                                                    |                                                              |                                                                  |
| 45 |                          |      |                                                        |      |                                                                                                                             |                  |                    |                  |                          |                                                                    |                                                              |                                                                  |
| 46 |                          |      |                                                        |      |                                                                                                                             |                  |                    |                  |                          |                                                                    |                                                              |                                                                  |
| 47 |                          |      |                                                        |      |                                                                                                                             |                  |                    |                  |                          |                                                                    |                                                              |                                                                  |

1  
2  
3  
4  
5  
6  
7  
8  
9  
10  
11  
12  
13  
14  
15  
16  
17  
18  
19  
20  
21  
22  
23  
24  
25  
26  
27  
28  
29  
30  
31  
32  
33  
34  
35  
36  
37  
38  
39  
40  
41  
42  
43  
44  
45  
46  
47

|                            |      |                                                                 |      |                                                 |              |      |    |           |                                                                                                                                                                                                       |                                                                                                                                                                            |                                                                   |
|----------------------------|------|-----------------------------------------------------------------|------|-------------------------------------------------|--------------|------|----|-----------|-------------------------------------------------------------------------------------------------------------------------------------------------------------------------------------------------------|----------------------------------------------------------------------------------------------------------------------------------------------------------------------------|-------------------------------------------------------------------|
|                            |      |                                                                 |      |                                                 |              |      |    |           | Adults with persistent depressive disorder (DSM-5), chronic major depression, recurrent major depression with incomplete interepisode recovery or dysthymia (DSM-IV), or any corresponding conditions | Antidepressants - 6 types, cognitive-behavioral analysis system of psychotherapy, combination of antidepressants and cognitive-behavioral analysis system of psychotherapy | Network meta-analysis                                             |
| Furukawa <sup>232</sup>    | 2018 | Psychotherapy and Psychosomatics                                | 13.1 | Psychiatry; Psychology                          | Non-industry | 2/11 | 3  | 2000-2015 | Adult patients with chronic kidney disease                                                                                                                                                            | Uric acid-lowering therapy - 2 types                                                                                                                                       | Placebo, usual therapy, no treatment                              |
| Liu <sup>233</sup>         | 2018 | Renal Failure                                                   | 1.4  | Urology & Nephrology                            | Not reported | 0/6  | 12 | 2006-2015 | Adults with a history of chronic obstructive pulmonary disease (COPD)                                                                                                                                 | Tiotropium + olodaterol                                                                                                                                                    | Tiotropium or olodaterol as monotherapy, salmeterol + fluticasone |
| Miravittles <sup>234</sup> | 2017 | Respiratory Research                                            | 3.8  | Respiratory System                              | Industry     | 3/4  | 10 | 2014-2016 | Patients with intermittent or mild persistent asthma                                                                                                                                                  | Corticosteroids, fast-onset-acting $\beta$ 2-agonists                                                                                                                      | Corticosteroid + fast-onset-acting $\beta$ 2-agonist              |
| Wang <sup>235</sup>        | 2017 | Respiratory Research                                            | 3.8  | Respiratory System                              | Non-industry | 1/7  | 6  | 2006-2016 | Adults (18 years and over) with moderate to severe psoriatic arthritis (PsA)                                                                                                                          | Tumor necrosis factor (antiTNF)- $\alpha$ inhibitors - 4 types                                                                                                             | Placebo - Network meta-analysis                                   |
| Kawalec <sup>236</sup>     | 2018 | Rheumatology International                                      | 2.0  | Rheumatology                                    | No funding   | 0/4  | 8  | 2011-2016 | Adult patients (18 years and over) treated for the secondary prevention of cardiovascular, peripheral vascular, and cerebrovascular disease                                                           | Proton pump inhibitors (PPI) + thienopyridines                                                                                                                             | Thienopyridines - 2 types                                         |
| Malhotra <sup>237</sup>    | 2018 | Stroke Surgical Laparoscopy Endoscopy & Percutaneous Techniques | 6.2  | Clinical Neurology; Peripheral Vascular Disease | Not reported | 0/6  | 12 | 2009-2016 | Adults (18 and over) undergoing gastrointestinal endoscopy                                                                                                                                            | Midazolam                                                                                                                                                                  | Propofol                                                          |
| Zhang <sup>238</sup>       | 2018 | Thrombosis Research                                             | 2.8  | Hematology; Peripheral Vascular Disease         | No funding   | 3/7  | 6  | 2009-2014 | Asian and non-Asian adults (18 years and older) with acute venous thromboembolism                                                                                                                     | Direct oral anticoagulants (DOACs) - 4 types                                                                                                                               | Vitamin K antagonists (VKAs), heparin                             |
| Yamashita <sup>239</sup>   | 2018 | Vaccine                                                         | 3.3  | Immunology; Medicine, Research & Experimental   | No funding   | 1/6  | 13 | 1999-2014 | HIV-positive people                                                                                                                                                                                   | Influenza vaccine, Placebo                                                                                                                                                 | Network meta-analysis                                             |
| Zhang <sup>240</sup>       | 2018 |                                                                 |      |                                                 |              |      |    |           |                                                                                                                                                                                                       |                                                                                                                                                                            |                                                                   |



**Multidisciplinary sciences (n = 10)**

| Author                     | Year | Journal                 | Score | Field                             | Funding      | Studies        | Patients         | Interventions | Outcomes                                                                                                                                                                                                                                                                                                                                                                                                                                                                     |                                                                                                                                                                                                                                        |
|----------------------------|------|-------------------------|-------|-----------------------------------|--------------|----------------|------------------|---------------|------------------------------------------------------------------------------------------------------------------------------------------------------------------------------------------------------------------------------------------------------------------------------------------------------------------------------------------------------------------------------------------------------------------------------------------------------------------------------|----------------------------------------------------------------------------------------------------------------------------------------------------------------------------------------------------------------------------------------|
| Chen <sup>241</sup>        | 2018 | Medical Science Monitor | 1.9   | Medicine, Research & Experimental | Non-industry | 0/5            | 20 <sup>cc</sup> | 2000-2016     | Patients with essential hypertension<br>Adult patients (over 18 years old) that underwent the extraction of any tooth<br>Adults with osteoarthritis or rheumatoid arthritis of the knee or hip<br>Pediatric surgical patients<br>Adults (18 years and over) diagnosed with generalized anxiety disorder (GAD)<br>Patients with hypertension and chronic kidney disease stage 3 to 5 and dialysis<br>Adults (19 years and over) undergoing cardiac surgery<br>Cancer patients | Anti-hypertensive drugs - 8 types<br>Acupuncture<br>Chlorhexidine<br>Etoricoxib<br>Magnesium<br>Duloxetine<br>Calcium channel blockers<br>Dexmedetomidine<br>Erythropoiesis-stimulating agents<br>Digoxin<br>mTOR-inhibitors - 2 types |
| Arteagoitia <sup>242</sup> | 2018 | PLOS ONE                | 2.8   | Multidisciplinary Sciences        | No funding   | 0/3            | 8                | 1989-2015     | Placebo, standard treatment<br>Placebo, other non-steroidal anti-inflammatory drugs (NSAIDs) - 2 included                                                                                                                                                                                                                                                                                                                                                                    |                                                                                                                                                                                                                                        |
| Feng <sup>243</sup>        | 2018 | PLOS ONE                | 2.8   | Multidisciplinary Sciences        | No funding   | 0/4            | 9                | 2002-2009     |                                                                                                                                                                                                                                                                                                                                                                                                                                                                              |                                                                                                                                                                                                                                        |
| Kawakami <sup>244</sup>    | 2018 | PLOS ONE                | 2.8   | Multidisciplinary Sciences        | Non-industry | 0/5            | 6                | 2007-2017     | Placebo, no treatment                                                                                                                                                                                                                                                                                                                                                                                                                                                        |                                                                                                                                                                                                                                        |
| Li <sup>245</sup>          | 2018 | PLOS ONE                | 2.8   | Multidisciplinary Sciences        | Non-industry | 0/7            | 8                | 2007-2014     | Placebo                                                                                                                                                                                                                                                                                                                                                                                                                                                                      |                                                                                                                                                                                                                                        |
| Lin <sup>246</sup>         | 2017 | PLOS ONE                | 2.8   | Multidisciplinary Sciences        | Non-industry | 0/6            | 21               | 1992-2012     | Angiotensin-converting enzyme inhibitors, angiotensin receptor blockers                                                                                                                                                                                                                                                                                                                                                                                                      |                                                                                                                                                                                                                                        |
| Ling <sup>247</sup>        | 2018 | PLOS ONE                | 2.8   | Multidisciplinary Sciences        | Non-industry | Not reported/6 | 9                | 2003-2017     | Propofol, morphine, placebo                                                                                                                                                                                                                                                                                                                                                                                                                                                  |                                                                                                                                                                                                                                        |
| Rohner <sup>248</sup>      | 2017 | PLOS ONE                | 2.8   | Multidisciplinary Sciences        | Non-industry | 2/7            | 94               | 1993-2014     | Usual care<br>Placebo, no intervention, beta blockers, calcium antagonists, amiodarone                                                                                                                                                                                                                                                                                                                                                                                       |                                                                                                                                                                                                                                        |
| Sethi <sup>249</sup>       | 2018 | PLOS ONE                | 2.8   | Multidisciplinary Sciences        | No funding   | 0/6            | 28               | 1986-2017     |                                                                                                                                                                                                                                                                                                                                                                                                                                                                              |                                                                                                                                                                                                                                        |
| Wolf <sup>250</sup>        | 2018 | PLOS ONE                | 2.8   | Multidisciplinary Sciences        | Industry     | 1/9            | 13               | 2002-2016     | Calcineurin-inhibitors                                                                                                                                                                                                                                                                                                                                                                                                                                                       |                                                                                                                                                                                                                                        |

<sup>a</sup>Only 3 studies reported that authors were employed by industry and therefore we included them as ties for the purposes of this table; <sup>b</sup>11/12 included RCTs had a drug arm; <sup>c</sup>33/38 included RCTs had a drug arm; <sup>d</sup>4/14 included RCTs had a drug arm; <sup>e</sup>One author reported pharmaceutical company employment; <sup>f</sup>9/11 included RCTs had a drug arm; <sup>g</sup>71/120 included studies were RCTs; <sup>h</sup>24/25 included studies were RCTs; <sup>i</sup>Meta-analysis funding sources reported as 'None, Other' we coded as no study funding; <sup>j</sup>10/27 included RCTs had a drug arm; <sup>k</sup>Flow chart indicates that 0 RCTs were included in the quantitative synthesis, but 2 RCTs were quantitatively synthesized and 13 were included; <sup>l</sup>Declarations of interest were provided for only 3 out of 5 meta-analysis authors; <sup>m</sup>24/31 included RCTs had a drug arm; <sup>n</sup>103/106 included RCTs had a drug arm; <sup>o</sup>3/5 included RCTs had a drug arm; <sup>p</sup>34/60 included RCTs had a drug arm; <sup>q</sup>110/123 included RCTs had an eligible drug arm; <sup>r</sup>Salary was reported under 'funding' but they did not specify whether there was any funding for the study itself; <sup>s</sup>ICMJE forms only provided for 5/9 authors; <sup>t</sup>3/4 included studies were RCTs; <sup>u</sup>4/11 included studies were RCTs; <sup>v</sup>Four authors reported financial ties with a pharmaceutical company and employment by Symmetron, a company that provides health economic research services to pharmaceutical companies, and two authors reported employment by a pharmaceutical company; <sup>w</sup>10/12 included studies were RCTs; <sup>x</sup>3/7 included studies were RCTs; <sup>y</sup>3/4 included studies were RCTs; <sup>z</sup>Of the 3 authors that reported financial ties, one also reported industry employment; <sup>aa</sup>2/4 included studies were RCTs; <sup>bb</sup>14/30 included studies were RCTs; <sup>cc</sup>20/30 included studies were RCTs with a drug arm

eTable2. – Detailed reporting of study funding sources (F), author-industry financial ties (T), and author-industry employment (E) form included RCTs

| First Author                      | Year | Journal                                 | Funding Sources of Included Trials Reported in Meta-analysis? | Author-Industry Financial Ties of Included Trials Reported in Meta-analysis? | Author-Industry Employment of Included Trials Reported in Meta-analysis? | Location Reported |                              |                                    |                                                                                           |   | Abstract | Lay summary | Online appendix |
|-----------------------------------|------|-----------------------------------------|---------------------------------------------------------------|------------------------------------------------------------------------------|--------------------------------------------------------------------------|-------------------|------------------------------|------------------------------------|-------------------------------------------------------------------------------------------|---|----------|-------------|-----------------|
|                                   |      |                                         |                                                               |                                                                              |                                                                          | Risk of Bias Text | Risk of Bias Figure or Table | Main Text, Other than Risk of Bias | Other in Main Document (Characteristics of Included Studies Table, other table, footnote) |   |          |             |                 |
| <b>Cochrane Reviews (n = 107)</b> |      |                                         |                                                               |                                                                              |                                                                          |                   |                              |                                    |                                                                                           |   |          |             |                 |
| Abdel-Rahman <sup>1</sup>         | 2018 | Cochrane Database of Systematic Reviews | Full                                                          | No                                                                           | No                                                                       | F                 | F                            |                                    | F                                                                                         |   | F        | F           |                 |
| Adams <sup>2</sup>                | 2018 | Cochrane Database of Systematic Reviews | Full                                                          | No                                                                           | No                                                                       | F                 |                              | F                                  | F                                                                                         |   |          |             |                 |
| Agabio <sup>3</sup>               | 2018 | Cochrane Database of Systematic Reviews | Full                                                          | Partial                                                                      | No                                                                       |                   |                              | F, T                               | F, T                                                                                      |   |          | F           |                 |
| Al-Shahi Salman <sup>4</sup>      | 2018 | Cochrane Database of Systematic Reviews | Partial                                                       | No                                                                           | No                                                                       |                   |                              | F                                  | F                                                                                         |   |          |             |                 |
| Alabed <sup>5</sup>               | 2018 | Cochrane Database of Systematic Reviews | Partial                                                       | No                                                                           | Partial                                                                  |                   |                              |                                    | F, E                                                                                      |   |          |             |                 |
| Allegretti <sup>6</sup>           | 2017 | Cochrane Database of Systematic Reviews | Full                                                          | No                                                                           | No                                                                       | F                 | F                            |                                    |                                                                                           |   | F        | F           |                 |
| Arechabala <sup>7</sup>           | 2018 | Cochrane Database of Systematic Reviews | Full                                                          | Partial                                                                      | Partial                                                                  | F                 | F, E                         | F, T                               | F, T, E                                                                                   |   |          | F           |                 |
| Baandrup <sup>8</sup>             | 2018 | Cochrane Database of Systematic Reviews | Full                                                          | Full                                                                         | Partial                                                                  | F                 | F                            | F                                  | F, T, E                                                                                   |   |          | F           |                 |
| Bala <sup>9</sup>                 | 2018 | Cochrane Database of Systematic Reviews | Full                                                          | No                                                                           | No                                                                       | F                 |                              |                                    | F                                                                                         |   |          |             |                 |
| Barbato <sup>10</sup>             | 2018 | Cochrane Database of Systematic Reviews | No                                                            | No                                                                           | No                                                                       |                   |                              |                                    |                                                                                           |   |          |             |                 |
| Bergman <sup>11</sup>             | 2018 | Cochrane Database of Systematic Reviews | Full                                                          | Partial                                                                      | No                                                                       |                   |                              |                                    | F, T                                                                                      |   |          |             |                 |
| Bighelli <sup>12</sup>            | 2018 | Cochrane Database of Systematic Reviews | Full                                                          | Full                                                                         | Partial                                                                  | F                 | F, T, E                      | F                                  | F, T, E                                                                                   | F | F        | F           |                 |
| Birks <sup>13</sup>               | 2018 | Cochrane Database of Systematic Reviews | Full                                                          | Partial                                                                      | No                                                                       |                   |                              | F                                  | F, T                                                                                      | F |          |             |                 |
| Boyapati <sup>14</sup>            | 2018 | Cochrane Database of Systematic Reviews | No                                                            | No                                                                           | No                                                                       |                   |                              |                                    |                                                                                           |   |          |             |                 |
| Brown <sup>15</sup>               | 2018 | Cochrane Database of Systematic Reviews | Partial                                                       | Partial                                                                      | No                                                                       | F                 | F                            | F                                  | F, T                                                                                      | F | F        | F           |                 |
| Bruins Slot <sup>16</sup>         | 2018 | Cochrane Database of Systematic Reviews | Full                                                          | No                                                                           | No                                                                       |                   |                              |                                    | F                                                                                         |   |          |             |                 |
| Bryan <sup>17</sup>               | 2017 | Cochrane Database of Systematic Reviews | Partial                                                       | No                                                                           | No                                                                       |                   |                              |                                    | F                                                                                         |   |          |             |                 |

|    |                              |      |                      |                      |                      |         |      |      |   |         |
|----|------------------------------|------|----------------------|----------------------|----------------------|---------|------|------|---|---------|
| 1  |                              |      |                      |                      |                      |         |      |      |   |         |
| 2  |                              |      |                      |                      |                      |         |      |      |   |         |
| 3  |                              |      | Cochrane Database of |                      |                      |         |      |      |   |         |
| 4  | Bryant-Smith <sup>18</sup>   | 2018 | Systematic Reviews   | Full                 | No                   | No      |      |      |   | F       |
| 5  | Burry <sup>19</sup>          | 2018 | Cochrane Database of | Full                 | No                   | No      | F    | F    |   | F       |
| 6  |                              |      | Systematic Reviews   |                      |                      |         |      |      |   |         |
| 7  | Campschroer <sup>20</sup>    | 2018 | Cochrane Database of | Full                 | Full                 | No      |      |      |   | F, T    |
| 8  |                              |      | Systematic Reviews   |                      |                      |         |      |      |   |         |
| 9  | Candy <sup>21</sup>          | 2018 | Cochrane Database of | Full                 | No                   | No      |      | F    |   | F       |
| 10 |                              |      | Systematic Reviews   |                      |                      |         |      |      |   |         |
| 11 | Chiew <sup>22</sup>          | 2018 | Cochrane Database of | No                   | No                   | No      |      |      |   |         |
| 12 |                              |      | Systematic Reviews   |                      |                      |         |      |      |   |         |
| 13 | Das <sup>23</sup>            | 2018 | Cochrane Database of | Full                 | No                   | No      |      | F    |   | F       |
| 14 |                              |      | Systematic Reviews   |                      |                      |         |      |      |   |         |
| 15 | Demicheli <sup>24</sup>      | 2018 | Cochrane Database of | Full <sup>a</sup>    | Partial              | Partial |      |      |   | F, T, E |
| 16 |                              |      | Systematic Reviews   |                      |                      |         |      |      |   |         |
| 17 | Demicheli <sup>25</sup>      | 2018 | Cochrane Database of | No                   | No                   | No      |      |      |   |         |
| 18 |                              |      | Systematic Reviews   |                      |                      |         |      |      |   |         |
| 19 | Di Nisio <sup>26</sup>       | 2018 | Cochrane Database of | Partial              | Partial              | No      |      |      |   | F, T    |
| 20 |                              |      | Systematic Reviews   |                      |                      |         |      |      |   |         |
| 21 | El-Sayeh <sup>27</sup>       | 2018 | Cochrane Database of | Full                 | No                   | No      | F    |      |   | F       |
| 22 |                              |      | Systematic Reviews   |                      |                      |         |      |      |   |         |
| 23 | Engelen <sup>28</sup>        | 2018 | Cochrane Database of | No                   | No                   | No      |      |      |   |         |
| 24 |                              |      | Systematic Reviews   |                      |                      |         |      |      |   |         |
| 25 | Eshun-Wilson <sup>29</sup>   | 2018 | Cochrane Database of | Full                 | Full                 | No      |      |      |   | F, T    |
| 26 |                              |      | Systematic Reviews   |                      |                      |         |      |      |   |         |
| 27 | Essali <sup>30</sup>         | 2018 | Cochrane Database of | Full                 | No                   | No      |      |      |   | F       |
| 28 |                              |      | Systematic Reviews   |                      |                      |         |      |      |   |         |
| 29 | Everitt <sup>31</sup>        | 2018 | Cochrane Database of | Partial              | Partial              | No      | F, T | F, T | F | F, T    |
| 30 |                              |      | Systematic Reviews   |                      |                      |         |      |      |   |         |
| 31 | Fanshawe <sup>32</sup>       | 2017 | Cochrane Database of | No                   | No                   | No      |      |      |   |         |
| 32 |                              |      | Systematic Reviews   |                      |                      |         |      |      |   |         |
| 33 | Franik <sup>33</sup>         | 2018 | Cochrane Database of | Full                 | Partial              | No      |      |      |   | F, T    |
| 34 |                              |      | Systematic Reviews   |                      |                      |         |      |      |   |         |
| 35 | González <sup>34</sup>       | 2018 | Cochrane Database of | Full                 | No                   | No      |      |      |   | F       |
| 36 |                              |      | Systematic Reviews   |                      |                      |         |      |      |   |         |
| 37 | Grabosch <sup>35</sup>       | 2018 | Cochrane Database of | No                   | No                   | No      |      |      |   |         |
| 38 |                              |      | Systematic Reviews   |                      |                      |         |      |      |   |         |
| 39 | Graves <sup>36</sup>         | 2018 | Cochrane Database of | Partial <sup>b</sup> | No                   | No      |      |      |   | F       |
| 40 |                              |      | Systematic Reviews   |                      |                      |         |      |      |   |         |
| 41 | Haas <sup>37</sup>           | 2018 | Cochrane Database of | Full                 | Full                 | No      |      | F, T |   | F, T    |
| 42 |                              |      | Systematic Reviews   |                      |                      |         |      |      |   |         |
| 43 | Hakoum <sup>38</sup>         | 2018 | Cochrane Database of | Full                 | Full                 | No      |      |      |   | F, T    |
| 44 |                              |      | Systematic Reviews   |                      |                      |         |      |      |   |         |
| 45 | Heras-Mosteiro <sup>39</sup> | 2017 | Cochrane Database of | Partial <sup>c</sup> | Partial <sup>d</sup> | Partial |      |      |   | F, T, E |
| 46 |                              |      | Systematic Reviews   |                      |                      |         |      |      |   |         |
| 47 | Janmaat <sup>40</sup>        | 2017 | Cochrane Database of | No                   | No                   | No      |      |      |   |         |
| 48 |                              |      | Systematic Reviews   |                      |                      |         |      |      |   |         |
| 49 | Jefferson <sup>41</sup>      | 2018 | Cochrane Database of | Full                 | No                   | No      |      |      |   | F       |
| 50 |                              |      | Systematic Reviews   |                      |                      |         |      |      |   |         |
| 51 | Jung <sup>42</sup>           | 2017 | Cochrane Database of | Full                 | Full                 | Partial |      | F, T |   | F, T, E |
| 52 |                              |      | Systematic Reviews   |                      |                      |         |      |      |   |         |

1  
2  
3  
4  
5  
6  
7  
8  
9  
10  
11  
12  
13  
14  
15  
16  
17  
18  
19  
20  
21  
22  
23  
24  
25  
26  
27  
28  
29  
30  
31  
32  
33  
34  
35  
36  
37  
38  
39  
40  
41  
42  
43  
44  
45  
46  
47

|                           |      |                                         |                      |         |                      |      |      |      |         |   |
|---------------------------|------|-----------------------------------------|----------------------|---------|----------------------|------|------|------|---------|---|
| Kaempfen <sup>43</sup>    | 2018 | Cochrane Database of Systematic Reviews | No                   | No      | No                   |      |      |      |         |   |
| Kahale <sup>44</sup>      | 2017 | Cochrane Database of Systematic Reviews | Full                 | Full    | Partial <sup>e</sup> |      |      |      | F, T, E |   |
| Kahale <sup>45</sup>      | 2018 | Cochrane Database of Systematic Reviews | Full                 | Partial | No                   |      |      |      | F, T    |   |
| Kahale <sup>46</sup>      | 2018 | Cochrane Database of Systematic Reviews | Full                 | Partial | No                   |      |      |      | F, T    |   |
| Kapur <sup>47</sup>       | 2018 | Cochrane Database of Systematic Reviews | Full                 | No      | No                   |      |      |      | F       |   |
| Kelly <sup>48</sup>       | 2018 | Cochrane Database of Systematic Reviews | Partial <sup>f</sup> | Partial | No                   |      | F    |      | F, T    |   |
| Knightly <sup>49</sup>    | 2017 | Cochrane Database of Systematic Reviews | Full                 | No      | No                   |      |      |      | F       |   |
| Kopsaftis <sup>50</sup>   | 2018 | Cochrane Database of Systematic Reviews | No                   | No      | No                   |      |      |      |         |   |
| Lawrie <sup>51</sup>      | 2018 | Cochrane Database of Systematic Reviews | Full                 | Partial | Partial              |      |      |      | F, T, E |   |
| Leathersich <sup>52</sup> | 2018 | Cochrane Database of Systematic Reviews | Full                 | Full    | No                   | F, T | F, T | F, T | F, T    |   |
| Lethaby <sup>53</sup>     | 2017 | Cochrane Database of Systematic Reviews | Full                 | No      | No                   |      |      | F    | F       | F |
| López-Briz <sup>54</sup>  | 2018 | Cochrane Database of Systematic Reviews | Full                 | No      | No                   |      |      |      | F       |   |
| Marchant <sup>55</sup>    | 2018 | Cochrane Database of Systematic Reviews | Partial              | No      | No                   |      |      |      | F       |   |
| Matar <sup>56</sup>       | 2018 | Cochrane Database of Systematic Reviews | Full                 | No      | No                   |      | F    |      |         |   |
| Matar <sup>57</sup>       | 2018 | Cochrane Database of Systematic Reviews | Full                 | Full    | No                   |      |      |      | F, T    |   |
| McNicol <sup>58</sup>     | 2018 | Cochrane Database of Systematic Reviews | Full                 | No      | No                   |      |      |      | F       |   |
| McTague <sup>59</sup>     | 2018 | Cochrane Database of Systematic Reviews | No                   | No      | No                   |      |      |      |         |   |
| Mhaskar <sup>60</sup>     | 2017 | Cochrane Database of Systematic Reviews | Full                 | Full    | Partial              |      |      |      | F, T, E |   |
| Milligan <sup>61</sup>    | 2018 | Cochrane Database of Systematic Reviews | Partial <sup>g</sup> | No      | No                   | F    | F    |      |         |   |
| Monk <sup>62</sup>        | 2017 | Cochrane Database of Systematic Reviews | Full                 | Full    | No                   |      |      | F, T | F, T    |   |
| Montero <sup>63</sup>     | 2018 | Cochrane Database of Systematic Reviews | Partial              | No      | No                   |      | F    |      |         |   |
| Mücke <sup>64</sup>       | 2018 | Cochrane Database of Systematic Reviews | Full                 | Full    | Partial              |      |      | F, T | F, T, E |   |
| Narula <sup>65</sup>      | 2018 | Cochrane Database of Systematic Reviews | No                   | No      | No                   |      |      |      |         |   |
| Nevitt <sup>66</sup>      | 2017 | Cochrane Database of Systematic Reviews | Partial              | No      | No                   |      |      | F    | F       |   |
| Nevitt <sup>67</sup>      | 2018 | Cochrane Database of Systematic Reviews | Full                 | No      | No                   |      |      |      | F       |   |



|    |                                  |      |                      |                      |         |         |      |         |         |      |      |  |
|----|----------------------------------|------|----------------------|----------------------|---------|---------|------|---------|---------|------|------|--|
| 1  |                                  |      |                      |                      |         |         |      |         |         |      |      |  |
| 2  |                                  |      |                      |                      |         |         |      |         |         |      |      |  |
| 3  |                                  |      | Cochrane Database of |                      |         |         |      |         |         |      |      |  |
| 4  | Sturman <sup>93</sup>            | 2017 | Systematic Reviews   | Full                 | Full    | No      | F, T | F, T    | F, T    |      |      |  |
| 5  | Tammenmaa-                       |      | Cochrane Database of |                      |         |         |      |         |         |      |      |  |
| 6  | Aho <sup>94</sup>                | 2018 | Systematic Reviews   | Partial              | No      | No      |      |         |         | F    |      |  |
| 7  | Temmingh <sup>95</sup>           | 2018 | Cochrane Database of |                      |         |         |      |         |         |      |      |  |
| 8  |                                  |      | Systematic Reviews   | Full                 | Partial | Partial | F, T | F, T, E | F, T, E | F, T |      |  |
| 9  | Tenforde <sup>96</sup>           | 2018 | Cochrane Database of |                      |         |         |      |         |         |      |      |  |
| 10 |                                  |      | Systematic Reviews   | Full                 | Full    | No      | F, T | F, T    |         | F, T |      |  |
| 11 | Toews <sup>97</sup>              | 2018 | Cochrane Database of |                      |         |         |      |         | F, E    | F    | F, T |  |
| 12 | Venekamp <sup>98</sup>           | 2018 | Systematic Reviews   | Full                 | Full    | No      |      |         | F       |      | F, T |  |
| 13 | Vermeij <sup>99</sup>            | 2018 | Cochrane Database of |                      |         |         |      |         |         |      |      |  |
| 14 |                                  |      | Systematic Reviews   | No                   | No      | No      |      |         |         |      |      |  |
| 15 | Vietto <sup>100</sup>            | 2018 | Cochrane Database of |                      |         |         |      |         |         | F    | F    |  |
| 16 |                                  |      | Systematic Reviews   | Full                 | No      | No      |      |         |         |      |      |  |
| 17 | Wall <sup>101</sup>              | 2018 | Cochrane Database of |                      |         |         | F, T | F       | F       | F    |      |  |
| 18 | Weibel <sup>102</sup>            | 2018 | Systematic Reviews   | Full                 | No      | No      |      |         | F       | F    |      |  |
| 19 |                                  |      | Cochrane Database of |                      |         |         |      |         |         |      |      |  |
| 20 | Wright <sup>103</sup>            | 2018 | Systematic Reviews   | Partial              | Partial | No      | F    | F, T    |         |      |      |  |
| 21 | Xiao <sup>104</sup>              | 2018 | Cochrane Database of |                      |         |         |      |         |         | F    |      |  |
| 22 |                                  |      | Systematic Reviews   | Full                 | No      | No      |      |         |         |      |      |  |
| 23 | Zhang <sup>105</sup>             | 2017 | Cochrane Database of |                      |         |         | F    | F       | F       | F    | F    |  |
| 24 |                                  |      | Systematic Reviews   | Full                 | No      | No      |      |         |         |      |      |  |
| 25 | Zhou <sup>106</sup>              | 2017 | Cochrane Database of |                      |         |         |      |         | F       | F, T | F    |  |
| 26 |                                  |      | Systematic Reviews   | Partial <sup>l</sup> | No      | No      |      | F       |         |      |      |  |
| 27 | Zonneveld <sup>107</sup>         | 2018 | Systematic Reviews   | Partial <sup>l</sup> | No      | No      |      | F       |         |      |      |  |
| 28 | <b>General Medicine (n = 33)</b> |      |                      |                      |         |         |      |         |         |      |      |  |
| 29 | López-López <sup>108</sup>       | 2017 | BMJ                  | Full                 | No      | No      |      |         | F       |      | F    |  |
| 30 | Wang <sup>109</sup>              | 2018 | BMJ Open             | No                   | No      | No      |      |         |         |      |      |  |
| 31 | Cipriani <sup>110</sup>          | 2018 | Lancet               | Full <sup>k</sup>    | No      | No      |      |         | F       |      | F    |  |
| 32 | Chen <sup>111</sup>              | 2018 | Medicine             | No                   | No      | No      |      |         |         |      |      |  |
| 33 | Ding <sup>112</sup>              | 2018 | Medicine             | No                   | No      | No      |      |         |         |      |      |  |
| 34 | Guo <sup>113</sup>               | 2018 | Medicine             | No                   | No      | No      |      |         |         |      |      |  |
| 35 | Han <sup>114</sup>               | 2018 | Medicine             | No                   | No      | No      |      |         |         |      |      |  |
| 36 | Hu <sup>115</sup>                | 2018 | Medicine             | No                   | No      | No      |      |         |         |      |      |  |
| 37 | Huang <sup>116</sup>             | 2018 | Medicine             | Full                 | Partial | No      | F, T |         |         |      |      |  |
| 38 | Jiang <sup>117</sup>             | 2018 | Medicine             | No                   | No      | No      |      |         |         |      |      |  |
| 39 | Jiang <sup>118</sup>             | 2018 | Medicine             | No                   | No      | No      |      |         |         |      |      |  |
| 40 | Khan <sup>119</sup>              | 2018 | Medicine             | No                   | No      | No      |      |         |         |      |      |  |
| 41 | Liang <sup>120</sup>             | 2017 | Medicine             | No                   | No      | No      |      |         |         |      |      |  |
| 42 | Liu <sup>121</sup>               | 2018 | Medicine             | Partial <sup>l</sup> | No      | No      |      |         | F       |      |      |  |
| 43 | Lor <sup>122</sup>               | 2017 | Medicine             | No                   | No      | No      |      |         |         |      |      |  |
| 44 | Wang <sup>123</sup>              | 2017 | Medicine             | No                   | No      | No      |      |         |         |      |      |  |
| 45 | Wang <sup>124</sup>              | 2018 | Medicine             | No                   | No      | No      |      |         |         |      |      |  |
| 46 | Wang <sup>125</sup>              | 2018 | Medicine             | No                   | No      | No      |      |         |         |      |      |  |
| 47 | Wei <sup>126</sup>               | 2017 | Medicine             | No                   | No      | No      |      |         |         |      |      |  |

|    |                                     |      |                                                                     |                      |    |    |      |   |
|----|-------------------------------------|------|---------------------------------------------------------------------|----------------------|----|----|------|---|
| 1  |                                     |      |                                                                     |                      |    |    |      |   |
| 2  |                                     |      |                                                                     |                      |    |    |      |   |
| 3  | Woo <sup>127</sup>                  | 2018 | Medicine                                                            | No                   | No | No |      |   |
| 4  | Xia <sup>128</sup>                  | 2018 | Medicine                                                            | No                   | No | No |      |   |
| 5  | Yang <sup>129</sup>                 | 2017 | Medicine                                                            | No                   | No | No |      |   |
| 6  | Ye <sup>130</sup>                   | 2017 | Medicine                                                            | No                   | No | No |      |   |
| 7  | Yu <sup>131</sup>                   | 2018 | Medicine                                                            | No                   | No | No |      |   |
| 8  | Yuan <sup>132</sup>                 | 2018 | Medicine                                                            | No                   | No | No |      |   |
| 9  | Zhang <sup>133</sup>                | 2018 | Medicine                                                            | No                   | No | No |      |   |
| 10 | Zhang <sup>134</sup>                | 2018 | Medicine                                                            | No                   | No | No |      |   |
| 11 | Zhao <sup>135</sup>                 | 2018 | Medicine                                                            | No                   | No | No |      |   |
| 12 | Zhao <sup>136</sup>                 | 2018 | Medicine                                                            | No                   | No | No |      |   |
| 13 | Zhou <sup>137</sup>                 | 2018 | Medicine                                                            | No                   | No | No |      |   |
| 14 | Zhu <sup>138</sup>                  | 2018 | Medicine                                                            | No                   | No | No |      |   |
| 15 | Zhou <sup>139</sup>                 | 2018 | Postgraduate Medicine<br>Revista da Associação<br>Médica Brasileira | No                   | No | No |      |   |
| 16 | Zhang <sup>140</sup>                | 2018 | Full                                                                | Full <sup>m</sup>    | No |    | F, T |   |
| 17 | <b>Specialty medicine (n = 100)</b> |      |                                                                     |                      |    |    |      |   |
| 18 | Li <sup>141</sup>                   | 2018 | Acta Ophthalmologica<br>American Heart<br>Journal                   | Full <sup>n</sup>    | No | No | F    | F |
| 19 | Tarantini <sup>142</sup>            | 2018 | American Journal of<br>Cardiovascular Drugs                         | No                   | No | No |      |   |
| 20 | Wang <sup>143</sup>                 | 2018 | Anaesthesia and<br>Intensive Care                                   | No                   | No | No |      |   |
| 21 | Aman <sup>144</sup>                 | 2018 | Autoimmunity<br>Reviews                                             | No                   | No | No |      |   |
| 22 | Li <sup>145</sup>                   | 2018 | Biomed Research<br>International                                    | No                   | No | No |      |   |
| 23 | Wang <sup>146</sup>                 | 2018 | BMC Cancer                                                          | No                   | No | No |      |   |
| 24 | Veetil <sup>147</sup>               | 2017 | BMC Cardiovascular<br>Disorders                                     | Full                 | No | No |      | F |
| 25 | Bredemeier <sup>148</sup>           | 2018 | BMC<br>Gastroenterology                                             | No                   | No | No |      |   |
| 26 | Lyu <sup>149</sup>                  | 2018 | BMC Infectious<br>Diseases                                          | No                   | No | No |      |   |
| 27 | Xing <sup>150</sup>                 | 2017 | BMC Musculoskeletal<br>Disorders                                    | No                   | No | No |      |   |
| 28 | Kuo <sup>151</sup>                  | 2018 | BMC Neurology                                                       | No                   | No | No |      |   |
| 29 | Beez <sup>152</sup>                 | 2017 | BMC Ophthalmology                                                   | No                   | No | No |      |   |
| 30 | Zeng <sup>153</sup>                 | 2017 | BMC Pharmacology &<br>Toxicology                                    | No                   | No | No |      |   |
| 31 | Bundhun <sup>154</sup>              | 2017 | BMC Psychiatry                                                      | No                   | No | No |      |   |
| 32 | Zhang <sup>155</sup>                | 2017 | BMC Pulmonary<br>Medicine                                           | No                   | No | No |      |   |
| 33 | Zhang <sup>156</sup>                | 2017 | BMC Pulmonary<br>Medicine                                           | Full                 | No | No |      |   |
| 34 | Zhang <sup>157</sup>                | 2017 | Breast Cancer                                                       | No                   | No | No |      |   |
| 35 | Ramos-Esquivel <sup>158</sup>       | 2018 | British Journal of<br>Sports Medicine                               | Partial <sup>o</sup> | No | No | F    | F |
| 36 | Zeng <sup>159</sup>                 | 2018 |                                                                     |                      |    |    |      |   |
| 37 |                                     |      |                                                                     |                      |    |    |      |   |
| 38 |                                     |      |                                                                     |                      |    |    |      |   |
| 39 |                                     |      |                                                                     |                      |    |    |      |   |
| 40 |                                     |      |                                                                     |                      |    |    |      |   |
| 41 |                                     |      |                                                                     |                      |    |    |      |   |
| 42 |                                     |      |                                                                     |                      |    |    |      |   |
| 43 |                                     |      |                                                                     |                      |    |    |      |   |
| 44 |                                     |      |                                                                     |                      |    |    |      |   |
| 45 |                                     |      |                                                                     |                      |    |    |      |   |
| 46 |                                     |      |                                                                     |                      |    |    |      |   |
| 47 |                                     |      |                                                                     |                      |    |    |      |   |

|    |                            |      |                        |                      |    |    |   |   |
|----|----------------------------|------|------------------------|----------------------|----|----|---|---|
| 1  |                            |      |                        |                      |    |    |   |   |
| 2  |                            |      |                        |                      |    |    |   |   |
| 3  |                            |      | Cellular Physiology    |                      |    |    |   |   |
| 4  | Shui <sup>160</sup>        | 2018 | and Biochemistry       | No                   | No | No |   |   |
| 5  | Rodrigo <sup>161</sup>     | 2018 | Clinical Microbiology  | Partial              | No | No |   | F |
| 6  |                            |      | and Infection          |                      |    |    |   |   |
| 7  | Wang <sup>162</sup>        | 2018 | Clinical               | No                   | No | No |   |   |
| 8  |                            |      | Rheumatology           |                      |    |    |   |   |
| 9  |                            |      | Critical Reviews in    |                      |    |    |   |   |
| 10 | Hong <sup>163</sup>        | 2018 | Oncology /             | No                   | No | No |   |   |
| 11 | de Carvalho <sup>164</sup> | 2018 | Hematology             | No                   | No | No |   |   |
| 12 |                            |      | Diabetes Care          | No                   | No | No |   |   |
| 13 | Jaafar <sup>165</sup>      | 2018 | Digestive Diseases and | No                   | No | No |   |   |
| 14 | Liu <sup>166</sup>         | 2018 | Sciences               | No                   | No | No |   |   |
| 15 |                            |      | Drug Delivery          | No                   | No | No |   |   |
| 16 |                            |      | Drug Design,           |                      |    |    |   |   |
| 17 | Liu <sup>167</sup>         | 2018 | Development and        | No                   | No | No |   |   |
| 18 |                            |      | Therapy                |                      |    |    |   |   |
| 19 | Sun <sup>168</sup>         | 2017 | Drug Design,           | No                   | No | No |   |   |
| 20 |                            |      | Development and        |                      |    |    |   |   |
| 21 | Paraschakis <sup>169</sup> | 2017 | Therapy                | No                   | No | No |   |   |
| 22 |                            |      | East Asian Archives of |                      |    |    |   |   |
| 23 | D'Souza <sup>170</sup>     | 2018 | Psychiatry             | No                   | No | No |   |   |
| 24 |                            |      | Emergency Medicine     |                      |    |    |   |   |
| 25 |                            |      | Journal                | No                   | No | No |   |   |
| 26 |                            |      | European Journal of    |                      |    |    |   |   |
| 27 | Mei <sup>171</sup>         | 2016 | Gynecological          | No                   | No | No |   |   |
| 28 |                            |      | Oncology               |                      |    |    |   |   |
| 29 | Verberkt <sup>172</sup>    | 2017 | European Respiratory   | No                   | No | No |   |   |
| 30 |                            |      | Journal                |                      |    |    |   |   |
| 31 | Sridharan <sup>173</sup>   | 2018 | Expert Opinion on      | No                   | No | No |   |   |
| 32 |                            |      | Pharmacotherapy        |                      |    |    |   |   |
| 33 | Habibi <sup>174</sup>      | 2018 | Expert Review of       | No                   | No | No |   |   |
| 34 |                            |      | Clinical Pharmacology  |                      |    |    |   |   |
| 35 | Lj <sup>175</sup>          | 2018 | Expert Review of       | No                   | No | No |   |   |
| 36 | Sangroongruangsr           | 2018 | Clinical Pharmacology  | No                   | No | No |   |   |
| 37 | i <sup>176</sup>           |      | Expert Review of       | Full                 | No | No | F |   |
| 38 |                            |      | Clinical Pharmacology  |                      |    |    |   |   |
| 39 | Hickey <sup>177</sup>      | 2018 | Foot and Ankle         | No                   | No | No |   |   |
| 40 | Zhao <sup>178</sup>        | 2018 | Surgery                | No                   | No | No |   |   |
| 41 | Khera <sup>179</sup>       | 2018 | Gastric Cancer         | Partial <sup>p</sup> | No | No | F | F |
| 42 |                            |      | Gastroenterology       |                      |    |    |   |   |
| 43 |                            |      | Gynecologic            | No                   | No | No |   |   |
| 44 | Lj <sup>180</sup>          | 2018 | Oncology               | No                   | No | No |   |   |
| 45 | Zhuge <sup>181</sup>       | 2018 | Helicobacter           | No                   | No | No |   |   |
| 46 |                            |      | Indian Journal of      |                      |    |    |   |   |
| 47 | Kim <sup>182</sup>         | 2017 | Cancer                 | No                   | No | No |   |   |
|    |                            |      | Indian Journal of      |                      |    |    |   |   |
|    | Garg <sup>183</sup>        | 2018 | Gastroenterology       | No                   | No | No |   |   |
|    | Rosanova <sup>184</sup>    | 2017 | Infectious Diseases    | No                   | No | No |   |   |
|    |                            |      | Inflammopharmacolog    |                      |    |    |   |   |
|    | Yu <sup>185</sup>          | 2018 | y                      | No                   | No | No |   |   |



|    |                             |      |                       |                      |    |    |   |   |
|----|-----------------------------|------|-----------------------|----------------------|----|----|---|---|
| 1  |                             |      |                       |                      |    |    |   |   |
| 2  |                             |      |                       |                      |    |    |   |   |
| 3  |                             |      | International         |                      |    |    |   |   |
| 4  | Kakkos <sup>186</sup>       | 2018 | Angiology             | No                   | No | No |   |   |
| 5  | Ou <sup>187</sup>           | 2018 | International         | Full                 | No | No | F |   |
| 6  |                             |      | Immunopharmacology    |                      |    |    |   |   |
| 7  | Yin <sup>188</sup>          | 2018 | International         | No                   | No | No |   |   |
| 8  |                             |      | Immunopharmacology    |                      |    |    |   |   |
| 9  | Zhu <sup>189</sup>          | 2018 | International Journal | No                   | No | No |   |   |
| 10 |                             |      | of Clinical Oncology  |                      |    |    |   |   |
| 11 | Liu <sup>190</sup>          | 2018 | International Journal | No                   | No | No |   |   |
| 12 |                             |      | of Neuroscience       |                      |    |    |   |   |
| 13 | Coccolini <sup>191</sup>    | 2018 | International Journal | No                   | No | No |   |   |
| 14 |                             |      | of Surgery            |                      |    |    |   |   |
| 15 | Fan <sup>192</sup>          | 2018 | International Journal | No                   | No | No |   |   |
| 16 |                             |      | of Surgery            |                      |    |    |   |   |
| 17 | Li <sup>193</sup>           | 2018 | International Journal | No                   | No | No |   |   |
| 18 |                             |      | of Surgery            |                      |    |    |   |   |
| 19 | Li <sup>194</sup>           | 2018 | International Journal | No                   | No | No |   |   |
| 20 |                             |      | of Surgery            |                      |    |    |   |   |
| 21 | Liu <sup>195</sup>          | 2018 | International Journal | No                   | No | No |   |   |
| 22 |                             |      | of Surgery            |                      |    |    |   |   |
| 23 | Ran <sup>196</sup>          | 2018 | International Journal | No <sup>†</sup>      | No | No |   |   |
| 24 |                             |      | of Surgery            |                      |    |    |   |   |
| 25 | Zhao <sup>197</sup>         | 2018 | International Journal | No                   | No | No |   |   |
| 26 |                             |      | of Surgery            |                      |    |    |   |   |
| 27 | Zhu <sup>198</sup>          | 2018 | International Journal | No                   | No | No |   |   |
| 28 |                             |      | Journal of Affective  |                      |    |    |   |   |
| 29 | Wagner <sup>199</sup>       | 2018 | Disorders             | Partial              | No | No | F |   |
| 30 |                             |      | Journal of Assisted   |                      |    |    |   |   |
| 31 | Hickman <sup>200</sup>      | 2018 | Reproduction and      | No                   | No | No |   |   |
| 32 |                             |      | Genetics              |                      |    |    |   |   |
| 33 | Luo <sup>201</sup>          | 2018 | Journal of Cancer     | No                   | No | No |   |   |
| 34 |                             |      | Research and Clinical |                      |    |    |   |   |
| 35 |                             |      | Oncology              |                      |    |    |   |   |
| 36 | Wang <sup>202</sup>         | 2018 | Journal of Cancer     | Partial <sup>†</sup> | No | No | F | F |
| 37 |                             |      | Research and          |                      |    |    |   |   |
| 38 | Wang <sup>203</sup>         | 2018 | Therapeutics          | No                   | No | No |   |   |
| 39 |                             |      | Journal of Cardiac    |                      |    |    |   |   |
| 40 | Aboul-Hassan <sup>204</sup> | 2017 | Surgery               | No                   | No | No |   |   |
| 41 |                             |      | Journal of            |                      |    |    |   |   |
| 42 |                             |      | Cardiovascular        |                      |    |    |   |   |
| 43 | Wang <sup>205</sup>         | 2018 | Surgery               | No                   | No | No |   |   |
| 44 |                             |      | Journal of Clinical   |                      |    |    |   |   |
| 45 |                             |      | Endocrinology and     |                      |    |    |   | F |
| 46 | Barrionuevo <sup>206</sup>  | 2018 | Metabolism            | Full                 | No | No | F |   |
| 47 |                             |      |                       |                      |    |    |   |   |

1  
2  
3  
4  
5  
6  
7  
8  
9  
10  
11  
12  
13  
14  
15  
16  
17  
18  
19  
20  
21  
22  
23  
24  
25  
26  
27  
28  
29  
30  
31  
32  
33  
34  
35  
36  
37  
38  
39  
40  
41  
42  
43  
44  
45  
46  
47

|                            |      |                                                                |                   |    |    |   |
|----------------------------|------|----------------------------------------------------------------|-------------------|----|----|---|
| Cui <sup>207</sup>         | 2018 | Journal of Clinical Pharmacy and Therapeutics                  | Full <sup>s</sup> | No | No | F |
| Sawyer <sup>208</sup>      | 2018 | Journal of Dermatological Treatment                            | No                | No | No |   |
| Markey <sup>209</sup>      | 2018 | Journal of Emergency Medicine                                  | No                | No | No |   |
| Szabó <sup>210</sup>       | 2017 | Journal of Gastrointestinal and Liver Diseases                 | No                | No | No |   |
| Su <sup>211</sup>          | 2018 | Journal of Immunology Research                                 | No                | No | No |   |
| Chen <sup>212</sup>        | 2018 | Journal of Interventional Cardiac Electrophysiology            | No                | No | No |   |
| Chen <sup>213</sup>        | 2017 | Journal of Orthopaedic Surgery and Research                    | No                | No | No |   |
| Li <sup>214</sup>          | 2018 | Journal of Orthopaedic Surgery and Research                    | No                | No | No |   |
| Luo <sup>215</sup>         | 2018 | Journal of Orthopaedic Surgery and Research                    | No                | No | No |   |
| Ma <sup>216</sup>          | 2018 | Journal of Orthopaedic Surgery and Research                    | No                | No | No |   |
| He <sup>217</sup>          | 2018 | Journal of Psychiatric Research                                | Full              | No | No | F |
| Wang <sup>218</sup>        | 2018 | Journal of Stroke & Cerebrovascular Diseases                   | No                | No | No |   |
| Dhana <sup>219</sup>       | 2018 | Journal of the American Academy of Dermatology                 | No                | No | No |   |
| Karatasakis <sup>220</sup> | 2017 | Journal of the American Heart Association                      | No                | No | No |   |
| Kuo <sup>221</sup>         | 2018 | Journal of the European Academy of Dermatology and Venereology | Full              | No | No |   |
| Liu <sup>222</sup>         | 2016 | Journal of Traditional Chinese Medicine                        | No                | No | No |   |
| Zheng <sup>223</sup>       | 2017 | Journal of Zhejiang University-SCIENCE B                       | No                | No | No |   |
| Fregonese <sup>224</sup>   | 2018 | Lancet Respiratory Medicine                                    | No                | No | No |   |
| Bornstein <sup>225</sup>   | 2018 | Neurological Sciences                                          | No                | No | No |   |
| Chen <sup>226</sup>        | 2018 | Ophthalmic Research                                            | No                | No | No |   |
| Han <sup>227</sup>         | 2017 | Pain Physician                                                 | No                | No | No |   |
| Peng <sup>228</sup>        | 2017 | Pain Physician                                                 | No                | No | No |   |

|    |                            |      |                                     |         |    |         |   |
|----|----------------------------|------|-------------------------------------|---------|----|---------|---|
| 3  | Feng <sup>229</sup>        | 2016 | Pharmazie                           | No      | No | No      |   |
| 4  | Xu <sup>230</sup>          | 2016 | Pharmazie                           | No      | No | No      |   |
| 5  | Palmeirim <sup>231</sup>   | 2018 | PLOS Neglected<br>Tropical Diseases | No      | No | No      |   |
| 6  |                            |      | Psychotherapy and                   |         |    |         |   |
| 7  | Furukawa <sup>232</sup>    | 2018 | Psychosomatics                      | No      | No | No      |   |
| 8  | Liu <sup>233</sup>         | 2018 | Renal Failure                       | No      | No | No      |   |
| 9  | Miravittles <sup>234</sup> | 2017 | Respiratory Research                | Full    | No | No      | F |
| 10 | Wang <sup>235</sup>        | 2017 | Respiratory Research                | No      | No | No      |   |
| 11 |                            |      | Rheumatology                        |         |    |         |   |
| 12 | Kawalec <sup>236</sup>     | 2018 | International                       | No      | No | No      |   |
| 13 | Malhotra <sup>237</sup>    | 2018 | Stroke                              | No      | No | No      |   |
| 14 |                            |      | Surgical Laparoscopy                |         |    |         |   |
| 15 |                            |      | Endoscopy &<br>Percutaneous         |         |    |         |   |
| 16 | Zhang <sup>238</sup>       | 2018 | Techniques                          | No      | No | No      |   |
| 17 | Yamashita <sup>239</sup>   | 2018 | Thrombosis Research                 | No      | No | Partial | E |
| 18 | Zhang <sup>240</sup>       | 2018 | Vaccine                             | No      | No | No      |   |
| 19 | <b>Other (n = 10)</b>      |      |                                     |         |    |         |   |
| 20 |                            |      | Medical Science                     |         |    |         |   |
| 21 | Chen <sup>241</sup>        | 2018 | Monitor                             | No      | No | No      |   |
| 22 | Arteagoitia <sup>242</sup> | 2018 | PLOS ONE                            | No      | No | No      |   |
| 23 | Feng <sup>243</sup>        | 2018 | PLOS ONE                            | No      | No | No      |   |
| 24 | Kawakami <sup>244</sup>    | 2018 | PLOS ONE                            | No      | No | No      |   |
| 25 | Lj <sup>245</sup>          | 2018 | PLOS ONE                            | No      | No | No      |   |
| 26 | Lin <sup>246</sup>         | 2017 | PLOS ONE                            | No      | No | No      |   |
| 27 | Ling <sup>247</sup>        | 2018 | PLOS ONE                            | No      | No | No      |   |
| 28 | Rohner <sup>248</sup>      | 2017 | PLOS ONE                            | No      | No | No      |   |
| 29 | Sethi <sup>249</sup>       | 2018 | PLOS ONE                            | Partial | No | No      | F |
| 30 | Wolf <sup>250</sup>        | 2018 | PLOS ONE                            | No      | No | No      |   |

<sup>a</sup>Funding sources categorized as government funded, industry funded, or mixed for most trials. Specific details about funding were reported for 2 trials and details on author ties and employment were reported for a single trial; <sup>b</sup>Authors reported extracting funding sources from included RCTs but funding sources are only reported for a single study; <sup>c</sup>Reported funding sources for all included studies except for one; <sup>d</sup>Reported author financial ties for all included studies except for 2; <sup>e</sup>Non-industry author employment reported for some included RCTs; <sup>f</sup>Funding sources and author ties reported for all included RCTs except one that was a conference abstract; <sup>g</sup>Funding sources only reported for a single RCT; <sup>h</sup>Authors reported whether or not included RCTs had declared COI (yes, no) and, if yes, indicated the page of the original study the declaration could be found on. This was coded as partially reporting because the nature of these COI was not reported within the meta-analysis publication itself and it was unclear whether these were financial ties and whether they were with industry; <sup>i</sup>Non-industry author financial ties reported for some included RCTs; <sup>j</sup>A single RCT was reported as 'industry sponsored' with no specifics about the sponsor; <sup>k</sup>Authors coded studies as sponsored by industry or not, and any of author industry affiliation, industry funding, or data obtained from pharmaceutical company qualified an RCT as 'sponsored'; <sup>l</sup>Authors report that 'some trials had a high risk of reporting bias because they were sponsored by pharmaceutical companies' but do not specify which or even how many trials; <sup>m</sup>Authors reported that all included RCTs had authors with financial ties to industry but provided no further information; <sup>n</sup>Reported whether each included RCT was industry funded (yes or no) but provided no further information; <sup>o</sup>For some analyses the authors reported how many included RCTs were non-commercially funded and present results including only non-commercially funded trials, but do not provide further information on which trials were commercially funded; <sup>p</sup>Authors state 14 trials were industry-sponsored and reference figure 1 in the supplementary material where 14 studies were marked as high risk for other bias, but it is not explicitly specified what was considered as 'other bias'; <sup>q</sup>Authors considered RCT funding sources within 'other bias'. In their risk of bias assessment but did not report any specific information; <sup>r</sup>Authors report that most studies were funded by the pharmaceutical industry and refer readers to figure 2 (risk of bias figure), but the figure does not give any information about which RCTs; <sup>s</sup>Included RCTs were coded as having company funding (Yes/No).

## References for eTable1 and eTable2

1. Abdel-Rahman O, Elsayed Z, Elhalawani H. Gemcitabine-based chemotherapy for advanced biliary tract carcinomas. *Cochrane Database of Syst Rev*. 2018;4.
2. Adams SP, Sekhon SS, Tsang M, Wright JM. Fluvastatin for lowering lipids. *Cochrane Database of Syst Rev*. 2018;3.
3. Agabio R, Trogu E, Pani PP. Antidepressants for the treatment of people with co-occurring depression and alcohol dependence. *Cochrane Database of Syst Rev*. 2018;4.
4. Al-Shahi Salman, Law ZK, Bath PM, Steiner T, Sprigg N. Haemostatic therapies for acute spontaneous intracerebral haemorrhage. *Cochrane Database of Syst Rev*. 2018;4.
5. Alabed S, Latifeh Y, Mohammad HA, Bergman H. Gamma-aminobutyric acid agonists for antipsychotic-induced tardive dyskinesia. *Cochrane Database of Syst Rev*. 2018;4.
6. Allegretti AS, Israelsen M, Krag A, Jovani M, Goldin AH, Schulman AR, et al. Terlipressin versus placebo or no intervention for people with cirrhosis and hepatorenal syndrome. *Cochrane Database of Syst Rev*. 2017;6.
7. Arechabala MC, Catoni MI, Claro JC, Rojas NP, Rubio ME, Calvo MA, et al. Antimicrobial lock solutions for preventing catheter-related infections in haemodialysis. *Cochrane Database of Syst Rev*. 2018;4.
8. Baandrup L, Ebdrup BH, JØ R, Lindschou J, Gluud C, Glenthøj BY. Pharmacological interventions for benzodiazepine discontinuation in chronic benzodiazepine users. *Cochrane Database of Syst Rev*. 2018;3.
9. Bala MM, Paszek E, Lesniak W, Wloch-Kopec D, Jasinska K, Undas A. Antiplatelet and anticoagulant agents for primary prevention of thrombosis in individuals with antiphospholipid antibodies. *Cochrane Database of Syst Rev*. 2018;7.
10. Barbato A, Avanzo BD, Parabiaghi A. Couple therapy for depression. *Cochrane Database of Syst Rev*. 2018;6.
11. Bergman H, Bhoopathi PS, Soares-Weiser K. Benzodiazepines for antipsychotic-induced tardive dyskinesia. *Cochrane Database of Syst Rev*. 2018;1.
12. Bighelli I, Castellazzi M, Cipriani A, Girlanda F, Guaiana G, Koesters M, et al. Antidepressants versus placebo for panic disorder in adults. *Cochrane Database of Syst Rev*. 2018;4.

13. Birks JS, Harvey RJ. Donepezil for dementia due to Alzheimer's disease. *Cochrane Database of Syst Rev*. 2018;6.
14. Boyapati RK, Torres J, Palmela C, Parker CE, Silverberg OM, Upadhyaya SD, et al. Withdrawal of immunosuppressant or biologic therapy for patients with quiescent Crohn's disease. *Cochrane Database of Syst Rev*. 2018;5.
15. Brown J, Crawford TJ, Datta S, Prentice A. Oral contraceptives for pain associated with endometriosis. *Cochrane Database of Syst Rev*. 2018;5.
16. Bruins Slot KMH, Berge E. Factor Xa inhibitors versus vitamin K antagonists for preventing cerebral or systemic embolism in patients with atrial fibrillation. *Cochrane Database of Syst Rev*. 2018;3.
17. Bryan EJ, Purcell MA, Kumar A. Zuclopenthixol dihydrochloride for schizophrenia. *Cochrane Database of Syst Rev*. 2017;11.
18. Bryant-Smith AC, Lethaby A, Farquhar C, Hickey M. Antifibrinolytics for heavy menstrual bleeding. *Cochrane Database of Syst Rev*. 2018;4.
19. Burry L, Mehta S, Perreault MM, Luxenberg JS, Siddiqi N, Hutton B, et al. Antipsychotics for treatment of delirium in hospitalised non-ICU patients. *Cochrane Database of Syst Rev*. 2018;6.
20. Campschröer T, Zhu X, Vernooij RW, Lock MT. Alpha-blockers as medical expulsive therapy for ureteral stones. *Cochrane Database of Syst Rev*. 2018;4.
21. Candy B, Jones L, Vickerstaff V, Larkin PJ, Stone P. Mu-opioid antagonists for opioid-induced bowel dysfunction in people with cancer and people receiving palliative care. *Cochrane Database of Syst Rev*. 2018;6.
22. Chiew AL, Glud C, Brok J, Buckley NA. Interventions for paracetamol (acetaminophen) overdose. *Cochrane Database of Syst Rev*. 2018;2.
23. Das RR, Singh M, Naik SS. Vitamin D as an adjunct to antibiotics for the treatment of acute childhood pneumonia. *Cochrane Database of Syst Rev*. 2018;7.
24. Demicheli V, Jefferson T, Ferroni E, Rivetti A, Pietrantonj CD. Vaccines for preventing influenza in healthy adults. *Cochrane Database of Syst Rev*. 2018;2.
25. Demicheli V, Jefferson T, Pietrantonj CD, Ferroni E, Thorning S, Thomas RE, et al. Vaccines for preventing influenza in the elderly. *Cochrane Database of Syst Rev*. 2018;2.

- 1  
2  
3 26. Di Nisio M, Wichers IM, Middeldorp S. Treatment for superficial thrombophlebitis of  
4 the leg. *Cochrane Database of Syst Rev.* 2018;2.  
5
- 6  
7 27. El-Sayeh HG, Rathbone J, Soares-Weiser K, Bergman H. Non-antipsychotic  
8 catecholaminergic drugs for antipsychotic-induced tardive dyskinesia. *Cochrane*  
9 *Database of Syst Rev.* 2018;1.  
10
- 11  
12 28. Engelen ET, Schutgens RE, Mauser-Bunschoten EP, Es RJv, Galen KPv. Antifibrinolytic  
13 therapy for preventing oral bleeding in people on anticoagulants undergoing minor oral  
14 surgery or dental extractions. *Cochrane Database of Syst Rev.* 2018;7.  
15
- 16  
17 29. Eshun-Wilson I, Siegfried N, Akena DH, Stein DJ, Obuku EA, Joska JA. Antidepressants  
18 for depression in adults with HIV infection. *Cochrane Database of Syst Rev.* 2018;1.  
19
- 20  
21 30. Essali A, Soares-Weiser K, Bergman H, Adams CE. Calcium channel blockers for  
22 antipsychotic-induced tardive dyskinesia. *Cochrane Database of Syst Rev.* 2018;3.  
23
- 24  
25 31. Everitt H, Baldwin DS, Stuart B, Lipinska G, Mayers A, Malizia AL, et al.  
26 Antidepressants for insomnia in adults. *Cochrane Database of Syst Rev.* 2018;5.  
27
- 28  
29 32. Fanshawe TR, Halliwell W, Lindson N, Aveyard P, Livingstone-Banks J, Hartmann-  
30 Boyce J. Tobacco cessation interventions for young people. *Cochrane Database of Syst*  
31 *Rev.* 2017;11.  
32
- 33  
34 33. Franik S, Eltrop SM, Kremer JA, Kiesel L, Farquhar C. Aromatase inhibitors (letrozole)  
35 for subfertile women with polycystic ovary syndrome. *Cochrane Database of Syst Rev.*  
36 2018;5.  
37
- 38  
39 34. González R, Pons-Duran C, Piqueras M, Aponte JJ, Kuile FOT, Menéndez C.  
40 Mefloquine for preventing malaria in pregnant women. *Cochrane Database of Syst Rev.*  
41 2018;3.  
42
- 43  
44 35. Grabosch SM, Shariff OM, Helm CW. Non-steroidal anti-inflammatory agents to induce  
45 regression and prevent the progression of cervical intraepithelial neoplasia. *Cochrane*  
46 *Database of Syst Rev.* 2018;2.  
47
- 48  
49 36. Graves PM, Choi L, Gelband H, Garner P. Primaquine or other 8-aminoquinolines for  
50 reducing Plasmodium falciparum transmission. *Cochrane Database of Syst Rev.* 2018;2.  
51
- 52  
53 37. Haas DM, Morgan S, Contreras K, Enders S. Vaginal preparation with antiseptic solution  
54 before cesarean section for preventing postoperative infections. *Cochrane Database of*  
55 *Syst Rev.* 2018;7.  
56  
57  
58  
59  
60

- 1  
2  
3 38. Hakoum MB, Kahale LA, Tsoiakian IG, Matar CF, Yosucio VE, Terrenato I, et al.  
4 Anticoagulation for the initial treatment of venous thromboembolism in people with  
5 cancer. *Cochrane Database of Syst Rev.* 2018;1.  
6  
7  
8 39. Heras-Mosteiro J, Monge-Maillo B, Pinart M, Pereira PL, Reveiz L, Garcia-Carrasco E,  
9 et al. Interventions for Old World cutaneous leishmaniasis. *Cochrane Database of Syst*  
10 *Rev.* 2017;12.  
11  
12  
13 40. Janmaat VT, Steyerberg EW, Gaast Avd, Mathijssen RH, Bruno MJ, Peppelenbosch MP,  
14 et al. Palliative chemotherapy and targeted therapies for esophageal and gastroesophageal  
15 junction cancer. *Cochrane Database of Syst Rev.* 2017;11.  
16  
17  
18 41. Jefferson T, Rivetti A, Pietrantonj CD, Demicheli V. Vaccines for preventing influenza in  
19 healthy children. *Cochrane Database of Syst Rev.* 2018;2.  
20  
21  
22 42. Jung JH, Kim J, MacDonald R, Reddy B, Kim MH, Dahm P. Silodosin for the treatment  
23 of lower urinary tract symptoms in men with benign prostatic hyperplasia. *Cochrane*  
24 *Database of Syst Rev.* 2017;11.  
25  
26  
27 43. Kaempfen S, Neumann RP, Jost K, Schulzke SM. Beta-blockers for prevention and  
28 treatment of retinopathy of prematurity in preterm infants. *Cochrane Database of Syst*  
29 *Rev.* 2018;3.  
30  
31  
32 44. Kahale LA, Hakoum MB, Tsoiakian IG, Matar CF, Barba M, Yosucio VED, et al. Oral  
33 anticoagulation in people with cancer who have no therapeutic or prophylactic indication  
34 for anticoagulation. *Cochrane Database of Syst Rev.* 2017;12.  
35  
36  
37 45. Kahale LA, Tsoiakian IG, Hakoum MB, Matar CF, Barba M, Yosucio VE, et al.  
38 Anticoagulation for people with cancer and central venous catheters. *Cochrane Database*  
39 *of Syst Rev.* 2018;6.  
40  
41  
42 46. Kahale LA, Hakoum MB, Tsoiakian IG, Matar CF, Terrenato I, Sperati F, et al.  
43 Anticoagulation for the long-term treatment of venous thromboembolism in people with  
44 cancer. *Cochrane Database of Syst Rev.* 2018;6.  
45  
46  
47 47. Kapur N, Petsky HL, Bell S, Kolbe J, Chang AB. Inhaled corticosteroids for  
48 bronchiectasis. *Cochrane Database of Syst Rev.* 2018;5.  
49  
50  
51 48. Kelly C, Chalmers JD, Crossingham I, Relph N, Felix LM, Evans DJ, et al. Macrolide  
52 antibiotics for bronchiectasis. *Cochrane Database of Syst Rev.* 2018;3.  
53  
54  
55  
56  
57  
58  
59

- 1  
2  
3 49. Knightly R, Milan SJ, Hughes R, Knopp-Sihota JA, Rowe BH, Normansell R, et al.  
4  
5 Inhaled magnesium sulfate in the treatment of acute asthma. *Cochrane Database of Syst*  
6  
7 *Rev.* 2017;11.
- 8  
9 50. Kopsaftis Z, Wood-Baker R, Poole P. Influenza vaccine for chronic obstructive  
10  
11 pulmonary disease (COPD). *Cochrane Database of Syst Rev.* 2018;6.
- 12  
13 51. Lawrie TA, Green JT, Beresford M, Wedlake L, Burden S, Davidson SE, et al.  
14  
15 Interventions to reduce acute and late adverse gastrointestinal effects of pelvic  
16  
17 radiotherapy for primary pelvic cancers. *Cochrane Database of Syst Rev.* 2018;1.
- 18  
19 52. Leathersich SJ, Vogel JP, Tran TS, Hofmeyr GJ. Acute tocolysis for uterine tachysystole  
20  
21 or suspected fetal distress. *Cochrane Database of Syst Rev.* 2018;7.
- 22  
23 53. Lethaby A, Puscasiu L, Vollenhoven B. Preoperative medical therapy before surgery for  
24  
25 uterine fibroids. *Cochrane Database of Syst Rev.* 2017;11.
- 26  
27 54. López-Briz E, Garcia VR, Cabello JB, Bort-Martí S, Sanchis RC, Burls A. Heparin  
28  
29 versus 0.9% sodium chloride locking for prevention of occlusion in central venous  
30  
31 catheters in adults. *Cochrane Database of Syst Rev.* 2018;7.
- 32  
33 55. Marchant JM, Petsky HL, Morris PS, Chang AB. Antibiotics for prolonged wet cough in  
34  
35 children. *Cochrane Database of Syst Rev.* 2018;7.
- 36  
37 56. Matar HE, Almerie MQ, Sampson SJ. Fluphenazine (oral) versus placebo for  
38  
39 schizophrenia. *Cochrane Database of Syst Rev.* 2018;6.
- 40  
41 57. Matar CF, Kahale LA, Hakoum MB, Tsoiakian IG, Etxeandia-Ikobaltzeta I, Yosuico VE,  
42  
43 et al. Anticoagulation for perioperative thromboprophylaxis in people with cancer.  
44  
45 *Cochrane Database of Syst Rev.* 2018;7.
- 46  
47 58. McNicol ED, Rowe E, Cooper TE. Ketorolac for postoperative pain in children.  
48  
49 *Cochrane Database of Syst Rev.* 2018;7.
- 50  
51 59. McTague A, Martland T, Appleton R. Drug management for acute tonic-clonic  
52  
53 convulsions including convulsive status epilepticus in children. *Cochrane Database of*  
54  
55 *Syst Rev.* 2018;1.
- 56  
57 60. Mhaskar R, Kumar A, Miladinovic B, Djulbegovic B. Bisphosphonates in multiple  
58  
59 myeloma: an updated network meta-analysis. *Cochrane Database of Syst Rev.* 2017;12.
- 60  
61. Milligan R, Paul M, Richardson M, Neuberger A. Vaccines for preventing typhoid fever.  
*Cochrane Database of Syst Rev.* 2018;5.



- 1  
2  
3 62. Monk AB, Harrison JE, Worthington HV, Teague A. Pharmacological interventions for  
4 pain relief during orthodontic treatment. *Cochrane Database of Syst Rev.* 2017;11.  
5  
6 63. Montero N, Favà A, Rodriguez E, Barrios C, Cruzado JM, Pascual J, et al. Treatment for  
7 hepatitis C virus-associated mixed cryoglobulinaemia. *Cochrane Database of Syst Rev.*  
8 2018;5.  
9  
10 64. Mücke M, Phillips T, Radbruch L, Petzke F, Häuser W. Cannabis-based medicines for  
11 chronic neuropathic pain in adults. *Cochrane Database of Syst Rev.* 2018;3.  
12  
13 65. Narula N, Dhillon A, Zhang D, Sherlock ME, Tondeur M, Zachos M. Enteral nutritional  
14 therapy for induction of remission in Crohn's disease. *Cochrane Database of Syst Rev.*  
15 2018;4.  
16  
17 66. Nevitt SJ, Sudell M, Weston J, Smith CT, Marson AG. Antiepileptic drug monotherapy  
18 for epilepsy: a network meta-analysis of individual participant data. *Cochrane Database*  
19 *of Syst Rev.* 2017;12.  
20  
21 67. Nevitt SJ, Smith CT, Weston J, Marson AG. Lamotrigine versus carbamazepine  
22 monotherapy for epilepsy: an individual participant data review. *Cochrane Database of*  
23 *Syst Rev.* 2018;6.  
24  
25 68. Norman G, Westby MJ, Rithalia AD, Stubbs N, Soares MO, Dumville JC. Dressings and  
26 topical agents for treating venous leg ulcers. *Cochrane Database of Syst Rev.* 2018;6.  
27  
28 69. Normansell R, Sayer B, Waterson S, Dennett EJ, Forno MD, Dunleavy A. Antibiotics for  
29 exacerbations of asthma. *Cochrane Database of Syst Rev.* 2018;6.  
30  
31 70. Novoa M, Baselga E, Beltran S, Giraldo L, Shahbaz A, Pardo-Hernandez H, et al.  
32 Interventions for infantile haemangiomas of the skin. *Cochrane Database of Syst Rev.*  
33 2018;4.  
34  
35 71. Ohlsson A, Aher SM. Early erythropoiesis-stimulating agents in preterm or low birth  
36 weight infants. *Cochrane Database of Syst Rev.* 2017;11.  
37  
38 72. Ostinelli EG, Jajawi S, Spyridi S, Sayal K, Jayaram MB. Aripiprazole (intramuscular) for  
39 psychosis-induced aggression or agitation (rapid tranquillisation). *Cochrane Database of*  
40 *Syst Rev.* 2018;1.  
41  
42 73. Ostinelli EG, Hussein M, Ahmed U, Rehman FU, Miramontes K, Adams CE.  
43 Risperidone for psychosis-induced aggression or agitation (rapid tranquillisation).  
44 *Cochrane Database of Syst Rev.* 2018;4.  
45  
46  
47  
48  
49  
50  
51  
52  
53  
54  
55  
56  
57  
58  
59  
60

- 1  
2  
3 74. Ostuzzi G, Matcham F, Dauchy S, Barbui C, Hotopf M. Antidepressants for the treatment  
4 of depression in people with cancer. *Cochrane Database of Syst Rev.* 2018;4.  
5  
6  
7 75. Parker CE, Nguyen TM, Segal D, MacDonald JK, Chande N. Low dose naltrexone for  
8 induction of remission in Crohn's disease. *Cochrane Database of Syst Rev.* 2018;4.  
9  
10 76. Pasquali S, Hadjinicolaou AV, Sileni VC, Rossi CR, Mocellin S. Systemic treatments for  
11 metastatic cutaneous melanoma. *Cochrane Database of Syst Rev.* 2018;2.  
12  
13 77. Pike KC, Akhbari M, Kneale D, Harris KM. Interventions for autumn exacerbations of  
14 asthma in children. *Cochrane Database of Syst Rev.* 2018;3.  
15  
16  
17 78. Rirash F, Tingey PC, Harding SE, Maxwell LJ, Ghogomu ET, Wells GA, et al. Calcium  
18 channel blockers for primary and secondary Raynaud's phenomenon. *Cochrane Database*  
19 *of Syst Rev.* 2017;12.  
20  
21  
22 79. Robertson L, Yeoh SE, Ramli A. Secondary prevention of recurrent venous  
23 thromboembolism after initial oral anticoagulation therapy in patients with unprovoked  
24 venous thromboembolism. *Cochrane Database of Syst Rev.* 2017;12.  
25  
26  
27 80. Romero L, Huerfano C, Grillo-Ardila CF. Macrolides for treatment of *Haemophilus*  
28 *ducreyi* infection in sexually active adults. *Cochrane Database of Syst Rev.* 2017;12.  
29  
30  
31 81. Rosumeck S, Nast A, Dressler C. Ivermectin and permethrin for treating scabies.  
32 *Cochrane Database of Syst Rev.* 2018;4.  
33  
34  
35 82. Rüschen H, Aravinth K, Bunce C, Bokre D. Use of hyaluronidase as an adjunct to local  
36 anaesthetic eye blocks to reduce intraoperative pain in adults. *Cochrane Database of Syst*  
37 *Rev.* 2018;3.  
38  
39  
40 83. Ruthirakuhan MT, Herrmann N, Abraham EH, Chan S, Lanctôt KL. Pharmacological  
41 interventions for apathy in Alzheimer's disease. *Cochrane Database of Syst Rev.* 2018;5.  
42  
43  
44 84. Sankar MJ, Sankar J, Chandra P. Anti-vascular endothelial growth factor (VEGF) drugs  
45 for treatment of retinopathy of prematurity. *Cochrane Database of Syst Rev.* 2018;1.  
46  
47  
48 85. Schumann J, Henrich EC, Strobl H, Prondzinsky R, Weiche S, Thiele H, et al. Inotropic  
49 agents and vasodilator strategies for the treatment of cardiogenic shock or low cardiac  
50 output syndrome. *Cochrane Database of Syst Rev.* 2018;1.  
51  
52  
53 86. Simancas-Racines D, Arevalo-Rodriguez I, Osorio D, Franco JV, Xu Y, Hidalgo R.  
54 Interventions for treating acute high altitude illness. *Cochrane Database of Syst Rev.*  
55 2018;6.  
56  
57  
58  
59  
60

- 1  
2  
3 87. Smith S, Edwards CT. Long-acting inhaled bronchodilators for cystic fibrosis. *Cochrane*  
4 *Database of Syst Rev.* 2017;12.  
5  
6 88. Smith LA, Burns E, Cuthbert A. Parenteral opioids for maternal pain management in  
7 labour. *Cochrane Database of Syst Rev.* 2018;6.  
8  
9 89. Soares-Weiser K, Rathbone J, Ogawa Y, Shinohara K, Bergman H. Miscellaneous  
10 treatments for antipsychotic-induced tardive dyskinesia. *Cochrane Database of Syst Rev.*  
11 2018;3.  
12  
13 90. Squizzato A, Bellesini M, Takeda A, Middeldorp S, Donadini MP. Clopidogrel plus  
14 aspirin versus aspirin alone for preventing cardiovascular events. *Cochrane Database of*  
15 *Syst Rev.* 2017;12.  
16  
17 91. St George G, Morgan A, Meechan J, Moles DR, Needleman I, Ng YL, et al. Injectable  
18 local anaesthetic agents for dental anaesthesia. *Cochrane Database of Syst Rev.* 2018;7.  
19  
20 92. Stern A, Skalsky K, Avni T, Carrara E, Leibovici L, Paul M. Corticosteroids for  
21 pneumonia. *Cochrane Database of Syst Rev.* 2017;12.  
22  
23 93. Sturman N, Deckx L, Driel MLv. Methylphenidate for children and adolescents with  
24 autism spectrum disorder. *Cochrane Database of Syst Rev.* 2017;11.  
25  
26 94. Tammenmaa-Aho I, Asher R, Soares-Weiser K, Bergman H. Cholinergic medication for  
27 antipsychotic-induced tardive dyskinesia. *Cochrane Database of Syst Rev.* 2018;3.  
28  
29 95. Temmingh HS, Williams T, Siegfried N, Stein DJ. Risperidone versus other  
30 antipsychotics for people with severe mental illness and co-occurring substance misuse.  
31 *Cochrane Database of Syst Rev.* 2018;1.  
32  
33 96. Tenforde MW, Shapiro AE, Rouse B, Jarvis JN, Li T, Eshun-Wilson I, et al. Treatment  
34 for HIV-associated cryptococcal meningitis. *Cochrane Database of Syst Rev.* 2018;7.  
35  
36 97. Toews I, George AT, Peter JV, Kirubakaran R, Fontes LES, Ezekiel JPB, et al.  
37 Interventions for preventing upper gastrointestinal bleeding in people admitted to  
38 intensive care units. *Cochrane Database of Syst Rev.* 2018;6.  
39  
40 98. Venekamp RP, Mick P, Schilder AG, Nunez DA. Grommets (ventilation tubes) for  
41 recurrent acute otitis media in children. *Cochrane Database of Syst Rev.* 2018;5.  
42  
43 99. Vermeij JD, Westendorp WF, Dippel DW, Beek Dvd, Nederkoorn PJ. Antibiotic therapy  
44 for preventing infections in people with acute stroke. *Cochrane Database of Syst Rev.*  
45 2018;1.  
46  
47  
48  
49  
50  
51  
52  
53  
54  
55  
56  
57  
58  
59  
60

- 1  
2  
3 100. Vietto V, Franco JV, Saenz V, Cytryn D, Chas J, Ciapponi A. Prostanoids for critical  
4 limb ischaemia. *Cochrane Database of Syst Rev.* 2018;1.  
5  
6  
7 101. Wall EC, Ajdukiewicz KM, Bergman H, Heyderman RS, Garner P. Osmotic therapies  
8 added to antibiotics for acute bacterial meningitis. *Cochrane Database of Syst Rev.*  
9 2018;2.  
10  
11 102. Weibel S, Jelting Y, Pace NL, Helf A, Eberhart LH, Hahnenkamp K, et al. Continuous  
12 intravenous perioperative lidocaine infusion for postoperative pain and recovery in adults.  
13 *Cochrane Database of Syst Rev.* 2018;6.  
14  
15 103. Wright JM, Musini VM, Gill R. First-line drugs for hypertension. *Cochrane Database of*  
16 *Syst Rev.* 2018;4.  
17  
18 104. Xiao Y, Luo M, Wang J, Luo H. Losigamone add-on therapy for focal epilepsy.  
19 *Cochrane Database of Syst Rev.* 2018;1.  
20  
21 105. Zhang X, Chuai Y, Nie W, Wang A, Dai G. Thrombopoietin receptor agonists for  
22 prevention and treatment of chemotherapy-induced thrombocytopenia in patients with  
23 solid tumours. *Cochrane Database of Syst Rev.* 2017;11.  
24  
25 106. Zhou M, Chen N, He L, Yang M, Zhu C, Wu F. Oxcarbazepine for neuropathic pain.  
26 *Cochrane Database of Syst Rev.* 2017;12.  
27  
28 107. Zonneveld TP, Richard E, Vergouwen MD, Nederkoorn PJ, Haan Rd, Roos YB, et al.  
29 Blood pressure-lowering treatment for preventing recurrent stroke, major vascular events,  
30 and dementia in patients with a history of stroke or transient ischaemic attack. *Cochrane*  
31 *Database of Syst Rev.* 2018;7.  
32  
33 108. López - López JA, Sterne JAC, Thom HHZ, Higgins JPT, Hingorani AD, Okoli GN, et  
34 al. Oral anticoagulants for prevention of stroke in atrial fibrillation: systematic review,  
35 network meta-analysis, and cost effectiveness analysis. *BMJ (Clinical research ed).*  
36 2017;359.  
37  
38 109. Wang W, Chen W, Liu Y, Siemieniuk RAC, Li L, Martínez JPD, et al. Antibiotics for  
39 uncomplicated skin abscesses: systematic review and network meta-analysis. *BMJ Open.*  
40 2018;8(2).  
41  
42 110. Cipriani A, Furukawa TA, Salanti G, Chaimani A, Atkinson LZ, Ogawa Y, et al.  
43 Comparative efficacy and acceptability of 21 antidepressant drugs for the acute treatment  
44  
45  
46  
47  
48  
49  
50  
51  
52  
53  
54  
55  
56  
57  
58  
59  
60

- of adults with major depressive disorder: a systematic review and network meta-analysis. *Lancet*. 2018;391(10128)1357-66.
111. Chen M, Ji M, Si X. The effects of statin therapy on mortality in patients with sepsis: A meta-analysis of randomized trials. *Medicine*. 2018;97(31).
112. Ding W, Li Z, Wang C, Ruan G, Chen L, Tu C. The CDK4/6 inhibitor in HR-positive advanced breast cancer: A systematic review and meta-analysis. *Medicine*. 2018;97(20).
113. Guo P, He Z, Wang Y, Gao F, Sun W, Guo W, et al. Efficacy and safety of oral tranexamic acid in total knee arthroplasty: A systematic review and meta-analysis. *Medicine*. 2018;97(18).
114. Han X, Zhang Y, Yin L, Zhang L, Wang Y, Zhang H, et al. Statin in the treatment of patients with myocardial infarction: A meta-analysis. *Medicine*. 2018;97(12).
115. Hu W, Tong J, Kuang X, Chen W, Liu Z. Influence of proton pump inhibitors on clinical outcomes in coronary heart disease patients receiving aspirin and clopidogrel: A meta-analysis. *Medicine*. 2018;97(3).
116. Huang ST, Tian BS, Xiao O, Yang YJ, Zhou SY. Safety of antivasular endothelial growth factor administration in the ocular anterior segment in pterygium and neovascular glaucoma treatment: Systematic review and meta-analysis. *Medicine*. 2018;97(34).
117. Jiang DQ, Xu LC, Jiang LL, Li MX, Wang Y. Fasudil combined with methylcobalamin or lipoic acid can improve the nerve conduction velocity in patients with diabetic peripheral neuropathy: A meta-analysis. *Medicine*. 2018;97(27).
118. Jiang Y, Sun X, Kong B, Jiang J. Antiangiogenesis therapy in ovarian cancer patients: An updated meta-analysis for 15 randomized controlled trials. *Medicine*. 2018;97(34).
119. Khan M, Lin J, Liao G, Tian Y, Liang Y, Li R, et al. Comparative analysis of immune checkpoint inhibitors and chemotherapy in the treatment of advanced non-small cell lung cancer: A meta-analysis of randomized controlled trials. *Medicine*. 2018;97(33).
120. Liang L, Cai Y, Li A, Ma C. The efficiency of intravenous acetaminophen for pain control following total knee and hip arthroplasty: A systematic review and meta-analysis. *Medicine*. 2017;96(46).
121. Liu X, Li X, Zhang C, Sun M, Sun Z, Xu Y, et al. Efficacy and tolerability of fluvoxamine in adults with social anxiety disorder: A meta-analysis. *Medicine*. 2018;97(28).

- 1  
2  
3 122.Lor YC, Shih PC, Chen HH, Liu SJ, Chao HC, Hwang LC, et al. The application of  
4 lidocaine to alleviate the discomfort of nasogastric tube insertion: A systematic review  
5 and meta-analysis. *Medicine*. 2018;97(5).  
6  
7  
8 123.Wang W, Yu J. Tranexamic acid reduces blood loss in intertrochanteric fractures: A  
9 meta-analysis from randomized controlled trials. *Medicine*. 2017;96(52).  
10  
11 124.Wang H, Liu A, Bo W, Feng X, Hu Y. Terlipressin in the treatment of hepatorenal  
12 syndrome: A systematic review and meta-analysis. *Medicine*. 2018;97(16).  
13  
14 125.Wang Z, Hu Z, Dai T. The comparison of propofol and midazolam for bronchoscopy: A  
15 meta-analysis of randomized controlled studies. *Medicine*. 2018;97(36).  
16  
17 126.Wei W, Luo Z. Risk of gastrointestinal toxicities with PD-1 inhibitors in cancer patients:  
18 A meta-analysis of randomized clinical trials. *Medicine*. 2017;96(48).  
19  
20 127.Woo HL, Ji HR, Pak YK, Lee H, Heo SJ, Lee JM, et al. The efficacy and safety of  
21 acupuncture in women with primary dysmenorrhea: A systematic review and meta-  
22 analysis. *Medicine*. 2018;97(23).  
23  
24 128.Xia Y, Fang H, Xu J, Jia C, Tao G, Yu B. Clinical efficacy of xenon versus propofol: A  
25 systematic review and meta-analysis. *Medicine*. 2018;97(20).  
26  
27 129.Yang Q, Zhang Z, Xin W, Li A. Preoperative intravenous glucocorticoids can decrease  
28 acute pain and postoperative nausea and vomiting after total hip arthroplasty: A  
29 PRISMA-compliant meta-analysis. *Medicine*. 2017;96(47).  
30  
31 130.Ye F, Wu Y, Zhou C. Effect of intravenous ketamine for postoperative analgesia in  
32 patients undergoing laparoscopic cholecystectomy: A meta-analysis. *Medicine*.  
33 2017;96(51).  
34  
35 131.Yu L, Cao L, Sun J, Li Z, Yao F, Zhou Y. Serelaxin, recombinant human relaxin-2, for  
36 heart failure patients: A systematic review and meta-analysis. *Medicine*. 2018;97(25).  
37  
38 132.Yuan C, Xu XH, Luo SW, Wang L, Sun M, Ni LH, et al. Which neoadjuvant  
39 chemotherapy regimen should be recommended for patients with advanced  
40 nasopharyngeal carcinoma?: A network meta-analysis. *Medicine*. 2018;97(34).  
41  
42 133.Zhang JJ, Liu X. Aspirin plus dipyridamole has the highest surface under the cumulative  
43 ranking curves (SUCRA) values in terms of mortality, intracranial hemorrhage, and  
44 adverse event rate among 7 drug therapies in the treatment of cerebral infarction.  
45  
46  
47  
48  
49  
50  
51  
52  
53  
54  
55  
56  
57  
58  
59  
60

- 1  
2  
3 134.Zhang J, Cai WK, Zhang Z, Wang P, Lin XQ, Feng J, et al. Cardioprotective effect of  
4 histamine H2 antagonists in congestive heart failure: A systematic review and meta-  
5 analysis. *Medicine*. 2018;97(15).  
6  
7  
8 135.Zhao JB, Li YL, Wang YM, Teng JL, Xia DY, Zhao JS, et al. Intravenous lidocaine  
9 infusion for pain control after laparoscopic cholecystectomy: A meta-analysis of  
10 randomized controlled trials. *Medicine*. 2018;97(5).  
11  
12  
13 136.Zhao T, Shen Z, Sheng S. The efficacy and safety of nefopam for pain relief during  
14 laparoscopic cholecystectomy: A meta-analysis. *Medicine*. 2018;97(10).  
15  
16  
17 137.Zhou G, Ma L, Jing J, Jiang H. A meta-analysis of dexamethasone for pain management  
18 in patients with total knee arthroplasty. *Medicine*. 2018;97(35).  
19  
20  
21 138.Zhu XT, Chen L, Lin JH. Selective COX-2 inhibitor versus non-selective COX-2  
22 inhibitor for the prevention of heterotopic ossification after total hip arthroplasty: A meta-  
23 analysis. *Medicine*. 2018;97(31).  
24  
25  
26 139.Zhou J, Zhang Q, Wang Y, Gao P, Chen D. The effect and safety of anacetrapib in the  
27 treatment of dyslipidemia: a systematic review and meta-analysis. *Postgrad Med*.  
28 2018;130(1):129-36.  
29  
30  
31 140.Zhang Y, Tao LN, Qu XY, Niu JQ, Ding YH, Zhang SX. Efficacy and safety of  
32 ceftazidime-avibactam in the treatment of complicated intra-abdominal infections (CIAIs)  
33 and complicated urinary tract infections (CUTIs): A meta-analysis of randomized  
34 controlled trials. *Rev Assoc Med Bras*. 2018;64(3):253-63.  
35  
36  
37 141.Li F, Huang W, Zhang X. Efficacy and safety of different regimens for primary open-  
38 angle glaucoma or ocular hypertension: a systematic review and network meta-analysis.  
39 *Acta Ophthalmol*. 2018;96(3):e277-84.  
40  
41  
42 142.Tarantini G, Ueshima D, Amico GD, Masiero G, Musumeci G, Stone GW, et al. Efficacy  
43 and safety of potent platelet P2Y12 receptor inhibitors in elderly versus nonelderly  
44 patients with acute coronary syndrome: A systematic review and meta-analysis. *Am Heart*  
45 *J*. 2018;195:78-85.  
46  
47  
48 143.Wang Y, Wang J, Wang S. Comparative Effectiveness of Inclisiran 100, 300, and 500 mg  
49 in a Population with Hyperlipidemia: A Network Meta-Analysis of Randomized  
50 Controlled Trials. *Am J Cardiovasc Drugs*. 2018;18(4):271-82.  
51  
52  
53  
54  
55  
56  
57  
58  
59  
60

- 1  
2  
3 144.Aman A, Salim B, Munshi K, Raza SA, Khan FA. Effect on neonatal outcome of  
4 pharmacological interventions for attenuation of the maternal haemodynamic response to  
5 tracheal intubation: a systematic review. *Anaesth Intensive Care*. 2018;46(3):258-71.  
6  
7  
8 145.Li GM, Zhao J, Li B, Zhang XF, Ma JX, Ma XL, et al. The anti-inflammatory effects of  
9 statins on patients with rheumatoid arthritis: A systemic review and meta-analysis of 15  
10 randomized controlled trials. *Autoimmun Rev*. 2018;17(3):215-25.  
11  
12  
13 146.Wang B, He X, Gong Y, Cheng B. Levosimendan in Patients with Left Ventricular  
14 Dysfunction Undergoing Cardiac Surgery: An Update Meta-Analysis and Trial  
15 Sequential Analysis. *BioMed Res Int*. 2018;2018:1-10.  
16  
17  
18 147.Veetil SK, Lim KG, Ching SM, Saokaew S, Phisalprapa P, Chaiyakunapruk N. Effects  
19 of aspirin and non-aspirin nonsteroidal anti-inflammatory drugs on the incidence of  
20 recurrent colorectal adenomas: a systematic review with meta-analysis and trial  
21 sequential analysis of randomized clinical trials. *BMC Cancer*. 2017;17(1):763.  
22  
23  
24 148.Bredemeier M, Lopes LM, Eisenreich MA, Hickmann S, Bongiorno GK, d'Avila R, et al.  
25 Xanthine oxidase inhibitors for prevention of cardiovascular events: a systematic review  
26 and meta-analysis of randomized controlled trials. *BMC Cardiovasc Disord*.  
27 2018;18(1):24.  
28  
29  
30 149.Lyu Y, Cheng Y, Wang B, Xu Y, Du W. What is impact of nonsteroidal anti-  
31 inflammatory drugs in the prevention of post-endoscopic retrograde  
32 cholangiopancreatography pancreatitis: a meta-analysis of randomized controlled trials.  
33 *BMC Gastroenterol*. 2018;18(1):106.  
34  
35  
36 150.Xing Y, Chen L, Feng Y, Zhou Y, Zhai Y, Lu J. Meta-analysis of the safety of  
37 voriconazole in definitive, empirical, and prophylactic therapies for invasive fungal  
38 infections. *BMC Infect Dis*. 2017;17(1):798..  
39  
40  
41 151.Kuo LT, Hsu WH, Chi CC, Yoo JC. Tranexamic acid in total shoulder arthroplasty and  
42 reverse shoulder arthroplasty: a systematic review and meta-analysis. *BMC*  
43 *Musculoskelet Disord*. 2018;19(1):60.  
44  
45  
46 152.Beez T, Steiger HJ, Etminan N. Pharmacological targeting of secondary brain damage  
47 following ischemic or hemorrhagic stroke, traumatic brain injury, and bacterial  
48 meningitis - a systematic review and meta-analysis. *BMC Neurol*. 2017;17(1):209.  
49  
50  
51  
52  
53  
54  
55  
56  
57  
58  
59



- 1  
2  
3 153.Zeng W, Liu Z, Dai H, Yan M, Luo H, Ke M, et al. Anti-fibrotic, anti-VEGF or  
4 radiotherapy treatments as adjuvants for pterygium excision: a systematic review and  
5 network meta-analysis. *BMC Ophthalmol.* 2017;17(1):211.  
6  
7  
8 154.Bundhun PK, Shi JX, Huang F. Head to head comparison of Prasugrel versus Ticagrelor  
9 in patients with acute coronary syndrome: a systematic review and meta-analysis of  
10 randomized trials. *BMC Pharmacol Toxicol.* 2017;18(1):80.  
11  
12  
13 155.Zhang Y, Liu Y, Su Y, You Y, Ma Y, Yang G, et al. The metabolic side effects of 12  
14 antipsychotic drugs used for the treatment of schizophrenia on glucose: a network meta-  
15 analysis. *BMC Psychiatry.* 2017;17(1):373.  
16  
17  
18 156.Zhang HL, Tan M, Qiu AM, Tao Z, Wang CH. Antibiotics for treatment of acute  
19 exacerbation of chronic obstructive pulmonary disease: a network meta-analysis. *BMC*  
20 *pulmonary medicine.* 2017;17(1):196.  
21  
22  
23 157.Zhang ZQ, Zhong Y, Huang XM, Du LZ. Airway administration of corticosteroids for  
24 prevention of bronchopulmonary dysplasia in premature infants: a meta-analysis with  
25 trial sequential analysis. *BMC Pulm Med.* 2017;17(1):207.  
26  
27  
28 158.Ramos-Esquivel A, Hernández-Steller H, Savard MF, Landaverde DU. Cyclin-dependent  
29 kinase 4/6 inhibitors as first-line treatment for post-menopausal metastatic hormone  
30 receptor-positive breast cancer patients: a systematic review and meta-analysis of phase  
31 III randomized clinical trials. *Breast Cancer.* 2018;25(4):479-88.  
32  
33  
34 159.Zeng C, Wei J, Persson MSM, Sarmanova A, Doherty M, Xie D, et al. Relative efficacy  
35 and safety of topical non-steroidal anti-inflammatory drugs for osteoarthritis: a systematic  
36 review and network meta-analysis of randomised controlled trials and observational  
37 studies. *Br J Sports Med.* 2018;52(10):642-50.  
38  
39  
40 160.Shui L, Wu YS, Lin H, Shui P, Sun Q, Chen X. Triplet Chemotherapy (FOLFOXIRI)  
41 Plus Bevacizumab Versus Doublet Chemotherapy (FOLFOX/FOLFIRI) Plus  
42 Bevacizumab in Conversion Therapy for Metastatic Colorectal Cancer: a Meta-Analysis.  
43 *Cell Physiol Biochem.* 2018;48(5):1870-81.  
44  
45  
46 161.Rodrigo C, Weeratunga P, Fernando SD, Rajapakse S. Amphotericin B for treatment of  
47 visceral leishmaniasis: systematic review and meta-analysis of prospective comparative  
48 clinical studies including dose-ranging studies. *Clin Microbiol Infect.* 2018;24(6):591-8.  
49  
50  
51  
52  
53  
54  
55  
56  
57  
58  
59  
60

- 1  
2  
3 162. Wang S, He Q, Shuai Z. Risk of serious infections in biological treatment of patients with  
4 ankylosing spondylitis and non-radiographic axial spondyloarthritis: a meta-analysis. *Clin*  
5 *Rheumatol.* 2018;37(2):439-50.  
6  
7  
8 163. Hong Y, Mansour S, Alotaibi G, Wu C, McMurtry MS. Effect of anticoagulants on  
9 admission rates and length of hospital stay for acute venous thromboembolism: A  
10 systematic review of randomized control trials. *Crit Rev Oncol Hematol.* 2018;125:12-18.  
11  
12 164. de Carvalho LSFd, Campos AM, Sposito AC. Proprotein Convertase Subtilisin/Kexin  
13 Type 9 (PCSK9) Inhibitors and Incident Type 2 Diabetes: A Systematic Review and  
14 Meta-analysis With Over 96,000 Patient-Years. *Diabetes Care.* 2018;41(2):364-7.  
15  
16 165. Jaafar MH, Safi SZ, Tan MP, Rampal S, Mahadeva S. Efficacy of Rebamipide in Organic  
17 and Functional Dyspepsia: A Systematic Review and Meta-Analysis. *Dig Dis Sci.*  
18 2018;63(5):1250-60.  
19  
20 166. Liu J, Wang LN. The efficacy and safety of riluzole for neurodegenerative movement  
21 disorders: a systematic review with meta-analysis. *Drug Deliv.* 2018;25(1):43-8.  
22  
23 167. Liu LY, Liu Y, Wu MY, Sun YY, Ma FZ. Efficacy of atorvastatin on the prevention of  
24 contrast-induced acute kidney injury: a meta-analysis. *Drug Des Devel Ther.*  
25 2018;12:437.  
26  
27 168. Sun S, Wang J, Bao N, Chen Y, Wang J. Comparison of dexmedetomidine and fentanyl  
28 as local anesthetic adjuvants in spinal anesthesia: a systematic review and meta-analysis  
29 of randomized controlled trials. *Drug Des Devel Ther.* 2017;11:3413.  
30  
31 169. Paraschakis A, Katsanos AH. Antidepressants for Depression Associated with Traumatic  
32 Brain Injury: A Meta-analytical Study of Randomised Controlled Trials. *East Asian Arch*  
33 *Psychiatry.* 2017;27(4):142.  
34  
35 170. D'Souza RS, Mercogliano C, Ojukwu E, Souza SD, Singles A, Modi J, et al. Effects of  
36 prophylactic anticholinergic medications to decrease extrapyramidal side effects in  
37 patients taking acute antiemetic drugs: a systematic review and meta-analysis. *Emerg*  
38 *Med J.* 2018;35(5):325-31.  
39  
40 171. Mei L, Hou Q, Fang F, Wang H. The antibody-based CA125-targeted maintenance  
41 therapy for the epithelial ovarian cancer: a meta-analysis. *Eur J Gynaecol Oncol.*  
42 2016;37(4):455-60.  
43  
44  
45  
46  
47  
48  
49  
50  
51  
52  
53  
54  
55  
56  
57  
58  
59  
60

- 1  
2  
3 172. Verberkt CA, Everdingen MHJvdB-v, Schols J, Datla S, Dirksen CD, Johnson MJ, et al.  
4 Respiratory adverse effects of opioids for breathlessness: a systematic review and meta-  
5 analysis. *Eur Respir J*. 2017;50(5):1701153.  
6  
7  
8 173. Sridharan K, Sivaramakrishnan G, Gnanaraj J. Pharmacological interventions for stress  
9 ulcer prophylaxis in critically ill patients: a mixed treatment comparison network meta-  
10 analysis and a recursive cumulative meta-analysis. *Expert Opin Pharmacother*.  
11 2018;19(2):151-8.  
12  
13  
14 174. Habibi MR, Habibi V, Habibi A, Soleimani A. Lidocaine dose-response effect on  
15 postoperative cognitive deficit: meta-analysis and meta-regression. *Expert Rev Clin*  
16 *Pharmacol*. 2018;11(4):361-71.  
17  
18  
19 175. Li Y, Liu H, Peng W, Song Z. Nicorandil improves clinical outcomes in patients with  
20 stable angina pectoris requiring PCI: a systematic review and meta-analysis of 14  
21 randomized trials. *Expert Rev Clin Pharmacol*. 2018;11(9):855-65.  
22  
23  
24 176. Sangroongruangsri S, Ratanapakorn T, Wu O, Anothaisintawee T, Chaikledkaew U.  
25 Comparative efficacy of bevacizumab, ranibizumab, and aflibercept for treatment of  
26 macular edema secondary to retinal vein occlusion: a systematic review and network  
27 meta-analysis. *Expert Rev Clin Pharmacol*. 2018;11(9):903-16.  
28  
29  
30 177. Hickey BA, Watson U, Cleves A, Alikhan R, Pugh N, Nokes L, et al. Does  
31 thromboprophylaxis reduce symptomatic venous thromboembolism in patients with  
32 below knee cast treatment for foot and ankle trauma? A systematic review and meta-  
33 analysis. *Foot Ankle Surg*. 2018;24(1):19-27.  
34  
35  
36 178. Zhao TT, Xu H, Xu HM, Wang ZN, Xu YY, Song YX, et al. The efficacy and safety of  
37 targeted therapy with or without chemotherapy in advanced gastric cancer treatment: a  
38 network meta-analysis of well-designed randomized controlled trials. *Gastric Cancer*.  
39 2018;21(3):361-71.  
40  
41  
42 179. Khera R, Pandey A, Chandar AK, Murad MH, Prokop LJ, Neeland IJ, et al. Effects of  
43 Weight-Loss Medications on Cardiometabolic Risk Profiles: A Systematic Review and  
44 Network Meta-analysis. *Gastroenterology*. 2018;154(5):1309-19.  
45  
46  
47 180. Li J, Li S, Yu H, Wang J, Xu C, Lu X. The efficacy and safety of first-line single-agent  
48 chemotherapy regimens in low-risk gestational trophoblastic neoplasia: A network meta-  
49 analysis. *Gynecol Oncol*. 2018;148(2):247-53.  
50  
51  
52  
53  
54  
55  
56  
57  
58  
59  
60

- 1  
2  
3 181. Zhuge L, Wang Y, Wu S, Zhao RL, Li Z, Xie Y. Furazolidone treatment for Helicobacter  
4 Pylori infection: A systematic review and meta-analysis. *Helicobacter*.  
5 2018;23(2):e12468.  
6  
7  
8 182. Kim MK, Myung SK, Tran BT, Park B. Statins and risk of cancer: A meta-analysis of  
9 randomized, double-blind, placebo-controlled trials. *Indian J Cancer*. 54(2):470.  
10  
11 183. Garg R, Mohan BP, Krishnamoorthi R, Rustagi T. Pre-endoscopic retrograde  
12 cholangiopancreatography (ERCP) administration of rectal indomethacin in unselected  
13 patients to reduce post-ERCP pancreatitis: A systematic review and meta-analysis. *Indian*  
14 *J Gastroenterol*. 2018;37(2):120-6.  
15  
16 184. Rosanova MT, Bes D, Aguilar PS, Sberna N, Lede R. Efficacy and safety of voriconazole  
17 in immunocompromised patients: systematic review and meta-analysis. *Infect Dis (Lond)*.  
18 2018;50(7):489-94.  
19  
20 185. Yu J, Lu H, Zhou J, Xie Z, Wen C, Xu Z. Oral prednisolone versus non-steroidal anti-  
21 inflammatory drugs in the treatment of acute gout: a meta-analysis of randomized  
22 controlled trials. *Inflammopharmacology*. 2018;26(3):717-23.  
23  
24 186. Kakkos SK, Nicolaidis AN. Efficacy of micronized purified flavonoid fraction (Daflon)  
25 on improving individual symptoms, signs and quality of life in patients with chronic  
26 venous disease: a systematic review and meta-analysis of randomized double-blind  
27 placebo-controlled trials. *Int Angiol*. 2018;37(2).  
28  
29 187. Ou Z, Chen C, Chen A, Yang Y, Zhou W. Adverse events of Dupilumab in adults with  
30 moderate-to-severe atopic dermatitis: A meta-analysis. *Intimmunopharmacol*.  
31 2018;54:303-10.  
32  
33 188. Yin J, Xu B, Zeng X, Shen K. Broncho-Vaxom in pediatric recurrent respiratory tract  
34 infections: A systematic review and meta-analysis. *Int immunopharmacol*. 2018;54:198-  
35 209.  
36  
37 189. Zhu J, Zhao W, Liang D, Li G, Qiu K, Wu J, et al. Risk of fatigue in cancer patients  
38 receiving anti-EGFR monoclonal antibodies: results from a systematic review and meta-  
39 analysis of randomized controlled trial. *Int J Clin Oncol*. 2018;23(2):389-99.  
40  
41 190. Liu H, Xu X. Influence of adjunctive lacosamide in patients with seizures: a systematic  
42 review and meta-analysis. *Int J Neurosci*. 2018;128(7):670-6.  
43  
44  
45  
46  
47  
48  
49  
50  
51  
52  
53  
54  
55  
56  
57  
58  
59  
60

- 1  
2  
3 191. Cocolini F, Nardi M, Montori G, Ceresoli M, Celotti A, Cascinu S, et al. Neoadjuvant  
4 chemotherapy in advanced gastric and esophago-gastric cancer. Meta-analysis of  
5 randomized trials. *Int J Surgery*. 2018;51:120-7.  
6  
7  
8 192. Fan Z, Ma J, Kuang M, Zhang L, Han B, Yang B, et al. The efficacy of dexamethasone  
9 reducing postoperative pain and emesis after total knee arthroplasty: A systematic review  
10 and meta-analysis. *Int J Surgery*. 2018;52:149-55.  
11  
12 193. Li J, Wang G, Xu W, Ding M, Yu W. Efficacy of intravenous lidocaine on pain relief in  
13 patients undergoing laparoscopic cholecystectomy: A meta-analysis from randomized  
14 controlled trials. *Int J Surgery*. 2018;50:137-45.  
15  
16 194. Li S, Sheng G, Teng Y, Sun M. Systematic review of anaesthetic medication for ERCP  
17 based on a network meta-analysis. *Int J Surgery*. 2018;51:56-62.  
18  
19 195. Liu Q, Geng P, Shi L, Wang Q, Wang P. Tranexamic acid versus aminocaproic acid for  
20 blood management after total knee and total hip arthroplasty: A systematic review and  
21 meta-analysis. *Int J Surgery*. 2018;54:105-12.  
22  
23 196. Ran J, Yang X, Ren Z, Wang J, Dong H. Comparison of intra-articular hyaluronic acid  
24 and methylprednisolone for pain management in knee osteoarthritis: A meta-analysis of  
25 randomized controlled trials. *Int J Surgery*. 2018;53:103-10.  
26  
27 197. Zhao M, Xiang P, Jiang H. TransArterial ChemoEmbolization (TACE) with platinum  
28 versus anthracyclines for hepatocellular carcinoma: A meta-analysis. *Int J Surgery*.  
29 2018;53:151-8.  
30  
31 198. Zhu J, Xie H, Zhang L, Chang L, Chen P. Efficiency and safety of ketamine for pain  
32 relief after laparoscopic cholecystectomy: A meta-analysis from randomized controlled  
33 trials. *Int J Surgery*. 2018;49:1-9.  
34  
35 199. Wagner G, Schultes MT, Titscher V, Teufer B, Klerings I, Gartlehner G. Efficacy and  
36 safety of levomilnacipran, vilazodone and vortioxetine compared with other second-  
37 generation antidepressants for major depressive disorder in adults: A systematic review  
38 and network meta-analysis. *J Affect Disord*. 2018;228:1-12.  
39  
40 200. Hickman LC, Llarena NC, Valentine LN, Liu X, Falcone T. Preservation of gonadal  
41 function in women undergoing chemotherapy: a systematic review and meta-analysis of  
42 the potential role for gonadotropin-releasing hormone agonists. *J Assist Reprod Genet*.  
43 2018;35(4):571-81.  
44  
45  
46  
47  
48  
49  
50  
51  
52  
53  
54  
55  
56  
57  
58  
59  
60

- 1  
2  
3 201. Luo W, Wang Z, Tian P, Li W. Safety and tolerability of PD-1/PD-L1 inhibitors in the  
4 treatment of non-small cell lung cancer: a meta-analysis of randomized controlled trials. *J*  
5 *Cancer Res Clin Oncol*. 2018;144(10):1851-9.  
6  
7  
8 202. Wang Y, Zhang H, Shen W, He P, Zhou Z. Effectiveness and tolerability of targeted  
9 drugs for the treatment of metastatic castration-resistant prostate cancer: a network meta-  
10 analysis of randomized controlled trials. *J Cancer Res Clin Oncol*. 2018;144(9):1751-68.  
11  
12 203. Wang DD, Ma TT, Zhu HD, Peng CB. Transdermal fentanyl for cancer pain: Trial  
13 sequential analysis of 3406 patients from 35 randomized controlled trials. *J Cancer Res*  
14 *Ther*. 2018;14(8):14.  
15  
16  
17 204. Aboul-Hassan SS, Stankowski T, Marczak J, Peksa M, Nawotka M, Stanislawski R, et al.  
18 The use of preoperative aspirin in cardiac surgery: A systematic review and meta-  
19 analysis. *J Card Surg*. 2017;32(12):758-74.  
20  
21 205. Wang Y, Zhu S, R DU, Zhou J, Chen Y, Zhang Q. Statin initiation and renal outcomes  
22 following isolated coronary artery bypass grafting: a meta-analysis. *J Card Surg*.  
23 2018;59(2):282-90.  
24  
25  
26 206. Barrionuevo P, Nabhan M, Altayar O, Wang Z, Erwin PJ, Asi N, et al. Treatment Options  
27 for Hirsutism: A Systematic Review and Network Meta-Analysis. *J Clin Endocrinol*  
28 *Metabo*. 2018;103(4):1258-64.  
29  
30 207. Cui JY, Zhou RR, Han S, Wang TS, Wang LQ, Xie XH. Statin therapy on glycemic  
31 control in type 2 diabetic patients: A network meta-analysis. *J Clin Pharm Ther*.  
32 2018;43(4):556-70.  
33  
34 208. Sawyer L, Fotheringham I, Wright E, Yasmeen N, Gibbons C, Møller AH. The  
35 comparative efficacy of brodalumab in patients with moderate-to-severe psoriasis: a  
36 systematic literature review and network meta-analysis. *J Dermatolog Treat*.  
37 2018;29(6):557-68.  
38  
39 209. Markey GC, Salter N, Ryan J. Intravenous Flecainide for Emergency Department  
40 Management of Acute Atrial Fibrillation. *J Emerg Med*. 2018;54(3):320-7.  
41  
42 210. Szabó IL, Mátics R, Hegyi P, Garami A, Illés A, Sarlós P, et al. PPIs Prevent Aspirin-  
43 Induced Gastrointestinal Bleeding Better than H2RAs. A Systematic Review and Meta-  
44 analysis. *J Gastrointestin Liver Dis: JGLD*. 2017;26(4):395-402.  
45  
46  
47  
48  
49  
50  
51  
52  
53  
54  
55  
56  
57  
58  
59  
60

- 1  
2  
3 211. Su Q, Zhang XC, Zhang CG, Hou YL, Yao YX, Cao BW. Risk of Immune-Related  
4 Pancreatitis in Patients with Solid Tumors Treated with Immune Checkpoint Inhibitors:  
5 Systematic Assessment with Meta-Analysis. *J Immunol Res*. 2018;2018:1-9.  
6  
7  
8 212. Chen C, Zhou X, Zhu M, Chen S, Chen J, Cai H, et al. Catheter ablation versus medical  
9 therapy for patients with persistent atrial fibrillation: a systematic review and meta-  
10 analysis of evidence from randomized controlled trials. *J Interv Card Electrophysiol*.  
11 2018;52(1):9-18.  
12  
13  
14 213. Chen X, Mou X, He Z, Zhu Y. The effect of midazolam on pain control after knee  
15 arthroscopy: a systematic review and meta-analysis. *J Orthop Surg Res*. 2017;12(1):179.  
16  
17 214. Li YJ, Xu BS, Bai SP, Guo XJ, Yan XY. The efficacy of intravenous aminocaproic acid  
18 in primary total hip and knee arthroplasty: a meta-analysis. *J Orthop Surg Res*. 2018;13(1).  
19  
20 215. Luo W, Sun RX, Jiang H, Ma XL. The efficacy and safety of topical administration of  
21 tranexamic acid in spine surgery: a meta-analysis. *J Orthop Surg Res*. 2018;13(1):96.  
22  
23 216. Ma R, Chen GH, Zhao LJ, Zhai XC. Efficacy of naproxen prophylaxis for the prevention  
24 of heterotopic ossification after hip surgery: a meta-analysis. *J Orthop Surg Res*.  
25 2018;13(1):48.  
26  
27 217. He H, Wang W, Lyu J, Zheng J, Guo L, An X, et al. Efficacy and tolerability of different  
28 doses of three new antidepressants for treating major depressive disorder: A PRISMA-  
29 compliant meta-analysis. *J Psychiatr Res*. 2018;96:247-59.  
30  
31 218. Wang KL, Chiu CC, Giugliano RP, Tan DS, Lin CY, Lai EY, et al. Drug Class, Renal  
32 Elimination, and Outcomes of Direct Oral Anticoagulants in Asian Patients: A Meta-  
33 Analysis. *J Stroke Cerebrovasc Dis* : the official journal of National Stroke Association.  
34 2018;27(4):857-64.  
35  
36 219. Dhana A, Yen H, Okhovat JP, Cho E, Keum N, Khumalo NP. Ivermectin versus  
37 permethrin in the treatment of scabies: A systematic review and meta-analysis of  
38 randomized controlled trials. *J Am Acad Dermatol*. 2018;78(1):194-98.  
39  
40 220. Karatasakis A, Danek BA, Karacsonyi J, Rangan BV, Roesle MK, Knickelbine T, et al.  
41 Effect of PCSK9 Inhibitors on Clinical Outcomes in Patients With Hypercholesterolemia:  
42 A Meta-Analysis of 35 Randomized Controlled Trials. *J Am Heart Assoc*.  
43 2017;6(12):e006910.  
44  
45  
46  
47  
48  
49  
50  
51  
52  
53  
54  
55  
56  
57  
58  
59  
60

- 1  
2  
3 221.Kuo CM, Tung TH, Wang SH, Chi CC. Efficacy and safety of tofacitinib for moderate-  
4 to-severe plaque psoriasis: a systematic review and meta-analysis of randomized  
5 controlled trials. *J Eur Acad of Dermatol Venereol*. 2018;32(3):355-62.  
6  
7  
8 222.Liu W, Qian X, Ji W, Lu Y, Wei G, Wang Y. Effects and safety of Sinomenine in  
9 treatment of rheumatoid arthritis contrast to methotrexate: a systematic review and Meta-  
10 analysis. *J Tradit Chin Med*. 2016;36(5):564-77.  
11  
12 223.Zheng Y, Gu Q, Chen HW, Peng HM, Jia DY, Zhou Y, et al. Efficacy of amiodarone and  
13 lidocaine for preventing ventricular fibrillation after aortic cross-clamp release in open  
14 heart surgery: a meta-analysis of randomized controlled trials. *J Zhejiang Univ Sci*  
15 *B*.18(12):1113-22.  
16  
17  
18 224.Fregonese F, Ahuja SD, Akkerman OW, Arakaki-Sanchez D, Ayakaka I, Baghaei P, et al.  
19 Comparison of different treatments for isoniazid-resistant tuberculosis: an individual  
20 patient data meta-analysis. *Lancet Respir Med*. 2018;6(4):265-75.  
21  
22 225.Bornstein NM, Guekht A, Vester J, Heiss WD, Gusev E, Hömberg V, et al. Safety and  
23 efficacy of Cerebrolysin in early post-stroke recovery: a meta-analysis of nine  
24 randomized clinical trials. *Neurol Sci*. 2018;39(4):629-40.  
25  
26 226.Chen HJ, Lin C, Lee CH, Chen YH. Efficacy and Safety of Bevacizumab Combined with  
27 Mitomycin C or 5-Fluorouracil in Primary Trabeculectomy: A Meta-Analysis of  
28 Randomized Clinical Trials. *Ophthalmic Res*. 2018;59(3):155-63.  
29  
30 227.Han C, Kuang MJ, Ma JX, Ma XL. The Efficacy of Preoperative Gabapentin in Spinal  
31 Surgery: A Meta-Analysis of Randomized Controlled Trials. *Pain Physician*.  
32 2017;20(7):649-61.  
33  
34 228.Peng K, Zhang J, Meng XW, Liu HY, Ji FH. Optimization of Postoperative Intravenous  
35 Patient-Controlled Analgesia with Opioid-Dexmedetomidine Combinations: An Updated  
36 Meta-Analysis with Trial Sequential Analysis of Randomized Controlled Trials. *Pain*  
37 *Physician*. 2017;20(7):569-96.  
38  
39 229.Feng M, Ding Q, Zhong C, Li J, Wang Q, Yuan Z, et al. Adjunctive therapy with V-5  
40 Immunitor (V5) for the treatment of tuberculosis patients: a meta-analysis. *Pharmazie*.  
41 2016;71(9):499-503.  
42  
43 230.Xu L, Zhang F, Du S, Yu Q, Chen L, Long LH, et al. Inhaled antibiotics in non-cystic  
44 fibrosis bronchiectasis: A meta-analysis. *Pharmazie*. 2016;71(9):491-8.  
45  
46  
47  
48  
49  
50  
51  
52  
53  
54  
55  
56  
57  
58  
59  
60



- 1  
2  
3 231. Palmeirim MS, Hürlimann E, Knopp S, Speich B, Belizario V, Joseph SA, et al. Efficacy  
4 and safety of co-administered ivermectin plus albendazole for treating soil-transmitted  
5 helminths: A systematic review, meta-analysis and individual patient data analysis. *PLoS*  
6 *Negl Trop Dis*. 2018;12(4):e0006458.  
7  
8  
9  
10 232. Furukawa TA, Efthimiou O, Weitz ES, Cipriani A, Keller MB, Kocsis JH, et al.  
11 Cognitive-Behavioral Analysis System of Psychotherapy, Drug, or Their Combination for  
12 Persistent Depressive Disorder: Personalizing the Treatment Choice Using Individual  
13 Participant Data Network Metaregression. *Psychother Psychosom*. 2018;87(3):140-53.  
14  
15 233. Liu X, Zhai T, Ma R, Luo C, Wang H, Liu L. Effects of uric acid-lowering therapy on the  
16 progression of chronic kidney disease: a systematic review and meta-analysis. *Ren Fail*.  
17 2018;40(1):289-97.  
18  
19 234. Miravittles M, Urrutia G, Mathioudakis AG, Ancochea J. Efficacy and safety of  
20 tiotropium and olodaterol in COPD: a systematic review and meta-analysis. *Respir Res*.  
21 2017;18(1):196.  
22  
23 235. Wang G, Zhang X, Zhang HP, Wang L, Kang Y, Barnes PJ, et al. Corticosteroid plus  $\beta$  2-  
24 agonist in a single inhaler as reliever therapy in intermittent and mild asthma: a proof-of-  
25 concept systematic review and meta-analysis. *Respir Res*. 2017;18(1):203.  
26  
27 236. Kawalec P, Holko P, Mofáko P, Pilc A. Comparative effectiveness of abatacept,  
28 apremilast, secukinumab and ustekinumab treatment of psoriatic arthritis: a systematic  
29 review and network meta-analysis. *Rheumatol Int*. 2018;38(2):189-201.  
30  
31 237. Malhotra K, Katsanos AH, Bilal M, Ishfaq MF, Goyal N, Tsiygoulis G. Cerebrovascular  
32 Outcomes With Proton Pump Inhibitors and Thienopyridines: A Systematic Review and  
33 Meta-Analysis. *Stroke*. 2018;49(2):312-8.  
34  
35 238. Zhang R, Lu Q, Wu Y. The Comparison of Midazolam and Propofol in Gastrointestinal  
36 Endoscopy: A Systematic Review and Meta-analysis. *Surg Laparosc Endosc Percutan*  
37 *Tech*. 2018;28(3):153-8.  
38  
39 239. Yamashita Y, Morimoto T, Toyota T, Shiomi H, Makiyama T, Ono K, et al. Asian  
40 patients versus non-Asian patients in the efficacy and safety of direct oral anticoagulants  
41 relative to vitamin K antagonist for venous thromboembolism: A systemic review and  
42 meta-analysis. *Thromb Res*. 2018;166:37-42.  
43  
44  
45  
46  
47  
48  
49  
50  
51  
52  
53  
54  
55  
56  
57  
58  
59  
60

- 1  
2  
3 240.Zhang W, Sun H, Atiquzzaman M, Sou J, Anis AH, Cooper C. Influenza vaccination for  
4 HIV-positive people: Systematic review and network meta-analysis. *Vaccine*.  
5 2018;36(28):4077-86.  
6  
7  
8 241.Chen H, Shen FE, Tan XD, Jiang WB, Gu YH. Efficacy and Safety of Acupuncture for  
9 Essential Hypertension: A Meta-Analysis. *Med Sci Monit*. 2018;24:2946.  
10  
11 242.Arteagoitia I, Andrés CR, Ramos E. Does chlorhexidine reduce bacteremia following  
12 tooth extraction? A systematic review and meta-analysis. *PloS one*.  
13 2018;13(4):e0195592.  
14  
15 243.Feng X, Tian M, Zhang W, Mei H. Gastrointestinal safety of etoricoxib in osteoarthritis  
16 and rheumatoid arthritis: A meta-analysis. *PloS one*. 2018;13(1).  
17  
18 244.Kawakami H, Mihara T, Nakamura N, Ka K, Goto T. Effect of magnesium added to local  
19 anesthetics for caudal anesthesia on postoperative pain in pediatric surgical patients: A  
20 systematic review and meta-analysis with Trial Sequential Analysis. *PloS one*.  
21 2018;13(1):e0190798.  
22  
23 245.Li X, Zhu L, Zhou C, Liu J, Du H, Wang C, et al. Efficacy and tolerability of short-term  
24 duloxetine treatment in adults with generalized anxiety disorder: A meta-analysis. *PloS*  
25 *one*. 2018;13(3):e0194501.  
26  
27 246.Lin YC, Lin JW, Wu MS, Chen KC, Peng CC, Kang YN. Effects of calcium channel  
28 blockers comparing to angiotensin-converting enzyme inhibitors and angiotensin receptor  
29 blockers in patients with hypertension and chronic kidney disease stage 3 to 5 and  
30 dialysis: A systematic review and meta-analysis. *PloS one*. 2017;12(12):e0188975.  
31  
32 247.Ling X, Zhou H, Ni Y, Wu C, Zhang C, Zhu Z. Does dexmedetomidine have an  
33 antiarrhythmic effect on cardiac patients? A meta-analysis of randomized controlled  
34 trials. *PloS one*. 2018;13(3):e0193303.  
35  
36 248.Rohner E, Grabik M, Tonia T, Jüni P, Pötvány F, Pignatti F, et al. Does access to clinical  
37 study reports from the European Medicines Agency reduce reporting biases? A  
38 systematic review and meta-analysis of randomized controlled trials on the effect of  
39 erythropoiesis-stimulating agents in cancer patients. *PloS one*. 2017;12(12):e0189309.  
40  
41 249.Sethi NJ, Nielsen EE, Safi S, Feinberg J, Gluud C, Jakobsen JC. Digoxin for atrial  
42 fibrillation and atrial flutter: A systematic review with meta-analysis and trial sequential  
43 analysis of randomised clinical trials. *PloS one*. 2018;13(3):e0193924.  
44  
45  
46  
47  
48  
49  
50  
51  
52  
53  
54  
55  
56  
57  
58  
59  
60

- 1  
2  
3 250. Wolf S, Hoffmann VS, Habicht A, Kauke T, Bucher J, Schoenberg M, et al. Effects of  
4 mTOR-Is on malignancy and survival following renal transplantation: A systematic  
5 review and meta-analysis of randomized trials with a minimum follow-up of 24 months.  
6  
7 *PloS one*. 2018;13(4):e0194975.  
8  
9  
10  
11  
12  
13  
14  
15  
16  
17  
18  
19  
20  
21  
22  
23  
24  
25  
26  
27  
28  
29  
30  
31  
32  
33  
34  
35  
36  
37  
38  
39  
40  
41  
42  
43  
44  
45  
46  
47  
48  
49  
50  
51  
52  
53  
54  
55  
56  
57  
58  
59  
60

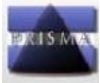

# PRISMA 2009 Checklist

| Section/topic                      | #  | Checklist item                                                                                                                                                                                                                                                                                              | Reported on page # |
|------------------------------------|----|-------------------------------------------------------------------------------------------------------------------------------------------------------------------------------------------------------------------------------------------------------------------------------------------------------------|--------------------|
| <b>TITLE</b>                       |    |                                                                                                                                                                                                                                                                                                             |                    |
| Title                              | 1  | Identify the report as a systematic review, meta-analysis, or both.                                                                                                                                                                                                                                         | N/A                |
| <b>ABSTRACT</b>                    |    |                                                                                                                                                                                                                                                                                                             |                    |
| Structured summary                 | 2  | Provide a structured summary including, as applicable: background; objectives; data sources; study eligibility criteria, participants, and interventions; study appraisal and synthesis methods; results; limitations; conclusions and implications of key findings; systematic review registration number. | 3,4                |
| <b>INTRODUCTION</b>                |    |                                                                                                                                                                                                                                                                                                             |                    |
| Rationale                          | 3  | Describe the rationale for the review in the context of what is already known.                                                                                                                                                                                                                              | 5,6                |
| Objectives                         | 4  | Provide an explicit statement of questions being addressed with reference to participants, interventions, comparisons, outcomes, and study design (PICOS).                                                                                                                                                  | 6                  |
| <b>METHODS</b>                     |    |                                                                                                                                                                                                                                                                                                             |                    |
| Protocol and registration          | 5  | Indicate if a review protocol exists, if and where it can be accessed (e.g., Web address), and, if available, provide registration information including registration number.                                                                                                                               | 6                  |
| Eligibility criteria               | 6  | Specify study characteristics (e.g., PICOS, length of follow-up) and report characteristics (e.g., years considered, language, publication status) used as criteria for eligibility, giving rationale.                                                                                                      | 6,7                |
| Information sources                | 7  | Describe all information sources (e.g., databases with dates of coverage, contact with study authors to identify additional studies) in the search and date last searched.                                                                                                                                  | 7                  |
| Search                             | 8  | Present full electronic search strategy for at least one database, including any limits used, such that it could be repeated.                                                                                                                                                                               | eMethods1          |
| Study selection                    | 9  | State the process for selecting studies (i.e., screening, eligibility, included in systematic review, and, if applicable, included in the meta-analysis).                                                                                                                                                   | 6-8                |
| Data collection process            | 10 | Describe method of data extraction from reports (e.g., piloted forms, independently, in duplicate) and any processes for obtaining and confirming data from investigators.                                                                                                                                  | 8-10               |
| Data items                         | 11 | List and define all variables for which data were sought (e.g., PICOS, funding sources) and any assumptions and simplifications made.                                                                                                                                                                       | 8-12               |
| Risk of bias in individual studies | 12 | Describe methods used for assessing risk of bias of individual studies (including specification of whether this was done at the study or outcome level), and how this information is to be used in any data synthesis.                                                                                      | N/A                |
| Summary measures                   | 13 | State the principal summary measures (e.g., risk ratio, difference in means).                                                                                                                                                                                                                               | 3, 10,11           |
| Synthesis of results               | 14 | Describe the methods of handling data and combining results of studies, if done, including measures of consistency (e.g., $I^2$ ) for each meta-analysis.                                                                                                                                                   | 10,11              |

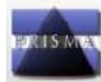

# PRISMA 2009 Checklist

Page 1 of 2

| Section/topic                 | #  | Checklist item                                                                                                                                                                                           | Reported on page #       |
|-------------------------------|----|----------------------------------------------------------------------------------------------------------------------------------------------------------------------------------------------------------|--------------------------|
| Risk of bias across studies   | 15 | Specify any assessment of risk of bias that may affect the cumulative evidence (e.g., publication bias, selective reporting within studies).                                                             | N/A                      |
| Additional analyses           | 16 | Describe methods of additional analyses (e.g., sensitivity or subgroup analyses, meta-regression), if done, indicating which were pre-specified.                                                         | 11                       |
| <b>RESULTS</b>                |    |                                                                                                                                                                                                          |                          |
| Study selection               | 17 | Give numbers of studies screened, assessed for eligibility, and included in the review, with reasons for exclusions at each stage, ideally with a flow diagram.                                          | 12, Figure 1             |
| Study characteristics         | 18 | For each study, present characteristics for which data were extracted (e.g., study size, PICOS, follow-up period) and provide the citations.                                                             | 12, 13, 26, 27 (Table 1) |
| Risk of bias within studies   | 19 | Present data on risk of bias of each study and, if available, any outcome level assessment (see item 12).                                                                                                | N/A                      |
| Results of individual studies | 20 | For all outcomes considered (benefits or harms), present, for each study: (a) simple summary data for each intervention group (b) effect estimates and confidence intervals, ideally with a forest plot. | N/A                      |
| Synthesis of results          | 21 | Present results of each meta-analysis done, including confidence intervals and measures of consistency.                                                                                                  | N/A                      |
| Risk of bias across studies   | 22 | Present results of any assessment of risk of bias across studies (see Item 15).                                                                                                                          | N/A                      |
| Additional analysis           | 23 | Give results of additional analyses, if done (e.g., sensitivity or subgroup analyses, meta-regression [see Item 16]).                                                                                    | 28 (Table 2)             |
| <b>DISCUSSION</b>             |    |                                                                                                                                                                                                          |                          |
| Summary of evidence           | 24 | Summarize the main findings including the strength of evidence for each main outcome; consider their relevance to key groups (e.g., healthcare providers, users, and policy makers).                     | 15-17                    |
| Limitations                   | 25 | Discuss limitations at study and outcome level (e.g., risk of bias), and at review-level (e.g., incomplete retrieval of identified research, reporting bias).                                            | 17                       |
| Conclusions                   | 26 | Provide a general interpretation of the results in the context of other evidence, and implications for future research.                                                                                  | 15-17                    |
| <b>FUNDING</b>                |    |                                                                                                                                                                                                          |                          |
| Funding                       | 27 | Describe sources of funding for the systematic review and other support (e.g., supply of data); role of funders for the systematic review.                                                               | 19                       |

From: Moher D, Liberati A, Tetzlaff J, Altman DG, The PRISMA Group (2009). Preferred Reporting Items for Systematic Reviews and Meta-Analyses: The PRISMA Statement. PLoS Med 6(6): e1000097. doi:10.1371/journal.pmed1000097

For peer review only - <http://bmjopen.bmj.com/site/about/guidelines.xhtml>

For more information, visit: [www.prisma-statement.org](http://www.prisma-statement.org)

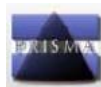

# PRISMA 2009 Checklist

For peer review only

- 1
- 2
- 3
- 4
- 5
- 6
- 7
- 8
- 9
- 10
- 11
- 12
- 13
- 14
- 15
- 16
- 17
- 18
- 19
- 20
- 21
- 22
- 23
- 24
- 25
- 26
- 27
- 28
- 29
- 30
- 31
- 32
- 33
- 34
- 35
- 36
- 37
- 38
- 39
- 40
- 41
- 42
- 43
- 44
- 45
- 46
- 47

# BMJ Open

## Reporting of Drug Trial Funding Sources and Author Financial Conflicts of Interest in Cochrane and non-Cochrane Meta-analyses: A Cross-sectional Study

|                                 |                                                                                                                                                                                                                                                                                                                                                                                                                                                                                                                                                                                                                                                                                                                                                                                                        |
|---------------------------------|--------------------------------------------------------------------------------------------------------------------------------------------------------------------------------------------------------------------------------------------------------------------------------------------------------------------------------------------------------------------------------------------------------------------------------------------------------------------------------------------------------------------------------------------------------------------------------------------------------------------------------------------------------------------------------------------------------------------------------------------------------------------------------------------------------|
| Journal:                        | <i>BMJ Open</i>                                                                                                                                                                                                                                                                                                                                                                                                                                                                                                                                                                                                                                                                                                                                                                                        |
| Manuscript ID                   | bmjopen-2019-035633.R1                                                                                                                                                                                                                                                                                                                                                                                                                                                                                                                                                                                                                                                                                                                                                                                 |
| Article Type:                   | Original research                                                                                                                                                                                                                                                                                                                                                                                                                                                                                                                                                                                                                                                                                                                                                                                      |
| Date Submitted by the Author:   | 07-Feb-2020                                                                                                                                                                                                                                                                                                                                                                                                                                                                                                                                                                                                                                                                                                                                                                                            |
| Complete List of Authors:       | Turner, Kimberly; Jewish General Hospital and McGill University<br>Carboni-Jiménez, Andrea; McGill University<br>Benea, Carla; Jewish General Hospital<br>Elder, Katharine; Jewish General Hospital<br>Levis, Brooke; McGill University, Epidemiology, Biostatistics and Occupational Health<br>Boruff, Jill; McGill University, Schulich Library of Physical Sciences, Life Sciences, and Engineering<br>Roseman, Michelle; McGill University<br>Bero, Lisa; University of Sydney, Charles Perkins Centre / Pharmacy<br>Lexchin, Joel; York University, School of Health Policy and Management<br>Turner, Erick; Portland VA Medical Center, ; Oregon Health & Science University, Psychiatry<br>Benedetti, Andrea; McGill University<br>Thombs, Brett; Jewish General Hospital and McGill University |
| <b>Primary Subject Heading</b>: | Research methods                                                                                                                                                                                                                                                                                                                                                                                                                                                                                                                                                                                                                                                                                                                                                                                       |
| Secondary Subject Heading:      | Epidemiology                                                                                                                                                                                                                                                                                                                                                                                                                                                                                                                                                                                                                                                                                                                                                                                           |
| Keywords:                       | EPIDEMIOLOGY, STATISTICS & RESEARCH METHODS, MEDICAL ETHICS                                                                                                                                                                                                                                                                                                                                                                                                                                                                                                                                                                                                                                                                                                                                            |
|                                 |                                                                                                                                                                                                                                                                                                                                                                                                                                                                                                                                                                                                                                                                                                                                                                                                        |

SCHOLARONE™  
Manuscripts

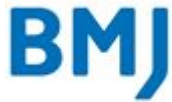

I, the Submitting Author has the right to grant and does grant on behalf of all authors of the Work (as defined in the below author licence), an exclusive licence and/or a non-exclusive licence for contributions from authors who are: i) UK Crown employees; ii) where BMJ has agreed a CC-BY licence shall apply, and/or iii) in accordance with the terms applicable for US Federal Government officers or employees acting as part of their official duties; on a worldwide, perpetual, irrevocable, royalty-free basis to BMJ Publishing Group Ltd ("BMJ") its licensees and where the relevant Journal is co-owned by BMJ to the co-owners of the Journal, to publish the Work in this journal and any other BMJ products and to exploit all rights, as set out in our [licence](#).

The Submitting Author accepts and understands that any supply made under these terms is made by BMJ to the Submitting Author unless you are acting as an employee on behalf of your employer or a postgraduate student of an affiliated institution which is paying any applicable article publishing charge ("APC") for Open Access articles. Where the Submitting Author wishes to make the Work available on an Open Access basis (and intends to pay the relevant APC), the terms of reuse of such Open Access shall be governed by a Creative Commons licence – details of these licences and which [Creative Commons](#) licence will apply to this Work are set out in our licence referred to above.

Other than as permitted in any relevant BMJ Author's Self Archiving Policies, I confirm this Work has not been accepted for publication elsewhere, is not being considered for publication elsewhere and does not duplicate material already published. I confirm all authors consent to publication of this Work and authorise the granting of this licence.



1  
2  
3 **1 Reporting of Drug Trial Funding Sources and Author Financial Conflicts of Interest in**  
4  
5 **2 Cochrane and non-Cochrane Meta-analyses: A Cross-sectional Study**  
6  
7

8 3  
9  
10 4 Kimberly A Turner, Andrea Carboni-Jiménez, Carla Benea, Katharine Elder, Brooke Levis,  
11  
12  
13 5 Jill Boruff, Michelle Roseman, Lisa A Bero, Joel Lexchin, Erick H Turner, Andrea Benedetti,  
14  
15  
16 6 Brett D Thombs  
17

18  
19  
20  
21 **8 Affiliations:**  
22

23 9 Lady Davis Institute for Medical Research, Jewish General Hospital and McGill University,  
24  
25  
26 10 Montreal, Quebec, Canada  
27

28 11 Kimberly A Turner (masters student)  
29

30 12 Andrea Carboni-Jiménez (research assistant)  
31

32 13 Carla Benea (undergraduate student)  
33  
34

35 14 Katharine Elder (research assistant)  
36

37 15 Brooke Levis (doctoral student)  
38

39 16 Brett D Thombs (professor)  
40  
41

42 17  
43  
44 18 Schulich Library of Physical Sciences, Life Sciences, and Engineering, McGill University,  
45  
46  
47 19 Montreal, Quebec, Canada  
48

49 20 Jill Boruff (associate librarian)  
50

51 21  
52  
53  
54 22 Kingsway Medical Centre Family Health Organization, Toronto, Ontario, Canada  
55  
56

1  
2  
3 23 Michelle Roseman (family physician)  
4  
5

6 24  
7

8 25 Charles Perkins Centre, and Faculty of Medicine and Health, and School of Pharmacy, The  
9

10  
11 26 University of Sydney, Sydney, Australia  
12

13 27 Lisa A Bero (professor)  
14

15 28  
16

17 29 School of Health Policy and Management, Faculty of Health, York University, Toronto, Ontario,  
18

19  
20 30 Canada  
21

22 31 Joel Lexchin (professor emeritus)  
23

24 32  
25

26  
27 33 Department of Psychiatry and Department of Pharmacology, Oregon Health and Science  
28

29 34 University, Portland, Oregon, USA  
30

31 35 Erick H Turner (associate professor)  
32

33 36  
34

35  
36 37 Department of Epidemiology, Biostatistics and Occupational Health, McGill University,  
37

38 38 Montreal, Quebec, Canada  
39

40  
41 39 Andrea Benedetti (associate professor)  
42

43 40  
44

45 41 **Correspondence to:** Brett D. Thombs, PhD; Jewish General Hospital; 4333 Cote Ste. Catherine  
46

47 42 Road; Montreal, Quebec, Canada H3T 1E4; Tel (514) 340-8222 ext. 25112; E-mail:  
48

49  
50 43 brett.thombs@mcgill.ca; ORCID: 0000-0002-5644-8432  
51

52 44  
53

54 45 **Word count:** 4,277  
55

1  
2  
3 46 **ABSTRACT**  
4

5 47 **Objective:** To (1) investigate the extent to which recently published meta-analyses report trial  
6  
7 48 funding, author-industry financial ties, and author-industry employment from included RCTs,  
8  
9 49 comparing Cochrane and non-Cochrane meta-analyses; (2) examine characteristics of meta-  
10  
11 50 analyses independently associated with reporting funding sources of included RCTs; and (3)  
12  
13 51 compare reporting among recently published Cochrane meta-analyses to Cochrane reviews  
14  
15 52 published in 2010.

16  
17 53 **Design:** Review of consecutive sample of recently published meta-analyses.  
18

19  
20 54 **Data sources:** MEDLINE database via PubMed searched on October 19, 2018.  
21

22  
23 55 **Eligibility criteria for selecting articles:** We selected the 250 most recent meta-analyses listed  
24  
25 56 in PubMed that included a documented search of at least one database, statistically combined  
26  
27 57 results from  $\geq 2$  RCTs, and evaluated the effects of a drug or class of drugs.  
28

29  
30 58 **Results:** 90 of 107 (84%) Cochrane meta-analyses reported funding sources for some or all  
31  
32 59 included trials compared with 21 of 143 (15%) non-Cochrane meta-analyses, a difference of 69%  
33  
34 60 (95% confidence interval [CI], 59% to 77%). Percent reporting was also higher for Cochrane  
35  
36 61 meta-analyses compared with non-Cochrane meta-analyses for trial author-industry financial ties  
37  
38 62 (44% versus 1%; 95% CI for difference, 33% to 52%) and employment (17% versus 1%; 95%  
39  
40 63 CI for difference, 9% to 24%). In multivariable analysis, compared with Cochrane meta-  
41  
42 64 analyses, the odds ratio for reporting trial funding was  $\leq 0.11$  for all other journal category and  
43  
44 65 impact factor combinations. Compared with Cochrane reviews from 2010, reporting of funding  
45  
46 66 sources of included RCTs among recently published Cochrane meta-analyses improved by 54%  
47  
48 67 (95% CI, 42% to 63%), and reporting of trial author-industry financial ties and employment  
49  
50 68 improved by 37% (95% CI, 26% to 47%) and 10% (95% CI, 2% to 19%).  
51  
52  
53  
54  
55  
56  
57  
58  
59  
60

1  
2  
3  
4  
5  
6  
7  
8  
9  
10  
11  
12  
13  
14  
15  
16  
17  
18  
19  
20  
21  
22  
23  
24  
25  
26  
27  
28  
29  
30  
31  
32  
33  
34  
35  
36  
37  
38  
39  
40  
41  
42  
43  
44  
45  
46  
47  
48  
49  
50  
51  
52  
53  
54  
55  
56  
57  
58  
59  
60

69 **Conclusions:** Reporting of trial funding sources, trial author-industry financial ties, and trial  
70 author-industry employment in Cochrane meta-analyses has improved since 2010 and is higher  
71 than in non-Cochrane meta-analyses.

For peer review only

1  
2  
3 72 **Strengths and limitations of this study**  
4

- 5 73       • The meta-analyses selected for inclusion in our study was a consecutive sample of  
6  
7  
8 74       meta-analyses of drug interventions published in 2016-2018.  
9  
10 75       • We compared reporting of funding and financial conflicts of interest among trials  
11  
12 76       included in recent Cochrane and non-Cochrane meta-analyses.  
13  
14  
15 77       • We compared reporting of funding and financial conflicts of interest among trials  
16  
17 78       included in recent Cochrane meta-analyses with Cochrane systematic reviews  
18  
19 79       from 2010.  
20  
21  
22 80       • We were unable to examine whether meta-analyses published in different types of  
23  
24 81       journals or journals with different impact factors are more or less likely to report  
25  
26 82       on financial conflicts of interest from included trials because most meta-analyses  
27  
28 83       of drug trials are published as Cochrane reviews or in relatively low-impact  
29  
30 84       specialty medicine journals.  
31  
32  
33 85       • Our study examined only disclosed financial conflicts of interest and did not  
34  
35 86       attempt to identify non-disclosed conflicts.  
36  
37  
38  
39  
40  
41  
42  
43  
44  
45  
46  
47  
48  
49  
50  
51  
52  
53  
54  
55  
56  
57  
58  
59  
60

## 87 INTRODUCTION

88 Financial conflicts of interest (FCOIs) can introduce bias in drug trials by influencing  
89 how a trial is designed, inclusion and exclusion criteria, choice of drug dosages and comparators,  
90 selection of trial outcomes, how analyses are conducted, interpretation of findings, which  
91 outcomes are reported, and whether trial results are published.<sup>1-10</sup> Drug trials funded by industry  
92 are approximately 30% more likely to report favourable efficacy findings than non-industry  
93 trials,<sup>8</sup> and drug trials with principal investigators with FCOIs have higher odds of reporting  
94 favourable outcomes than those led by principal investigators without FCOIs, even after  
95 controlling for trial funding sources.<sup>7</sup>

96 Previous studies that have examined meta-analyses of drug trials published in high-  
97 impact journals and Cochrane systematic reviews of drug trials have found that funding sources  
98 and author FCOIs of included randomized controlled trials (RCTs) were rarely reported.<sup>11, 12</sup> A  
99 2011 study found that only 2 of a sample of 29 (7%) meta-analyses on the effects of drug  
100 interventions published in high-impact journals in 2009 reported the funding sources of included  
101 drug trials and that none reported trial author-industry financial ties or author-industry  
102 employment.<sup>11</sup> A second study, published in 2012, examined Cochrane systematic reviews of  
103 drug trials and found that only 46 of 151 (30%) eligible reviews published in 2010 reported  
104 information on the funding source of some or all included trials, 11 (7%) provided any  
105 information on author-industry financial ties, and 10 (7%) provided any information on author-  
106 industry employment from included trials.<sup>12</sup>

107 In 2012, the Cochrane Collaboration began to require that Cochrane reviews report trial  
108 funding sources and FCOIs of the primary researchers of all included trials in the characteristics  
109 of included studies table (Methodological Expectations of Cochrane Intervention Reviews

1  
2  
3 110 (MECIR), standards R69 and R70).<sup>13, 14</sup> The Preferred Reporting Items for Systematic Reviews  
4  
5 111 and Meta-analyses (PRISMA) statement, however, has not been updated since its publication in  
6  
7 112 2009<sup>15, 16</sup> and does not address the reporting of trial funding or author FCOIs of trials included in  
8  
9 113 systematic reviews and meta-analyses.

10  
11  
12 114 We do not know of any studies that have compared reporting among Cochrane meta-  
13  
14 115 analyses with meta-analyses published in other journals or examined whether reporting in  
15  
16 116 Cochrane reviews has improved since Cochrane implemented its reporting policy. The objectives  
17  
18 117 of the present study were to (1) investigate the extent to which Cochrane and non-Cochrane  
19  
20 118 meta-analyses of drug trials report trial funding sources, author-industry financial ties, and  
21  
22 119 author-industry employment; (2) examine characteristics of meta-analyses that are independently  
23  
24 120 associated with reporting funding sources of included RCTs; and (3) compare reporting among  
25  
26 121 recently published Cochrane meta-analyses to reporting from Cochrane systematic reviews  
27  
28 122 published in 2010,<sup>11</sup> prior to implementation of Cochrane's reporting policy.

## 32 123 **METHODS**

33  
34  
35 124 The methods for the present study were based on our previous study of reporting of  
36  
37 125 funding sources, author-industry financial ties, and author-industry employment from trials  
38  
39 126 included in Cochrane systematic reviews published in 2010; however in the present study, we  
40  
41 127 included only Cochrane reviews that contained a meta-analysis, whereas in the previous study all  
42  
43 128 Cochrane reviews that included results from at least one RCT were eligible.<sup>12</sup> Because of this  
44  
45 129 difference, in our comparison, in addition to main analyses, we conducted sensitivity analyses  
46  
47 130 that only included systematic reviews with meta-analyses from the previous study. A study  
48  
49 131 protocol was developed prior to initiating the present study and was posted on the Open Science  
50  
51 132 Framework (<https://osf.io/njk5w/>).

### 133 **Selection of meta-analyses**

134           Meta-analyses in any language were eligible if they (1) included a documented search for  
135 eligible RCTs using at least one database, (2) statistically combined results from  $\geq 2$  RCTs, and  
136 (3) evaluated the efficacy/effectiveness or harm of a drug or class of drugs against an alternative  
137 treatment (e.g., placebo, alternative drug, non-pharmacological treatment) or no treatment. Meta-  
138 analyses that only assessed different methods of administration, dosages, or dosage schedules of  
139 the same drug were excluded. Drugs were defined broadly to include biologics and vaccines, but  
140 not nutritional supplements or medical devices without a drug component. Meta-analyses that  
141 investigated a combination of pharmacological and non-pharmacological interventions or  
142 interventions which may or may not involve a drug (e.g., amnioinfusion) were included if a study  
143 group was exclusively given a drug intervention or if the meta-analysis assessed the addition of a  
144 drug to a treatment received by both intervention and control groups. Interventions were  
145 classified as having a drug component if any form of the active ingredient (e.g., dosage, route,  
146 strength, compound) was listed as an approved or discontinued brand name, generic drug or  
147 therapeutic biological product by the US Food and Drug Administration (FDA) as listed in the  
148 Drugs@FDA database at the time of review.<sup>17</sup> If an agent was not listed in the Drugs@FDA  
149 database and was classified by the FDA as a non-drug (e.g., food additive, supplement), then it  
150 was not considered a drug. If an agent was not regulated as a drug and was not listed as a non-  
151 drug by the FDA, drug status was determined based on consensus among investigators using  
152 publicly available sources that provided information on the agent.

153           We searched the MEDLINE database via PubMed on October 19, 2018 using a search  
154 developed by a medical librarian (see eMethods1 for strategy). Citations were uploaded into the  
155 systematic review software DistillerSR (Evidence Partners, Ottawa, Canada), which was used to



1  
2  
3 156 code and track results. Two investigators independently evaluated titles and abstracts for  
4  
5 157 potential eligibility. Full texts of titles and abstracts deemed potentially eligible by either  
6  
7 158 investigator were then reviewed by two investigators independently. Disagreements at the full-  
8  
9 159 text level were resolved through consensus with a third investigator consulted as necessary.  
10  
11 160 Because we sought to include the most recently published meta-analyses that met eligibility  
12  
13 161 criteria, prior to reviewing, citations were organized by PubMed reference identification numbers  
14  
15 162 with the most recent first. Title and abstract and full-text reviews were conducted sequentially  
16  
17 163 until we obtained our desired number of included meta-analyses based on our power analysis.  
18  
19  
20  
21

#### 22 164 **Data extraction**

23  
24 165 For each eligible meta-analysis, one reviewer initially extracted all data into a pre-defined  
25  
26 166 form in DistillerSR, and a second reviewer validated all extracted data using the DistillerSR  
27  
28 167 Quality Control function. Discrepancies were resolved by consensus and consultation with a  
29  
30 168 third investigator, if needed. For each included meta-analysis, reviewers extracted first author  
31  
32 169 last name; year of publication; journal name; Clarivate Analytics 2017 journal impact factor;  
33  
34 170 journal speciality area based on Clarivate Analytics classification; whether it was a Cochrane  
35  
36 171 meta-analysis published in the Cochrane Database of Systematic Reviews or elsewhere; funding  
37  
38 172 source for the meta-analysis and author-industry financial ties and employment; reporting in the  
39  
40 173 meta-analysis of trial funding sources, trial author-industry financial ties, and trial author-  
41  
42 174 industry employment; and whether the meta-analysis referenced a published protocol or  
43  
44 175 contained a PROSPERO registration number. If a registration number was not provided, we  
45  
46 176 searched the PROSPERO website (<https://www.crd.york.ac.uk/PROSPERO/>) using key terms  
47  
48 177 from the published article, then attempted to match the principal investigator, funding source,  
49  
50  
51  
52  
53  
54  
55  
56  
57  
58  
59  
60

1  
2  
3 178 intervention, non-intervention comparator group, and design from the article to registrations  
4  
5 179 obtained in the search.

6  
7  
8 180 To extract information on meta-analysis funding source, meta-analysis author-industry  
9  
10 181 financial ties, and meta-analysis author-industry employment and to determine whether or not  
11  
12 182 trial funding sources, trial author-industry financial ties, and trial author-industry employment  
13  
14 183 were reported in the meta-analysis, for each included meta-analysis, reviewers examined all text,  
15  
16 184 tables, figures, appendices, disclosure statements, acknowledgements and any online  
17  
18 185 supplemental material, published with the manuscript or linked to the manuscript. Funding  
19  
20 186 sources for meta-analyses were classified as (1) non-industry (e.g., public granting agency,  
21  
22 187 private not-for-profit granting agency), (2) pharmaceutical industry, (3) combined  
23  
24 188 pharmaceutical industry and non-industry, (4) no funding or (5) not reported. Financial ties of  
25  
26 189 meta-analysis authors to industry were defined per the International Committee of Medical  
27  
28 190 Journal Editors Uniform Disclosure Form for Potential Conflicts of Interest<sup>18</sup> and included  
29  
30 191 current or former board membership, current or former consultancy, current or former industry  
31  
32 192 employment, expert testimony, industry grants (issued or pending), payment for lectures  
33  
34 193 including service on speakers bureaus, payment for manuscript preparation, patents (planned,  
35  
36 194 pending, or issued), royalties, payment for development of educational presentations, stock or  
37  
38 195 stock options, travel reimbursement, or other relationships with industry, as disclosed in the  
39  
40 196 review. Of these, we specifically coded if industry employees were part of the author group. If a  
41  
42 197 meta-analysis did not contain a disclosure statement, meta-analysis author-industry financial ties  
43  
44 198 were coded as not reported.

45  
46 199 For reporting of (1) trial funding sources, (2) trial author-industry financial ties, and (3)  
47  
48 200 trial author-industry employment, meta-analyses were coded as (1) reporting for all included  
49  
50

1  
2  
3 201 trials; (2) reporting for some, but not all, included trials (partial reporting); or (3) not reporting.  
4  
5 202 Meta-analyses that included data from a pharmaceutical industry database or noted that trial  
6  
7 203 drugs were supplied by the manufacturers for certain trials, but that did not make any explicit  
8  
9 204 statement of trial funding sources, were coded as not reporting. For meta-analyses that reported  
10  
11 205 information on funding sources or author FCOIs from included trials, either fully or partially, we  
12  
13 206 recorded where in the meta-analysis the information was reported. Specifically, we recorded  
14  
15 207 whether the information was reported in the abstract, lay summary, risk of bias material (text,  
16  
17 208 figure or table, both), main text other than risk of bias, elsewhere in the main document (e.g.,  
18  
19 209 characteristics of included studies table, other table, footnote of a table), or in an online  
20  
21 210 appendix. See eMethods2.

## 211 **Power analysis**

212 To determine the number of meta-analyses to target, we first calculated the number of  
213 included meta-analyses that would be needed for 80% power to find a statistically significant  
214 difference if there were a 20% difference in reporting trial funding sources based on meta-  
215 analysis characteristics, with  $\alpha = 0.05$ . We varied the rates of reporting from 10% versus 30% to  
216 70% versus 90% and considered scenarios where the proportion of reporting meta-analyses with  
217 each characteristic (e.g., high-impact journals versus low-impact journals) was 50% versus 50%  
218 and 30% versus 70%. For a two-tailed binomial test with  $\alpha = 0.05$ , the maximum number of  
219 included meta-analyses needed in any scenario was 239. Because the consequence of  
220 overpowering the study was additional labour and not risk to human participants, we rounded  
221 this number up to 250 meta-analyses. See eMethods3.

## 222 **Statistical analyses**

223 We presented characteristics of included meta-analyses descriptively, including funding  
224 sources and FCOIs. We determined the proportion of meta-analyses that reported trial funding  
225 source, author-industry financial ties, and author-industry employment of included trials for (1)  
226 all included trials, (2) some, but not all, included trials, and (3) no included trials, along with  
227 95% confidence intervals (CIs). We compared the difference between the proportion of recently  
228 published Cochrane meta-analyses that reported study funding, author-industry financial ties, and  
229 author-industry employment from included RCTs with recently published non-Cochrane meta-  
230 analyses and with Cochrane systematic reviews published in 2010. Because the present study  
231 included meta-analyses only, but the previous study of Cochrane reviews included systematic  
232 reviews with or without meta-analyses,<sup>12</sup> we conducted a sensitivity analysis in which we  
233 excluded Cochrane systematic reviews from 2010 that did not include a meta-analysis and would  
234 not have been eligible for inclusion in the present study. We calculated 95% CIs for all  
235 differences.<sup>19</sup>

236 To assess the relationship between meta-analysis characteristics and reporting of funding  
237 sources for some or all included trials, versus not reporting, we fit unadjusted (bivariate) and  
238 adjusted (multivariate) logistic regression models with all predictors using the glm function in R  
239 (R version 3.2.3; RStudio Version 1.0.136).<sup>20, 21</sup> The predictor variables that were considered in  
240 bivariate and adjusted analyses were: (1) combined category (Cochrane, specialty medicine,  
241 general medicine, multidisciplinary) and impact factor of the journal in which the meta-analysis  
242 was published; and (2) whether there was industry funding for the meta-analysis or any FCOI  
243 disclosed by meta-analysis authors. We combined journal category and impact factor because of  
244 the small number of journals in some categories and the small number of journals with impact  
245 factor greater than that of Cochrane. Thus, meta-analyses were categorized as (1) low-impact ( $\leq$

1  
2  
3 246 3.0) specialty medicine journals, (2) low-impact ( $\leq 3.0$ ) general medicine or multidisciplinary  
4  
5 247 journals, (3) medium-impact (3.1 - 6.7) specialty medicine journals, (4) high-impact ( $> 6.8$ )  
6  
7 248 specialty medicine or general medicine journals, and (5) Cochrane meta-analyses (impact factor  
8  
9 249 = 6.8; reference category). Because 28 of 33 meta-analyses in general medicine journals were  
10  
11 250 from a single journal (*Medicine*) and not necessarily representative of general medicine as a  
12  
13 251 category, and because 9 of the 10 meta-analyses published in multidisciplinary science journals  
14  
15 252 were published in a single journal (*PLOS ONE*), we combined general medicine and  
16  
17 253 multidisciplinary journals.

18  
19 254 Our initial protocol indicated that, if possible, we would include in the logistic regression  
20  
21 255 model the year of publication of the meta-analysis and whether there was meta-analysis funding  
22  
23 256 by industry, meta-analysis author-industry financial ties, and meta-analysis author-industry  
24  
25 257 employment, separately. However, 246 of 250 included meta-analyses were published in 2017-  
26  
27 258 2018, and only 3 meta-analyses had industry funding; thus, we did not include year of  
28  
29 259 publication, and we grouped meta-analysis funding source and author FCOIs into a single  
30  
31 260 variable (No FCOIs including funding source versus any FCOI). Additionally, we only  
32  
33 261 conducted a multivariable analysis for the reporting of funding sources of included RCTs and not  
34  
35 262 for reporting of author-industry financial ties and author-industry employment, because there  
36  
37 263 were not enough examples of meta-analyses that reported author-industry financial ties and  
38  
39 264 author-industry employment.

## 265 **Patient and Public Involvement**

266 Patients and members of the public were not involved in the design, conduct,  
267 reporting, or plan for dissemination of our research.

## 268 **RESULTS**

## 269 Selection of eligible meta-analyses

270 Our initial search of PubMed without date restrictions retrieved 9,725 unique citations.  
271 To select 250 eligible meta-analyses, working backwards from the most recent, a total of 401  
272 citations were screened for eligibility; 64 were excluded at the title and abstract level and 76 at  
273 the full-text level. See Figure 1.

274 As shown in Table 1, of the 250 included meta-analyses, 107 (43%) were Cochrane  
275 reviews, all of which were published in the Cochrane Database of Systematic Reviews. Among  
276 the 143 non-Cochrane meta-analyses, 33 (23%) were published in general medicine journals  
277 (including 28 in the journal *Medicine*), 100 (70%) in specialty medicine journals, and 10 (7%) in  
278 multidisciplinary journals (including 9 in *PLOS ONE*). The mean number of included RCTs for  
279 both Cochrane and non-Cochrane meta-analyses was approximately 20. Among the 143 non-  
280 Cochrane meta-analyses, 25 (17%) referenced a published protocol or were registered in  
281 PROSPERO, and 106 (74%) were published in a journal with impact factor  $\leq 3$ .

282 Of the 250 meta-analyses, 3 (1%) reported being funded by industry, 148 (59%) reported  
283 funding from non-industry sources, 56 (22%) reported no funding, and 43 (17%) did not report  
284 funding source; 3 (1%) had at least 1 author who reported current industry employment, 51  
285 (20%) had at least 1 author that reported other financial ties with industry, 187 (75%) reported  
286 that there were no authors with FCOIs, and 12 (5%) did not report any information about author  
287 FCOIs. Characteristics of each of the 250 included meta-analyses are shown in eTable 1.

## 288 Reporting in meta-analyses of funding sources and author FCOIs from included drug trials

289 As shown in Table 2, 111 of the 250 (44%) included meta-analyses reported the funding  
290 sources for some or all included trials, 49 (20%) reported author-industry financial ties for some  
291 or all included trials, and 19 (8%) reported author-industry employment for some or all included

1  
2  
3 292 trials. Of the 107 Cochrane meta-analyses, 90 (84%) reported funding sources for some or all  
4  
5 293 included trials compared with 21 of 143 (15%) non-Cochrane meta-analyses, a difference of 69%  
6  
7  
8 294 (95% CI, 59% to 77%); 47 (44%) Cochrane meta-analyses reported author-industry financial ties  
9  
10 295 for some or all included trials compared with 2 (1%) non-Cochrane meta-analyses, a difference  
11  
12 296 of 43% (95% CI, 33% to 52%); 18 (17%) Cochrane meta-analyses reported, fully or partially  
13  
14 297 (for some but not all trials), author-industry employment compared with 1 (1%) non-Cochrane  
15  
16 298 meta-analysis, a difference of 16% (95% CI, 9% to 24%).

19 299 Among the 90 Cochrane meta-analyses that reported funding sources for some or all  
20  
21 300 included trials, 77 (86%) provided this information in the characteristics of included studies  
22  
23 301 table, including 23 (26%) that also included it in the assessment of risk of bias of included trials;  
24  
25 302 7 (8%) included it in the risk of bias assessment and at least one other place, but not the  
26  
27 303 characteristics of included studies table, and 6 (7%) reported only as part of the risk of bias  
28  
29 304 assessment. In total, 36 (40%) reported in the context of the risk of bias assessment. See eTable2  
30  
31 305 for reporting for all 250 included meta-analyses.

### 306 **Factors associated with reporting FCOIs from included trials in multivariable analysis**

37 307 As shown in Table 3, the odds ratio for reporting funding sources for some or all included  
38  
39 308 RCTs among non-Cochrane meta-analyses was  $\leq 0.11$  compared with Cochrane meta-analyses  
40  
41 309 for all journal category and impact factor combinations. Meta-analyses with any declared FCOI  
42  
43 310 (OR 1.29, 95% CI 0.53 to 3.19) and meta-analyses for which the presence of FCOIs was not  
44  
45 311 reported (OR 1.18, 95% CI 0.40 to 3.44) did not differ significantly in reporting compared with  
46  
47 312 those with no declared FCOIs.

### 313 **Comparison of recent Cochrane meta-analyses versus Cochrane reviews published in 2010**

1  
2  
3 314 Reporting of funding sources for some or all included trials improved from 30% in  
4  
5 315 Cochrane reviews of drug trials published in 2010 to 84% in recently published Cochrane meta-  
6  
7 316 analyses, an improvement of 54% (95% CI, 42% to 63%). Reporting of author-industry financial  
8  
9 317 ties for some or all included trials improved from 7% in 2010 to 44% in recent meta-analyses, a  
10  
11 318 37% change (95% CI, 26% to 47%). Reporting of author-industry employment for some or all  
12  
13 319 included trials improved from 7% in 2010 to 17% in recent meta-analyses (10%; 95% CI, 2% to  
14  
15 320 19%). Results did not change when the comparison was restricted to Cochrane reviews published  
16  
17 321 in 2010 that included a meta-analysis. See Table 2. Figure 2 summarizes reporting among  
18  
19 322 recently published Cochrane and non-Cochrane meta-analyses and Cochrane reviews from 2010.  
20  
21  
22  
23

## 24 323 **DISCUSSION**

### 25 26 324 **Principal findings**

27  
28 325 We reviewed the 250 most recent meta-analyses of drug treatments listed in PubMed at  
29  
30 326 the time of our search. Of these, 107 (43%) were Cochrane reviews, 100 (40%) were published  
31  
32 327 in specialty medicine journals, and 43 (17%) were published in general medicine or  
33  
34 328 multidisciplinary journals, including 28 in *Medicine* and 9 in *PLOS ONE*. Of the 143 non-  
35  
36 329 Cochrane meta-analyses, 106 (74%) were published in journals with impact factor  $\leq 3$ .

37  
38 330 Among Cochrane meta-analyses, 84% reported funding sources for some or all included  
39  
40 331 RCTs compared with 15% of non-Cochrane meta-analyses. Cochrane meta-analyses were also  
41  
42 332 more likely than non-Cochrane meta-analyses to report author-industry financial ties (44%  
43  
44 333 versus 1%) and author-industry employment (17% versus 1%).

45  
46 334 In 2010, only 30% of 151 Cochrane systematic reviews of drug treatments reported trial  
47  
48 335 funding sources.<sup>12</sup> This improved to 84% among recent Cochrane meta-analyses. Cochrane  
49  
50 336 reviews also improved reporting of author-industry financial ties and author-industry  
51  
52  
53  
54  
55  
56  
57  
58  
59  
60



1  
2  
3 337 employment of included RCTs from 7% to 44% and from 7% to 17%. It is possible that the  
4  
5 338 reason that few meta-analyses reported author-industry employment is because some may have  
6  
7 339 assumed that author-industry employment would be considered a type of author-industry  
8  
9 340 financial tie and did not report employment separately, whereas we considered author-industry  
10  
11 341 financial ties and employment separately.

12  
13  
14 342 Among the 90 Cochrane meta-analyses that reported funding sources of included trials in  
15  
16 343 the present study, 86% included the information in the characteristics of included studies table,  
17  
18 344 as required by Cochrane, and 40% included the information in the risk of bias assessment.

### 21 345 **Findings in context**

22  
23  
24 346 In 2012, soon after our previous results showed that few Cochrane systematic reviews of  
25  
26 347 drug trials reported funding sources and author FCOIs of included trials,<sup>12</sup> the Cochrane  
27  
28 348 Collaboration began to require that trial funding sources and FCOIs be reported for every  
29  
30 349 included RCT in the characteristics of included studies table.<sup>13, 14</sup> Reporting of trial funding  
31  
32 350 sources among recent Cochrane meta-analyses has not reached 100%, and work is needed to  
33  
34 351 improve the reporting of other types of author FCOIs, which was under 50% despite being  
35  
36 352 required by Cochrane. Nonetheless, the improvements documented in the present study are  
37  
38 353 substantial, both compared with previous Cochrane reviews and with contemporary non-  
39  
40 354 Cochrane meta-analyses. Cochrane is a global organization consisting of a large number of  
41  
42 355 different review and methods groups that span numerous fields of health research. This diversity  
43  
44 356 suggests that changes that have occurred likely resulted from change in the mandatory reporting  
45  
46 357 requirements for Cochrane reviews and widespread adoption by the organization. We did not  
47  
48 358 examine whether performance differed by review groups or whether updated reviews based on  
49  
50 359 initial protocols that pre-dated Cochrane's reporting policy may have been less likely to fully  
51  
52  
53  
54  
55  
56  
57  
58  
59  
60

1  
2  
3 360 report. It is possible that reporting in Cochrane reviews could be improved even further by  
4  
5 361 ensuring that all review groups are fully compliant and that even reviews with older initial  
6  
7 362 protocols report per Cochrane's current MECIR standards, as required by Cochrane.<sup>14</sup>  
8  
9

10 363 The improved performance in reporting in Cochrane reviews suggests the possibility that  
11  
12 364 other journals could improve the transparency of reporting of trial funding and trial author FCOI  
13  
14 365 in evidence syntheses by adopting similar reporting requirements. Most journals that specify  
15  
16 366 reporting requirements stipulate that authors follow reporting standards for meta-  
17  
18 367 analyses articulated in the PRISMA statement. The current version of the PRISMA  
19  
20 368 statement does not address reporting of trial funding sources and FCOIs of trial authors by  
21  
22 369 investigators who publish systematic reviews and meta-analyses.<sup>16, 17</sup> The forthcoming updated  
23  
24 370 PRISMA statement, however, will require that trial funding, although not trial author FCOIs, be  
25  
26 371 reported (personal communication, David Moher, May 22, 2019). Adoption and enforcement of  
27  
28 372 the updated PRISMA reporting standards by journals could result in authors being better  
29  
30 373 informed about the need for reporting funding sources and FCOI and in peer reviewers and  
31  
32 374 journals being more likely to require transparent reporting.  
33  
34  
35  
36  
37  
38

39 375 Members of our research team have previously recommended that risk of bias from trial  
40  
41 376 funding and trial author FCOIs be included in the Cochrane Risk of Bias Tool based on evidence  
42  
43 377 that links trial sponsorship and trial author FCOIs to outcomes.<sup>11</sup> This recommendation was  
44  
45 378 debated at a Cochrane Methods Symposium in 2013, but consensus was not reached for  
46  
47 379 inclusion.<sup>13, 22</sup> The present study found that 40% of Cochrane meta-analyses that  
48  
49 380 reported on FCOIs from included trials included this as part of a risk of bias assessment,  
50  
51 381 even though this has not been recommended by Cochrane. Currently, a new tool, the  
52  
53  
54  
55  
56  
57  
58  
59  
60

1  
2  
3 382 Tool for Addressing Conflicts of Interest in Trials (TACIT),<sup>23</sup> which specifically addresses risk  
4  
5 383 of bias from industry sponsorship of trials and author-industry financial ties and employment, is  
6  
7 384 being developed for inclusion in Cochrane reviews. Once the TACIT tool is completed, risk of  
8  
9 385 bias from trial funding and trial author FCOIs will be explicitly considered in Cochrane reviews  
10  
11 386 and, potentially, in non-Cochrane reviews, as well. Meanwhile, authors should, at a minimum,  
12  
13 387 describe FCOIs and discuss the degree to which they may influence confidence in findings.  
14  
15

### 16 17 388 **Strengths and limitations**

18  
19 389 A strength of the present study is that we assessed reporting in a large number of recently  
20  
21 390 published meta-analyses, including 107 Cochrane meta-analyses, which allowed us to compare  
22  
23 391 reporting practices among Cochrane and non-Cochrane meta-analyses and recent Cochrane  
24  
25 392 meta-analyses with Cochrane systematic reviews from 2010. However, there are limitations that  
26  
27 393 should be considered. First, we used impact factor as a rough proxy of the quality of the meta-  
28  
29 394 analyses included, but journal impact factor is very much an imperfect proxy; it does not  
30  
31 395 necessarily reflect the quality of the methods of the included meta-analyses. Rating meta-  
32  
33 396 analysis quality in all included meta-analyses was beyond the scope of our study, given the  
34  
35 397 resources that would have been required. Second, since most meta-analyses of drug trials are  
36  
37 398 published as Cochrane reviews or in relatively low-impact specialty medicine journals, we were  
38  
39 399 not able to conduct robust assessments of whether meta-analyses published in different types of  
40  
41 400 journals or journals with different impact factors are more or less likely to report on trial funding  
42  
43 401 and trial author FCOIs for included drug trials. The vast majority of meta-analyses published in  
44  
45 402 general medicine journals were from a single journal (*Medicine*), which further limited our  
46  
47 403 ability to examine this factor. However, the meta-analyses included in our study constituted a  
48  
49 404 consecutive sample of the most recent meta-analyses listed in PubMed and, thus, represented all  
50  
51  
52  
53  
54  
55  
56  
57  
58  
59  
60

1  
2  
3 405 meta-analyses of drug interventions listed in PubMed during the study period. Third, our study  
4  
5 406 examined only disclosed FCOIs. A surprising finding was that a higher proportion of Cochrane  
6  
7 407 meta-analysis authors indicated that they had FCOIs compared with non-Cochrane authors; it is  
8  
9 408 not known if this reflects greater industry involvement among Cochrane authors or a higher  
10  
11 409 propensity to report transparently and completely among this group of authors. Fourth,  
12  
13 410 information about FCOIs from included RCTs was not extracted from the RCT publications.  
14  
15 411 Fifth, our previous study of Cochrane reviews from 2010 included all systematic reviews,  
16  
17 412 whereas the present study was restricted to reviews with meta-analyses. However, a sensitivity  
18  
19 413 analysis showed that results did not change when we compared recent results to those from 2010  
20  
21 414 that were restricted to reviews with a meta-analysis.  
22  
23  
24

## 25 415 **Conclusions and policy implications**

26  
27  
28 416 In summary, the percentage of recent Cochrane meta-analyses on the effects of  
29  
30 417 drug interventions that transparently reported funding sources and trial author-industry  
31  
32 418 financial ties and employment for included trials far exceeds reporting in other journals.  
33  
34 419 It also far exceeds reporting in Cochrane systematic reviews published in 2010, before  
35  
36 420 the implementation by Cochrane of its policy requiring the reporting of trial funding sources and  
37  
38 421 author-industry FCOIs. These results suggest that it is possible to achieve more transparent  
39  
40 422 reporting of FCOIs from trials included in meta-analyses. We encourage the uptake and  
41  
42 423 enforcement of reporting requirements in the forthcoming updated PRISMA statement.<sup>24</sup> We  
43  
44 424 also encourage the adoption of Cochrane's new TACIT tool<sup>23</sup> by journals and authors in order to  
45  
46 425 assess trial funding sources and author FCOIs as risks of bias. Continued non-disclosure of  
47  
48 426 FCOIs when evidence is synthesized in meta-analyses misleads readers of medical journals into  
49  
50  
51  
52  
53  
54  
55  
56  
57  
58  
59  
60

1  
2  
3 427 believing that there is not risk of bias from FCOIs to be considered, even though an increasingly  
4  
5 428 robust evidence base tells us that this is often not the case.<sup>7, 8</sup>  
6  
7  
8  
9  
10  
11  
12  
13  
14  
15  
16  
17  
18  
19  
20  
21  
22  
23  
24  
25  
26  
27  
28  
29  
30  
31  
32  
33  
34  
35  
36  
37  
38  
39  
40  
41  
42  
43  
44  
45  
46  
47  
48  
49  
50  
51  
52  
53  
54  
55  
56  
57  
58  
59  
60

For peer review only

1  
2  
3 429 **Acknowledgement:** The authors thank Drs. Ian Shrier and Jonathan Kimmelman for providing  
4  
5 430 helpful comments on an earlier version of the manuscript. They were not compensated for their  
6  
7  
8 431 contribution. Ms. Turner was supported by a Fonds de Recherche Québec - Santé (FRQ-S)  
9  
10 432 masters training award, Ms. Levis was supported by a Canadian Institutes of Health Research  
11  
12 433 doctoral research award, and Drs. Benedetti and Thombs were supported by FRQ-S researcher  
13  
14 434 awards, all outside of the submitted work.

15  
16  
17 435 **Contributors:** KAT, MR, JB, LAB, JL, EHT, AB, and BDT were responsible for the study  
18  
19 436 conception and design. KAT, ACJ, CB, and KE were responsible for title and abstract and full-  
20  
21 437 text review. KAT and ACJ were responsible for data extraction and validation. KAT, BL, AB,  
22  
23 438 and BDT analysed and interpreted results. KAT and BDT drafted the manuscript. All  
24  
25 439 authors provided a critical review and approved the final manuscript. BDT is the  
26  
27 440 guarantor.

28  
29  
30  
31  
32 441 **Copyright for authors:** The Corresponding Author has the right to grant on behalf of  
33  
34 442 all authors and does grant on behalf of all authors, a worldwide licence  
35  
36 443 ([http://www.bmj.com/sites/default/files/BMJ%20Author%20Licence%20March%202013.](http://www.bmj.com/sites/default/files/BMJ%20Author%20Licence%20March%202013.doc)  
37  
38 444 [doc](#)) to the Publishers and its licensees in perpetuity, in all forms, formats and media  
39  
40 445 (whether known now or created in the future), to i) publish, reproduce, distribute,  
41  
42 446 display and store the Contribution, ii) translate the Contribution into other languages,  
43  
44 447 create adaptations, reprints, include within collections and create summaries, extracts  
45  
46 448 and/or, abstracts of the Contribution and convert or allow conversion into any format  
47  
48 449 including without limitation audio, iii) create any other derivative work(s) based in whole  
49  
50  
51  
52  
53  
54  
55  
56  
57  
58  
59  
60

1  
2  
3 450 or part on the on the Contribution, iv) to exploit all subsidiary rights to exploit all  
4  
5  
6 451 subsidiary rights that currently exist or as may exist in the future in the Contribution, v)  
7  
8  
9 452 the inclusion of electronic links from the Contribution to third party material where-ever  
10  
11 453 it may be located; and, vi) licence any third party to do any or all of the above. All  
12  
13  
14 454 research articles will be made available on an open access basis (with authors being  
15  
16 455 asked to pay an open access fee—see [http://www.bmj.com/about-bmj/resources-](http://www.bmj.com/about-bmj/resources-authors/forms-policies-and-checklists/copyright-open-access-and-permission-reuse)  
17  
18  
19 456 [authors/forms-policies-and-checklists/copyright-open-access-and-permission-reuse](http://www.bmj.com/about-bmj/resources-authors/forms-policies-and-checklists/copyright-open-access-and-permission-reuse)).  
20  
21  
22 457 The terms of such open access shall be governed by a Creative Commons licence—  
23  
24 458 details as to which Creative Commons licence will apply to the research article are set  
25  
26  
27 459 out in our worldwide licence referred to above.

28  
29  
30 460 **Funding:** There was no funding for the study.

31  
32 461 **Declaration of Competing Interests:** All authors have completed the ICMJE uniform  
33  
34 462 disclosure form at [www.icmje.org/coi\\_disclosure.pdf](http://www.icmje.org/coi_disclosure.pdf). Dr. Bero disclosed that she is Senior  
35  
36  
37 463 Editor, Cochrane Public Health and Health Systems, for which the University of Sydney  
38  
39  
40 464 receives remuneration. Dr. Thombs disclosed that he is a content editor with the  
41  
42  
43 465 Cochrane Common Mental Disorders review group (no remuneration received). All other  
44  
45  
46 466 authors declared: no support from any organisation for the submitted work; no financial  
47  
48 467 relationships with any organisations that might have an interest in the submitted work in the  
49  
50 468 previous three years; no other relationships or activities that could appear to have influenced the  
51  
52  
53 469 submitted work.

1  
2  
3 470 **Ethics Statement:** As this study involved only the review of published articles, research ethics  
4  
5 471 approval was not required.

7 472 **Transparency Declaration:** The manuscript's guarantor affirms that this manuscript is an  
8  
9 473 honest, accurate, and transparent account of the study being reported; that no important aspects  
10  
11 474 of the study have been omitted; and that any discrepancies from the study as planned (and, if  
12  
13 475 relevant, registered) have been explained.

16 476 **Data Sharing:** All extracted data are available in the main tables or in online supplementary  
17  
18 477 material. No additional data were extracted.



478 **REFERENCES**

- 479 1. Lexchin J, Bero LA, Djulbegovic B, Clark O. Pharmaceutical industry sponsorship and  
480 research outcome and quality: systematic review. *BMJ*. 2003;326(7400):1167-70.
- 481 2. Bero LA, Rennie D. Influences on the quality of published drug studies. *Int J Technol Assess*  
482 *Health Care*. 1996;12(2):209-37.
- 483 3. Melander H, Ahlqvist-Rastad J, Meijer G, Beermann B. Evidence based medicine—  
484 selective reporting from studies sponsored by pharmaceutical industry: review of studies in  
485 new drug applications. *BMJ*. 2003;326(7400):1171-3.
- 486 4. Rising K, Bacchetti P, Bero L. Reporting bias in drug trials submitted to the Food and Drug  
487 Administration: review of publication and presentation. *PLoS Med*. 2008;5(11):e217.4.
- 488 5. Sismondo S. How pharmaceutical industry funding affects trial outcomes: causal structures  
489 and responses. *Soc Sci Med*. 2008;66(9):1909-14.
- 490 6. Turner EH, Matthews AM, Linardatos E, Tell RA, Rosenthal R. Selective publication of  
491 antidepressant trials and its influence on apparent efficacy. *N Engl J Med*. 2008;358(3):252-  
492 60.
- 493 7. Ahn R, Woodbridge A, Abraham A, Saba S, Korenstein D, Madden E, et al. Financial ties of  
494 principal investigators and randomized controlled trial outcomes: cross sectional study. *BMJ*  
495 2017;356:i6770.
- 496 8. Lundh A, Lexchin J, Mintzes B, Schroll JB, Bero L. Industry sponsorship and research  
497 outcome. *Cochrane Database of Syst Rev*. 2017;2:MR000033.
- 498 9. Lexchin J. Those who have the gold make the evidence: how the pharmaceutical industry  
499 biases the outcomes of clinical trials of medications. *Sci Eng Ethics*. 2012;18(2):247-61.

- 1  
2  
3 500 10. Bekelman JE, Li Y, Gross CP. Scope and impact fo financial conflicts of interest in  
4  
5 501 biomedical research: a systematic review. *JAMA*. 2003;289(4):454-465.  
6  
7  
8 502 11. Roseman M, Milete K, Bero LA, Coyne JC, Lexchin J, Turner EH, et al. Reporting of  
9  
10 503 conflicts of interest in meta-analyses of trials of pharmacological treatments. *JAMA*.  
11  
12 504 2011;305(10):1008-17.  
13  
14  
15 505 12. Roseman M, Turner EH, Lexchin J, Coyne JC, Bero LA, Thombs BD. Reporting of conflicts  
16  
17 506 of interest from drug trials in Cochrane reviews: cross sectional study. *BMJ*.  
18  
19 507 2012;345:e5155.  
20  
21  
22 508 13. Bero LA. Why the Cochrane risk of bias tool should include funding source as a standard  
23  
24 509 item. *Cochrane Database of Syst Rev*. 2013;12:ED000075.  
25  
26  
27 510 14. Higgins J, Lasserson T, Chandler J, Tovey D, Churchill R. Methodological expectatinos of  
28  
29 511 Cochrane intervention reviews (MECIR). Version July 2019. Available from:  
30  
31 512 <https://community.cochrane.org/mecir-manual>. Accessed August 22, 2019.  
32  
33  
34 513 15. Moher D, Liberati A, Tetzlaff J, Altman DG. Preferred reporting items for systematic  
35  
36 514 reviews and meta-analyses: the PRISMA statement. *BMJ*. 2009;339:b2535.  
37  
38  
39 515 16. Liberati A, Altman DG, Tetzlaff J, Mulrow C, Gøtzsche PC, Ioannidis JPA, et al. The  
40  
41 516 PRISMA statement for reporting systematic reviews and meta-analyses of studies that  
42  
43 517 evaluate healthcare interventions: explanation and elaboration. *BMJ*. 2009;339:b2700.  
44  
45  
46 518 17. Administration USFaD. Drugs@FDA: FDA Approved Drug Products Database. Available  
47  
48 519 from: <https://www.accessdata.fda.gov/scripts/cder/daf/>. Accessed August 22, 2019.  
49  
50  
51 520 18. Drazen JM, Van Der Weyden MB, Sahni P, Rosenberg J, Marusic A, Laine C, et al.  
52  
53 521 Uniform format for disclosure of competing interests in ICMJE journals. *JAMA*.  
54  
55 522 2010;303(1):75-6.  
56  
57  
58  
59  
60

- 1  
2  
3 523 19. Newcombe RG. Interval estimation for the difference between independent proportions:  
4  
5 524 comparison of eleven methods. *Stat Med*. 1998;17(8):873-90.  
6  
7  
8 525 20. R Core Team. *R: A language and environment for statistical computing*. R Foundation for  
9  
10 526 Statistical Computing; 2018.  
11  
12 527 21. RStudio Team. *RStudio: Integrated development for R*. Boston, MA: RStudio, Inc.; 2015.  
13  
14  
15 528 22. Sterne JA. Why the Cochrane risk of bias tool should not include funding source as a  
16  
17 529 standard item. *Cochrane Database Syst Rev*. 2013(12).  
18  
19 530 23. Lundh A. Tool for Addressing Conflicts of Interest in Trials (TACIT) in Cochrane Reviews  
20  
21 531 [PowerPoint slides]. 2018.  
22  
23  
24  
25 532 24. Page MJ, McKenzie JE, Bossuyt PM, Boutron I, Hoffmann T, Mulrow CD, Shamseer L,  
26  
27 533 Moher, D. Updating the PRISMA reporting guideline for systematic reviews and meta -  
28  
29 534 analyses: study protocol. 2018. Available from: <https://osf.io/xwcv5/>. Accessed August 22,  
30  
31 535 2019.  
32  
33  
34  
35 536

1  
2  
3 537 **FIGURES**  
4  
5

6 538 **Figure 1.** Flow diagram of selection of eligible meta-analyses.  
7  
8

9  
10 539 **Figure 2.** Percentage of recently published Cochrane and non-Cochrane meta-analyses and 2010  
11  
12 540 Cochrane systematic reviews that reported included trial funding source, author-industry  
13  
14 541 financial ties, and author-industry employment for some or all included trials.  
15  
16

17  
18 542  
19  
20  
21  
22  
23  
24  
25  
26  
27  
28  
29  
30  
31  
32  
33  
34  
35  
36  
37  
38  
39  
40  
41  
42  
43  
44  
45  
46  
47  
48  
49  
50  
51  
52  
53  
54  
55  
56

**Table 1. Characteristics of included meta-analyses**

|                                                                                               | <b>Cochrane<br/>Meta-Analyses<br/>(N = 107)</b> | <b>Non-Cochrane<br/>Meta-Analyses<br/>(N = 143)</b> |
|-----------------------------------------------------------------------------------------------|-------------------------------------------------|-----------------------------------------------------|
| <b>Year of publication</b>                                                                    |                                                 |                                                     |
| 2016, <i>N (%)</i>                                                                            | 0                                               | 4 (3%)                                              |
| 2017, <i>N (%)</i>                                                                            | 22 (21%)                                        | 31 (22%)                                            |
| 2018, <i>N (%)</i>                                                                            | 85 (79%)                                        | 108 (76%)                                           |
| <b>Number of Included RCTs, mean ± SD</b>                                                     | 21.4 ± 24.4                                     | 19.6 ± 46.4                                         |
| <b>Registered in PROSPERO or Published Protocol, <i>N (%)</i></b>                             | 107 (100%)                                      | 25 (17%) <sup>a</sup>                               |
| <b>Impact Factor, mean ± SD</b>                                                               |                                                 |                                                     |
| ≤ 3                                                                                           | 0                                               | 106 (74%)                                           |
| 3.1-6.7                                                                                       | 0                                               | 27 (19%)                                            |
| 6.8                                                                                           | 107 (100%)                                      | 0                                                   |
| > 6.8                                                                                         | 0                                               | 10 (7.0%)                                           |
| <b>Meta-Analysis Funding Sources</b>                                                          |                                                 |                                                     |
| Not reported                                                                                  | 4 (4%) <sup>b</sup>                             | 39 (27%)                                            |
| Industry                                                                                      | 0                                               | 3 (2%)                                              |
| Non-Industry                                                                                  | 93 (87%)                                        | 55 (38%)                                            |
| No funding                                                                                    | 10 (9%)                                         | 46 (32%)                                            |
| <b>Meta-Analysis Author Financial Ties to Industry<br/>(Including Employment)<sup>c</sup></b> |                                                 |                                                     |
| Not reported, <i>N (%)</i>                                                                    | 1 (1%)                                          | 11 (8%)                                             |
| No authors with reported financial ties, <i>N (%)</i>                                         | 70 (65%)                                        | 117 (81%)                                           |

|                                                                            |           |          |
|----------------------------------------------------------------------------|-----------|----------|
| ≥ 1 author with reported financial ties, <i>N (%)</i>                      | 36 (34%)  | 15 (10%) |
| Proportion of authors with financial ties,<br><i>mean ± SD<sup>d</sup></i> | 11% ± 17% | 4% ± 15% |

### Journal Category

|                                                            |            |           |
|------------------------------------------------------------|------------|-----------|
| Cochrane review, <i>N (%)</i>                              | 107 (100%) | 0         |
| Specialty medicine <i>N (%)</i>                            | 0          | 100 (70%) |
| General medicine (non-Cochrane), <sup>f</sup> <i>N (%)</i> | 0          | 33 (23%)  |
| Multidisciplinary, <sup>g</sup> <i>N (%)</i>               | 0          | 10 (7%)   |

543 <sup>a</sup>One meta-analysis reported that they registered in PROSPERO but did not provide a registration number and one  
544 could not be found. We contacted the authors and they did not provide us with further information; thus this was  
545 coded as not registered. <sup>b</sup>Only 3 included meta-analyses reported author-industry employment and these were  
546 grouped with author-industry financial ties for this table <sup>c</sup>Cochrane reviews typically have a “Sources of Support”  
547 section with funding information. These reviews did not include that section. <sup>d</sup>Proportion of authors with financial  
548 ties or employment of those that reported. <sup>e</sup>Classifications for specialty medicine journals (note that some journals  
549 had more than one classification): Anesthesiology, N = 3; Biochemistry & Molecular Biology, N = 1; Biotechnology  
550 & Applied Microbiology, N = 2; Cardiac & Cardiovascular Systems, N = 7; Cell Biology, N = 1; Chemistry,  
551 Medicinal, N = 4; Chemistry, Multidisciplinary, N = 2; Clinical Neurology, N = 6; Critical Care Medicine, N = 2;  
552 Dermatology, N = 3; Emergency Medicine, N = 2; Endocrinology & Metabolism, N = 2; Gastroenterology &  
553 Hepatology, N = 6; Genetics & Heredity, N = 1; Hematology, N = 2; Immunology, N = 6; Infectious Diseases, N =  
554 = 3; Integrative & Complementary Medicine, N = 1; Medicine, Research & Experimental, N = 3; Microbiology, N =  
555 2; Neurosciences, N = 3; No classification, N = 2; Obstetrics & Gynecology, N = 4; Oncology, N = 11;  
556 Ophthalmology, N = 3; Orthopedics, N = 6; Parasitology, N = 1; Peripheral Vascular Disease, N = 5; Pharmacology  
557 & Pharmacy, N = 13; Physiology, N = 1; Psychiatry, N = 4; Psychology, N = 1; Reproductive Biology, N = 1;  
558 Respiratory System, N = 6; Rheumatology, N = 3; Sport Sciences, N = 1; Surgery, N = 11; Toxicology, N = 2;  
559 Tropical Medicine, N = 1; Urology & Nephrology, N = 1. <sup>f</sup>Of the 33 included general medicine journals, 28 were  
560 published in the journal “Medicine”. <sup>g</sup>Of the 10 journals classified as multidisciplinary, 9 were published in the  
561 journal “PLOS ONE”.

**Table 2. Summary of reporting patterns of disclosed funding source and author-industry FCOI from included RCTs**

|                                                                                                                                                   | Number of Meta-analyses Reporting Funding Sources of Included RCTs |                 |                  | Number of Meta-analyses Reporting Author Financial Ties of Included RCTs |                  |                  | Number of Meta-analyses Reporting Author-Industry Employment of Included RCTs |                 |                 |
|---------------------------------------------------------------------------------------------------------------------------------------------------|--------------------------------------------------------------------|-----------------|------------------|--------------------------------------------------------------------------|------------------|------------------|-------------------------------------------------------------------------------|-----------------|-----------------|
|                                                                                                                                                   | Full                                                               | Partial         | Full or Partial  | Full                                                                     | Partial          | Full or Partial  | Full                                                                          | Partial         | Full or Partial |
|                                                                                                                                                   | <b>Recently Published Meta-analyses:</b>                           |                 |                  |                                                                          |                  |                  |                                                                               |                 |                 |
| Cochrane (N = 107), N (%)                                                                                                                         | 70 (65%)                                                           | 20 (19%)        | 90 (84%)         | 24 (22%)                                                                 | 23 (21%)         | 47 (44%)         | 1 (1%)                                                                        | 17 (16%)        | 18 (17%)        |
| Non-Cochrane (N = 143), N (%)                                                                                                                     | 14 (10%)                                                           | 7 (5%)          | 21 (15%)         | 1 (1%)                                                                   | 1 (1%)           | 2 (1%)           | 0                                                                             | 1 (1%)          | 1 (1%)          |
| <b>Difference in Reporting Between Cochrane and Non-Cochrane Meta-analyses, % (95% CI)</b>                                                        | 56% (44% to 65%)                                                   | 14% (6% to 23%) | 69% (59% to 77%) | 22% (14% to 31%)                                                         | 21% (13% to 30%) | 43% (33% to 52%) | 1% (-2% to 5%)                                                                | 15% (9% to 23%) | 16% (9% to 24%) |
| <b>2010:</b>                                                                                                                                      |                                                                    |                 |                  |                                                                          |                  |                  |                                                                               |                 |                 |
| All Cochrane Systematic Reviews (N = 151), N (%) <sup>a</sup>                                                                                     | 30 (20%)                                                           | 16 (11%)        | 46 (30%)         | 2 (1%)                                                                   | 9 (6%)           | 11 (7%)          | 0                                                                             | 10 (7%)         | 10 (7%)         |
| <b>Difference in Reporting Between Recently Published Cochrane Meta-analyses versus Cochrane Systematic Reviews Published in 2010, % (95% CI)</b> | 46% (34% to 56%)                                                   | 8% (-1% to 18%) | 54% (42% to 63%) | 21% (13% to 30%)                                                         | 16% (7% to 25%)  | 37% (26% to 47%) | 1% (-2% to 5%)                                                                | 9% (2% to 18%)  | 10% (2% to 19%) |
| <b>2010:</b>                                                                                                                                      |                                                                    |                 |                  |                                                                          |                  |                  |                                                                               |                 |                 |
| Cochrane Meta-analyses (N = 119),                                                                                                                 | 21 (19%)                                                           | 15 (13%)        | 36 (30%)         | 0 (0%)                                                                   | 7 (6%)           | 7 (6%)           | 0 (0%)                                                                        | 7 (6%)          | 7 (6%)          |

1  
2  
3  
4  
5  
6  
7  
8  
9  
10  
11  
12  
13  
14  
15  
16  
17  
18  
19  
20  
21  
22  
23  
24  
25  
26  
27  
28  
29  
30  
31  
32  
33  
34  
35  
36  
37  
38  
39  
40  
41  
42  
43  
44  
45  
46  
47

N (%)

---

|                                           |              |              |              |              |             |              |             |             |             |
|-------------------------------------------|--------------|--------------|--------------|--------------|-------------|--------------|-------------|-------------|-------------|
| <b>Difference in Reporting Between</b>    | 48%          | 6%           | 54%          | 22%          | 16%         | 38%          | 1%          | 10%         | 11%         |
| <b>Recently Published Cochrane Meta-</b>  | (36% to 58%) | (-3% to 16%) | (42% to 63%) | (15% to 31%) | (7% to 25%) | (27% to 48%) | (-2% to 5%0 | (2% to 19%) | (3% to 20%) |
| <b>analyses versus Cochrane Meta-</b>     |              |              |              |              |             |              |             |             |             |
| <b>analyses Published in 2010, % (95%</b> |              |              |              |              |             |              |             |             |             |
| <b>CI)</b>                                |              |              |              |              |             |              |             |             |             |

---

562 <sup>a</sup>Results from Roseman et al., 2012.

For peer review only



**Table 3. Factors associated with reporting funding sources of included RCTs**

|                                                                         | <b>Proportion that<br/>reported some or<br/>all declared<br/>funding sources<br/>from included<br/>RCTs</b> | <b>Unadjusted odds<br/>ratio (95% CI)</b> | <b>Adjusted odds ratio<br/>(95% CI)</b> |
|-------------------------------------------------------------------------|-------------------------------------------------------------------------------------------------------------|-------------------------------------------|-----------------------------------------|
| <b>FCOI of meta-analysis<br/>(including meta-analysis<br/>funding)</b>  |                                                                                                             |                                           |                                         |
| reference = no FCOI                                                     | 67/151 (44%)                                                                                                |                                           |                                         |
| Any disclosed FCOI                                                      | 35/51 (69%)                                                                                                 | 2.74 (1.42 to 5.49)                       | 1.29 (0.53 to 3.19)                     |
| Not reported                                                            | 9/48 (19%)                                                                                                  | 0.29 (0.12 to 0.62)                       | 1.18 (0.40 to 3.44)                     |
| <b>Impact Factor and Journal<br/>Type</b>                               |                                                                                                             |                                           |                                         |
| reference = Cochrane                                                    | 90/107 (84%)                                                                                                |                                           |                                         |
| Specialty impact factor $\leq 3^b$                                      | 4/65 (6%)                                                                                                   | 0.01 (< 0.01 to 0.03)                     | 0.01 (< 0.01 to 0.04)                   |
| General (N=31) or<br>Multidisciplinary (N=10)<br>impact factor $\leq 3$ | 4/41 (10%)                                                                                                  | 0.02 (< 0.01 to 0.06)                     | 0.02 (< 0.01 to 0.06)                   |
| Specialty impact factor 3.1 -<br>6.7 <sup>c</sup>                       | 10/27 (37%)                                                                                                 | 0.11 (0.04 to 0.28)                       | 0.11 (0.04 to 0.28)                     |
| Specialty (N=8) or General<br>(N=2) impact factor > 6.8                 | 3/10 (30%)                                                                                                  | 0.08 (0.02 to 0.32)                       | 0.08 (0.02 to 0.32)                     |

1  
2  
3  
4  
5  
6  
7  
8  
9  
10  
11  
12  
13  
14  
15  
16  
17  
18  
19  
20  
21  
22  
23  
24  
25  
26  
27  
28  
29  
30  
31  
32  
33  
34  
35  
36  
37  
38  
39  
40  
41  
42  
43  
44  
45  
46  
47  
48  
49  
50  
51  
52  
53  
54  
55  
56  
57  
58  
59  
60

563 <sup>a</sup>Not reported included meta-analyses for which the presence of FCOI could not be determined  
 564 because either meta-anlaysis funding, meta-analysis author FCOI, or both were not reported.  
 565 <sup>b</sup> Two meta-analyses were from journals that did not have an impact factor, and these were coded as having an impact factor of 0.5 for our  
 566 analyses.  
 567 <sup>c</sup> There were no multidisciplinary or general medicine journals with an impact factor of 3.1-6.7.  
 568 FCOI = financial conflicts of interest

569

For peer review only

1  
2  
3  
4  
5  
6  
7  
8  
9  
10  
11  
12  
13  
14  
15  
16  
17  
18  
19  
20  
21  
22  
23  
24  
25  
26  
27  
28  
29  
30  
31  
32  
33  
34  
35  
36  
37  
38  
39  
40  
41  
42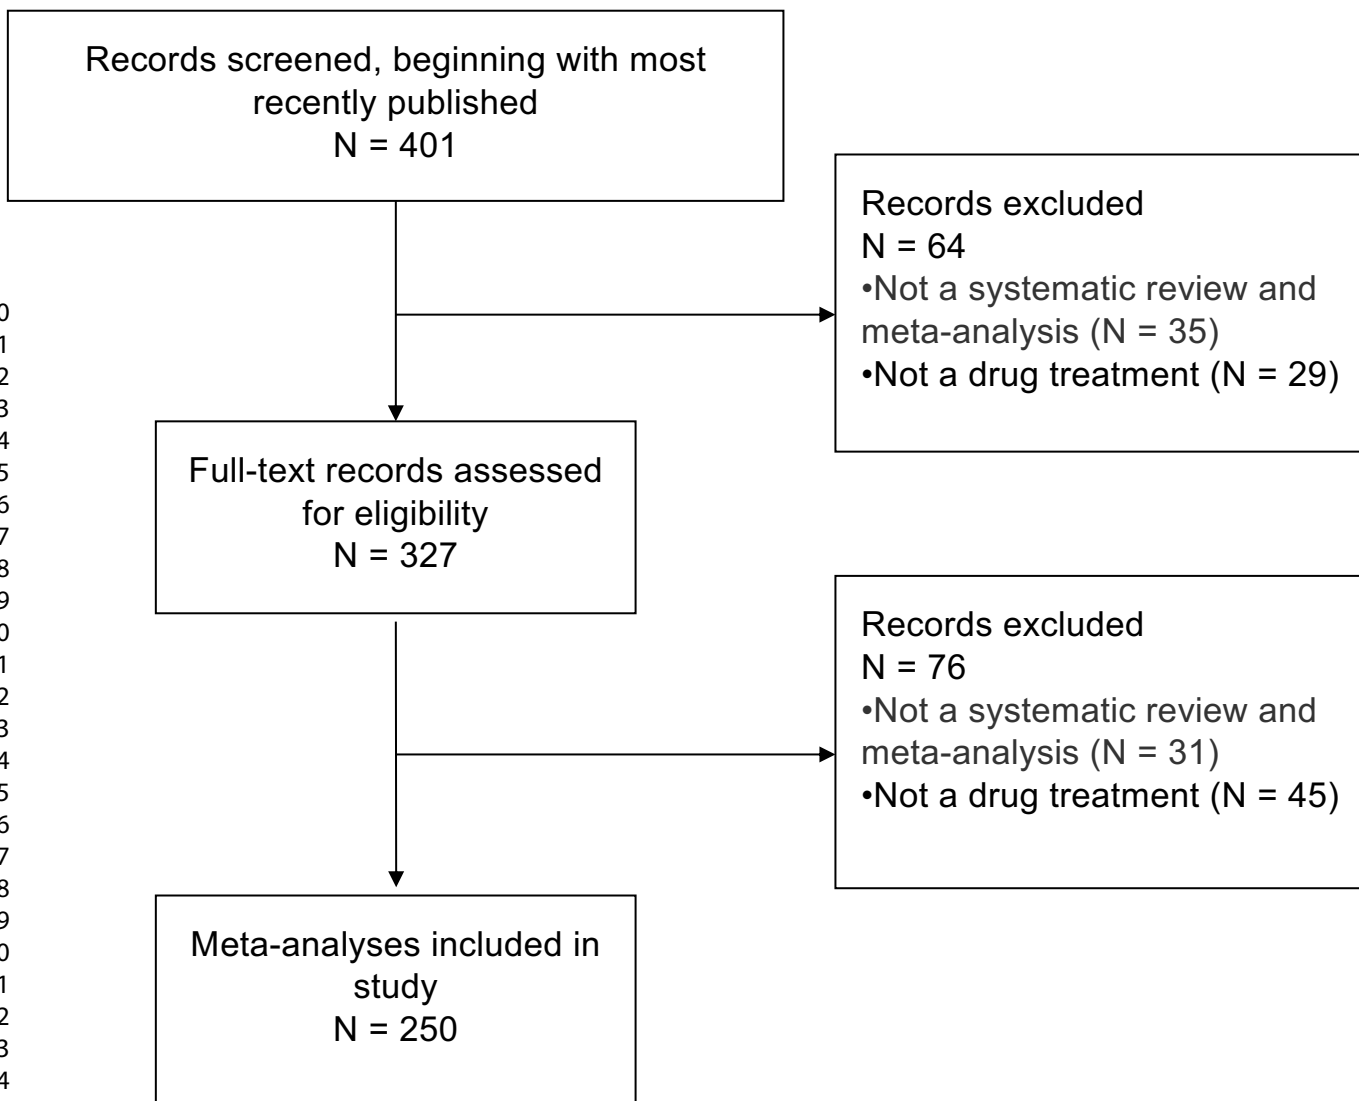

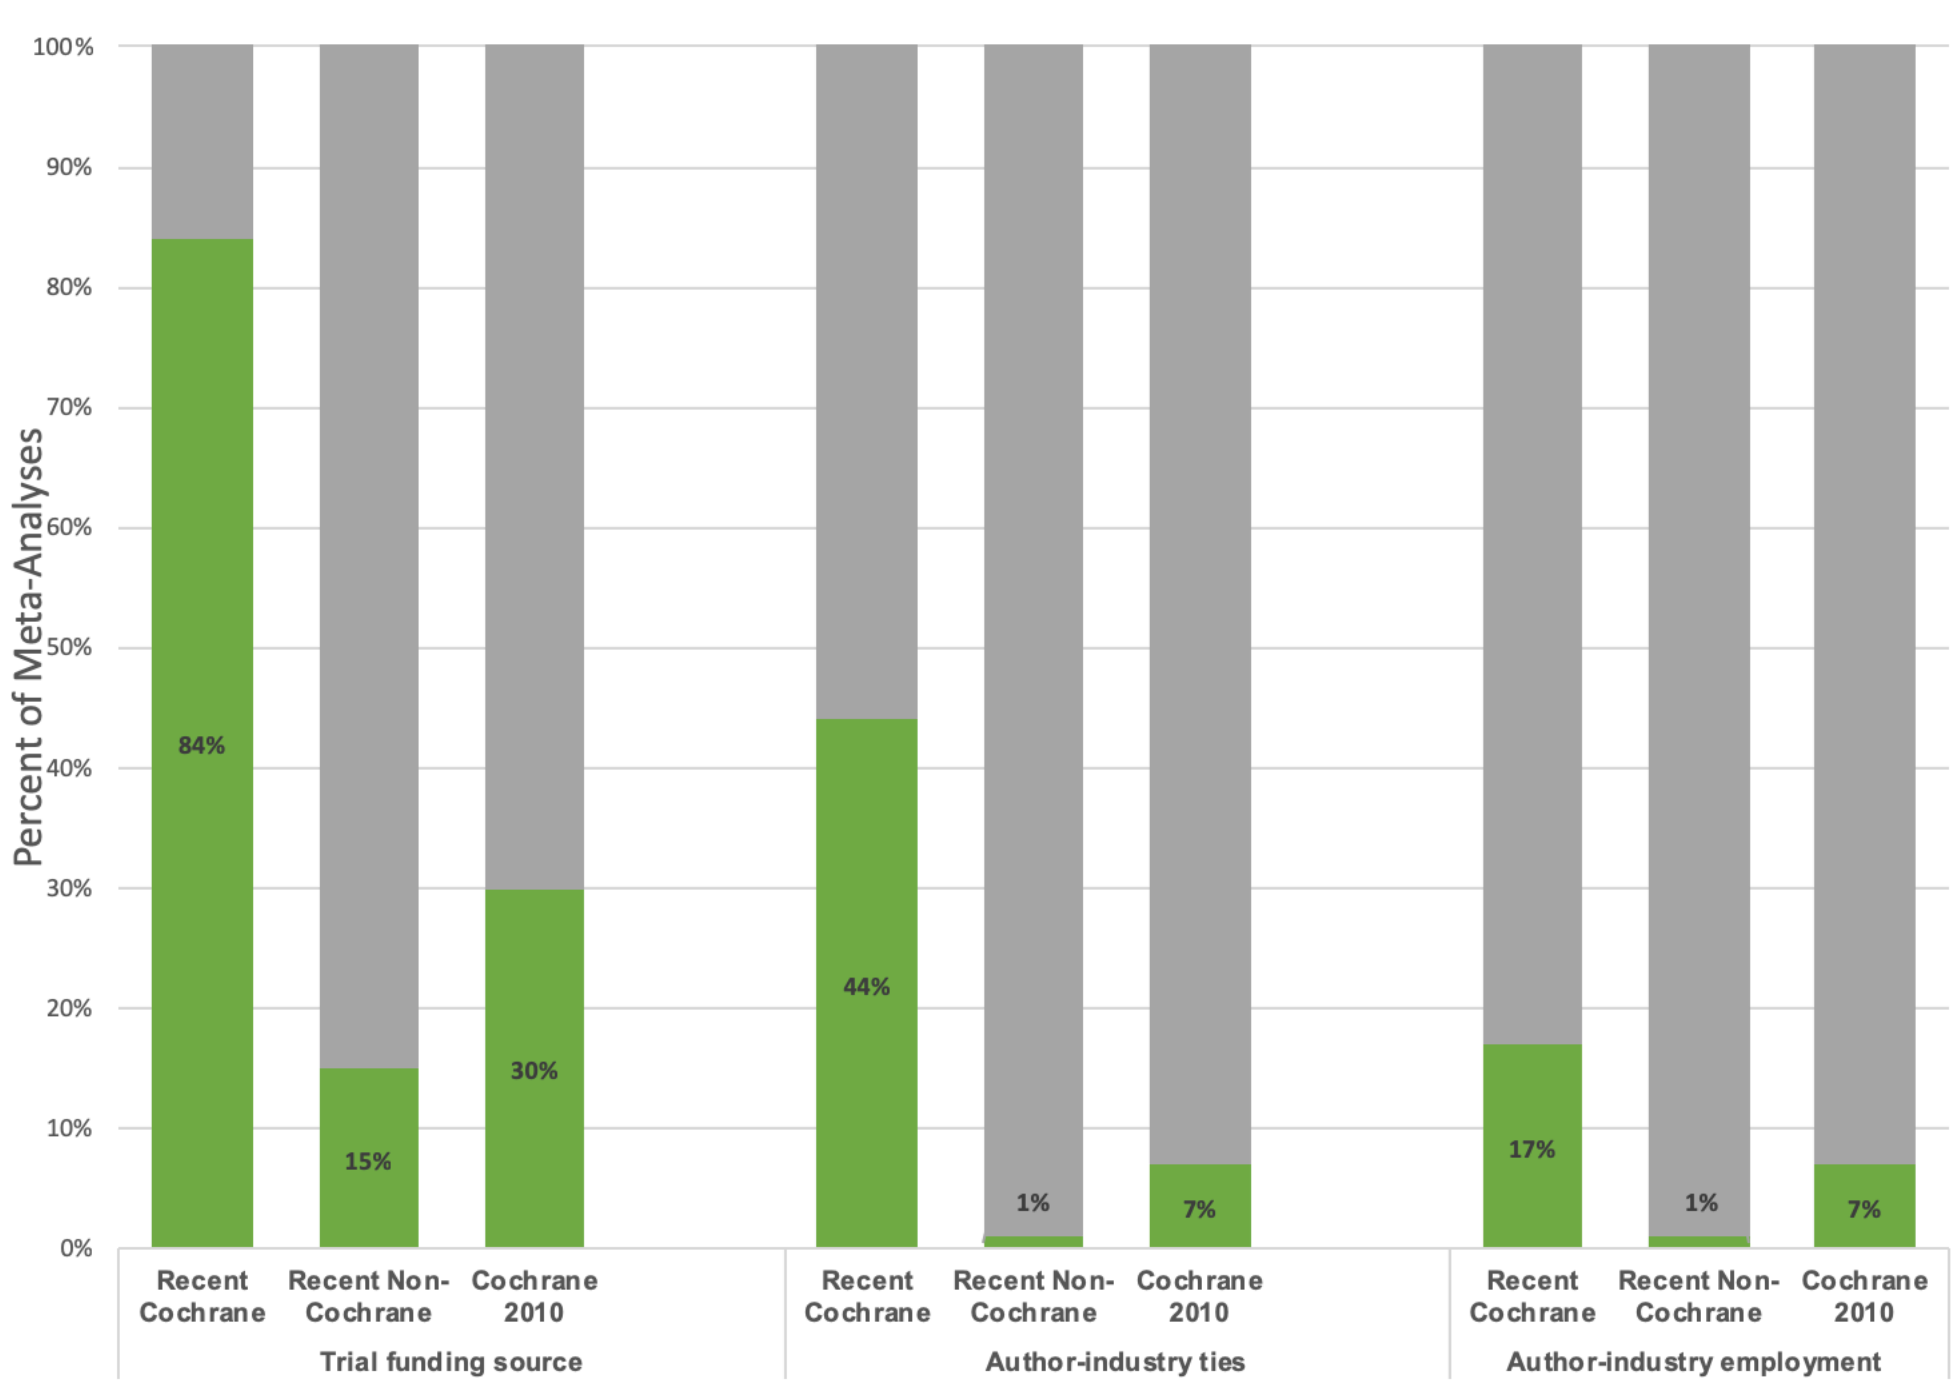

1  
2  
3 **Supplementary Material**  
4  
5  
6  
7

8 **eMethods1.** Search strategy  
9

10 **eMethods2.** Data extraction form  
11

12 **eMethods3.** Power analysis  
13

14 **eTable1.** Detailed characteristics of included meta-analyses  
15

16 **eTable2.** Detailed reporting of study funding source, author-industry financial ties, and author-  
17 industry employment from included RCTs  
18  
19  
20  
21  
22  
23  
24  
25  
26  
27  
28  
29  
30  
31  
32  
33  
34  
35  
36  
37  
38  
39  
40  
41  
42  
43  
44  
45  
46  
47  
48  
49  
50  
51  
52  
53  
54  
55  
56  
57  
58  
59  
60

1  
2  
3 **eMethods1. Search strategy**  
4

5 To obtain our sample, we searched the MEDLINE database via PubMed on October 19,  
6 2018 using the following search strategy:  
7  
8

9  
10  
11 (((("Randomized Controlled Trials as Topic"[Mesh] or randomized control trial  
12 [tiab] or randomized controled trial [tiab] OR randomized controlled trial [tiab] or  
13 randomized control trials [tiab] OR randomized controled trials [tiab] OR  
14 Randomized controlled trials [tiab] or randomised control trial [tiab] or randomised  
15 controled trial [tiab] OR randomised controlled trial [tiab] or randomised control  
16 trials [tiab] OR randomised controled trials [tiab] OR Randomised controlled trials  
17 [tiab]) AND ("Therapeutic Uses"[Mesh] OR "Vaccines"[Mesh]) AND ("Meta-  
18 Analysis" [Publication Type] or meta analysis [tiab]) AND (systematic review  
19 [tiab] OR search [tiab] or searched [tiab] or MEDLINE [tiab] OR PubMed [tiab])))  
20  
21  
22  
23  
24  
25  
26  
27  
28  
29  
30  
31  
32  
33  
34  
35  
36  
37  
38  
39  
40  
41  
42  
43  
44  
45  
46  
47  
48  
49  
50  
51  
52  
53  
54  
55  
56  
57  
58  
59  
60

1  
2  
3 **eMethods 2.** Data extraction form  
4  
5  
6  
7

8 **First Author, last name:** Last name of first author of meta-analysis  
9

10  
11 **Year of publication (or in press):** Year of publication of meta-analysis  
12  
13

14  
15 **Journal:** Name of journal in which meta-analysis was published  
16  
17

18 **Journal Impact factor:** Where meta-analysis published (low-high split or continuous based on  
19 data distribution)  
20  
21

22  
23 **Specialty area of Journal:** Where meta-analysis published (per Thomson Reuters Journal  
24 Science Citation Index - Expanded categories)  
25  
26

27  
28 **Cochrane Review (Y/N):** Is the meta-analysis a Cochrane Review? Select "Yes" even if the  
29 Cochrane Review is being published in another journal  
30  
31

32 Response from radio options:

- 33  
34 - Y (Yes)  
35 - N (No)  
36  
37

38  
39 **Journal policies for reporting COI of Included Trials:** Presence or absence of instructions for  
40 reporting in the author instructions  
41

- 42 - Y (Yes)  
43 - N (No)  
44  
45

46  
47 **# of RCTs synthesized in Meta-Analysis** (total RCTs in included meta-analysis related to  
48 drugs)  
49  
50  
51  
52  
53  
54  
55  
56  
57  
58  
59

1  
2  
3 **Date Range of Included Trials:** Date range in years of publication of studies (RCTs) included  
4 related to drugs in the meta-analysis (XXXX - XXXX). Use "In press" for end date if there are in  
5 press trials. Use "Unpublished" if a trial is in progress or has never been published.  
6  
7  
8  
9

10 **Study population:** Characteristics of study population of included trials (e.g. condition/disorder,  
11 adult/child)  
12  
13

14  
15 **Pharmacological agent:** Pharmacologic treatment evaluated in the meta-analysis

- 16 - Name(s) of treatment if specific drug(s) investigated
- 17 - Class of treatment if broader category of drugs investigated, and number of drugs  
18 evaluated (e.g. SSRIs – 5 included)  
19  
20  
21  
22  
23

24 **Control/comparison arms:** Other treatment arms (control/comparison) included in the meta-  
25 analysis (e.g. placebo, name of comparison pharmacologic treatment, name of behavioral  
26 intervention)  
27  
28  
29  
30

31 **Meta-Analysis Author Financial Ties / Funding Sources Reported:** Does the meta-analysis  
32 report meta-analysis author financial ties (including former and current industry employment)  
33 and/or the funding source? Note that reporting "no funding" is different from not reporting.  
34  
35

36 Response from radio options:

- 37 - Meta-analysis author financial ties
- 38 - Meta-analysis funding sources
- 39 - Both financial ties and funding sources
- 40 - Neither reported  
41  
42  
43  
44  
45

46 **Funding Source of Meta-Analysis (if applicable – only shown if above item indicates meta-  
47 analysis funding sources reported or both financial ties and meta-analysis funding sources  
48 reported)** Source of financial support for the meta-analysis:  
49  
50

51 Response from radio options:

- 52 - Industry
- 53 - Combined industry and non-industry  
54  
55  
56  
57  
58  
59  
60



- Non-industry (e.g. public granting agency, private not-for-profit granting agency)
- No study funding

**Type of Industry Funding (if applicable – only shown if above item indicates industry funding or combined industry and non-industry present):** If the meta-analysis is industry funded, what is the type of support provided by industry? Response from radio options:

- Financial support
- Resources (e.g. statistical analyses)
- Both financial support and resources

**# of Meta-Analysis Authors:** Number of authors of the meta-analysis (count authors named in byline or in an author group)

**# of Meta-Analysis Authors with Financial Ties to Industry (if applicable – only shown if meta-analysis author financial ties or both financial ties and meta-analysis funding sources are reported):** Number of authors of the meta-analysis who have financial ties such as industry board member, consultant, investments, patents, research funding, royalties (including former, and excluding current industry employment):

- Numbers 0 -  $\geq 10$

**# Meta-Analysis Authors with Current Industry Employment (if applicable – only shown if meta-analysis author financial ties or both financial ties and meta-analysis funding sources are reported):** Number of authors of the meta-analysis who are current industry employees.

Response from radio options:

Numbers 0 -  $\geq 10$

**Quality or Risk Assessment of Included RCTs (Y/N):** Was quality or risk assessment of included RCTs, by methods from Cochrane, Jadad, etc., reported in the meta-analysis.

Response from radio options:

- Y (Yes)
- N (No)

1  
2  
3  
4  
5 **Quality or Risk Assessment Method of Included RCTs (if applicable – only shown if**  
6 **answer to previous item is yes- quality or risk assessment of included RCTs is reported):** If  
7 the meta-analysis authors report a quality or risk assessment method of included RCTs, what is  
8 the reported method of quality assessment?  
9  
10  
11  
12

13 **Meta-analysis Authors Report Funding Sources of Included Studies:** Response from radio  
14 options:  
15

- 16 - Reported for each included study
  - 17 - Reported in summary statement or for some, but not all, trials
  - 18 - Included study funding sources not reported
- 19  
20  
21  
22  
23

24 **Placement in publication of Included RCTs' Funding Source** (if applicable – only shown if  
25 the response to Meta-analysis Authors Report Funding Sources of Included Studies is (1)  
26 Reported for Each included Study or (2) Reported in summary statement or for some, but not all,  
27 trials):  
28  
29

- 30 - Abstract
  - 31 - Main text, other than risk of bias or quality section
  - 32 - In risk of bias or quality assessment
  - 33 - Other in main document (e.g., a characteristics of studies table, other table, in a  
34 footnote of a table
  - 35 - Online appendix
  - 36 - Lay Summary
- 37  
38  
39  
40  
41  
42  
43  
44

45 **Placement in risk of bias or quality assessment of Included RCTs' Funding Source** (if  
46 applicable – only shown if placement in publication of included RCT's Funding Source is risk of  
47 bias or quality assessment):  
48  
49

- 50 - Text
  - 51 - Figure/table
  - 52 - Both text and figure/table
- 53  
54  
55  
56  
57  
58  
59  
60

1  
2  
3 **Meta-analysis Authors Report Author Financial Ties of Included Studies:** Response from  
4 radio options:

- 5  
6  
7 - Reported for each included study  
8 - Reported in summary statement or for some, but not all, trials  
9  
10 - Included study author financial ties not reported  
11  
12

13 **Placement in publication of Included RCTs' Author Financial Ties** (if applicable – only  
14 shown if the response Meta-analysis Authors Report Author Financial Ties of Included Studies is  
15 (1) Reported for Each included Study or (2) Reported in summary statement or for some, but not  
16 all, trials):  
17  
18

- 19  
20 - Abstract  
21  
22 - Main text, other than risk of bias or quality section  
23  
24 - In risk of bias or quality assessment  
25  
26 - Other in main document (e.g., a characteristics of studies table, other table, in a  
27 footnote of a table  
28  
29 - Online appendix  
30  
31 - Lay Summary  
32  
33

34 **Placement in risk of bias or quality assessment of Included RCTs' Author Financial Ties** (if  
35 applicable – only shown if placement in publication of included RCT's Author Financial ties is  
36 risk of bias or quality assessment):  
37  
38

- 39 - Text  
40  
41 - Figure/table  
42  
43 - Both text and figure/table  
44  
45

46 **Meta-analysis Authors Report Author Industry Employment of Included Studies:** Do the  
47 authors of the meta-analysis report current author industry affiliation (employment) for the  
48 included studies? Response from radio options:  
49

- 50  
51 - Reported for each included study  
52  
53 - Reported in summary statement or for some, but not all, trials  
54  
55 - Included study author industry employment not reported  
56  
57  
58  
59

1  
2  
3  
4  
5 **Placement in publication of Included RCTs' Author Industry Employment** (if applicable –  
6 only shown if the response to Meta-analysis Authors Report Author Industry Affiliation  
7 (Employment) of Included Studies is (1) Reported for Each included Study or (2) Reported in  
8 summary statement or for some, but not all, trials):  
9

- 10 - Abstract
- 11 - Main text, other than risk of bias or quality section
- 12 - In risk of bias or quality assessment
- 13 - Other in main document (e.g., a characteristics of studies table, other table, in a  
14 footnote of a table)
- 15 - Online appendix
- 16 - Lay Summary

17  
18  
19  
20  
21  
22  
23  
24  
25  
26 **Placement in risk of bias or quality assessment of Included RCTs' Author Industry**  
27 **Employment** (only shown if placement in publication of included RCT's Author Industry  
28 Affiliation is risk of bias or quality assessment):  
29

- 30 - Text
- 31 - Figure/table
- 32 - Both text and figure/table

33  
34  
35  
36  
37  
38 **Do the authors report a PROSPERO registration number in the text?**

- 39 - Yes
- 40 - No

41  
42  
43 **What is the registration number (e.g., CRD42017062454)?** (if applicable – only shown if the  
44 response to Do the authors report a PROSPERO registration number in the text? Is yes)  
45

46  
47  
48 **What stages were completed (ignore started) at the time of registration. Make sure to select**  
49 **the earliest registration version at the bottom of the page. Please check all stages that were**  
50 **completed.** (if applicable – only shown if the response to Do the authors report a PROSPERO  
51 registration number in the text? Is yes)  
52

- 53 - Preliminary searches

- Piloting of the study selection process
- Formal screening of search results against eligibility criteria
- Data extraction
- Risk of bias (quality) assessment
- Data analysis
- None completed

**Was a registration found in PROSPERO?** (if applicable – only shown if the response to Do the authors report a PROSPERO registration number in the text? Is no)

**What is the registration number (e.g., CRD42017062454)?** (if applicable – only shown if the response to Was a registration found in PROSPERO? Is yes)

**What stages were completed (ignore started) at the time of registration. Make sure to select the earliest registration version at the bottom of the page. Please check all stages that were completed.** (if applicable – only shown if the response to Was a registration found in PROSPERO? Is yes)

- Preliminary searches
- Piloting of the study selection process
- Formal screening of search results against eligibility criteria
- Data extraction
- Risk of bias (quality) assessment
- Data analysis
- None completed

1  
2  
3 **eMethods3. Power analysis**  
4  
5  
6

7 **Allocation ratio: 50% and 50% (1:1)**

8 20% difference

| 9 Proportion reporting<br>COI |                   | 10 Sample size<br>group 1 | 11 Sample size<br>group 2 | 12 Sample size<br>total | 13 Actual power | 14 Actual alpha |
|-------------------------------|-------------------|---------------------------|---------------------------|-------------------------|-----------------|-----------------|
| 15 Low impact                 | 16 High<br>impact |                           |                           |                         |                 |                 |
| 17 10%                        | 18 30%            | 19 69                     | 20 69                     | 21 138                  | 22 .807         | 23 .033         |
| 24 20%                        | 25 40%            | 26 90                     | 27 90                     | 28 180                  | 29 .802         | 30 .037         |
| 31 30%                        | 32 50%            | 33 102                    | 34 102                    | 35 204                  | 36 .806         | 37 .042         |
| 38 40%                        | 39 60%            | 40 102                    | 41 102                    | 42 204                  | 43 .801         | 44 .038         |
| 45 50%                        | 46 70%            | 47 102                    | 48 102                    | 49 204                  | 50 .806         | 51 .036         |
| 52 60%                        | 53 80%            | 54 90                     | 55 90                     | 56 180                  | 57 .802         | 58 .032         |
| 59 70%                        | 60 90%            | 61 69                     | 62 69                     | 63 138                  | 64 .807         | 65 .025         |

66 **Allocation ratio: 30% and 70% (3:7)**

67 20% difference

| 68 Proportion reporting<br>COI |                   | 69 Sample size<br>group 1 | 70 Sample size<br>group 2 | 71 Sample size<br>total | 72 Actual power | 73 Actual alpha |
|--------------------------------|-------------------|---------------------------|---------------------------|-------------------------|-----------------|-----------------|
| 74 Low impact                  | 75 High<br>impact |                           |                           |                         |                 |                 |
| 76 10%                         | 77 30%            | 78 105                    | 79 44                     | 80 149                  | 81 .815         | 82 .038         |
| 83 20%                         | 84 40%            | 85 141                    | 86 59                     | 87 200                  | 88 .807         | 89 .040         |
| 90 30%                         | 91 50%            | 92 165                    | 93 69                     | 94 234                  | 95 .801         | 96 .045         |
| 97 40%                         | 98 60%            | 99 168                    | 100 71                    | 101 239                 | 102 .805        | 103 .043        |
| 104 50%                        | 105 70%           | 106 166                   | 107 70                    | 108 236                 | 109 .864        | 110 .042        |
| 111 60%                        | 112 80%           | 113 148                   | 114 62                    | 115 210                 | 116 .802        | 117 .040        |
| 118 70%                        | 119 90%           | 120 133                   | 121 47                    | 122 160                 | 123 .802        | 124 .035        |

**eTable1.** Detailed characteristics of included meta-analyses**eTable1.** Detailed characteristics of included meta-analyses

| First Author                      | Year | Journal                                 | 2017 Impact Factor | Specialty Area               | Meta-analysis Funding source(s) | Number of Meta-analysis Authors with Industry Financial Ties / Number of Meta-analysis Authors <sup>a</sup> | Number of drug RCTs Included | Publication Dates of included drug RCTs | Population                                                                  | Drug Intervention(s)                                                                                                                  | Comparison Arm(s)                                               |
|-----------------------------------|------|-----------------------------------------|--------------------|------------------------------|---------------------------------|-------------------------------------------------------------------------------------------------------------|------------------------------|-----------------------------------------|-----------------------------------------------------------------------------|---------------------------------------------------------------------------------------------------------------------------------------|-----------------------------------------------------------------|
| <b>Cochrane Reviews (n = 107)</b> |      |                                         |                    |                              |                                 |                                                                                                             |                              |                                         |                                                                             |                                                                                                                                       |                                                                 |
| Abdel-Rahman <sup>1</sup>         | 2018 | Cochrane Database of Systematic Reviews | 6.8                | Medicine, General & Internal | Non-industry                    | 0/3                                                                                                         | 7                            | 2004-2016                               | Adults (19 years and over) with advanced biliary tract carcinomas           | Gemcitabine, vandetanib, S-1 (tegafur + gimeracil + oteracil), gemcitabine + oxaliplatin, 5-fluorouracil + folinic acid, capecitabine | Best supportive care, 5-fluorouracil + cisplatin + radiotherapy |
| Adams <sup>2</sup>                | 2018 | Cochrane Database of Systematic Reviews | 6.8                | Medicine, General & Internal | Non-industry                    | 0/4                                                                                                         | 36                           | 1994-2012                               | Participants with or without evidence of cardiovascular disease             | Fluvastatin                                                                                                                           | Placebo                                                         |
| Agabio <sup>3</sup>               | 2018 | Cochrane Database of Systematic Reviews | 6.8                | Medicine, General & Internal | Non-industry                    | 0/3                                                                                                         | 27                           | 1969-2015                               | People with co-occurring depression and alcohol dependence                  | Antidepressants - 16 types, diazepam, memantine                                                                                       | Placebo, psychotherapy                                          |
| Al-Shahi Salman <sup>4</sup>      | 2018 | Cochrane Database of Systematic Reviews | 6.8                | Medicine, General & Internal | Not reported                    | 0/5                                                                                                         | 11 <sup>b</sup>              | 1999-2015                               | Adults (16 years and over) with acute spontaneous intracerebral haemorrhage | Blood clotting factors, antifibrinolytic drugs                                                                                        | Placebo, open control, fresh frozen plasma                      |
| Alabed <sup>5</sup>               | 2018 | Cochrane Database of Systematic Reviews | 6.8                | Medicine, General & Internal | Non-industry                    | 0/4                                                                                                         | 11                           | 1976-2008                               | Patients with antipsychotic-induced tardive dyskinesia (TD)                 | Gamma-aminobutyric acid agonists - 6 types                                                                                            | Placebo                                                         |
| Allegretti <sup>6</sup>           | 2017 | Cochrane Database of Systematic Reviews | 6.8                | Medicine, General & Internal | No funding                      | 3/8                                                                                                         | 8                            | 1998-2016                               | Patients with hepatorenal syndrome                                          | Terlipressin, terlipressin + albumin                                                                                                  | Placebo, no intervention, albumin                               |
| Arechabala <sup>7</sup>           | 2018 | Cochrane Database of Systematic Reviews | 6.8                | Medicine, General & Internal | Non-industry                    | 0/7                                                                                                         | 37                           | 1998-2017                               | Patients undergoing haemodialysis using a central venous catheter           | Antibiotic antimicrobial lock solutions - 11 types, non-antibiotic antimicrobial lock                                                 | Heparin, saline                                                 |

|    |                        |      |                                         |     |                              |              |     |                 |           |                                                                                                                 |  |                                                                                                                                                                                                                                                                               |                                                      |
|----|------------------------|------|-----------------------------------------|-----|------------------------------|--------------|-----|-----------------|-----------|-----------------------------------------------------------------------------------------------------------------|--|-------------------------------------------------------------------------------------------------------------------------------------------------------------------------------------------------------------------------------------------------------------------------------|------------------------------------------------------|
| 1  |                        |      |                                         |     |                              |              |     |                 |           |                                                                                                                 |  |                                                                                                                                                                                                                                                                               |                                                      |
| 2  |                        |      |                                         |     |                              |              |     |                 |           |                                                                                                                 |  |                                                                                                                                                                                                                                                                               |                                                      |
| 3  |                        |      |                                         |     |                              |              |     |                 |           |                                                                                                                 |  |                                                                                                                                                                                                                                                                               |                                                      |
| 4  |                        |      |                                         |     |                              |              |     |                 |           |                                                                                                                 |  | solutions - 10 types,                                                                                                                                                                                                                                                         |                                                      |
| 5  |                        |      |                                         |     |                              |              |     |                 |           |                                                                                                                 |  | antibiotic + non-antibiotic                                                                                                                                                                                                                                                   |                                                      |
| 6  |                        |      |                                         |     |                              |              |     |                 |           |                                                                                                                 |  | antimicrobial lock                                                                                                                                                                                                                                                            |                                                      |
| 7  |                        |      |                                         |     |                              |              |     |                 |           |                                                                                                                 |  | solutions - 3 types                                                                                                                                                                                                                                                           |                                                      |
| 8  |                        |      |                                         |     |                              |              |     |                 |           |                                                                                                                 |  | Valproate, carbamazepine,                                                                                                                                                                                                                                                     |                                                      |
| 9  |                        |      |                                         |     |                              |              |     |                 |           |                                                                                                                 |  | lithium, pregabalin,                                                                                                                                                                                                                                                          |                                                      |
| 10 |                        |      |                                         |     |                              |              |     |                 |           |                                                                                                                 |  | captodiame, paroxetine,                                                                                                                                                                                                                                                       |                                                      |
| 11 |                        |      |                                         |     |                              |              |     |                 |           |                                                                                                                 |  | tricyclic antidepressants - 4                                                                                                                                                                                                                                                 |                                                      |
| 12 |                        |      |                                         |     |                              |              |     |                 |           |                                                                                                                 |  | types, alpidem, buspirone,                                                                                                                                                                                                                                                    |                                                      |
| 13 | Baandrup <sup>8</sup>  | 2018 | Cochrane Database of Systematic Reviews | 6.8 | Medicine, General & Internal | No funding   | 1/6 | 33 <sup>c</sup> | 1981-2016 | Adult (18 years and over) chronic benzodiazepine users                                                          |  | progesterone, magnesium aspartate, bromazepam, cyamemazine, zopiclone, flunitrazepam                                                                                                                                                                                          | Placebo, no intervention                             |
| 14 |                        |      |                                         |     |                              |              |     |                 |           |                                                                                                                 |  |                                                                                                                                                                                                                                                                               |                                                      |
| 15 |                        |      |                                         |     |                              |              |     |                 |           |                                                                                                                 |  |                                                                                                                                                                                                                                                                               |                                                      |
| 16 |                        |      |                                         |     |                              |              |     |                 |           |                                                                                                                 |  |                                                                                                                                                                                                                                                                               |                                                      |
| 17 | Bala <sup>9</sup>      | 2018 | Cochrane Database of Systematic Reviews | 6.8 | Medicine, General & Internal | Non-industry | 3/6 | 9               | 1997-2016 | Individuals with antiphospholipid antibodies and no history of thrombosis                                       |  | Aspirin + anticoagulants, aspirin, aspirin + low molecular weight heparin                                                                                                                                                                                                     | Placebo, immunoglobulin, unfractionated heparin      |
| 18 |                        |      |                                         |     |                              |              |     |                 |           |                                                                                                                 |  |                                                                                                                                                                                                                                                                               |                                                      |
| 19 |                        |      |                                         |     |                              |              |     |                 |           |                                                                                                                 |  |                                                                                                                                                                                                                                                                               |                                                      |
| 20 |                        |      |                                         |     |                              |              |     |                 |           |                                                                                                                 |  |                                                                                                                                                                                                                                                                               |                                                      |
| 21 |                        |      |                                         |     |                              |              |     |                 |           |                                                                                                                 |  |                                                                                                                                                                                                                                                                               |                                                      |
| 22 | Barbato <sup>10</sup>  | 2018 | Cochrane Database of Systematic Reviews | 6.8 | Medicine, General & Internal | Non-industry | 0/3 | 4 <sup>d</sup>  | 2000-2012 | Heterosexual adult couples (18 years or more) with a partner having a clinical diagnosis of depressive disorder |  | Antidepressants - 9 types                                                                                                                                                                                                                                                     | Couples therapy                                      |
| 23 |                        |      |                                         |     |                              |              |     |                 |           |                                                                                                                 |  |                                                                                                                                                                                                                                                                               |                                                      |
| 24 |                        |      |                                         |     |                              |              |     |                 |           |                                                                                                                 |  |                                                                                                                                                                                                                                                                               |                                                      |
| 25 | Bergman <sup>11</sup>  | 2018 | Cochrane Database of Systematic Reviews | 6.8 | Medicine, General & Internal | Non-industry | 0/3 | 4               | 1981-1997 | Psychiatric patients with antipsychotic-induced tardive dyskinesia                                              |  | Benzodiazepines - 3 types<br>Tricyclic antidepressants (TCAs), selective serotonin reuptake inhibitors (SSRIs), monoamine oxidase inhibitors (MAOIs), serotonin-norepinephrine reuptake inhibitors (SNRIs), norepinephrine reuptake inhibitors (NRIs), nefazodone, ritanserin | Placebo, usual care                                  |
| 26 |                        |      |                                         |     |                              |              |     |                 |           |                                                                                                                 |  |                                                                                                                                                                                                                                                                               |                                                      |
| 27 |                        |      |                                         |     |                              |              |     |                 |           |                                                                                                                 |  |                                                                                                                                                                                                                                                                               |                                                      |
| 28 |                        |      |                                         |     |                              |              |     |                 |           |                                                                                                                 |  |                                                                                                                                                                                                                                                                               |                                                      |
| 29 |                        |      |                                         |     |                              |              |     |                 |           |                                                                                                                 |  |                                                                                                                                                                                                                                                                               |                                                      |
| 30 |                        |      |                                         |     |                              |              |     |                 |           |                                                                                                                 |  |                                                                                                                                                                                                                                                                               |                                                      |
| 31 |                        |      |                                         |     |                              |              |     |                 |           |                                                                                                                 |  |                                                                                                                                                                                                                                                                               |                                                      |
| 32 |                        |      |                                         |     |                              |              |     |                 |           |                                                                                                                 |  |                                                                                                                                                                                                                                                                               |                                                      |
| 33 | Bighelli <sup>12</sup> | 2018 | Cochrane Database of Systematic Reviews | 6.8 | Medicine, General & Internal | Non-industry | 2/9 | 41              | 1989-2011 | Adults (18 years and over) with panic disorder                                                                  |  |                                                                                                                                                                                                                                                                               | Placebo                                              |
| 34 |                        |      |                                         |     |                              |              |     |                 |           |                                                                                                                 |  |                                                                                                                                                                                                                                                                               |                                                      |
| 35 |                        |      |                                         |     |                              |              |     |                 |           |                                                                                                                 |  |                                                                                                                                                                                                                                                                               |                                                      |
| 36 | Birks <sup>13</sup>    | 2018 | Cochrane Database of Systematic Reviews | 6.8 | Medicine, General & Internal | Non-industry | 0/2 | 30              | 1996-2017 | People with Alzheimer's disease                                                                                 |  | Donepezil                                                                                                                                                                                                                                                                     | Placebo                                              |
| 37 |                        |      |                                         |     |                              |              |     |                 |           |                                                                                                                 |  |                                                                                                                                                                                                                                                                               |                                                      |
| 38 |                        |      |                                         |     |                              |              |     |                 |           |                                                                                                                 |  |                                                                                                                                                                                                                                                                               |                                                      |
| 39 | Boyapati <sup>14</sup> | 2018 | Cochrane Database of Systematic Reviews | 6.8 | Medicine, General & Internal | Non-industry | 3/8 | 6               | 1978-2017 | Adults (18 years and over) with quiescent Crohn's disease                                                       |  | Azathioprine, infliximab                                                                                                                                                                                                                                                      | No treatment, usual care (azathioprine + infliximab) |
| 40 |                        |      |                                         |     |                              |              |     |                 |           |                                                                                                                 |  |                                                                                                                                                                                                                                                                               |                                                      |
| 41 |                        |      |                                         |     |                              |              |     |                 |           |                                                                                                                 |  |                                                                                                                                                                                                                                                                               |                                                      |
| 42 |                        |      |                                         |     |                              |              |     |                 |           |                                                                                                                 |  |                                                                                                                                                                                                                                                                               |                                                      |
| 43 |                        |      |                                         |     |                              |              |     |                 |           |                                                                                                                 |  |                                                                                                                                                                                                                                                                               |                                                      |
| 44 |                        |      |                                         |     |                              |              |     |                 |           |                                                                                                                 |  |                                                                                                                                                                                                                                                                               |                                                      |
| 45 |                        |      |                                         |     |                              |              |     |                 |           |                                                                                                                 |  |                                                                                                                                                                                                                                                                               |                                                      |
| 46 |                        |      |                                         |     |                              |              |     |                 |           |                                                                                                                 |  |                                                                                                                                                                                                                                                                               |                                                      |
| 47 |                        |      |                                         |     |                              |              |     |                 |           |                                                                                                                 |  |                                                                                                                                                                                                                                                                               |                                                      |



|    |                            |      |             |     |                   |          |                  |                 |           |                       |                             |                        |
|----|----------------------------|------|-------------|-----|-------------------|----------|------------------|-----------------|-----------|-----------------------|-----------------------------|------------------------|
| 1  |                            |      |             |     |                   |          |                  |                 |           |                       |                             |                        |
| 2  |                            |      |             |     |                   |          |                  |                 |           |                       |                             |                        |
| 3  |                            |      | Cochrane    |     |                   |          |                  |                 |           |                       |                             |                        |
| 4  |                            |      | Database of |     |                   |          |                  |                 | Women of  |                       |                             |                        |
| 5  | Brown <sup>15</sup>        | 2018 | Systematic  | 6.8 | Medicine, General | Non-     | 0/4              | 5               | 1993-2017 | reproductive age      | Combined oral contraceptive | Placebo, leuprolide,   |
| 6  |                            |      | Reviews     |     | & Internal        | industry |                  |                 |           | with endometriosis    | pill - 3 types              | goserelin              |
| 7  |                            |      | Cochrane    |     |                   |          |                  |                 |           |                       |                             |                        |
| 8  |                            |      | Database of |     |                   |          |                  |                 |           |                       |                             |                        |
| 9  | Bruins Slot <sup>16</sup>  | 2018 | Systematic  | 6.8 | Medicine, General | Non-     | 1/2 <sup>e</sup> | 13              | 2008-2014 | Adults with atrial    | Factor Xa inhibitors - 7    | Warfarin               |
| 10 |                            |      | Reviews     |     | & Internal        | industry |                  |                 |           | fibrillation          | types                       |                        |
| 11 |                            |      |             |     |                   |          |                  |                 |           | People with           |                             |                        |
| 12 |                            |      |             |     |                   |          |                  |                 |           | schizophrenia and     |                             |                        |
| 13 |                            |      |             |     |                   |          |                  |                 |           | schizophrenia-like    |                             |                        |
| 14 |                            |      | Cochrane    |     |                   |          |                  |                 |           | disorders such as     |                             |                        |
| 15 | Bryan <sup>17</sup>        | 2017 | Systematic  | 6.8 | Medicine, General | No       | 0/3              | 20              | 1968-2007 | schizophreniform      | Zuclophenthixol             | Placebo, other drugs - |
| 16 |                            |      | Reviews     |     | & Internal        | funding  |                  |                 |           | disorder              | dihydrochloride             | 11 types               |
| 17 |                            |      |             |     |                   |          |                  |                 |           | schizo-affective      | Antifibrinolytic agents - 2 |                        |
| 18 |                            |      | Cochrane    |     |                   |          |                  |                 |           | disorder              | types, non-steroidal anti-  | Placebo, herbal        |
| 19 | Bryant-Smith <sup>18</sup> | 2018 | Systematic  | 6.8 | Medicine, General | No       | 1/4              | 13              | 1970-2016 | People with           | inflammatory drugs          | medicines,             |
| 20 |                            |      | Reviews     |     | & Internal        | funding  |                  |                 |           | heavy                 | (NSAIDs), progestogens,     | levonorgestrel         |
| 21 |                            |      |             |     |                   |          |                  |                 |           | menstrual bleeding    | ethamsylate                 | intrauterine system    |
| 22 |                            |      | Cochrane    |     |                   |          |                  |                 |           | Adults (17 years and  |                             |                        |
| 23 | Burry <sup>19</sup>        | 2018 | Systematic  | 6.8 | Medicine, General | Non-     | 0/9              | 9               | 1996-2016 | over) in non-ICU      | Antipsychotics - 5 types    | Nonantipsychotics,     |
| 24 |                            |      | Reviews     |     | & Internal        | industry |                  |                 |           | acute care settings   |                             | placebo                |
| 25 |                            |      | Cochrane    |     |                   |          |                  |                 |           | diagnosed with        |                             |                        |
| 26 | Campschroer <sup>20</sup>  | 2018 | Systematic  | 6.8 | Medicine, General | Non-     | 0/4              | 67              | 2002-2017 | delirium              | Alpha-blockers - 6 types    | Placebo, usual care    |
| 27 |                            |      | Reviews     |     | & Internal        | industry |                  |                 |           | Adult patients (18    |                             |                        |
| 28 |                            |      |             |     |                   |          |                  |                 |           | years and older)      |                             |                        |
| 29 |                            |      | Cochrane    |     |                   |          |                  |                 |           | with ureteral stone   |                             |                        |
| 30 | Candy <sup>21</sup>        | 2018 | Systematic  | 6.8 | Medicine, General | Non-     | 0/5              | 8               | 1996-2017 | disease               | Mu-opioid antagonists - 3   | Placebo                |
| 31 |                            |      | Reviews     |     | & Internal        | industry |                  |                 |           | Adults with cancer    | types                       |                        |
| 32 |                            |      | Cochrane    |     |                   |          |                  |                 |           | and adults receiving  |                             |                        |
| 33 | Chiew <sup>22</sup>        | 2018 | Systematic  | 6.8 | Medicine, General | Non-     | 0/4              | 9 <sup>f</sup>  | 1976-2014 | palliative care with  |                             |                        |
| 34 |                            |      | Reviews     |     | & Internal        | industry |                  |                 |           | opioid-induced        | Methionine, cysteamine,     | Placebo, no treatment  |
| 35 |                            |      |             |     |                   |          |                  |                 |           | bowel dysfunction     | dimercaprol, acetylcysteine |                        |
| 36 |                            |      | Cochrane    |     |                   |          |                  |                 |           | Patients with         |                             |                        |
| 37 | Das <sup>23</sup>          | 2018 | Systematic  | 6.8 | Medicine, General | Not      | 0/3              | 7               | 2010-2017 | paracetamol           | Vitamin D                   | Placebo, antibiotics   |
| 38 |                            |      | Reviews     |     | & Internal        | reported |                  |                 |           | (acetaminophen)       |                             | alone                  |
| 39 |                            |      | Cochrane    |     |                   |          |                  |                 |           | overdose              |                             |                        |
| 40 | Demicheli <sup>24</sup>    | 2018 | Systematic  | 6.8 | Medicine, General | Non-     | 1/5              | 71 <sup>g</sup> | 1969-2014 | Children aged up to   | Inactivated parenteral      | Placebo, no treatment  |
| 41 |                            |      | Reviews     |     | & Internal        | industry |                  |                 |           | five years with a     | influenza vaccine           |                        |
| 42 |                            |      |             |     |                   |          |                  |                 |           | clinical diagnosis of |                             |                        |
| 43 |                            |      |             |     |                   |          |                  |                 |           | community-acquired    |                             |                        |
| 44 |                            |      |             |     |                   |          |                  |                 |           | pneumonia (CAP)       |                             |                        |
| 45 |                            |      |             |     |                   |          |                  |                 |           | Healthy individuals   |                             |                        |
| 46 |                            |      |             |     |                   |          |                  |                 |           | (16 to 65 years) and  |                             |                        |
| 47 |                            |      |             |     |                   |          |                  |                 |           | pregnant women and    |                             |                        |
|    |                            |      |             |     |                   |          |                  |                 |           | their newborns        |                             |                        |

|     |                            |      |             |     |                   |          |     |    |           |                       |                             |                        |
|-----|----------------------------|------|-------------|-----|-------------------|----------|-----|----|-----------|-----------------------|-----------------------------|------------------------|
| 1   |                            |      |             |     |                   |          |     |    |           |                       |                             |                        |
| 2   |                            |      |             |     |                   |          |     |    |           |                       |                             |                        |
| 3   |                            |      | Cochrane    |     |                   |          |     |    |           |                       |                             |                        |
| 4   |                            |      | Database of |     |                   |          |     |    |           |                       |                             |                        |
| 5   | Demicheli <sup>25</sup>    | 2018 | Systematic  | 6.8 | Medicine, General | Non-     | 1/7 | 8  | 1969-2004 | Elderly participants  | Influenza vaccines          | Placebo                |
| 6   |                            |      | Reviews     |     | & Internal        | industry |     |    |           | (65 years and over)   | Fondaparinux,               |                        |
| 7   |                            |      |             |     |                   |          |     |    |           |                       | rivaroxaban, low molecular  |                        |
| 8   |                            |      |             |     |                   |          |     |    |           |                       | weight heparin, non-        |                        |
| 9   |                            |      |             |     |                   |          |     |    |           |                       | steroidal anti-inflammatory |                        |
| 10  |                            |      |             |     |                   |          |     |    |           |                       | drugs, vasotonin,           |                        |
| 11  |                            |      |             |     |                   |          |     |    |           |                       | sulodexide,                 |                        |
| 12  |                            |      | Cochrane    |     |                   |          |     |    |           |                       | heparansulphate, vitamin K  |                        |
| 13  |                            |      | Database of |     |                   |          |     |    |           |                       | antagonists, enzyme         |                        |
| 14  | Di Nisio <sup>26</sup>     | 2018 | Systematic  | 6.8 | Medicine, General | Non-     | 2/3 | 32 | 1970-2017 | Patients with         | therapy, unfractionated     | Placebo, elastic       |
| 15  |                            |      | Reviews     |     | & Internal        | industry |     |    |           | superficial           | heparin, heparin calcium,   | stockings              |
| 16  |                            |      | Cochrane    |     |                   |          |     |    |           | thrombophlebitis of   | defibrotide                 |                        |
| 17  | El-Sayeh <sup>27</sup>     | 2018 | Database of | 6.8 | Medicine, General | Non-     | 0/4 | 10 | 1973-2010 | of a thrombus in a    |                             |                        |
| 18  |                            |      | Systematic  |     | & Internal        | industry |     |    |           | superficial vein      | Noradrenergic drugs - 2     | Placebo                |
| 19  |                            |      | Reviews     |     |                   |          |     |    |           | Patients with         | types, dopaminergic drugs   |                        |
| 20  |                            |      |             |     |                   |          |     |    |           | antipsychotic-        | - 7 types                   |                        |
| 21  |                            |      |             |     |                   |          |     |    |           | induced tardive       |                             |                        |
| 22  |                            |      |             |     |                   |          |     |    |           | dyskinesia            |                             |                        |
| 23  |                            |      |             |     |                   |          |     |    |           | People of all ages on |                             |                        |
| 24  |                            |      |             |     |                   |          |     |    |           | continuous vitamin    |                             |                        |
| 25  |                            |      |             |     |                   |          |     |    |           | K antagonist (VKA)    |                             |                        |
| 26  |                            |      |             |     |                   |          |     |    |           | or direct oral        |                             |                        |
| 27  | Engelen <sup>28</sup>      | 2018 | Systematic  | 6.8 | Medicine, General | Non-     | 0/5 | 3  | 1989-2015 | anticoagulant         |                             | Usual care (surgical   |
| 28  |                            |      | Reviews     |     | & Internal        | industry |     |    |           | (DOAC) treatment      | Antifibrinolytic agents - 2 | treatment), usual care |
| 29  |                            |      |             |     |                   |          |     |    |           | undergoing an oral    | types                       | (surgical treatment) + |
| 30  |                            |      |             |     |                   |          |     |    |           | or dental procedure   | Selective serotonin         | placebo                |
| 31  |                            |      |             |     |                   |          |     |    |           |                       | reuptake inhibitors (SSRIs) |                        |
| 32  |                            |      |             |     |                   |          |     |    |           |                       | - 4 types, tricyclic        |                        |
| 33  |                            |      |             |     |                   |          |     |    |           |                       | antidepressants (TCAs) - 2  |                        |
| 34  | Eshun-Wilson <sup>29</sup> | 2018 | Systematic  | 6.8 | Medicine, General | Non-     | 1/6 | 10 | 1994-2014 | Adults (18 years and  |                             | Placebo, mirtazapine   |
| 35  |                            |      | Reviews     |     | & Internal        | industry |     |    |           | over) living with     |                             |                        |
| 36  |                            |      |             |     |                   |          |     |    |           | HIV and depression    |                             |                        |
| 37  |                            |      |             |     |                   |          |     |    |           | People with           |                             |                        |
| 38  |                            |      |             |     |                   |          |     |    |           | antipsychotic-        | Calcium channel blockers -  |                        |
| 39  |                            |      |             |     |                   |          |     |    |           | induced tardive       | 3 types                     |                        |
| 40  | Essali <sup>30</sup>       | 2018 | Systematic  | 6.8 | Medicine, General | Non-     | 0/4 | 3  | 1992-1997 | dyskinesia            | Selective serotonin         | Placebo                |
| 41  |                            |      | Reviews     |     | & Internal        | industry |     |    |           |                       | reuptake inhibitors - 4     |                        |
| 42  |                            |      |             |     |                   |          |     |    |           |                       | types; tricyclic            |                        |
| 43  |                            |      |             |     |                   |          |     |    |           |                       | antidepressants - 3 types;  |                        |
| 44  |                            |      |             |     |                   |          |     |    |           |                       | other antidepressants - 6   |                        |
| 45  |                            |      |             |     |                   |          |     |    |           |                       | types                       | Placebo, insomnia      |
| 46  |                            |      |             |     |                   |          |     |    |           |                       |                             | medication - 2 types   |
| 47  |                            |      |             |     |                   |          |     |    |           |                       |                             |                        |
| 48  |                            |      |             |     |                   |          |     |    |           |                       |                             |                        |
| 49  |                            |      |             |     |                   |          |     |    |           |                       |                             |                        |
| 50  |                            |      |             |     |                   |          |     |    |           |                       |                             |                        |
| 51  |                            |      |             |     |                   |          |     |    |           |                       |                             |                        |
| 52  |                            |      |             |     |                   |          |     |    |           |                       |                             |                        |
| 53  |                            |      |             |     |                   |          |     |    |           |                       |                             |                        |
| 54  |                            |      |             |     |                   |          |     |    |           |                       |                             |                        |
| 55  |                            |      |             |     |                   |          |     |    |           |                       |                             |                        |
| 56  |                            |      |             |     |                   |          |     |    |           |                       |                             |                        |
| 57  |                            |      |             |     |                   |          |     |    |           |                       |                             |                        |
| 58  |                            |      |             |     |                   |          |     |    |           |                       |                             |                        |
| 59  |                            |      |             |     |                   |          |     |    |           |                       |                             |                        |
| 60  |                            |      |             |     |                   |          |     |    |           |                       |                             |                        |
| 61  |                            |      |             |     |                   |          |     |    |           |                       |                             |                        |
| 62  |                            |      |             |     |                   |          |     |    |           |                       |                             |                        |
| 63  |                            |      |             |     |                   |          |     |    |           |                       |                             |                        |
| 64  |                            |      |             |     |                   |          |     |    |           |                       |                             |                        |
| 65  |                            |      |             |     |                   |          |     |    |           |                       |                             |                        |
| 66  |                            |      |             |     |                   |          |     |    |           |                       |                             |                        |
| 67  |                            |      |             |     |                   |          |     |    |           |                       |                             |                        |
| 68  |                            |      |             |     |                   |          |     |    |           |                       |                             |                        |
| 69  |                            |      |             |     |                   |          |     |    |           |                       |                             |                        |
| 70  |                            |      |             |     |                   |          |     |    |           |                       |                             |                        |
| 71  |                            |      |             |     |                   |          |     |    |           |                       |                             |                        |
| 72  |                            |      |             |     |                   |          |     |    |           |                       |                             |                        |
| 73  |                            |      |             |     |                   |          |     |    |           |                       |                             |                        |
| 74  |                            |      |             |     |                   |          |     |    |           |                       |                             |                        |
| 75  |                            |      |             |     |                   |          |     |    |           |                       |                             |                        |
| 76  |                            |      |             |     |                   |          |     |    |           |                       |                             |                        |
| 77  |                            |      |             |     |                   |          |     |    |           |                       |                             |                        |
| 78  |                            |      |             |     |                   |          |     |    |           |                       |                             |                        |
| 79  |                            |      |             |     |                   |          |     |    |           |                       |                             |                        |
| 80  |                            |      |             |     |                   |          |     |    |           |                       |                             |                        |
| 81  |                            |      |             |     |                   |          |     |    |           |                       |                             |                        |
| 82  |                            |      |             |     |                   |          |     |    |           |                       |                             |                        |
| 83  |                            |      |             |     |                   |          |     |    |           |                       |                             |                        |
| 84  |                            |      |             |     |                   |          |     |    |           |                       |                             |                        |
| 85  |                            |      |             |     |                   |          |     |    |           |                       |                             |                        |
| 86  |                            |      |             |     |                   |          |     |    |           |                       |                             |                        |
| 87  |                            |      |             |     |                   |          |     |    |           |                       |                             |                        |
| 88  |                            |      |             |     |                   |          |     |    |           |                       |                             |                        |
| 89  |                            |      |             |     |                   |          |     |    |           |                       |                             |                        |
| 90  |                            |      |             |     |                   |          |     |    |           |                       |                             |                        |
| 91  |                            |      |             |     |                   |          |     |    |           |                       |                             |                        |
| 92  |                            |      |             |     |                   |          |     |    |           |                       |                             |                        |
| 93  |                            |      |             |     |                   |          |     |    |           |                       |                             |                        |
| 94  |                            |      |             |     |                   |          |     |    |           |                       |                             |                        |
| 95  |                            |      |             |     |                   |          |     |    |           |                       |                             |                        |
| 96  |                            |      |             |     |                   |          |     |    |           |                       |                             |                        |
| 97  |                            |      |             |     |                   |          |     |    |           |                       |                             |                        |
| 98  |                            |      |             |     |                   |          |     |    |           |                       |                             |                        |
| 99  |                            |      |             |     |                   |          |     |    |           |                       |                             |                        |
| 100 |                            |      |             |     |                   |          |     |    |           |                       |                             |                        |

1  
2  
3  
4  
5  
6  
7  
8  
9  
10  
11  
12  
13  
14  
15  
16  
17  
18  
19  
20  
21  
22  
23  
24  
25  
26  
27  
28  
29  
30  
31  
32  
33  
34  
35  
36  
37  
38  
39  
40  
41  
42  
43  
44  
45  
46  
47

|                                  |      |                                                                                                      |     |                                 |                  |      |                 |                          |                                                                                                                                                                                    |                                                                                                                                                |                                                                                                                                                                                                   |
|----------------------------------|------|------------------------------------------------------------------------------------------------------|-----|---------------------------------|------------------|------|-----------------|--------------------------|------------------------------------------------------------------------------------------------------------------------------------------------------------------------------------|------------------------------------------------------------------------------------------------------------------------------------------------|---------------------------------------------------------------------------------------------------------------------------------------------------------------------------------------------------|
|                                  |      |                                                                                                      |     |                                 |                  |      |                 |                          |                                                                                                                                                                                    |                                                                                                                                                | followed by<br>intrauterine<br>insemination,<br>laparoscopic ovarian<br>drilling, follicle-<br>stimulating hormone,<br>anastrozole<br>Sulfadoxine-<br>pyrimethamine,<br>cotrimoxazole,<br>placebo |
| González <sup>34</sup>           | 2018 | Cochrane<br>Database of<br>Systematic<br>Reviews                                                     | 6.8 | Medicine, General<br>& Internal | Non-<br>industry | 0/6  | 6               | 1994-2014                | Pregnant women<br>living in malaria-<br>endemic areas<br>Adult women with<br>moderate or severe<br>cervical<br>intraepithelial<br>neoplasia (CIN)                                  | Mefloquine                                                                                                                                     |                                                                                                                                                                                                   |
| Grabosch <sup>35</sup>           | 2018 | Cochrane<br>Database of<br>Systematic<br>Reviews<br>Cochrane<br>Database of<br>Systematic<br>Reviews | 6.8 | Medicine, General<br>& Internal | Non-<br>industry | 0/3  | 3               | 2006-2017                | Adults and children<br>being treated for<br>falciparum malaria<br>Pregnant women<br>who were about to<br>receive a cesarean<br>delivery                                            | Non-steroidal anti-<br>inflammatory agents<br>(NSAIDs) - 2 types                                                                               | Placebo                                                                                                                                                                                           |
| Graves <sup>36</sup>             | 2018 | Cochrane<br>Database of<br>Systematic<br>Reviews<br>Cochrane<br>Database of<br>Systematic<br>Reviews | 6.8 | Medicine, General<br>& Internal | Non-<br>industry | 0/4  | 24 <sup>b</sup> | 1981-2017                | Adults and children<br>being treated for<br>falciparum malaria<br>Pregnant women<br>who were about to<br>receive a cesarean<br>delivery                                            | Primaquine                                                                                                                                     | Usual treatment,<br>bulaquine                                                                                                                                                                     |
| Haas <sup>37</sup>               | 2018 | Cochrane<br>Database of<br>Systematic<br>Reviews<br>Cochrane<br>Database of<br>Systematic<br>Reviews | 6.8 | Medicine, General<br>& Internal | Non-<br>industry | 0/4  | 11              | 1997-2017                | Adults and children<br>being treated for<br>falciparum malaria<br>Pregnant women<br>who were about to<br>receive a cesarean<br>delivery                                            | Antiseptic solutions - 3<br>types                                                                                                              | Placebo, no treatment                                                                                                                                                                             |
| Hakoum <sup>38</sup>             | 2018 | Cochrane<br>Database of<br>Systematic<br>Reviews                                                     | 6.8 | Medicine, General<br>& Internal | Non-<br>industry | 0/10 | 15              | 1991-2009                | People with cancer<br>and venous<br>thromboembolism                                                                                                                                | Low molecular weight<br>heparin, unfractioned<br>heparin                                                                                       | Fondaparinux<br>Placebo, no treatment,<br>alternative therapies -<br>7 types, other drug<br>comparators - 6 types,<br>other non-drug<br>comparators - 4 types                                     |
| Heras-<br>Mosteiro <sup>39</sup> | 2017 | Cochrane<br>Database of<br>Systematic<br>Reviews<br>Cochrane<br>Database of<br>Systematic<br>Reviews | 6.8 | Medicine, General<br>& Internal | Non-<br>industry | 0/10 | 89              | 1990-2015                | Immunocompetent<br>patients with<br>localised Old World<br>cutaneous<br>leishmaniasis<br>People with<br>esophageal or<br>gastroesophageal<br>junction cancer                       | Antimonials – 2 types,<br>non-antimonials – 22 types<br>Chemotherapy, targeted<br>therapy, EGFR-targeting<br>agents, cetuximab,<br>ramucirumab | Best supportive care,<br>unspecified control                                                                                                                                                      |
| Janmaat <sup>40</sup>            | 2017 | Cochrane<br>Database of<br>Systematic<br>Reviews<br>Cochrane<br>Database of<br>Systematic<br>Reviews | 6.8 | Medicine, General<br>& Internal | Non-<br>industry | 0/8  | 41              | 1980-2015                | Healthy children (15<br>years and under)<br>Middle-aged and<br>older men (40 or<br>over) with lower<br>urinary tract<br>symptoms as a result<br>of benign prostatic<br>hyperplasia | Influenza vaccine - 2 types                                                                                                                    | Placebo, no<br>intervention                                                                                                                                                                       |
| Jefferson <sup>41</sup>          | 2018 | Cochrane<br>Database of<br>Systematic<br>Reviews                                                     | 6.8 | Medicine, General<br>& Internal | Non-<br>industry | 1/4  | 41              | 1971-2016                | Healthy children (15<br>years and under)<br>Middle-aged and<br>older men (40 or<br>over) with lower<br>urinary tract<br>symptoms as a result<br>of benign prostatic<br>hyperplasia | Influenza vaccine - 2 types                                                                                                                    | Placebo, no<br>intervention                                                                                                                                                                       |
| Jung <sup>42</sup>               | 2017 | Cochrane<br>Database of<br>Systematic<br>Reviews                                                     | 6.8 | Medicine, General<br>& Internal | Non-<br>industry | 0/6  | 19              | 2006-<br>Unpublishe<br>d | Healthy children (15<br>years and under)<br>Middle-aged and<br>older men (40 or<br>over) with lower<br>urinary tract<br>symptoms as a result<br>of benign prostatic<br>hyperplasia | Silodosin, tamsulosin,<br>naftopidil, and alfuzosin                                                                                            | Placebo                                                                                                                                                                                           |

|    |                        |      |             |     |                   |          |      |    |           |                     |                           |                       |
|----|------------------------|------|-------------|-----|-------------------|----------|------|----|-----------|---------------------|---------------------------|-----------------------|
| 1  |                        |      |             |     |                   |          |      |    |           |                     |                           |                       |
| 2  |                        |      |             |     |                   |          |      |    |           |                     |                           |                       |
| 3  |                        |      | Cochrane    |     |                   |          |      |    |           |                     |                           |                       |
| 4  |                        |      | Database of |     |                   |          |      |    |           |                     |                           |                       |
| 5  | Kaempfen <sup>43</sup> | 2018 | Systematic  | 6.8 | Medicine, General | Non-     | 0/4  | 3  | 2013-2017 | Preterm infants     | Propranolol               | Placebo, no treatment |
| 6  |                        |      | Reviews     |     | & Internal        | industry |      |    |           |                     |                           |                       |
| 7  |                        |      | Cochrane    |     |                   |          |      |    |           |                     |                           |                       |
| 8  |                        |      | Database of |     |                   |          |      |    |           |                     |                           |                       |
| 9  | Kahale <sup>44</sup>   | 2017 | Systematic  | 6.8 | Medicine, General | Non-     | 0/10 | 7  | 1979-2012 | Ambulatory people   | Warfarin, apixaban        | Placebo, no treatment |
| 10 |                        |      | Reviews     |     | & Internal        | industry |      |    |           | with cancer         |                           |                       |
| 11 |                        |      | Cochrane    |     |                   |          |      |    |           |                     |                           |                       |
| 12 |                        |      | Database of |     |                   |          |      |    |           | People with cancer  |                           |                       |
| 13 |                        |      | Systematic  | 6.8 | Medicine, General | Non-     | 0/10 | 13 | 1990-2013 | and central venous  | Anticoagulant - 6 types   | Placebo, no treatment |
| 14 |                        |      | Reviews     |     | & Internal        | industry |      |    |           | catheters           | Vitamin K antagonist - 2  |                       |
| 15 |                        |      | Cochrane    |     |                   |          |      |    |           |                     | types, direct oral        |                       |
| 16 |                        |      | Database of |     |                   |          |      |    |           | People with cancer  | anticoagulant - 4 types;  |                       |
| 17 | Kahale <sup>46</sup>   | 2018 | Systematic  | 6.8 | Medicine, General | Non-     | 0/11 | 16 | 2001-2018 | and venous          | low molecular weight      | Anticoagulants        |
| 18 |                        |      | Reviews     |     | & Internal        | industry |      |    |           | thromboembolism     | heparin - 4 types         |                       |
| 19 |                        |      | Cochrane    |     |                   |          |      |    |           |                     |                           |                       |
| 20 |                        |      | Database of |     |                   |          |      |    |           |                     |                           |                       |
| 21 |                        |      | Systematic  |     |                   |          |      |    |           |                     |                           |                       |
| 22 | Kapur <sup>47</sup>    | 2018 | Reviews     | 6.8 | Medicine, General | Non-     | 3/5  | 7  | 1992-2012 | Children and adults | Corticosteroids - 3 types | Placebo, no treatment |
| 23 |                        |      | Cochrane    |     | & Internal        | industry |      |    |           | with bronchiectasis |                           |                       |
| 24 |                        |      | Database of |     |                   |          |      |    |           |                     |                           |                       |
| 25 |                        |      | Systematic  |     |                   |          |      |    |           |                     |                           |                       |
| 26 |                        |      | Reviews     |     |                   |          |      |    |           |                     |                           |                       |
| 27 |                        |      | Cochrane    |     |                   |          |      |    |           |                     |                           |                       |
| 28 |                        |      | Database of |     |                   |          |      |    |           |                     |                           |                       |
| 29 |                        |      | Systematic  |     |                   |          |      |    |           |                     |                           |                       |
| 30 |                        |      | Reviews     |     |                   |          |      |    |           |                     |                           |                       |
| 31 |                        |      | Cochrane    |     |                   |          |      |    |           |                     |                           |                       |
| 32 |                        |      | Database of |     |                   |          |      |    |           |                     |                           |                       |
| 33 |                        |      | Systematic  |     |                   |          |      |    |           |                     |                           |                       |
| 34 |                        |      | Reviews     |     |                   |          |      |    |           |                     |                           |                       |
| 35 |                        |      | Cochrane    |     |                   |          |      |    |           |                     |                           |                       |
| 36 |                        |      | Database of |     |                   |          |      |    |           |                     |                           |                       |
| 37 |                        |      | Systematic  |     |                   |          |      |    |           |                     |                           |                       |
| 38 |                        |      | Reviews     |     |                   |          |      |    |           |                     |                           |                       |
| 39 |                        |      | Cochrane    |     |                   |          |      |    |           |                     |                           |                       |
| 40 |                        |      | Database of |     |                   |          |      |    |           |                     |                           |                       |
| 41 |                        |      | Systematic  |     |                   |          |      |    |           |                     |                           |                       |
| 42 |                        |      | Reviews     |     |                   |          |      |    |           |                     |                           |                       |
| 43 |                        |      | Cochrane    |     |                   |          |      |    |           |                     |                           |                       |
| 44 |                        |      | Database of |     |                   |          |      |    |           |                     |                           |                       |
| 45 |                        |      | Systematic  |     |                   |          |      |    |           |                     |                           |                       |
| 46 |                        |      | Reviews     |     |                   |          |      |    |           |                     |                           |                       |
| 47 |                        |      | Cochrane    |     |                   |          |      |    |           |                     |                           |                       |

|    |                          |      |             |     |                   |                      |      |    |           |                      |                            |                         |
|----|--------------------------|------|-------------|-----|-------------------|----------------------|------|----|-----------|----------------------|----------------------------|-------------------------|
| 1  |                          |      |             |     |                   |                      |      |    |           |                      |                            |                         |
| 2  |                          |      |             |     |                   |                      |      |    |           |                      |                            |                         |
| 3  |                          |      | Systematic  |     |                   |                      |      |    |           |                      | selective progesterone-    |                         |
| 4  |                          |      | Reviews     |     |                   |                      |      |    |           |                      | receptor modulators        |                         |
| 5  |                          |      | Cochrane    |     |                   |                      |      |    |           |                      |                            |                         |
| 6  |                          |      | Database of |     |                   |                      |      |    |           |                      |                            | 0.9% sodium chloride    |
| 7  | López-Briz <sup>54</sup> | 2018 | Systematic  | 6.8 | Medicine, General | Non-                 | 0/6  | 11 | 2002-2015 | Adults with central  | Heparin                    | (normal saline          |
| 8  |                          |      | Reviews     |     | & Internal        | industry             |      |    |           | venous catheters     |                            | solution)               |
| 9  |                          |      | Cochrane    |     |                   |                      |      |    |           | Children (18 years   |                            |                         |
| 10 |                          |      | Database of |     |                   |                      |      |    |           | and under) with      |                            |                         |
| 11 | Marchant <sup>55</sup>   | 2018 | Systematic  | 6.8 | Medicine, General | Non-                 | 2/4  | 3  | 1993-2012 | prolonged wet        | Antibiotics - 2 types      | Placebo, no treatment   |
| 12 |                          |      | Reviews     |     | & Internal        | industry             |      |    |           | cough (longer than   |                            |                         |
| 13 |                          |      | Cochrane    |     |                   |                      |      |    |           | 10 days)             |                            |                         |
| 14 | Matar <sup>56</sup>      | 2018 | Database of | 6.8 | Medicine, General | Non-                 | 0/3  | 7  | 1963-1999 | Patients with        | Fluphenazine               | Placebo                 |
| 15 |                          |      | Systematic  |     | & Internal        | industry             |      |    |           | schizophrenia        |                            |                         |
| 16 |                          |      | Reviews     |     |                   |                      |      |    |           |                      |                            |                         |
| 17 | Matar <sup>57</sup>      | 2018 | Cochrane    | 6.8 | Medicine, General | Non-                 | 0/11 | 20 | 1986-2018 | People with solid or | Low-molecular weight       | Unfractionated heparin  |
| 18 |                          |      | Database of |     | & Internal        | industry             |      |    |           | hematologic cancer   | heparin (LMWH) - 10        | (UFH), fondaparinux     |
| 19 |                          |      | Systematic  |     |                   |                      |      |    |           | undergoing surgery   | types                      |                         |
| 20 | McNicol <sup>58</sup>    | 2018 | Reviews     | 6.8 | Medicine, General | Non-                 | 1/3  | 13 | 1992-2016 | Postoperative        | Ketorolac                  | Placebo, opioid         |
| 21 |                          |      | Cochrane    |     | & Internal        | industry             |      |    |           | paediatric patients  |                            |                         |
| 22 |                          |      | Database of |     |                   |                      |      |    |           | (17 years and under) |                            |                         |
| 23 |                          |      | Systematic  |     |                   |                      |      |    |           | Children (16 years   |                            |                         |
| 24 |                          |      | Reviews     |     |                   |                      |      |    |           | and under)           |                            |                         |
| 25 | McTague <sup>59</sup>    | 2018 | Cochrane    | 6.8 | Medicine, General | Non-                 | 0/3  | 18 | 1995-2014 | presenting to a      | Lorazepam                  | Diazepam +              |
| 26 |                          |      | Database of |     | & Internal        | industry             |      |    |           | hospital or          |                            | phenytoin, diazepam,    |
| 27 |                          |      | Systematic  |     |                   |                      |      |    |           | emergency            |                            | paraldehyde,            |
| 28 |                          |      | Reviews     |     |                   |                      |      |    |           | department in an     |                            | midazolam               |
| 29 | Mhaskar <sup>60</sup>    | 2017 | Database of | 6.8 | Medicine, General | Non-                 | 0/4  | 24 | 1982-2015 | acute tonic-clonic   |                            |                         |
| 30 |                          |      | Systematic  |     | & Internal        | industry             |      |    |           | convulsion           |                            |                         |
| 31 |                          |      | Reviews     |     |                   |                      |      |    |           |                      |                            |                         |
| 32 | Milligan <sup>61</sup>   | 2018 | Cochrane    | 6.8 | Medicine, General | Non-                 | 0/4  | 18 | 1980-2016 | Patients with        | Bisphosphonates - 5 types  | Placebo, no treatment - |
| 33 |                          |      | Database of |     | & Internal        | industry             |      |    |           | multiple myeloma     |                            | Network meta-analysis   |
| 34 |                          |      | Systematic  |     |                   |                      |      |    |           | (MM)                 |                            |                         |
| 35 |                          |      | Reviews     |     |                   |                      |      |    |           |                      |                            |                         |
| 36 | Monk <sup>62</sup>       | 2017 | Cochrane    | 6.8 | Medicine, General | Non-                 | 0/4  | 32 | 1993-2016 | Adults and children  | Typhoid fever vaccines - 4 | No treatment, placebo,  |
| 37 |                          |      | Database of |     | & Internal        | industry             |      |    |           |                      | types                      | typhoid-inactive        |
| 38 |                          |      | Systematic  |     |                   |                      |      |    |           |                      | Tramadol, non-steroidal    | agents                  |
| 39 |                          |      | Reviews     |     |                   |                      |      |    |           |                      | anti-inflammatory drugs,   |                         |
| 40 | Montero <sup>63</sup>    | 2018 | Cochrane    | 6.8 | Medicine, General | Non-                 | 0/4  | 10 | 1991-2012 | People undergoing    | paracetamol, local         |                         |
| 41 |                          |      | Database of |     | & Internal        | industry             |      |    |           | orthodontic          | anaesthetic                | Placebo, no treatment   |
| 42 |                          |      | Systematic  |     |                   |                      |      |    |           | Patients with        |                            |                         |
| 43 |                          |      | Reviews     |     |                   |                      |      |    |           | hepatitis C virus-   | Rituximab, interferon,     | Usual care,             |
| 44 |                          |      | Cochrane    |     |                   |                      |      |    |           | associated mixed     | immunosuppressive drug     | immunoabsorption        |
| 45 | Montero <sup>63</sup>    | 2018 | Database of | 6.8 | Medicine, General | No                   | 1/7  | 10 | 1991-2012 | cryoglobulinaemia    | therapy                    | apheresis               |
| 46 |                          |      | Systematic  |     | & Internal        | funding <sup>i</sup> |      |    |           | Adults (18 years and |                            |                         |
| 47 |                          |      | Reviews     |     |                   |                      |      |    |           | over) with chronic   | Cannabis-based medicines   | Placebo,                |
|    | Mücke <sup>64</sup>      | 2018 | Cochrane    | 6.8 | Medicine, General | Non-                 | 2/5  | 16 | 2004-2017 | neuropathic pain     | - 5 types                  | dihydrocodeine          |

|    |                          |      |             |     |                   |          |     |                 |                          |                       |                            |                                                |
|----|--------------------------|------|-------------|-----|-------------------|----------|-----|-----------------|--------------------------|-----------------------|----------------------------|------------------------------------------------|
| 1  |                          |      |             |     |                   |          |     |                 |                          |                       |                            |                                                |
| 2  |                          |      |             |     |                   |          |     |                 |                          |                       |                            |                                                |
| 3  |                          |      | Systematic  |     |                   |          |     |                 |                          |                       |                            |                                                |
| 4  |                          |      | Reviews     |     |                   |          |     |                 |                          |                       |                            |                                                |
| 5  |                          |      | Cochrane    |     |                   |          |     |                 |                          |                       |                            |                                                |
| 6  |                          |      | Database of |     |                   |          |     |                 |                          |                       |                            |                                                |
| 7  | Narula <sup>65</sup>     | 2018 | Systematic  | 6.8 | Medicine, General | Non-     | 3/7 | 10 <sup>j</sup> | 1990-2014                | Adults and children   | Corticosteroids - 5 types  | Enteral nutrition                              |
| 8  |                          |      | Reviews     |     | & Internal        | industry |     |                 |                          | with Crohn's disease  |                            |                                                |
| 9  |                          |      | Cochrane    |     |                   |          |     |                 |                          | Adults or children    |                            |                                                |
| 10 |                          |      | Database of |     |                   |          |     |                 |                          | with partial onset    |                            |                                                |
| 11 | Nevitt <sup>66</sup>     | 2017 | Systematic  | 6.8 | Medicine, General | Non-     | 1/5 | 76              | 1981-2015                | seizures or           | Antiepileptic drugs - 10   | Network meta-analysis                          |
| 12 |                          |      | Reviews     |     | & Internal        | industry |     |                 |                          | generalised onset     | types                      |                                                |
| 13 |                          |      | Cochrane    |     |                   |          |     |                 |                          | tonic-clonic seizures |                            |                                                |
| 14 | Nevitt <sup>67</sup>     | 2018 | Database of | 6.8 | Medicine, General | Non-     | 1/4 | 14              | 1995-2015                | Adults and children   | Lamotrigine                | Carbamazepine                                  |
| 15 |                          |      | Systematic  |     | & Internal        | industry |     |                 |                          | with focal onset or   |                            |                                                |
| 16 |                          |      | Reviews     |     |                   |          |     |                 |                          | generalised onset     |                            |                                                |
| 17 | Norman <sup>68</sup>     | 2018 | Cochrane    | 6.8 | Medicine, General | Non-     | 1/6 | 78              | 1985-2016                | seizures              | Topical agents - 10 types  | Dressings - 12 types;<br>Network meta-analysis |
| 18 |                          |      | Database of |     |                   |          |     |                 |                          | Adults (18 years and  |                            |                                                |
| 19 |                          |      | Systematic  |     |                   |          |     |                 |                          | over) with venous     |                            |                                                |
| 20 | Normansell <sup>69</sup> | 2018 | Reviews     | 6.8 | Medicine, General | Non-     | 0/6 | 6               | 1974-2016                | leg ulcers            | Antibiotics - 4 types      | Placebo                                        |
| 21 |                          |      | Cochrane    |     |                   |          |     |                 |                          | Children and adults   | Propranolol, timolol       |                                                |
| 22 |                          |      | Database of |     |                   |          |     |                 |                          | with acute asthma     | maleate, bleomycin,        |                                                |
| 23 |                          |      | Systematic  |     |                   |          |     |                 |                          | exacerbation          | atenolol, prednisolone,    |                                                |
| 24 |                          |      | Reviews     |     |                   |          |     |                 |                          |                       | captopril, ibuprofen +     |                                                |
| 25 | Nova <sup>70</sup>       | 2018 | Database of | 6.8 | Medicine, General | Non-     | 1/7 | 24              | 1977-2016                | located on the skin   | paracetamol, methylene     | Placebo, radiation,<br>lasers                  |
| 26 |                          |      | Systematic  |     |                   |          |     |                 |                          | Preterm (< 37         | blue, triamcinolone,       |                                                |
| 27 |                          |      | Reviews     |     |                   |          |     |                 |                          | weeks' gestation)     | methylprednisolone         |                                                |
| 28 |                          |      | Cochrane    |     |                   |          |     |                 |                          | and low birth weight  |                            |                                                |
| 29 |                          |      | Database of |     |                   |          |     |                 |                          | (< 2500 grams)        |                            |                                                |
| 30 | Ohlsson <sup>71</sup>    | 2017 | Systematic  | 6.8 | Medicine, General | No       | 0/2 | 34              | 1991-2017                | infants less than     | Erythropoiesis-stimulating | Placebo, no treatment                          |
| 31 |                          |      | Reviews     |     | & Internal        | funding  |     |                 |                          | eight days of age     | agents (ESAs) - 2 types    |                                                |
| 32 |                          |      | Cochrane    |     |                   |          |     |                 |                          | Adults exhibiting     |                            |                                                |
| 33 | Ostinelli <sup>72</sup>  | 2018 | Database of | 6.8 | Medicine, General | No       | 1/5 | 3               | 2005-2016                | aggression or         | Aripiprazole               | Placebo, other anti-<br>psychotic medications  |
| 34 |                          |      | Systematic  |     | & Internal        | funding  |     |                 |                          | agitation (or both)   |                            | - 2 types                                      |
| 35 |                          |      | Reviews     |     |                   |          |     |                 |                          | due to psychosis      |                            | Haloperidol,                                   |
| 36 | Ostinelli <sup>73</sup>  | 2018 | Cochrane    | 6.8 | Medicine, General | No       | 0/6 | 9               | 2010-2014                | Patients with         | Risperidone                | olanzapine, quetiapine,                        |
| 37 |                          |      | Database of |     |                   | industry |     |                 |                          | psychosis-induced     |                            | oxcarbazepine,                                 |
| 38 |                          |      | Systematic  |     |                   |          |     |                 |                          | aggression or         |                            | valproic acid                                  |
| 39 | Ostuzzi <sup>74</sup>    | 2018 | Reviews     | 6.8 | Medicine, General | Non-     | 1/5 | 7               | 1985-<br>Unpublishe<br>d | Adults (18 years and  | Antidepressants - 6 types  | Placebo                                        |
| 40 |                          |      | Cochrane    |     |                   |          |     |                 |                          | over) with cancer     |                            |                                                |
| 41 |                          |      | Database of |     |                   |          |     |                 |                          | and depression        |                            |                                                |
| 42 |                          |      | Systematic  |     |                   |          |     |                 |                          |                       |                            |                                                |
| 43 |                          |      | Reviews     |     |                   |          |     |                 |                          |                       |                            |                                                |
| 44 |                          |      |             |     |                   |          |     |                 |                          |                       |                            |                                                |
| 45 |                          |      |             |     |                   |          |     |                 |                          |                       |                            |                                                |
| 46 |                          |      |             |     |                   |          |     |                 |                          |                       |                            |                                                |
| 47 |                          |      |             |     |                   |          |     |                 |                          |                       |                            |                                                |

|     |                         |      |             |     |                   |          |            |     |           |                        |                           |
|-----|-------------------------|------|-------------|-----|-------------------|----------|------------|-----|-----------|------------------------|---------------------------|
| 1   |                         |      |             |     |                   |          |            |     |           |                        |                           |
| 2   |                         |      |             |     |                   |          |            |     |           |                        |                           |
| 3   |                         |      | Cochrane    |     |                   |          |            |     |           |                        |                           |
| 4   |                         |      | Database of |     |                   |          |            |     |           |                        |                           |
| 5   | Parker <sup>75</sup>    | 2018 | Systematic  | 6.8 | Medicine, General | Non-     | 2/5        | 2   | 2011-2013 | Children and adults    |                           |
| 6   |                         |      | Reviews     |     | & Internal        | industry |            |     |           | with active Crohn's    | Naltrexone                |
| 7   |                         |      |             |     |                   |          |            |     |           | disease                | Placebo                   |
| 8   |                         |      |             |     |                   |          |            |     |           |                        | Tamoxifen, interferon-    |
| 9   |                         |      |             |     |                   |          |            |     |           |                        | alpha, interleukin-2,     |
| 10  |                         |      |             |     |                   |          |            |     |           |                        | interferon-alpha +        |
| 11  |                         |      |             |     |                   |          |            |     |           |                        | interleukin-2, Bacille    |
| 12  |                         |      |             |     |                   |          |            |     |           |                        | Calmette-Guérin           |
| 13  |                         |      | Cochrane    |     |                   |          |            |     |           |                        | (BCG),                    |
| 14  |                         |      | Database of |     |                   |          |            |     |           |                        | corynebacterium           |
| 15  | Pasquali <sup>76</sup>  | 2018 | Systematic  | 6.8 | Medicine, General | Non-     | 0/5        | 122 | 1972-2015 | Patients with          | parvum, anti-PD1          |
| 16  |                         |      | Reviews     |     | & Internal        | industry |            |     |           | unresectable lymph     | monoclonal                |
| 17  |                         |      | Cochrane    |     |                   |          |            |     |           | node metastasis and    | antibodies, sorafenib,    |
| 18  |                         |      | Database of |     |                   |          |            |     |           | distant metastatic     | elesclomo, anti-          |
| 19  |                         |      | Systematic  |     |                   |          |            |     |           | cutaneous              | angiogenic drugs          |
| 20  |                         |      | Reviews     |     |                   |          |            |     |           | melanoma               |                           |
| 21  | Pike <sup>77</sup>      | 2018 | Systematic  | 6.8 | Medicine, General | Non-     | 0/4        | 4   | 2007-2017 | Children (18 years     |                           |
| 22  |                         |      | Reviews     |     | & Internal        | industry |            |     |           | and under) with        | Omalizumab, leukotriene   |
| 23  |                         |      | Cochrane    |     |                   |          |            |     |           | asthma                 | receptor antagonists - 2  |
| 24  |                         |      | Database of |     |                   |          |            |     |           |                        | types, corticosteroids    |
| 25  |                         |      | Systematic  |     |                   |          |            |     |           |                        | Placebo                   |
| 26  |                         |      | Reviews     |     |                   |          |            |     |           |                        |                           |
| 27  | Rirash <sup>78</sup>    | 2017 | Systematic  | 6.8 | Medicine, General | Not      | Not        | 38  | 1982-2000 | Patients with          |                           |
| 28  |                         |      | Reviews     |     | & Internal        | reported | reported/8 |     |           | Raynaud's              | Calcium channel blockers  |
| 29  |                         |      | Cochrane    |     |                   |          |            |     |           | phenomenon             | Placebo                   |
| 30  |                         |      | Database of |     |                   |          |            |     |           | Adults (18 years and   |                           |
| 31  |                         |      | Systematic  |     |                   |          |            |     |           | over) with             |                           |
| 32  | Robertson <sup>79</sup> | 2017 | Reviews     | 6.8 | Medicine, General | Non-     | 0/3        | 6   | 1995-2016 | unprovoked venous      | Warfarin, aspirin,        |
| 33  |                         |      | Systematic  |     | & Internal        | industry |            |     |           | thromboembolism        | rivaroxaban               |
| 34  |                         |      | Reviews     |     |                   |          |            |     |           | Sexually active        | Placebo                   |
| 35  |                         |      | Cochrane    |     |                   |          |            |     |           | adults (16 years and   |                           |
| 36  |                         |      | Database of |     |                   |          |            |     |           | over) with genital     |                           |
| 37  |                         |      | Systematic  |     |                   |          |            |     |           | ulcers compatible      | Macrolide antibiotics - 3 |
| 38  | Romero <sup>80</sup>    | 2017 | Reviews     | 6.8 | Medicine, General | Non-     | 0/3        | 7   | 1983-1999 | with chancroid         | types                     |
| 39  |                         |      | Cochrane    |     |                   |          |            |     |           |                        | Other antibiotics - 4     |
| 40  |                         |      | Database of |     |                   |          |            |     |           |                        | types                     |
| 41  |                         |      | Systematic  |     |                   |          |            |     |           |                        |                           |
| 42  |                         |      | Reviews     |     |                   |          |            |     |           |                        |                           |
| 43  | Rosomeck <sup>81</sup>  | 2018 | Systematic  | 6.8 | Medicine, General | Non-     | 0/3        | 15  | 1996-2016 | People with scabies    |                           |
| 44  |                         |      | Reviews     |     | & Internal        | industry |            |     |           | of all ages and either | Ivermectin                |
| 45  |                         |      | Cochrane    |     |                   |          |            |     |           | sex                    | Permethrin                |
| 46  |                         |      | Database of |     |                   |          |            |     |           |                        |                           |
| 47  |                         |      | Systematic  |     |                   |          |            |     |           |                        |                           |
| 48  |                         |      | Reviews     |     |                   |          |            |     |           |                        |                           |
| 49  |                         |      |             |     |                   |          |            |     |           |                        |                           |
| 50  |                         |      |             |     |                   |          |            |     |           |                        |                           |
| 51  |                         |      |             |     |                   |          |            |     |           |                        |                           |
| 52  |                         |      |             |     |                   |          |            |     |           |                        |                           |
| 53  |                         |      |             |     |                   |          |            |     |           |                        |                           |
| 54  |                         |      |             |     |                   |          |            |     |           |                        |                           |
| 55  |                         |      |             |     |                   |          |            |     |           |                        |                           |
| 56  |                         |      |             |     |                   |          |            |     |           |                        |                           |
| 57  |                         |      |             |     |                   |          |            |     |           |                        |                           |
| 58  |                         |      |             |     |                   |          |            |     |           |                        |                           |
| 59  |                         |      |             |     |                   |          |            |     |           |                        |                           |
| 60  |                         |      |             |     |                   |          |            |     |           |                        |                           |
| 61  |                         |      |             |     |                   |          |            |     |           |                        |                           |
| 62  |                         |      |             |     |                   |          |            |     |           |                        |                           |
| 63  |                         |      |             |     |                   |          |            |     |           |                        |                           |
| 64  |                         |      |             |     |                   |          |            |     |           |                        |                           |
| 65  |                         |      |             |     |                   |          |            |     |           |                        |                           |
| 66  |                         |      |             |     |                   |          |            |     |           |                        |                           |
| 67  |                         |      |             |     |                   |          |            |     |           |                        |                           |
| 68  |                         |      |             |     |                   |          |            |     |           |                        |                           |
| 69  |                         |      |             |     |                   |          |            |     |           |                        |                           |
| 70  |                         |      |             |     |                   |          |            |     |           |                        |                           |
| 71  |                         |      |             |     |                   |          |            |     |           |                        |                           |
| 72  |                         |      |             |     |                   |          |            |     |           |                        |                           |
| 73  |                         |      |             |     |                   |          |            |     |           |                        |                           |
| 74  |                         |      |             |     |                   |          |            |     |           |                        |                           |
| 75  |                         |      |             |     |                   |          |            |     |           |                        |                           |
| 76  |                         |      |             |     |                   |          |            |     |           |                        |                           |
| 77  |                         |      |             |     |                   |          |            |     |           |                        |                           |
| 78  |                         |      |             |     |                   |          |            |     |           |                        |                           |
| 79  |                         |      |             |     |                   |          |            |     |           |                        |                           |
| 80  |                         |      |             |     |                   |          |            |     |           |                        |                           |
| 81  |                         |      |             |     |                   |          |            |     |           |                        |                           |
| 82  |                         |      |             |     |                   |          |            |     |           |                        |                           |
| 83  |                         |      |             |     |                   |          |            |     |           |                        |                           |
| 84  |                         |      |             |     |                   |          |            |     |           |                        |                           |
| 85  |                         |      |             |     |                   |          |            |     |           |                        |                           |
| 86  |                         |      |             |     |                   |          |            |     |           |                        |                           |
| 87  |                         |      |             |     |                   |          |            |     |           |                        |                           |
| 88  |                         |      |             |     |                   |          |            |     |           |                        |                           |
| 89  |                         |      |             |     |                   |          |            |     |           |                        |                           |
| 90  |                         |      |             |     |                   |          |            |     |           |                        |                           |
| 91  |                         |      |             |     |                   |          |            |     |           |                        |                           |
| 92  |                         |      |             |     |                   |          |            |     |           |                        |                           |
| 93  |                         |      |             |     |                   |          |            |     |           |                        |                           |
| 94  |                         |      |             |     |                   |          |            |     |           |                        |                           |
| 95  |                         |      |             |     |                   |          |            |     |           |                        |                           |
| 96  |                         |      |             |     |                   |          |            |     |           |                        |                           |
| 97  |                         |      |             |     |                   |          |            |     |           |                        |                           |
| 98  |                         |      |             |     |                   |          |            |     |           |                        |                           |
| 99  |                         |      |             |     |                   |          |            |     |           |                        |                           |
| 100 |                         |      |             |     |                   |          |            |     |           |                        |                           |

|    |                             |      |             |     |                   |          |                  |                 |           |                         |                            |                        |
|----|-----------------------------|------|-------------|-----|-------------------|----------|------------------|-----------------|-----------|-------------------------|----------------------------|------------------------|
| 1  |                             |      |             |     |                   |          |                  |                 |           |                         |                            |                        |
| 2  |                             |      |             |     |                   |          |                  |                 |           |                         |                            |                        |
| 3  |                             |      | Cochrane    |     |                   |          |                  |                 |           |                         |                            |                        |
| 4  |                             |      | Database of |     |                   |          |                  |                 |           |                         |                            |                        |
| 5  | Sankar <sup>84</sup>        | 2018 | Systematic  | 6.8 | Medicine, General | No       | 0/3              | 6               | 2011-2016 | Preterm infants with    | Anti-vascular endothelial  |                        |
| 6  |                             |      | Reviews     |     | & Internal        | funding  |                  |                 |           | retinopathy             | growth factor agents - 2   | Cryo/laser therapy     |
| 7  |                             |      |             |     |                   |          |                  |                 |           |                         | types                      |                        |
| 8  |                             |      |             |     |                   |          |                  |                 |           |                         | Levosimendan,              |                        |
| 9  |                             |      | Cochrane    |     |                   |          |                  |                 |           | Adults (18 years and    | epinephrine,               |                        |
| 10 |                             |      | Database of |     | Medicine, General | Non-     |                  |                 |           | over) with              | norepinephrine-            |                        |
| 11 | Schumann <sup>85</sup>      | 2018 | Systematic  | 6.8 | & Internal        | industry | 3/9              | 13              | 1990-2013 | cardiogenic shock or    | dobutamine, amrinone,      | Placebo, no treatment  |
| 12 |                             |      | Reviews     |     |                   |          |                  |                 |           | acute low cardiac       | dopexamine, dopamine,      |                        |
| 13 |                             |      |             |     |                   |          |                  |                 |           | output syndrome         | nitric oxid                |                        |
| 14 | Simancas-                   |      | Cochrane    |     | Medicine, General | Non-     |                  |                 |           | People suffering        | Acetazolamide, ibuprofen,  | Placebo, normal air,   |
| 15 | Racines <sup>86</sup>       | 2018 | Database of | 6.8 | & Internal        | industry | 0/6              | 13 <sup>k</sup> | 1992-1994 | from high altitude      | dexamethasone, oxygen,     | unspecified control,   |
| 16 |                             |      | Reviews     |     |                   |          |                  |                 |           | illness                 | nitric oxide, gabapentin,  | paracetamol            |
| 17 |                             |      | Cochrane    |     |                   |          |                  |                 |           |                         | sumatriptan                |                        |
| 18 | Smith <sup>87</sup>         | 2017 | Database of | 6.8 | Medicine, General | Non-     | 0/2              | 4               | 1998-2015 | Adults and children     | Salmeterol, tiotropium     | No treatment, placebo  |
| 19 |                             |      | Systematic  |     | & Internal        | industry |                  |                 |           | with cystic fibrosis    |                            | Placebo, no treatment, |
| 20 |                             |      | Reviews     |     |                   |          |                  |                 |           |                         |                            | intramuscular or       |
| 21 | Smith <sup>88</sup>         | 2018 | Cochrane    | 6.8 | Medicine, General | Non-     | 0/3              | 70              | 1958-2017 | Women in labour         | Intramuscular or           | intravenous opioids -  |
| 22 |                             |      | Database of |     | & Internal        | industry |                  |                 |           |                         | intravenous opioids -      | 16 types               |
| 23 |                             |      | Systematic  |     |                   |          |                  |                 |           |                         | 16 types                   |                        |
| 24 |                             |      | Reviews     |     |                   |          |                  |                 |           |                         | Alkaloids - 3 types,       |                        |
| 25 |                             |      |             |     |                   |          |                  |                 |           |                         | antidepressants - 3 types, |                        |
| 26 |                             |      |             |     |                   |          |                  |                 |           |                         | levetiracetam,             |                        |
| 27 |                             |      | Cochrane    |     |                   |          |                  |                 |           |                         | cyproheptadin,             |                        |
| 28 | Soares-Weiser <sup>89</sup> | 2018 | Database of | 6.8 | Medicine, General | Non-     | 0/5 <sup>l</sup> | 24 <sup>m</sup> | 1971-2014 | Adults with chronic     | promethazine, buspiron,    | Placebo                |
| 29 |                             |      | Systematic  |     | & Internal        | industry |                  |                 |           | psychiatric disorders   | cognitive enhancers - 2    |                        |
| 30 |                             |      | Reviews     |     |                   |          |                  |                 |           | People with             | types, VMAT2 inhibitors,   |                        |
| 31 |                             |      |             |     |                   |          |                  |                 |           | coronary disease,       | ethyleicosapentaenoic acid |                        |
| 32 |                             |      |             |     |                   |          |                  |                 |           | ischaemic               | (ethyl-EPA), hormones - 3  |                        |
| 33 |                             |      |             |     |                   |          |                  |                 |           | cerebrovascular         | types, lithium, ceruletide |                        |
| 34 |                             |      | Cochrane    |     |                   |          |                  |                 |           | disease, peripheral     |                            |                        |
| 35 | Squizzato <sup>90</sup>     | 2017 | Database of | 6.8 | Medicine, General | Non-     | 2/5              | 15              | 2001-2017 | arterial disease, or at | Clopidrogel                | Placebo, usual care    |
| 36 |                             |      | Systematic  |     | & Internal        | industry |                  |                 |           | high risk of            | Articaine, articaine +     | (aspirin)              |
| 37 |                             |      | Reviews     |     |                   |          |                  |                 |           | atherothrombotic        | epinephrine, lidocaine +   |                        |
| 38 |                             |      |             |     |                   |          |                  |                 |           | disease                 | epinephrine, bupivacaine + |                        |
| 39 |                             |      | Cochrane    |     |                   |          |                  |                 |           |                         | epinephrine, mepivacaine   |                        |
| 40 |                             |      | Database of |     | Medicine, General | Non-     |                  |                 |           | Individuals             | + epinephrine,             |                        |
| 41 | St George <sup>91</sup>     | 2018 | Systematic  | 6.8 | & Internal        | industry | 1/7              | 123             | 1954-2017 | undergoing dental       | mepivacaine +              | Local anaesthetics     |
| 42 |                             |      | Reviews     |     |                   |          |                  |                 |           | procedures and          | levonordefrin,             |                        |
| 43 |                             |      |             |     |                   |          |                  |                 |           | volunteers who took     |                            |                        |
| 44 |                             |      |             |     |                   |          |                  |                 |           | part in simulated       |                            |                        |
| 45 |                             |      |             |     |                   |          |                  |                 |           | scenario studies        |                            |                        |
| 46 |                             |      |             |     |                   |          |                  |                 |           |                         |                            |                        |
| 47 |                             |      |             |     |                   |          |                  |                 |           |                         |                            |                        |



1  
2  
3  
4  
5  
6  
7  
8  
9  
10  
11  
12  
13  
14  
15  
16  
17  
18  
19  
20  
21  
22  
23  
24  
25  
26  
27  
28  
29  
30  
31  
32  
33  
34  
35  
36  
37  
38  
39  
40  
41  
42  
43  
44  
45  
46  
47

mepivacaine, prilocaine,  
prilocaine + felypressin,  
prilocaine + epinephrine

|                             |      |                                         |     |                              |              |     |                  |           |                                                                                                                            |                                                                                                                                                      |                                                                                                                                                                                    |
|-----------------------------|------|-----------------------------------------|-----|------------------------------|--------------|-----|------------------|-----------|----------------------------------------------------------------------------------------------------------------------------|------------------------------------------------------------------------------------------------------------------------------------------------------|------------------------------------------------------------------------------------------------------------------------------------------------------------------------------------|
| Stern <sup>92</sup>         | 2017 | Cochrane Database of Systematic Reviews | 6.8 | Medicine, General & Internal | Non-industry | 0/6 | 17               | 1972-2015 | Adults and children with pneumonia                                                                                         | Corticosteroids - 7 types                                                                                                                            | Placebo, usual care                                                                                                                                                                |
| Sturman <sup>93</sup>       | 2017 | Cochrane Database of Systematic Reviews | 6.8 | Medicine, General & Internal | No funding   | 0/3 | 4                | 1995-2013 | Children and adolescents (18 years or under) with autism spectrum disorder (ASD) or pervasive developmental disorder (PDD) | Methylphenidate                                                                                                                                      | Placebo                                                                                                                                                                            |
| Tammenmaa-Aho <sup>94</sup> | 2018 | Cochrane Database of Systematic Reviews | 6.8 | Medicine, General & Internal | Non-industry | 0/4 | 14               | 1976-2014 | Psychiatric patients with antipsychotic-induced tardive dyskinesia                                                         | Cholinergic drugs - 6 types                                                                                                                          | Placebo                                                                                                                                                                            |
| Temmingh <sup>95</sup>      | 2018 | Cochrane Database of Systematic Reviews | 6.8 | Medicine, General & Internal | Non-industry | 2/4 | 8                | 2006-2014 | Adults (17 years and over) with severe mental illness and co-occurring substance use disorder                              | Risperidone                                                                                                                                          | Other antipsychotics - 5 types                                                                                                                                                     |
| Tenforde <sup>96</sup>      | 2018 | Cochrane Database of Systematic Reviews | 6.8 | Medicine, General & Internal | Non-industry | 1/7 | 13               | 1997-2018 | Adults with HIV-associated cryptococcal meningitis                                                                         | Antifungal induction therapies - 6 types                                                                                                             | Network meta-analysis                                                                                                                                                              |
| Toews <sup>97</sup>         | 2018 | Cochrane Database of Systematic Reviews | 6.8 | Medicine, General & Internal | Non-industry | 0/7 | 103 <sup>n</sup> | 1977-2016 | People admitted to intensive care units                                                                                    | H2 receptor antagonists, proton pump inhibitors, prostaglandin analogues, anticholinergics, antacids, sucralfate, teprenone, naloxone, bioflavonoids | H2 receptor antagonists, proton pump inhibitors, prostaglandin analogues, anticholinergics, antacids, sucralfate, teprenone, placebo, no treatment, other medication (not defined) |
| Venekamp <sup>98</sup>      | 2018 | Cochrane Database of Systematic Reviews | 6.8 | Medicine, General & Internal | Non-industry | 1/4 | 3 <sup>o</sup>   | 1992-1996 | Children (16 years and under) with recurrent acute otitis media                                                            | Antibiotics - 3 types                                                                                                                                | Grommets                                                                                                                                                                           |
| Vermeij <sup>99</sup>       | 2018 | Cochrane Database of Systematic Reviews | 6.8 | Medicine, General & Internal | Non-industry | 0/6 | 8                | 1998-2016 | Individuals who had an ischemic or hemorrhagic stroke                                                                      | Preventive antibiotics                                                                                                                               | Placebo, standard care                                                                                                                                                             |



|    |                      |      |          |     |                              |              |     |    |           |                                                                                                                                                      |                                                                         |                                                   |
|----|----------------------|------|----------|-----|------------------------------|--------------|-----|----|-----------|------------------------------------------------------------------------------------------------------------------------------------------------------|-------------------------------------------------------------------------|---------------------------------------------------|
| 1  |                      |      |          |     |                              |              |     |    |           |                                                                                                                                                      |                                                                         |                                                   |
| 2  |                      |      |          |     |                              |              |     |    |           |                                                                                                                                                      |                                                                         |                                                   |
| 3  |                      |      |          |     |                              |              |     |    |           |                                                                                                                                                      |                                                                         |                                                   |
| 4  | Chen <sup>111</sup>  | 2018 | Medicine | 2.0 | Medicine, General & Internal | Non-industry | 0/3 | 9  | 2009-2017 | Patients with sepsis                                                                                                                                 | Statins - 3 types                                                       | Placebo                                           |
| 5  |                      |      |          |     |                              |              |     |    |           | Patients with hormone receptor-positive or human epidermal growth factor receptor 2                                                                  |                                                                         |                                                   |
| 6  |                      |      |          |     |                              |              |     |    |           | negative advanced breast cancer                                                                                                                      | Cyclin-dependent kinases 4/6 inhibitors - 3 types                       | Placebo                                           |
| 7  |                      |      |          |     |                              |              |     |    |           | Adults undergoing total knee                                                                                                                         |                                                                         |                                                   |
| 8  |                      |      |          |     |                              |              |     |    |           | arthroplasty (TKA)                                                                                                                                   | Tranexamic acid (TXA)                                                   | Placebo, no treatment                             |
| 9  | Ding <sup>112</sup>  | 2018 | Medicine | 2.0 | Medicine, General & Internal | No funding   | 0/6 | 6  | 2014-2017 | Patients with myocardial infarction                                                                                                                  |                                                                         |                                                   |
| 10 |                      |      |          |     |                              |              |     |    |           | Patients with acute coronary syndrome, percutaneous coronary intervention, or coronary stents given combination therapy with aspirin and clopidogrel |                                                                         |                                                   |
| 11 | Guo <sup>113</sup>   | 2018 | Medicine | 2.0 | Medicine, General & Internal | Non-industry | 0/8 | 5  | 2004-2017 | Patients with pterygium or glaucoma                                                                                                                  |                                                                         |                                                   |
| 12 |                      |      |          |     |                              |              |     |    |           | Patients with diabetic peripheral neuropathy                                                                                                         | Fasudil + methylcobalamin or lipoic acid                                | Methylcobalamin or lipoic acid alone              |
| 13 |                      |      |          |     |                              |              |     |    |           | Adult women with pathologically confirmed epithelial ovarian cancer                                                                                  | Antiangiogenic therapy (7 included) alone or combined with chemotherapy | Placebo or chemotherapy alone                     |
| 14 | Han <sup>114</sup>   | 2018 | Medicine | 2.0 | Medicine, General & Internal | Not reported | 0/7 | 18 | 2007-2016 | Patients with advanced non-small cell lung cancer                                                                                                    | Immune checkpoint inhibitors: anti-PD1/PD-L1 therapies - 3 types        | Chemotherapy - 6 regimens                         |
| 15 |                      |      |          |     |                              |              |     |    |           | Patients undergoing total knee or hip arthroplasty                                                                                                   | Acetaminophen                                                           | Normal saline or placebo                          |
| 16 |                      |      |          |     |                              |              |     |    |           | Adults with social anxiety disorder                                                                                                                  | Fluvoxamine                                                             | Placebo                                           |
| 17 |                      |      |          |     |                              |              |     |    |           | Children and adults requiring nasogastric intubation                                                                                                 | Lidocaine                                                               | Normal saline, K-Y lubricant gel, or no treatment |
| 18 |                      |      |          |     |                              |              |     |    |           | Adults with intertrochanteric fractures preparing for internal fixation                                                                              | Tranexamic acid                                                         | Placebo, no treatment                             |
| 19 |                      |      |          |     |                              |              |     |    |           |                                                                                                                                                      |                                                                         |                                                   |
| 20 | Hu <sup>115</sup>    | 2018 | Medicine | 2.0 | Medicine, General & Internal | Not reported | 0/5 | 4  | 2010-2016 |                                                                                                                                                      |                                                                         |                                                   |
| 21 |                      |      |          |     |                              |              |     |    |           |                                                                                                                                                      |                                                                         |                                                   |
| 22 |                      |      |          |     |                              |              |     |    |           |                                                                                                                                                      |                                                                         |                                                   |
| 23 | Huang <sup>116</sup> | 2018 | Medicine | 2.0 | Medicine, General & Internal | Not reported | 0/5 | 18 | 2010-2015 |                                                                                                                                                      |                                                                         |                                                   |
| 24 |                      |      |          |     |                              |              |     |    |           |                                                                                                                                                      |                                                                         |                                                   |
| 25 | Jiang <sup>117</sup> | 2018 | Medicine | 2.0 | Medicine, General & Internal | Non-industry | 0/5 | 13 | 2010-2017 |                                                                                                                                                      |                                                                         |                                                   |
| 26 |                      |      |          |     |                              |              |     |    |           |                                                                                                                                                      |                                                                         |                                                   |
| 27 |                      |      |          |     |                              |              |     |    |           |                                                                                                                                                      |                                                                         |                                                   |
| 28 | Jiang <sup>118</sup> | 2018 | Medicine | 2.0 | Medicine, General & Internal | Non-industry | 0/4 | 15 | 2011-2016 |                                                                                                                                                      |                                                                         |                                                   |
| 29 |                      |      |          |     |                              |              |     |    |           |                                                                                                                                                      |                                                                         |                                                   |
| 30 | Khan <sup>119</sup>  | 2018 | Medicine | 2.0 | Medicine, General & Internal | Non-industry | 0/8 | 7  | 2015-2017 |                                                                                                                                                      |                                                                         |                                                   |
| 31 |                      |      |          |     |                              |              |     |    |           |                                                                                                                                                      |                                                                         |                                                   |
| 32 |                      |      |          |     |                              |              |     |    |           |                                                                                                                                                      |                                                                         |                                                   |
| 33 | Liang <sup>120</sup> | 2017 | Medicine | 2.0 | Medicine, General & Internal | No funding   | 0/4 | 3  | 2016-2017 |                                                                                                                                                      |                                                                         |                                                   |
| 34 |                      |      |          |     |                              |              |     |    |           |                                                                                                                                                      |                                                                         |                                                   |
| 35 | Liu <sup>121</sup>   | 2018 | Medicine | 2.0 | Medicine, General & Internal | No funding   | 0/7 | 5  | 1999-2007 |                                                                                                                                                      |                                                                         |                                                   |
| 36 |                      |      |          |     |                              |              |     |    |           |                                                                                                                                                      |                                                                         |                                                   |
| 37 | Lor <sup>122</sup>   | 2017 | Medicine | 2.0 | Medicine, General & Internal | No funding   | 0/8 | 10 | 1999-2015 |                                                                                                                                                      |                                                                         |                                                   |
| 38 |                      |      |          |     |                              |              |     |    |           |                                                                                                                                                      |                                                                         |                                                   |
| 39 |                      |      |          |     |                              |              |     |    |           |                                                                                                                                                      |                                                                         |                                                   |
| 40 |                      |      |          |     |                              |              |     |    |           |                                                                                                                                                      |                                                                         |                                                   |
| 41 | Wang <sup>123</sup>  | 2017 | Medicine | 2.0 | Medicine, General & Internal | No funding   | 0/2 | 4  | 2015-2017 |                                                                                                                                                      |                                                                         |                                                   |
| 42 |                      |      |          |     |                              |              |     |    |           |                                                                                                                                                      |                                                                         |                                                   |
| 43 |                      |      |          |     |                              |              |     |    |           |                                                                                                                                                      |                                                                         |                                                   |
| 44 |                      |      |          |     |                              |              |     |    |           |                                                                                                                                                      |                                                                         |                                                   |
| 45 |                      |      |          |     |                              |              |     |    |           |                                                                                                                                                      |                                                                         |                                                   |
| 46 |                      |      |          |     |                              |              |     |    |           |                                                                                                                                                      |                                                                         |                                                   |
| 47 |                      |      |          |     |                              |              |     |    |           |                                                                                                                                                      |                                                                         |                                                   |



1  
2  
3  
4  
5  
6  
7  
8  
9  
10  
11  
12  
13  
14  
15  
16  
17  
18  
19  
20  
21  
22  
23  
24  
25  
26  
27  
28  
29  
30  
31  
32  
33  
34  
35  
36  
37  
38  
39  
40  
41  
42  
43  
44  
45  
46  
47

|                      |      |                                         |     |                              |              |                |    |           |                                                                                                                                                                                   |                                                                                        |                                                                                                |
|----------------------|------|-----------------------------------------|-----|------------------------------|--------------|----------------|----|-----------|-----------------------------------------------------------------------------------------------------------------------------------------------------------------------------------|----------------------------------------------------------------------------------------|------------------------------------------------------------------------------------------------|
| Zhou <sup>137</sup>  | 2018 | Medicine                                | 2.0 | Medicine, General & Internal | No funding   | 0/4            | 6  | 2013-2017 | symptomatic cholelithiasis and acute cholecystitis who prepared for laparoscopic cholecystectomy<br>Adults with end-staged knee osteoarthritis undergoing total knee arthroplasty | Dexamethasone                                                                          | Placebo, no treatment                                                                          |
| Zhu <sup>138</sup>   | 2018 | Medicine Postgraduate                   | 2.0 | Medicine, General & Internal | Not reported | 0/3            | 8  | 2002-2016 | Patients who underwent total hip arthroplasty                                                                                                                                     | Selective non-steroidal anti-inflammatory drugs (selective COX-2 inhibitors) - 4 types | Non-selective non-steroidal anti-inflammatory drugs (non-selective COX-2 inhibitors) - 4 types |
| Zhou <sup>139</sup>  | 2018 | Medicine                                | 2.1 | Medicine, General & Internal | No funding   | 0/5            | 10 | 2007-2017 | Patients with dyslipidemia                                                                                                                                                        | Anacetrapib                                                                            | Placebo, placebo + usual care                                                                  |
| Zhang <sup>140</sup> | 2018 | Revista da Associação Médica Brasileira | 0.7 | Medicine, General & Internal | Non-industry | Not reported/6 | 6  | 2012-2016 | Patients with complicated intra-abdominal infections and complicated urinary tract infections                                                                                     | Ceftazidime-avibactam                                                                  | Other antibiotics - 3 types, usual care                                                        |

**Specialty medicine (n = 100)**

|                          |      |                                          |     |                                                                         |              |                |    |           |                                                                       |                                                                                                             |                                                                                               |
|--------------------------|------|------------------------------------------|-----|-------------------------------------------------------------------------|--------------|----------------|----|-----------|-----------------------------------------------------------------------|-------------------------------------------------------------------------------------------------------------|-----------------------------------------------------------------------------------------------|
| Li <sup>141</sup>        | 2018 | Acta Ophthalmologica                     | 3.3 | Ophthalmology                                                           | Non-industry | Not reported/3 | 72 | 1995-2015 | Patients with primary open-angle glaucoma or ocular hypertension      | Prostaglandin analogues, alpha-2 adrenergic agonists, beta-blockers, carbonic anhydrase inhibitors, miotics | Placebo - Network meta-analysis                                                               |
| Tarantini <sup>142</sup> | 2018 | American Heart Journal                   | 4.2 | Cardiac & Cardiovascular Systems                                        | No funding   | 0/7            | 5  | 2007-2016 | Patients with acute coronary syndrome                                 | P2Y12 receptor inhibitors - 2 types                                                                         | Clopidogrel                                                                                   |
| Wang <sup>143</sup>      | 2018 | American Journal of Cardiovascular Drugs | 2.7 | Cardiac & Cardiovascular Systems; Pharmacology & Pharmacy               | Non-industry | 0/3            | 5  | 2014-2017 | Adults aged 18-65 years with hyperlipidemia                           | Inclisiran                                                                                                  | Placebo, other lipid-lowering agents - Network meta-analysis                                  |
| Aman <sup>144</sup>      | 2018 | Anaesthesia and Intensive Care           | 1.7 | Anesthesiology; Critical Care Medicine                                  | Non-industry | Not reported/5 | 10 | 1995-2015 | Patients undergoing caesarean section under general anaesthesia       | Opioid analgesics - 3 types, non-opioid analgesics - 5 types                                                | Placebo                                                                                       |
| Li <sup>145</sup>        | 2018 | Autoimmunity Reviews                     | 8.7 | Immunology                                                              | Non-industry | 0/7            | 15 | 2004-2017 | Patients with rheumatoid arthritis                                    | Statins - 2 types                                                                                           | Conventional treatment, placebo + conventional treatment                                      |
| Wang <sup>146</sup>      | 2018 | Biomed Research International            | 2.6 | Biotechnology & Applied Microbiology; Medicine, Research & Experimental | Non-industry | 0/4            | 15 | 2006-2017 | Patients with left ventricular dysfunction undergoing cardiac surgery | Levosimendan                                                                                                | Placebo, milrinone, dopamine, intra-aortic balloon pump (IABP), and standard inotropic agents |

|    |                           |      |                               |     |                                     |              |     |                  |           |                                                                                                     |                                                                                                                                                                                                                                                                                                                |                                   |
|----|---------------------------|------|-------------------------------|-----|-------------------------------------|--------------|-----|------------------|-----------|-----------------------------------------------------------------------------------------------------|----------------------------------------------------------------------------------------------------------------------------------------------------------------------------------------------------------------------------------------------------------------------------------------------------------------|-----------------------------------|
| 1  |                           |      |                               |     |                                     |              |     |                  |           |                                                                                                     |                                                                                                                                                                                                                                                                                                                |                                   |
| 2  |                           |      |                               |     |                                     |              |     |                  |           |                                                                                                     |                                                                                                                                                                                                                                                                                                                |                                   |
| 3  |                           |      |                               |     |                                     |              |     |                  |           |                                                                                                     |                                                                                                                                                                                                                                                                                                                |                                   |
| 4  |                           |      |                               |     |                                     |              |     |                  |           | Adults with history of colorectal cancer or adenoma                                                 | Aspirin, non-aspirin nonsteroidal anti-inflammatory drugs (NSAIDs)                                                                                                                                                                                                                                             | Placebo, no treatment             |
| 5  | Veettil <sup>147</sup>    | 2017 | BMC Cancer                    | 3.3 | Oncology                            | No funding   | 0/6 | 8                | 2003-2014 |                                                                                                     | Purine-like xanthine oxidase inhibitors - 2 types, non-purine-like xanthine oxidase inhibitors - 2 types                                                                                                                                                                                                       |                                   |
| 6  |                           |      |                               |     |                                     |              |     |                  |           |                                                                                                     |                                                                                                                                                                                                                                                                                                                |                                   |
| 7  |                           |      |                               |     |                                     |              |     |                  |           |                                                                                                     |                                                                                                                                                                                                                                                                                                                |                                   |
| 8  |                           |      | BMC Cardiovascular Disorders  | 1.8 | Cardiac & Cardiovascular Systems    | No funding   | 0/9 | 91               | 1973-2017 | Adults under treatment for any clinical condition                                                   |                                                                                                                                                                                                                                                                                                                | Placebo, no treatment             |
| 9  | Bredemeier <sup>148</sup> | 2018 |                               |     |                                     |              |     |                  |           | Patients with post-endoscopic retrograde cholangiopancreatography pancreatitis (PEP)                | Nonsteroidal anti-inflammatory drugs (NSAIDs) - 6 types                                                                                                                                                                                                                                                        |                                   |
| 10 |                           |      |                               |     |                                     |              |     |                  |           |                                                                                                     |                                                                                                                                                                                                                                                                                                                |                                   |
| 11 |                           |      | BMC Gastroenterology          | 2.7 | Gastroenterology & Hepatology       | Non-industry | 0/5 | 22               | 2003-2017 | Patients with invasive fungal infections                                                            |                                                                                                                                                                                                                                                                                                                | Placebo                           |
| 12 | Lyu <sup>149</sup>        | 2018 |                               |     |                                     |              |     |                  |           |                                                                                                     |                                                                                                                                                                                                                                                                                                                |                                   |
| 13 |                           |      | BMC Infectious Diseases       | 2.6 | Infectious Diseases                 | Non-industry | 0/6 | 16               | 2001-2016 | Patients undergoing total shoulder arthroplasty or reverse shoulder arthroplasty                    | Voriconazole                                                                                                                                                                                                                                                                                                   | Other antifungal agents - 7 types |
| 14 | Xing <sup>150</sup>       | 2017 |                               |     |                                     |              |     |                  |           |                                                                                                     |                                                                                                                                                                                                                                                                                                                |                                   |
| 15 |                           |      | BMC Musculoskeletal Disorders | 2.0 | Orthopedics; Rheumatology           | No funding   | 0/4 | 3                | 2015-2017 |                                                                                                     | Tranexamic acid                                                                                                                                                                                                                                                                                                | Placebo                           |
| 16 |                           |      |                               |     |                                     |              |     |                  |           |                                                                                                     | Pharmacological agents for traumatic brain injury – 14 types, pharmacological agents for stroke – 23 types, pharmacological agents for bacterial meningitis – 1 type, pharmacological agents for intracerebral haemorrhage – 6 types, pharmacological agents for aneurysmal subarachnoid hemorrhage – 19 types |                                   |
| 17 |                           |      |                               |     |                                     |              |     |                  |           | Patients with ischemic or hemorrhagic stroke, traumatic brain injury, or bacterial meningitis       |                                                                                                                                                                                                                                                                                                                | Unspecified control               |
| 18 |                           |      | BMC Neurology                 | 2.2 | Clinical Neurology                  | No funding   | 0/3 | 110 <sup>a</sup> | 1983-2015 | Patients with primary or recurrent pterygium undergoing surgical removal combined with toxic agents | Anti-fibrotic and anti-VEGF (vascular endothelial growth factor) medications - 3 types                                                                                                                                                                                                                         | Placebo - Network meta-analysis   |
| 19 | Beez <sup>152</sup>       | 2017 |                               |     |                                     |              |     |                  |           | Patients with acute coronary syndrome and patients who underwent percutaneous coronary intervention |                                                                                                                                                                                                                                                                                                                |                                   |
| 20 |                           |      | BMC Ophthalmology             | 1.8 | Ophtamology                         | No funding   | 0/7 | 32               | 1990-2016 |                                                                                                     |                                                                                                                                                                                                                                                                                                                |                                   |
| 21 | Zeng <sup>153</sup>       | 2017 |                               |     |                                     |              |     |                  |           |                                                                                                     |                                                                                                                                                                                                                                                                                                                |                                   |
| 22 |                           |      | BMC Pharmacology & Toxicology | 1.9 | Pharmacology & Pharmacy; Toxicology | Non-industry | 0/3 | 4                | 2013-2016 |                                                                                                     | Prasugrel                                                                                                                                                                                                                                                                                                      | Ticagrelor                        |
| 23 | Bundhun <sup>154</sup>    | 2017 |                               |     |                                     |              |     |                  |           |                                                                                                     |                                                                                                                                                                                                                                                                                                                |                                   |
| 24 |                           |      |                               |     |                                     |              |     |                  |           |                                                                                                     |                                                                                                                                                                                                                                                                                                                |                                   |
| 25 |                           |      |                               |     |                                     |              |     |                  |           |                                                                                                     |                                                                                                                                                                                                                                                                                                                |                                   |
| 26 |                           |      |                               |     |                                     |              |     |                  |           |                                                                                                     |                                                                                                                                                                                                                                                                                                                |                                   |
| 27 |                           |      |                               |     |                                     |              |     |                  |           |                                                                                                     |                                                                                                                                                                                                                                                                                                                |                                   |
| 28 |                           |      |                               |     |                                     |              |     |                  |           |                                                                                                     |                                                                                                                                                                                                                                                                                                                |                                   |
| 29 |                           |      |                               |     |                                     |              |     |                  |           |                                                                                                     |                                                                                                                                                                                                                                                                                                                |                                   |
| 30 |                           |      |                               |     |                                     |              |     |                  |           |                                                                                                     |                                                                                                                                                                                                                                                                                                                |                                   |
| 31 |                           |      |                               |     |                                     |              |     |                  |           |                                                                                                     |                                                                                                                                                                                                                                                                                                                |                                   |
| 32 |                           |      |                               |     |                                     |              |     |                  |           |                                                                                                     |                                                                                                                                                                                                                                                                                                                |                                   |
| 33 |                           |      |                               |     |                                     |              |     |                  |           |                                                                                                     |                                                                                                                                                                                                                                                                                                                |                                   |
| 34 |                           |      |                               |     |                                     |              |     |                  |           |                                                                                                     |                                                                                                                                                                                                                                                                                                                |                                   |
| 35 |                           |      |                               |     |                                     |              |     |                  |           |                                                                                                     |                                                                                                                                                                                                                                                                                                                |                                   |
| 36 |                           |      |                               |     |                                     |              |     |                  |           |                                                                                                     |                                                                                                                                                                                                                                                                                                                |                                   |
| 37 |                           |      |                               |     |                                     |              |     |                  |           |                                                                                                     |                                                                                                                                                                                                                                                                                                                |                                   |
| 38 |                           |      |                               |     |                                     |              |     |                  |           |                                                                                                     |                                                                                                                                                                                                                                                                                                                |                                   |
| 39 |                           |      |                               |     |                                     |              |     |                  |           |                                                                                                     |                                                                                                                                                                                                                                                                                                                |                                   |
| 40 |                           |      |                               |     |                                     |              |     |                  |           |                                                                                                     |                                                                                                                                                                                                                                                                                                                |                                   |
| 41 |                           |      |                               |     |                                     |              |     |                  |           |                                                                                                     |                                                                                                                                                                                                                                                                                                                |                                   |
| 42 |                           |      |                               |     |                                     |              |     |                  |           |                                                                                                     |                                                                                                                                                                                                                                                                                                                |                                   |
| 43 |                           |      |                               |     |                                     |              |     |                  |           |                                                                                                     |                                                                                                                                                                                                                                                                                                                |                                   |
| 44 |                           |      |                               |     |                                     |              |     |                  |           |                                                                                                     |                                                                                                                                                                                                                                                                                                                |                                   |
| 45 |                           |      |                               |     |                                     |              |     |                  |           |                                                                                                     |                                                                                                                                                                                                                                                                                                                |                                   |
| 46 |                           |      |                               |     |                                     |              |     |                  |           |                                                                                                     |                                                                                                                                                                                                                                                                                                                |                                   |
| 47 |                           |      |                               |     |                                     |              |     |                  |           |                                                                                                     |                                                                                                                                                                                                                                                                                                                |                                   |

1  
2  
3  
4  
5  
6  
7  
8  
9  
10  
11  
12  
13  
14  
15  
16  
17  
18  
19  
20  
21  
22  
23  
24  
25  
26  
27  
28  
29  
30  
31  
32  
33  
34  
35  
36  
37  
38  
39  
40  
41  
42  
43  
44  
45  
46  
47

|                               |       |                                                  |      |                                   |                           |      |    |           |                                                                                                              |                                                                                                        |                                                                                                                                                      |
|-------------------------------|-------|--------------------------------------------------|------|-----------------------------------|---------------------------|------|----|-----------|--------------------------------------------------------------------------------------------------------------|--------------------------------------------------------------------------------------------------------|------------------------------------------------------------------------------------------------------------------------------------------------------|
| Zhang <sup>155</sup>          | 2017  | BMC Psychiatry                                   | 2.4  | Psychiatry                        | No funding                | 0/11 | 47 | 2003-2015 | People with schizophrenia or related disorders that had a duration of treatment that was no more than 1 year | Antipsychotic drugs - 12 types                                                                         | Placebo - Network meta-analysis                                                                                                                      |
| Zhang <sup>156</sup>          | 2017  | BMC Pulmonary Medicine                           | 2.7  | Respiratory System                | No funding                | 0/5  | 19 | 1996-2016 | Patients with acute exacerbations of chronic obstructive pulmonary disease (COPD)                            | Antibiotics - 17 types                                                                                 | Placebo - Network meta-analysis                                                                                                                      |
| Zhang <sup>157</sup>          | 2017b | BMC Pulmonary Medicine                           | 2.7  | Respiratory System                | Non-industry              | 0/4  | 25 | 1993-2016 | Preterm infants                                                                                              | Corticosteroids                                                                                        | Placebo                                                                                                                                              |
| Ramos-Esquivel <sup>158</sup> | 2018  | Breast Cancer British Journal of Sports Medicine | 1.8  | Oncology; Obstetrics & Gynecology | No funding                | 0/4  | 3  | 2016-2017 | Post-menopausal women with metastatic HR-positive, HER2-negative breast cancer                               | Cyclin-dependent kinase 4/6 inhibitors - 3 types + aromatase inhibitor - 2 types                       | Aromatase inhibitors - 2 types                                                                                                                       |
| Zeng <sup>159</sup>           | 2018  | Sport Sciences                                   | 7.9  | Sport Sciences                    | Non-industry              | 0/12 | 36 | 1979-2016 | Patients with osteoarthritis in any joint                                                                    | Non-steroidal anti-inflammatory drugs - 9 types                                                        | Network meta-analysis FOLFOX (leucovorin + fluorouracil + oxaliplatin) + bevacizumab, FOLFIRI (leucovorin + fluorouracil + irinotecan) + bevacizumab |
| Shui <sup>160</sup>           | 2018  | Cellular Physiology and Biochemistry             | 5.5  | Cell Biology; Physiology          | Not reported              | 0/6  | 4  | 2015-2017 | Patients with metastatic colorectal cancer                                                                   | FOLFOXIRI (leucovorin + fluorouracil + oxaliplatin + irinotecan) + bevacizumab                         | Miltefosine, paromomycin, antimonial compounds - 2 types, pentamidine, sitamaquine                                                                   |
| Rodrigo <sup>161</sup>        | 2018  | Clinical Microbiology and Infection              | 5.4  | Infectious Diseases; Microbiology | No funding                | 0/4  | 28 | 1996-2017 | Patients with visceral leishmaniasis                                                                         | Amphotericin B                                                                                         | Placebo, nonsteroidal anti-inflammatory drugs (NSAIDs), disease modifying antirheumatic drugs (DMARDs)                                               |
| Wang <sup>162</sup>           | 2018  | Clinical Rheumatology                            | 2.1  | Rheumatology                      | Non-industry              | 0/3  | 25 | 2002-2014 | Patients with ankylosing spondylitis and non-radiographic axial spondyloarthritis                            | Tumor necrosis factor (TNF) inhibitors - 5 types, non-tumor necrosis factor (TNF) inhibitors - 2 types | Low molecular-weight heparin (LMWH) – 5 types, enoxaparin + vitamin K antagonists (VKA)                                                              |
| Hong <sup>163</sup>           | 2018  | Critical Reviews in Oncology / Hematology        | 4.5  | Oncology; Hematology              | No funding                | 1/5  | 13 | 1996-2015 | Adults with acute venous thromboembolism                                                                     | Proprotein convertase subtilisin/kexin type 9 gene inhibitors (PCSK9i)                                 | Rivaroxaban, unfractionated heparin (UFH)                                                                                                            |
| de Carvalho <sup>164</sup>    | 2018  | Diabetes Care                                    | 13.4 | Endocrinology & Metabolism        | Not reported <sup>f</sup> | 0/3  | 20 | 2012-2017 | Patients with familial or nonfamilial                                                                        |                                                                                                        | Placebo, placebo + other lipid-lowering therapy                                                                                                      |

|    |                            |      |                                            |      |                                               |              |                  |    |           |                                                                                                                                                                                                   |                                                                                                 |                                                      |
|----|----------------------------|------|--------------------------------------------|------|-----------------------------------------------|--------------|------------------|----|-----------|---------------------------------------------------------------------------------------------------------------------------------------------------------------------------------------------------|-------------------------------------------------------------------------------------------------|------------------------------------------------------|
| 1  |                            |      |                                            |      |                                               |              |                  |    |           |                                                                                                                                                                                                   |                                                                                                 |                                                      |
| 2  |                            |      |                                            |      |                                               |              |                  |    |           |                                                                                                                                                                                                   |                                                                                                 |                                                      |
| 3  |                            |      |                                            |      |                                               |              |                  |    |           |                                                                                                                                                                                                   |                                                                                                 |                                                      |
| 4  |                            |      |                                            |      |                                               |              |                  |    |           | hypercholesterolemi                                                                                                                                                                               |                                                                                                 |                                                      |
| 5  |                            |      | Digestive                                  |      |                                               |              |                  |    |           | a                                                                                                                                                                                                 |                                                                                                 |                                                      |
| 6  | Jaafar <sup>165</sup>      | 2018 | Diseases and Sciences                      | 2.8  | Gastroenterology & Hepatology                 | Not reported | 0/5              | 17 | 2000-2016 | Adults (18 and over) with organic or functional dyspepsia                                                                                                                                         | Rebamipide                                                                                      | Placebo, standard treatment, no treatment            |
| 7  |                            |      |                                            |      |                                               |              |                  |    |           | Patients with neurodegenerative movement disorders                                                                                                                                                |                                                                                                 |                                                      |
| 8  | Liu <sup>166</sup>         | 2018 | Drug Delivery                              | 3.1  | Pharmacology & Pharmacy                       | Not reported | 0/2              | 9  | 2002-2015 | Patients undergoing coronary angiography (CAG) or percutaneous coronary intervention (PCI)                                                                                                        | Riluzole                                                                                        | Placebo                                              |
| 9  |                            |      |                                            |      |                                               |              |                  |    |           |                                                                                                                                                                                                   |                                                                                                 |                                                      |
| 10 |                            |      |                                            |      |                                               |              |                  |    |           |                                                                                                                                                                                                   |                                                                                                 |                                                      |
| 11 |                            |      |                                            |      |                                               |              |                  |    |           |                                                                                                                                                                                                   |                                                                                                 |                                                      |
| 12 |                            |      | Drug Design, Development and Therapy       | 2.9  | Chemistry, Medicinal; Pharmacology & Pharmacy | Not reported | 0/5              | 9  | 2010-2016 | Adults (≥ 18 years) undergoing spinal anesthesia                                                                                                                                                  | Atorvastatin                                                                                    | Placebo                                              |
| 13 | Liu <sup>167</sup>         | 2018 |                                            |      |                                               |              |                  |    |           |                                                                                                                                                                                                   |                                                                                                 |                                                      |
| 14 |                            |      | Drug Design, Development and Therapy       | 2.9  | Chemistry, Medicinal; Pharmacology & Pharmacy | Not reported | 0/5              | 9  | 2009-2016 | Adults with traumatic brain injuries and depressive disorders                                                                                                                                     | Dexmedetomidine                                                                                 | Fentanyl                                             |
| 15 | Sun <sup>168</sup>         | 2017 |                                            |      |                                               |              |                  |    |           |                                                                                                                                                                                                   |                                                                                                 |                                                      |
| 16 |                            |      |                                            |      |                                               |              |                  |    |           |                                                                                                                                                                                                   |                                                                                                 |                                                      |
| 17 |                            |      |                                            |      |                                               |              |                  |    |           |                                                                                                                                                                                                   |                                                                                                 |                                                      |
| 18 |                            |      | East Asian Archives of Psychiatry          | None | Not applicable                                | Not reported | 0/2              | 4  | 2005-2010 | Adults with traumatic brain injuries and depressive disorders                                                                                                                                     | Antidepressants - 2 types                                                                       | Placebo                                              |
| 19 | Paraschakis <sup>169</sup> | 2017 | Emergency Medicine Journal                 | 2.0  | Emergency Medicine                            | No funding   | 0/8              | 4  | 2001-2016 | Patients taking acute antiemetic drugs                                                                                                                                                            | Diphenhydramine                                                                                 | Placebo                                              |
| 20 | D'Souza <sup>170</sup>     | 2018 |                                            |      |                                               |              |                  |    |           | Adult women with epithelial ovarian cancer, fallopian tube cancer, or primary peritoneal cancer who have achieved complete clinical remission after debulking surgery and first-line chemotherapy |                                                                                                 |                                                      |
| 21 |                            |      |                                            |      |                                               |              |                  |    |           |                                                                                                                                                                                                   |                                                                                                 |                                                      |
| 22 |                            |      |                                            |      |                                               |              |                  |    |           |                                                                                                                                                                                                   |                                                                                                 |                                                      |
| 23 |                            |      |                                            |      |                                               |              |                  |    |           |                                                                                                                                                                                                   |                                                                                                 |                                                      |
| 24 |                            |      |                                            |      |                                               |              |                  |    |           |                                                                                                                                                                                                   |                                                                                                 |                                                      |
| 25 |                            |      |                                            |      |                                               |              |                  |    |           |                                                                                                                                                                                                   |                                                                                                 |                                                      |
| 26 |                            |      |                                            |      |                                               |              |                  |    |           |                                                                                                                                                                                                   |                                                                                                 |                                                      |
| 27 |                            |      |                                            |      |                                               |              |                  |    |           |                                                                                                                                                                                                   |                                                                                                 |                                                      |
| 28 |                            |      | European Journal of Gynecological Oncology | 0.6  | Oncology; Obstetrics & Gynecology             | Not reported | Not reported/4   | 4  | 2004-2013 | Patients with chronic breathlessness                                                                                                                                                              | CA125-targeted antibody – 2 types                                                               | Placebo                                              |
| 29 | Mei <sup>171</sup>         | 2016 |                                            |      |                                               |              |                  |    |           |                                                                                                                                                                                                   |                                                                                                 |                                                      |
| 30 |                            |      | Respiratory Journal                        | 12.2 | Respiratory System                            | Non-industry | 3/9 <sup>a</sup> | 35 | 1982-2015 | Critically ill patients receiving stress ulcer prophylaxis (SUP)                                                                                                                                  | Opioids - 8 types                                                                               | Placebo                                              |
| 31 | Verberkt <sup>172</sup>    | 2017 | Expert Opinion on Pharmacotherapy          | 3.5  | Pharmacology & Pharmacy                       | No funding   | 0/3              | 51 | 1980-2016 | Patients undergoing coronary artery bypass surgery                                                                                                                                                | Antacids, proton pump inhibitors (PPI), histamine-2 receptor antagonists (H2RA), and sucralfate | Placebo - Network meta-analysis                      |
| 32 |                            |      |                                            |      |                                               |              |                  |    |           |                                                                                                                                                                                                   |                                                                                                 |                                                      |
| 33 |                            |      | Expert Review of Clinical Pharmacology     | 2.8  | Pharmacology & Pharmacy                       | No funding   | 0/4              | 5  | 1999-2012 | Patients undergoing coronary artery bypass surgery                                                                                                                                                | Lidocaine                                                                                       | Placebo                                              |
| 34 | Sridharan <sup>173</sup>   | 2018 |                                            |      |                                               |              |                  |    |           |                                                                                                                                                                                                   |                                                                                                 |                                                      |
| 35 |                            |      |                                            |      |                                               |              |                  |    |           |                                                                                                                                                                                                   |                                                                                                 |                                                      |
| 36 |                            |      | Expert Review of Clinical Pharmacology     | 2.8  | Pharmacology & Pharmacy                       | Non-industry | 0/4              | 14 | 2002-2017 | Patients with stable angina pectoris requiring elective percutaneous                                                                                                                              | Nicorandil                                                                                      | Placebo (saline, isosorbide dinitrate), no treatment |
| 37 | Habibi <sup>174</sup>      | 2018 |                                            |      |                                               |              |                  |    |           |                                                                                                                                                                                                   |                                                                                                 |                                                      |
| 38 |                            |      |                                            |      |                                               |              |                  |    |           |                                                                                                                                                                                                   |                                                                                                 |                                                      |
| 39 |                            |      |                                            |      |                                               |              |                  |    |           |                                                                                                                                                                                                   |                                                                                                 |                                                      |
| 40 | Li <sup>175</sup>          | 2018 |                                            |      |                                               |              |                  |    |           |                                                                                                                                                                                                   |                                                                                                 |                                                      |
| 41 |                            |      |                                            |      |                                               |              |                  |    |           |                                                                                                                                                                                                   |                                                                                                 |                                                      |
| 42 |                            |      |                                            |      |                                               |              |                  |    |           |                                                                                                                                                                                                   |                                                                                                 |                                                      |
| 43 |                            |      |                                            |      |                                               |              |                  |    |           |                                                                                                                                                                                                   |                                                                                                 |                                                      |
| 44 |                            |      |                                            |      |                                               |              |                  |    |           |                                                                                                                                                                                                   |                                                                                                 |                                                      |
| 45 |                            |      |                                            |      |                                               |              |                  |    |           |                                                                                                                                                                                                   |                                                                                                 |                                                      |
| 46 |                            |      |                                            |      |                                               |              |                  |    |           |                                                                                                                                                                                                   |                                                                                                 |                                                      |
| 47 |                            |      |                                            |      |                                               |              |                  |    |           |                                                                                                                                                                                                   |                                                                                                 |                                                      |





|    |                          |      |               |     |                                                     |          |      |                |           |                       |                            |                       |
|----|--------------------------|------|---------------|-----|-----------------------------------------------------|----------|------|----------------|-----------|-----------------------|----------------------------|-----------------------|
| 1  |                          |      |               |     |                                                     |          |      |                |           |                       |                            |                       |
| 2  |                          |      |               |     |                                                     |          |      |                |           |                       |                            |                       |
| 3  |                          |      | International |     |                                                     |          |      |                |           |                       |                            |                       |
| 4  |                          |      | Journal of    |     |                                                     |          |      |                |           |                       |                            |                       |
| 5  | Zhu <sup>189</sup>       | 2018 | Clinical      | 2.6 | Oncology                                            | Non-     | 0/7  | 35             | 2005-2016 | Cancer patients       | Anti-EGFR monoclonal       | Placebo, usual care   |
| 6  |                          |      | Oncology      |     |                                                     | industry |      |                |           |                       | antibodies (EGFR-MoAbs)    |                       |
| 7  |                          |      | International |     |                                                     |          |      |                |           |                       |                            |                       |
| 8  | Liu <sup>190</sup>       | 2018 | Journal of    | 1.8 | Neurosciences                                       | Not      | 0/2  | 4              | 2007-2016 | Patients with         | Lacosamide                 | Placebo               |
| 9  |                          |      | Neuroscience  |     |                                                     | reported |      |                |           | seizures              |                            |                       |
| 10 |                          |      |               |     |                                                     |          |      |                |           | Patients with         |                            |                       |
| 11 | Coccolini <sup>191</sup> | 2018 | International | 2.7 | Surgery                                             | No       | 0/12 | 15             | 1993-2014 | advanced gastric and  | Neoadjuvant chemotherapy   | No neoadjuvant        |
| 12 |                          |      | Journal of    |     |                                                     | funding  |      |                |           | esophago-gastric      | (with surgery)             | chemotherapy (only    |
| 13 |                          |      | Surgery       |     |                                                     |          |      |                |           | cancer                |                            | surgery)              |
| 14 | Fan <sup>192</sup>       | 2018 | International | 2.7 | Surgery                                             | Non-     | 0/8  | 7              | 2005-2016 | Patients with         | Dexamethasone              | Placebo, no treatment |
| 15 |                          |      | Journal of    |     |                                                     | industry |      |                |           | scheduled total knee  |                            | ("nothing controlled  |
| 16 |                          |      | Surgery       |     |                                                     |          |      |                |           | arthroplasty          |                            | multimodal analgesia  |
| 17 |                          |      |               |     |                                                     |          |      |                |           | Patients with a       |                            | method")              |
| 18 |                          |      |               |     |                                                     |          |      |                |           | diagnosis of          |                            |                       |
| 19 | Li <sup>193</sup>        | 2018 | International | 2.7 | Surgery                                             | No       | 0/5  | 6              | 2008-2017 | symptomatic           | Lidocaine                  | Placebo, saline       |
| 20 |                          |      | Journal of    |     |                                                     | funding  |      |                |           | cholelithiasis and    |                            |                       |
| 21 |                          |      | Surgery       |     |                                                     |          |      |                |           | acute cholecystitis   |                            |                       |
| 22 |                          |      |               |     |                                                     |          |      |                |           | who prepared for      |                            |                       |
| 23 |                          |      |               |     |                                                     |          |      |                |           | laparoscopic          |                            |                       |
| 24 | Li <sup>194</sup>        | 2018 | International | 2.7 | Surgery                                             | No       | 0/4  | 17             | 1998-2017 | cholecystectomy       | Anaesthetic medications -  | No drug - Network     |
| 25 |                          |      | Journal of    |     |                                                     | funding  |      |                |           | Patients undergoing   | 12 types                   | meta-analysis         |
| 26 |                          |      | Surgery       |     |                                                     |          |      |                |           | anaesthesia as part   |                            |                       |
| 27 |                          |      |               |     |                                                     |          |      |                |           | of endoscopic         |                            |                       |
| 28 | Liu <sup>195</sup>       | 2018 | International | 2.7 | Surgery                                             | Non-     | 0/5  | 3 <sup>†</sup> | 2005-2017 | retrograde            | Tranexamic acid            | Aminocaproic acid     |
| 29 |                          |      | Journal of    |     |                                                     | industry |      |                |           | cholangiopancreatog   |                            |                       |
| 30 |                          |      | Surgery       |     |                                                     |          |      |                |           | raphy                 |                            |                       |
| 31 | Ran <sup>196</sup>       | 2018 | International | 2.7 | Surgery                                             | No       | 0/5  | 5              | 2002-2016 | Patients undergoing   | Hyaluronic acid            | Methylprednisolone    |
| 32 |                          |      | Journal of    |     |                                                     | funding  |      |                |           | total knee            |                            |                       |
| 33 |                          |      | Surgery       |     |                                                     |          |      |                |           | arthroplasty or total |                            |                       |
| 34 | Zhu <sup>198</sup>       | 2018 | International | 2.7 | Surgery                                             | Non-     | 0/5  | 6              | 2004-2017 | hip arthroplasty      | Ketamine                   | Saline                |
| 35 |                          |      | Journal of    |     |                                                     | industry |      |                |           | Patients with         |                            |                       |
| 36 |                          |      | Surgery       |     |                                                     |          |      |                |           | symptomatic knee      |                            |                       |
| 37 | Wagner <sup>199</sup>    | 2018 | International | 3.8 | Clinical Neurology;<br>Psychiatry                   | No       | 0/5  | 5              | 2002-2016 | osteoarthritis        | Second generation          | Placebo - Network     |
| 38 |                          |      | Journal of    |     |                                                     | funding  |      |                |           | hepatocellular        | antidepressants - 16 types | meta-analysis         |
| 39 |                          |      | Surgery       |     |                                                     |          |      |                |           | carcinoma             |                            |                       |
| 40 | Hickman <sup>200</sup>   | 2018 | International | 2.8 | Genetics &<br>Heredity; Obstetrics<br>& Gynecology; | No       | 0/5  | 10             | 2007-2016 | Adult patients        | Gonadotropin-releasing     | Standard treatment    |
| 41 |                          |      | Journal of    |     |                                                     | reported |      |                |           | prepared for          | hormone agonists (GnRHa)   | (chemotherapy only)   |
| 42 |                          |      | Assisted      |     |                                                     |          |      |                |           | laparoscopic          | - 7 types                  |                       |
| 43 |                          |      | Reproduction  |     |                                                     |          |      |                |           | cholecystectomy       |                            |                       |
| 44 |                          |      | and Genetics  |     |                                                     |          |      |                |           | Adults with major     |                            |                       |
| 45 |                          |      |               |     |                                                     |          |      |                |           | depressive disorder   |                            |                       |
| 46 |                          |      |               |     |                                                     |          |      |                |           |                       |                            |                       |
| 47 |                          |      |               |     |                                                     |          |      |                |           |                       |                            |                       |

|    |                             |      |                                                  |         |                                                                        |              |                |    |           |                                                                                                                                               |                                                                                                                                                                            |                                                                        |
|----|-----------------------------|------|--------------------------------------------------|---------|------------------------------------------------------------------------|--------------|----------------|----|-----------|-----------------------------------------------------------------------------------------------------------------------------------------------|----------------------------------------------------------------------------------------------------------------------------------------------------------------------------|------------------------------------------------------------------------|
| 1  |                             |      |                                                  |         |                                                                        |              |                |    |           |                                                                                                                                               |                                                                                                                                                                            |                                                                        |
| 2  |                             |      |                                                  |         |                                                                        |              |                |    |           |                                                                                                                                               |                                                                                                                                                                            |                                                                        |
| 3  |                             |      |                                                  |         | Reproductive                                                           |              |                |    |           |                                                                                                                                               |                                                                                                                                                                            |                                                                        |
| 4  |                             |      |                                                  | Biology |                                                                        |              |                |    |           | cancer undergoing                                                                                                                             |                                                                                                                                                                            |                                                                        |
| 5  |                             |      |                                                  |         |                                                                        |              |                |    |           | chemotherapy                                                                                                                                  |                                                                                                                                                                            |                                                                        |
| 6  |                             |      |                                                  |         |                                                                        |              |                |    |           |                                                                                                                                               | Programmed death 1 (PD-                                                                                                                                                    |                                                                        |
| 7  |                             |      |                                                  |         |                                                                        |              |                |    |           |                                                                                                                                               | 1)/programmed death                                                                                                                                                        |                                                                        |
| 8  | Luo <sup>201</sup>          | 2018 | Journal of Cancer Research and Clinical Oncology | 3.3     | Oncology                                                               | Non-industry | 0/4            | 8  | 2015-2017 | Patients with non-small-cell lung carcinoma                                                                                                   | ligand 1 (PD-L1) inhibitors - 3 types                                                                                                                                      | Chemotherapy - 2 types                                                 |
| 9  |                             |      | Journal of Cancer Research and Clinical Oncology |         |                                                                        |              |                |    |           |                                                                                                                                               |                                                                                                                                                                            |                                                                        |
| 10 |                             |      |                                                  |         |                                                                        |              |                |    |           | Patients with metastatic castration-resistant prostate cancer                                                                                 | Targeted agents - 16 types                                                                                                                                                 | Placebo - Network meta-analysis                                        |
| 11 | Wang <sup>202</sup>         | 2018 | Journal of Cancer Research and Therapeutics      | 3.3     | Oncology                                                               | Non-industry | 0/5            | 26 | 2010-2017 |                                                                                                                                               |                                                                                                                                                                            |                                                                        |
| 12 |                             |      |                                                  |         |                                                                        |              |                |    |           |                                                                                                                                               |                                                                                                                                                                            |                                                                        |
| 13 |                             |      |                                                  |         |                                                                        |              |                |    |           |                                                                                                                                               |                                                                                                                                                                            |                                                                        |
| 14 | Wang <sup>203</sup>         | 2018 |                                                  | 0.8     | Oncology                                                               | No funding   | 0/4            | 35 | 1997-2011 | Cancer patients with moderate to severe pain                                                                                                  | Fentanyl                                                                                                                                                                   | Morphine                                                               |
| 15 |                             |      |                                                  |         |                                                                        |              |                |    |           | Adults (18 years and over) undergoing any type of cardiac surgery                                                                             | Aspirin                                                                                                                                                                    | Placebo, discontinuation of aspirin greater than 7 days before surgery |
| 16 | Aboul-Hassan <sup>204</sup> | 2017 | Journal of Cardiac Surgery                       | 1.2     | Cardiac & Cardiovascular Systems; Surgery                              | No funding   | 0/8            | 12 | 1985-2016 |                                                                                                                                               |                                                                                                                                                                            |                                                                        |
| 17 |                             |      |                                                  |         |                                                                        |              |                |    |           |                                                                                                                                               |                                                                                                                                                                            |                                                                        |
| 18 |                             |      |                                                  |         |                                                                        |              |                |    |           |                                                                                                                                               |                                                                                                                                                                            |                                                                        |
| 19 |                             |      |                                                  |         |                                                                        |              |                |    |           |                                                                                                                                               |                                                                                                                                                                            |                                                                        |
| 20 |                             |      |                                                  |         |                                                                        |              |                |    |           |                                                                                                                                               |                                                                                                                                                                            |                                                                        |
| 21 | Wang <sup>205</sup>         | 2018 | Journal of Cardiovascular Surgery                | 1.2     | Cardiac & Cardiovascular Systems; Surgery; Peripheral Vascular Disease | Not reported | 0/6            | 5  | 1999-2010 | Patients undergoing isolated coronary artery bypass graft (CABG) surgery                                                                      | Statins - 3 types                                                                                                                                                          | No preoperative statin                                                 |
| 22 |                             |      |                                                  |         |                                                                        |              |                |    |           |                                                                                                                                               | Antiandrogens, insulin sensitizers, estrogen-progestin oral contraceptives pills (OCPs), OCPs + antiandrogen, OCPs + insulin sensitizer, antiandrogen + insulin sensitizer |                                                                        |
| 23 |                             |      |                                                  |         |                                                                        |              |                |    |           |                                                                                                                                               |                                                                                                                                                                            |                                                                        |
| 24 |                             |      |                                                  |         |                                                                        |              |                |    |           |                                                                                                                                               |                                                                                                                                                                            |                                                                        |
| 25 |                             |      |                                                  |         |                                                                        |              |                |    |           |                                                                                                                                               |                                                                                                                                                                            |                                                                        |
| 26 |                             |      |                                                  |         |                                                                        |              |                |    |           |                                                                                                                                               |                                                                                                                                                                            |                                                                        |
| 27 |                             |      |                                                  |         |                                                                        |              |                |    |           |                                                                                                                                               |                                                                                                                                                                            |                                                                        |
| 28 | Barrionuevo <sup>206</sup>  | 2018 | Journal of Clinical Endocrinology and Metabolism | 5.8     | Endocrinology & Metabolism                                             | Non-industry | 0/8            | 32 | 1989-2016 | Women with hirsutism                                                                                                                          |                                                                                                                                                                            | Placebo - Network meta-analysis                                        |
| 29 |                             |      |                                                  |         |                                                                        |              |                |    |           |                                                                                                                                               |                                                                                                                                                                            |                                                                        |
| 30 |                             |      |                                                  |         |                                                                        |              |                |    |           |                                                                                                                                               |                                                                                                                                                                            |                                                                        |
| 31 | Cui <sup>207</sup>          | 2018 | Journal of Clinical Pharmacy and Therapeutics    | 1.7     | Pharmacology & Pharmacy                                                | Not reported | 0/6            | 23 | 1993-2014 | Patients with type 2 diabetes                                                                                                                 | Statins - 6 types                                                                                                                                                          | Placebo - Network meta-analysis                                        |
| 32 |                             |      |                                                  |         |                                                                        |              |                |    |           |                                                                                                                                               |                                                                                                                                                                            |                                                                        |
| 33 |                             |      |                                                  |         |                                                                        |              |                |    |           |                                                                                                                                               |                                                                                                                                                                            |                                                                        |
| 34 | Sawyer <sup>208</sup>       | 2018 | Journal of Dermatological Treatment              | 2.1     | Dermatology                                                            | Industry     | 6/6            | 54 | 2001-2016 | Adults with moderate-to-severe chronic plaque-type psoriasis                                                                                  | Apremilast, biological therapies - 7 types                                                                                                                                 | Placebo - Network meta-analysis                                        |
| 35 |                             |      |                                                  |         |                                                                        |              |                |    |           |                                                                                                                                               |                                                                                                                                                                            |                                                                        |
| 36 |                             |      |                                                  |         |                                                                        |              |                |    |           |                                                                                                                                               |                                                                                                                                                                            |                                                                        |
| 37 |                             |      |                                                  |         |                                                                        |              |                |    |           |                                                                                                                                               |                                                                                                                                                                            |                                                                        |
| 38 |                             |      |                                                  |         |                                                                        |              |                |    |           |                                                                                                                                               |                                                                                                                                                                            |                                                                        |
| 39 |                             |      |                                                  |         |                                                                        |              |                |    |           |                                                                                                                                               |                                                                                                                                                                            |                                                                        |
| 40 | Markey <sup>209</sup>       | 2018 | Journal of Emergency Medicine                    | 1.2     | Emergency Medicine                                                     | Not reported | Not reported/3 | 11 | 1989-2004 | Patients with onset of atrial fibrillation (AF) within 48 h, who were hemodynamically stable and without evidence of acute coronary syndrome, | Flecainide                                                                                                                                                                 | Placebo, verapamil, and other active anti-dysrhythmics                 |
| 41 |                             |      |                                                  |         |                                                                        |              |                |    |           |                                                                                                                                               |                                                                                                                                                                            |                                                                        |
| 42 |                             |      |                                                  |         |                                                                        |              |                |    |           |                                                                                                                                               |                                                                                                                                                                            |                                                                        |
| 43 |                             |      |                                                  |         |                                                                        |              |                |    |           |                                                                                                                                               |                                                                                                                                                                            |                                                                        |
| 44 |                             |      |                                                  |         |                                                                        |              |                |    |           |                                                                                                                                               |                                                                                                                                                                            |                                                                        |
| 45 |                             |      |                                                  |         |                                                                        |              |                |    |           |                                                                                                                                               |                                                                                                                                                                            |                                                                        |
| 46 |                             |      |                                                  |         |                                                                        |              |                |    |           |                                                                                                                                               |                                                                                                                                                                            |                                                                        |
| 47 |                             |      |                                                  |         |                                                                        |              |                |    |           |                                                                                                                                               |                                                                                                                                                                            |                                                                        |

1  
2  
3  
4  
5  
6  
7  
8  
9  
10  
11  
12  
13  
14  
15  
16  
17  
18  
19  
20  
21  
22  
23  
24  
25  
26  
27  
28  
29  
30  
31  
32  
33  
34  
35  
36  
37  
38  
39  
40  
41  
42  
43  
44  
45  
46  
47

|                            |      |                                                     |     |                                            |              |                   |                 |           |                                                                                     |                                                                            |                                                    |
|----------------------------|------|-----------------------------------------------------|-----|--------------------------------------------|--------------|-------------------|-----------------|-----------|-------------------------------------------------------------------------------------|----------------------------------------------------------------------------|----------------------------------------------------|
|                            |      |                                                     |     |                                            |              |                   |                 |           | congestive heart failure, or structural heart disease                               |                                                                            |                                                    |
|                            |      |                                                     |     |                                            |              |                   |                 |           | Adult patients (18 years and over) taking low-dose aspirin for a minimum of 2 weeks | Proton-pump inhibitors (PPIs) - 5 types                                    | Histamine-2 receptor antagonists (H2RAs) - 2 types |
| Szabó <sup>210</sup>       | 2017 | Journal of Gastrointestinal and Liver Diseases      | 2.0 | Gastroenterology & Hepatology              | Not reported | 0/15              | 10 <sup>w</sup> | 2009-2016 | Patients with histologically confirmed solid cancer                                 |                                                                            |                                                    |
| Su <sup>211</sup>          | 2018 | Journal of Immunology Research                      | 3.3 | Immunology                                 | Non-industry | 0/6               | 15              | 2011-2017 |                                                                                     | Immune checkpoint inhibitors (ICIs) - 5 types                              | Placebo or chemotherapy                            |
| Chen <sup>212</sup>        | 2018 | Journal of Interventional Cardiac Electrophysiology | 1.5 | Cardiac & Cardiovascular Systems           | Non-industry | 0/9               | 8               | 2006-2017 | Patients with persistent atrial fibrillation                                        | Antiarrhythmic drugs                                                       | Catheter ablation                                  |
| Chen <sup>213</sup>        | 2017 | Journal of Orthopaedic Surgery and Research         | 1.6 | Orthopedics                                | No funding   | 0/4               | 6               | 2008-2014 | Patients undergoing knee arthroscopy                                                | Midazolam                                                                  | Placebo                                            |
| Li <sup>214</sup>          | 2018 | Journal of Orthopaedic Surgery and Research         | 1.6 | Orthopedics                                | Not reported | 0/5               | 3 <sup>x</sup>  | 2002-2017 | Patients undergoing a primary total hip or knee arthroplasty                        | Aminocaproic acid                                                          | Placebo or no treatment                            |
| Luo <sup>215</sup>         | 2018 | Journal of Orthopaedic Surgery and Research         | 1.6 | Orthopedics                                | Not reported | 0/4               | 3 <sup>y</sup>  | 2002-2017 | Patients treated with spine surgery                                                 | Tranexamic acid                                                            | Control (not specified)                            |
| Ma <sup>216</sup>          | 2018 | Journal of Orthopaedic Surgery and Research         | 1.6 | Orthopedics                                | No funding   | 0/4               | 4               | 1991-2015 | Patients who underwent hip surgery                                                  | Naproxen                                                                   | Placebo                                            |
| He <sup>217</sup>          | 2018 | Journal of Psychiatric Research                     | 4.0 | Psychiatry                                 | Non-industry | 0/8               | 22              | 2009-2015 | Patients with a primary diagnosis of major depressive disorder (MDD)                | Vortioxetine, levomilnacipran, vilazodone                                  | Placebo                                            |
| Wang <sup>218</sup>        | 2018 | Journal of Stroke & Cerebrovascular Diseases        | 1.6 | Neurosciences; Peripheral Vascular Disease | Non-industry | 4/8               | 6               | 2003-2013 | Asian patients with non-valvular atrial fibrillation (AF)                           | Warfarin, direct oral anticoagulants (DOACs) - 5 types                     | Network meta-analysis                              |
| Dhana <sup>219</sup>       | 2018 | Journal of the American Academy of Dermatology      | 6.9 | Dermatology                                | No funding   | 0/6               | 15              | 2000-2016 | People with scabies                                                                 | Permethrin                                                                 | Ivermectin                                         |
| Karatasakis <sup>220</sup> | 2017 | Journal of the American Heart Association           | 4.5 | Cardiac & Cardiovascular Systems           | Not reported | 3/12 <sup>z</sup> | 35              | 2012-2017 | Adults with hypercholesterolemia                                                    | Proprotein convertase subtilisin/kexin type 9 (PCSK9) inhibitors - 2 types | Placebo, ezetimibe, standard therapy               |

|    |                          |      |                 |      |                     |          |             |                 |            |                       |                       |                       |
|----|--------------------------|------|-----------------|------|---------------------|----------|-------------|-----------------|------------|-----------------------|-----------------------|-----------------------|
| 1  |                          |      |                 |      |                     |          |             |                 |            |                       |                       |                       |
| 2  |                          |      |                 |      |                     |          |             |                 |            |                       |                       |                       |
| 3  |                          |      | Journal of the  |      |                     |          |             |                 |            |                       |                       |                       |
| 4  |                          |      | European        |      |                     |          |             |                 |            |                       |                       |                       |
| 5  |                          |      | Academy of      |      |                     |          |             |                 |            | Adult patients (≥ 18) |                       |                       |
| 6  |                          |      | Dermatology and |      |                     | Non-     |             |                 |            | with moderate-to-     |                       |                       |
| 7  | Kuo <sup>221</sup>       | 2018 | Venereology     | 4.3  | Dermatology         | industry | 2/4         | 4               | 2012-2016  | severe plaque         | Tofacitinib           | Placebo               |
| 8  |                          |      | Journal of      |      |                     |          |             |                 |            |                       |                       |                       |
| 9  |                          |      | Traditional     |      |                     |          |             |                 |            |                       |                       |                       |
| 10 | Liu <sup>222</sup>       | 2016 | Chinese         | 0.9  | Integrative &       | Non-     | Not         | 16              | 2005-2015  | Patients with         | Methotrexate          | Sinomenine            |
| 11 |                          |      | Medicine        |      | Complementary       | industry | reported/6  |                 |            | rheumatoid arthritis  |                       |                       |
| 12 |                          |      |                 |      | Biochemistry &      |          |             |                 |            |                       |                       |                       |
| 13 |                          |      |                 |      | Molecular Biology;  |          |             |                 |            |                       |                       |                       |
| 14 |                          |      | Journal of      |      | Biotechnology &     |          |             |                 |            | Adult patients        |                       |                       |
| 15 | Zheng <sup>223</sup>     | 2017 | Zhejiang        | 1.8  | Applied             | Not      | 0/7         | 8               | 1990-2014  | undergoing cardiac    | Amiodarone, lidocaine | Placebo               |
| 16 |                          |      | University-     |      | Microbiology;       | reported |             |                 |            | aortic cross-clamp    |                       |                       |
| 17 |                          |      | SCIENCE B       |      | Medicine, Research  |          |             |                 |            | Patients with         |                       |                       |
| 18 |                          |      |                 |      | & Experimental      |          |             |                 |            | isoniazid-resistant,  |                       | Usual care (REZ =     |
| 19 | Fregonese <sup>224</sup> | 2018 | Lancet          | 21.5 | Critical Care       | Non-     | 0/57        | 2               | 2010-2014  | rifampicin-           | Fluoroquinolone,      | rifampicin,           |
| 20 |                          |      | Respiratory     |      | Medicine;           | industry |             |                 | 2010-      | susceptible           | streptomycin          | ethambutol,           |
| 21 |                          |      | Medicine        |      | Respiratory System  |          |             |                 | 2010-      | tuberculosis          |                       | pyrazinamide)         |
| 22 |                          |      |                 |      |                     |          |             |                 | Unpublishe |                       |                       |                       |
| 23 | Bornstein <sup>225</sup> | 2018 | Neurological    | 2.3  | Clinical Neurology; | Not      | Not         | 9               | d          | Patients during early | Cerebrolysin          | Placebo               |
| 24 |                          |      | Sciences        |      | Neurosciences       | reported | reported/10 |                 |            | post-stroke period    | Bevacizumab,          | Placebo,              |
| 25 |                          |      |                 |      |                     |          |             |                 |            | Patients arranged for | bevacizumab +         | antimetabolite - 2    |
| 26 | Chen <sup>226</sup>      | 2018 | Ophthalmic      | 1.8  | Ophthalmology       |          | 0/4         | 3               | 2013-2015  | primary               | antimetabolite - 2    | types                 |
| 27 |                          |      | Research        |      | Anesthesiology;     |          |             |                 |            | trabeculectomy        |                       |                       |
| 28 | Han <sup>227</sup>       | 2017 | Pain Physician  | 2.6  | Clinical Neurology  | No       | 0/4         | 10              | 2004-2016  | Patients undergoing   | Gabapentin            | Placebo               |
| 29 |                          |      |                 |      |                     | funding  |             |                 |            | spinal surgery        |                       |                       |
| 30 |                          |      |                 |      |                     |          |             |                 |            | Adult patients        |                       |                       |
| 31 | Peng <sup>228</sup>      | 2017 | Pain Physician  | 2.6  | Anesthesiology;     | No       | 0/5         | 18              | 2004-2016  | undergoing surgical   | Dexmedetomidine +     | Opioids               |
| 32 |                          |      |                 |      | Clinical Neurology  | funding  |             |                 |            | procedures            | opioids               |                       |
| 33 |                          |      |                 |      | Chemistry,          |          |             |                 |            |                       |                       |                       |
| 34 |                          |      |                 |      | Medicinal;          |          |             |                 |            |                       |                       |                       |
| 35 |                          |      |                 |      | Chemistry,          |          |             |                 |            |                       |                       |                       |
| 36 |                          |      |                 |      | Multidisciplinary;  |          |             |                 |            |                       |                       |                       |
| 37 | Feng <sup>229</sup>      | 2016 | Pharmazie       | 1.0  | Pharmacology &      | Not      | 0/7         | 2 <sup>aa</sup> | 2011-2012  | Patients with         | V-5 immunitor         | Usual care            |
| 38 |                          |      |                 |      | Pharmacy            | reported |             |                 |            | tuberculosis          |                       | (chemotherapy), usual |
| 39 |                          |      |                 |      | Chemistry,          |          |             |                 |            |                       |                       | care + placebo        |
| 40 |                          |      |                 |      | Medicinal;          |          |             |                 |            |                       |                       |                       |
| 41 |                          |      |                 |      | Chemistry,          |          |             |                 |            |                       |                       |                       |
| 42 |                          |      |                 |      | Multidisciplinary;  |          |             |                 |            |                       |                       |                       |
| 43 |                          |      |                 |      | Pharmacology &      |          |             |                 |            |                       |                       |                       |
| 44 |                          |      |                 |      | Pharmacy            |          |             |                 |            |                       |                       |                       |
| 45 |                          |      |                 |      |                     |          |             |                 |            |                       |                       |                       |
| 46 |                          |      |                 |      |                     |          |             |                 |            |                       |                       |                       |
| 47 |                          |      |                 |      |                     |          |             |                 |            |                       |                       |                       |

|    |                            |      |                    |      |                    |          |      |    |           |                       |                              |                         |                       |
|----|----------------------------|------|--------------------|------|--------------------|----------|------|----|-----------|-----------------------|------------------------------|-------------------------|-----------------------|
| 1  |                            |      |                    |      |                    |          |      |    |           |                       |                              |                         |                       |
| 2  |                            |      |                    |      |                    |          |      |    |           |                       |                              |                         |                       |
| 3  |                            |      |                    |      |                    |          |      |    |           |                       |                              |                         |                       |
| 4  |                            |      |                    |      |                    |          |      |    |           | Adults with           |                              |                         |                       |
| 5  |                            |      |                    |      |                    |          |      |    |           | persistent depressive |                              |                         |                       |
| 6  |                            |      |                    |      |                    |          |      |    |           | disorder (DSM-5),     |                              |                         |                       |
| 7  |                            |      |                    |      |                    |          |      |    |           | chronic major         | Antidepressants - 6 types,   |                         |                       |
| 8  |                            |      |                    |      |                    |          |      |    |           | depression, recurrent | cognitive-behavioral         |                         |                       |
| 9  |                            |      |                    |      |                    |          |      |    |           | major depression      | analysis system of           |                         |                       |
| 10 |                            |      |                    |      |                    |          |      |    |           | with incomplete       | psychotherapy,               |                         |                       |
| 11 |                            |      | Psychotherapy      |      |                    |          |      |    |           | interepisode          | combination of               |                         |                       |
| 12 | Furukawa <sup>232</sup>    | 2018 | and Psychosomatics | 13.1 | Psychiatry;        | Non-     | 2/11 | 3  | 2000-2015 | recovery or           | antidepressants and          |                         |                       |
| 13 |                            |      |                    |      | Psychology         | industry |      |    |           | dysthymia (DSM-       | cognitive-behavioral         |                         | Network meta-analysis |
| 14 |                            |      |                    |      |                    |          |      |    |           | IV), or any           | analysis system of           |                         |                       |
| 15 | Liu <sup>233</sup>         | 2018 | Renal Failure      | 1.4  | Urology &          | Not      | 0/6  | 12 | 2006-2015 | corresponding         | psychotherapy                |                         |                       |
| 16 |                            |      |                    |      | Nephrology         | reported |      |    |           | conditions            |                              |                         |                       |
| 17 |                            |      |                    |      |                    |          |      |    |           | Adult patients with   | Uric acid-lowering therapy   | Placebo, usual therapy, |                       |
| 18 |                            |      |                    |      |                    |          |      |    |           | chronic kidney        | - 2 types                    | no treatment            |                       |
| 19 | Miravitlles <sup>234</sup> | 2017 | Respiratory        | 3.8  | Respiratory System | Industry | 3/4  | 10 | 2014-2016 | disease               |                              | Tiotropium or           |                       |
| 20 |                            |      | Research           |      |                    |          |      |    |           | Adults with a         |                              | olodaterol as           |                       |
| 21 |                            |      |                    |      |                    |          |      |    |           | history of chronic    |                              | monotherapy,            |                       |
| 22 |                            |      |                    |      |                    |          |      |    |           | obstructive           |                              | salmeterol +            |                       |
| 23 |                            |      |                    |      |                    |          |      |    |           | pulmonary disease     | Tiotropium + olodaterol      | fluticasone             |                       |
| 24 |                            |      |                    |      |                    |          |      |    |           | (COPD)                |                              | Corticosteroid + fast-  |                       |
| 25 |                            |      |                    |      |                    |          |      |    |           | Patients with         |                              | onset-acting β2-        |                       |
| 26 |                            |      |                    |      |                    |          |      |    |           | intermittent or mild  | Corticosteroids, fast-onset- | agonist                 |                       |
| 27 |                            |      |                    |      |                    |          |      |    |           | persistent asthma     | acting β2-agonists           |                         |                       |
| 28 |                            |      |                    |      |                    |          |      |    |           | Adults (18 years and  |                              |                         |                       |
| 29 |                            |      |                    |      |                    |          |      |    |           | over) with moderate   | Tumor necrosis factor        |                         |                       |
| 30 |                            |      |                    |      |                    |          |      |    |           | to severe psoriatic   | (antiTNF)-α inhibitors - 4   | Placebo - Network       |                       |
| 31 |                            |      |                    |      |                    |          |      |    |           | arthritis (PsA)       | types                        | meta-analysis           |                       |
| 32 |                            |      |                    |      |                    |          |      |    |           | Adult patients (18    |                              |                         |                       |
| 33 |                            |      |                    |      |                    |          |      |    |           | years and over)       |                              |                         |                       |
| 34 |                            |      |                    |      |                    |          |      |    |           | treated for the       |                              |                         |                       |
| 35 |                            |      |                    |      |                    |          |      |    |           | secondary             |                              |                         |                       |
| 36 |                            |      |                    |      |                    |          |      |    |           | prevention of         |                              |                         |                       |
| 37 |                            |      |                    |      |                    |          |      |    |           | cardiovascular,       |                              |                         |                       |
| 38 |                            |      |                    |      |                    |          |      |    |           | peripheral vascular,  |                              |                         |                       |
| 39 |                            |      |                    |      |                    |          |      |    |           | and cerebrovascular   | Proton pump inhibitors       | Thienopyridines - 2     |                       |
| 40 |                            |      |                    |      |                    |          |      |    |           | disease               | (PPI) + thienopyridines      | types                   |                       |
| 41 |                            |      |                    |      |                    |          |      |    |           | Adults (18 and over)  |                              |                         |                       |
| 42 |                            |      |                    |      |                    |          |      |    |           | undergoing            |                              |                         |                       |
| 43 |                            |      |                    |      |                    |          |      |    |           | gastrointestinal      |                              |                         |                       |
| 44 |                            |      |                    |      |                    |          |      |    |           | endoscopy             | Midazolam                    | Propofol                |                       |
| 45 |                            |      |                    |      |                    |          |      |    |           | Asian and non-        |                              |                         |                       |
| 46 |                            |      |                    |      |                    |          |      |    |           | Asian adults (18      |                              |                         |                       |
| 47 |                            |      |                    |      |                    |          |      |    |           | years and older)      |                              |                         |                       |
|    |                            |      |                    |      |                    |          |      |    |           | with acute venous     | Direct oral anticoagulants   | Vitamin K antagonists   |                       |
|    |                            |      |                    |      |                    |          |      |    |           | thromboembolism       | (DOACs) - 4 types            | (VKAs), heparin         |                       |
|    |                            |      |                    |      |                    |          |      |    |           | HIV-positive people   | Influenza vaccine, Placebo   | Network meta-analysis   |                       |

**Multidisciplinary sciences (n = 10)**

|                            |      |                         |     |                                   |              |                |                  |           |                                                                                                                    |                                   |                                                                            |
|----------------------------|------|-------------------------|-----|-----------------------------------|--------------|----------------|------------------|-----------|--------------------------------------------------------------------------------------------------------------------|-----------------------------------|----------------------------------------------------------------------------|
| Chen <sup>241</sup>        | 2018 | Medical Science Monitor | 1.9 | Medicine, Research & Experimental | Non-industry | 0/5            | 20 <sup>cc</sup> | 2000-2016 | Patients with essential hypertension Adult patients (over 18 years old) that underwent the extraction of any tooth | Anti-hypertensive drugs - 8 types | Acupuncture                                                                |
| Arteagoitia <sup>242</sup> | 2018 | PLOS ONE                | 2.8 | Multidisciplinary Sciences        | No funding   | 0/3            | 8                | 1989-2015 | Adults with osteoarthritis or rheumatoid arthritis of the knee or hip                                              | Chlorhexidine                     | Placebo, standard treatment                                                |
| Feng <sup>243</sup>        | 2018 | PLOS ONE                | 2.8 | Multidisciplinary Sciences        | No funding   | 0/4            | 9                | 2002-2009 | Pediatric surgical patients                                                                                        | Etoricoxib                        | Placebo, other non-steroidal anti-inflammatory drugs (NSAIDs) - 2 included |
| Kawakami <sup>244</sup>    | 2018 | PLOS ONE                | 2.8 | Multidisciplinary Sciences        | Non-industry | 0/5            | 6                | 2007-2017 | Adults (18 years and over) diagnosed with generalized anxiety disorder (GAD)                                       | Magnesium                         | Placebo, no treatment                                                      |
| Li <sup>245</sup>          | 2018 | PLOS ONE                | 2.8 | Multidisciplinary Sciences        | Non-industry | 0/7            | 8                | 2007-2014 | Patients with hypertension and chronic kidney disease stage 3 to 5 and dialysis                                    | Duloxetine                        | Placebo                                                                    |
| Lin <sup>246</sup>         | 2017 | PLOS ONE                | 2.8 | Multidisciplinary Sciences        | Non-industry | 0/6            | 21               | 1992-2012 | Adults (19 years and over) undergoing cardiac surgery                                                              | Calcium channel blockers          | Angiotensin-converting enzyme inhibitors, angiotensin receptor blockers    |
| Ling <sup>247</sup>        | 2018 | PLOS ONE                | 2.8 | Multidisciplinary Sciences        | Non-industry | Not reported/6 | 9                | 2003-2017 | Cancer patients                                                                                                    | Dexmedetomidine                   | Propofol, morphine, placebo                                                |
| Rohner <sup>248</sup>      | 2017 | PLOS ONE                | 2.8 | Multidisciplinary Sciences        | Non-industry | 2/7            | 94               | 1993-2014 | Patients with atrial fibrillation or atrial flutter                                                                | Erythropoiesis-stimulating agents | Usual care                                                                 |
| Sethi <sup>249</sup>       | 2018 | PLOS ONE                | 2.8 | Multidisciplinary Sciences        | No funding   | 0/6            | 28               | 1986-2017 | Post renal transplant patients                                                                                     | Digoxin                           | Placebo, no intervention, beta blockers, calcium antagonists, amiodarone   |
| Wolf <sup>250</sup>        | 2018 | PLOS ONE                | 2.8 | Multidisciplinary Sciences        | Industry     | 1/9            | 13               | 2002-2016 |                                                                                                                    | mTOR-inhibitors - 2 types         | Calcineurin-inhibitors                                                     |

<sup>a</sup>Only 3 studies reported that authors were employed by industry and therefore we included them as ties for the purposes of this table; <sup>b</sup>11/12 included RCTs had a drug arm; <sup>c</sup>33/38 included RCTs had a drug arm; <sup>d</sup>4/14 included RCTs had a drug arm; <sup>e</sup>One author reported pharmaceutical company employment; <sup>f</sup>9/11 included RCTs had a drug arm; <sup>g</sup>71/120 included studies were RCTs; <sup>h</sup>24/25 included studies were RCTs; <sup>i</sup>Meta-analysis funding sources reported as 'None, Other' we coded as no study funding; <sup>j</sup>10/27 included RCTs had a drug arm; <sup>k</sup>Flow chart indicates that 0 RCTs were included in the quantitative synthesis, but 2 RCTs were quantitatively synthesized and 13 were included; <sup>l</sup>Declarations of interest were provided for only 3 out of 5 meta-analysis authors; <sup>m</sup>24/31 included RCTs had a drug arm; <sup>n</sup>103/106 included RCTs had a drug arm; <sup>o</sup>3/5 included RCTs had a drug arm; <sup>p</sup>34/60 included RCTs had a drug arm; <sup>q</sup>110/123 included RCTs had an eligible drug arm; <sup>r</sup>Salary was reported under 'funding' but they did not specify whether there was any funding for the study itself; <sup>s</sup>ICMJE forms only provided for 5/9 authors; <sup>t</sup>3/4 included studies were RCTs; <sup>u</sup>4/11 included studies were RCTs; <sup>v</sup>Four authors reported financial ties with a pharmaceutical company and employment by Symmetron, a company that provides health economic research services to pharmaceutical companies, and two authors reported employment by a pharmaceutical company; <sup>w</sup>10/12 included studies were RCTs; <sup>x</sup>3/7 included studies were RCTs; <sup>y</sup>3/4 included studies were RCTs; <sup>z</sup> Of the 3 authors that reported financial ties, one also reported industry employment; <sup>aa</sup>2/4 included studies were RCTs; <sup>bb</sup>14/30 included studies were RCTs; <sup>cc</sup>20/30 included studies were RCTs with a drug arm

eTable2. – Detailed reporting of study funding sources (F), author-industry financial ties (T), and author-industry employment (E) form included RCTs

| First Author                      | Year | Journal                                 | Funding Sources of Included Trials Reported in Meta-analysis? | Author-Industry Financial Ties of Included Trials Reported in Meta-analysis? | Author-Industry Employment of Included Trials Reported in Meta-analysis? | Location Reported |                              |                                    |                                                                                           |   | Abstract | Lay summary | Online appendix |
|-----------------------------------|------|-----------------------------------------|---------------------------------------------------------------|------------------------------------------------------------------------------|--------------------------------------------------------------------------|-------------------|------------------------------|------------------------------------|-------------------------------------------------------------------------------------------|---|----------|-------------|-----------------|
|                                   |      |                                         |                                                               |                                                                              |                                                                          | Risk of Bias Text | Risk of Bias Figure or Table | Main Text, Other than Risk of Bias | Other in Main Document (Characteristics of Included Studies Table, other table, footnote) |   |          |             |                 |
| <b>Cochrane Reviews (n = 107)</b> |      |                                         |                                                               |                                                                              |                                                                          |                   |                              |                                    |                                                                                           |   |          |             |                 |
| Abdel-Rahman <sup>1</sup>         | 2018 | Cochrane Database of Systematic Reviews | Full                                                          | No                                                                           | No                                                                       | F                 | F                            |                                    | F                                                                                         |   | F        | F           |                 |
| Adams <sup>2</sup>                | 2018 | Cochrane Database of Systematic Reviews | Full                                                          | No                                                                           | No                                                                       | F                 |                              | F                                  | F                                                                                         |   |          |             |                 |
| Agabio <sup>3</sup>               | 2018 | Cochrane Database of Systematic Reviews | Full                                                          | Partial                                                                      | No                                                                       |                   |                              | F, T                               | F, T                                                                                      |   |          | F           |                 |
| Al-Shahi Salman <sup>4</sup>      | 2018 | Cochrane Database of Systematic Reviews | Partial                                                       | No                                                                           | No                                                                       |                   |                              | F                                  | F                                                                                         |   |          |             |                 |
| Alabed <sup>5</sup>               | 2018 | Cochrane Database of Systematic Reviews | Partial                                                       | No                                                                           | Partial                                                                  |                   |                              |                                    | F, E                                                                                      |   |          |             |                 |
| Allegretti <sup>6</sup>           | 2017 | Cochrane Database of Systematic Reviews | Full                                                          | No                                                                           | No                                                                       | F                 | F                            |                                    |                                                                                           |   | F        | F           |                 |
| Arechabala <sup>7</sup>           | 2018 | Cochrane Database of Systematic Reviews | Full                                                          | Partial                                                                      | Partial                                                                  | F                 | F, E                         | F, T                               | F, T, E                                                                                   |   |          | F           |                 |
| Baandrup <sup>8</sup>             | 2018 | Cochrane Database of Systematic Reviews | Full                                                          | Full                                                                         | Partial                                                                  | F                 | F                            | F                                  | F, T, E                                                                                   |   |          | F           |                 |
| Bala <sup>9</sup>                 | 2018 | Cochrane Database of Systematic Reviews | Full                                                          | No                                                                           | No                                                                       | F                 |                              |                                    | F                                                                                         |   |          |             |                 |
| Barbato <sup>10</sup>             | 2018 | Cochrane Database of Systematic Reviews | No                                                            | No                                                                           | No                                                                       |                   |                              |                                    |                                                                                           |   |          |             |                 |
| Bergman <sup>11</sup>             | 2018 | Cochrane Database of Systematic Reviews | Full                                                          | Partial                                                                      | No                                                                       |                   |                              |                                    | F, T                                                                                      |   |          |             |                 |
| Bighelli <sup>12</sup>            | 2018 | Cochrane Database of Systematic Reviews | Full                                                          | Full                                                                         | Partial                                                                  | F                 | F, T, E                      | F                                  | F, T, E                                                                                   | F |          | F           |                 |
| Birks <sup>13</sup>               | 2018 | Cochrane Database of Systematic Reviews | Full                                                          | Partial                                                                      | No                                                                       |                   |                              | F                                  | F, T                                                                                      | F |          |             |                 |
| Boyapati <sup>14</sup>            | 2018 | Cochrane Database of Systematic Reviews | No                                                            | No                                                                           | No                                                                       |                   |                              |                                    |                                                                                           |   |          |             |                 |
| Brown <sup>15</sup>               | 2018 | Cochrane Database of Systematic Reviews | Partial                                                       | Partial                                                                      | No                                                                       | F                 | F                            | F                                  | F, T                                                                                      | F |          | F           |                 |
| Bruins Slot <sup>16</sup>         | 2018 | Cochrane Database of Systematic Reviews | Full                                                          | No                                                                           | No                                                                       |                   |                              |                                    | F                                                                                         |   |          |             |                 |
| Bryan <sup>17</sup>               | 2017 | Cochrane Database of Systematic Reviews | Partial                                                       | No                                                                           | No                                                                       |                   |                              |                                    | F                                                                                         |   |          |             |                 |



1  
2  
3  
4  
5  
6  
7  
8  
9  
10  
11  
12  
13  
14  
15  
16  
17  
18  
19  
20  
21  
22  
23  
24  
25  
26  
27  
28  
29  
30  
31  
32  
33  
34  
35  
36  
37  
38  
39  
40  
41  
42  
43  
44  
45  
46  
47

|                              |      |                                         |                      |                      |         |  |      |      |         |
|------------------------------|------|-----------------------------------------|----------------------|----------------------|---------|--|------|------|---------|
| Bryant-Smith <sup>18</sup>   | 2018 | Cochrane Database of Systematic Reviews | Full                 | No                   | No      |  |      |      | F       |
| Burry <sup>19</sup>          | 2018 | Cochrane Database of Systematic Reviews | Full                 | No                   | No      |  | F    | F    | F       |
| Campschroer <sup>20</sup>    | 2018 | Cochrane Database of Systematic Reviews | Full                 | Full                 | No      |  |      |      | F, T    |
| Candy <sup>21</sup>          | 2018 | Cochrane Database of Systematic Reviews | Full                 | No                   | No      |  |      | F    | F       |
| Chiew <sup>22</sup>          | 2018 | Cochrane Database of Systematic Reviews | No                   | No                   | No      |  |      |      |         |
| Das <sup>23</sup>            | 2018 | Cochrane Database of Systematic Reviews | Full                 | No                   | No      |  |      | F    | F F     |
| Demicheli <sup>24</sup>      | 2018 | Cochrane Database of Systematic Reviews | Full <sup>a</sup>    | Partial              | Partial |  |      |      | F, T, E |
| Demicheli <sup>25</sup>      | 2018 | Cochrane Database of Systematic Reviews | No                   | No                   | No      |  |      |      |         |
| Di Nisio <sup>26</sup>       | 2018 | Cochrane Database of Systematic Reviews | Partial              | Partial              | No      |  |      |      | F, T    |
| El-Sayeh <sup>27</sup>       | 2018 | Cochrane Database of Systematic Reviews | Full                 | No                   | No      |  | F    |      | F       |
| Engelen <sup>28</sup>        | 2018 | Cochrane Database of Systematic Reviews | No                   | No                   | No      |  |      |      |         |
| Eshun-Wilson <sup>29</sup>   | 2018 | Cochrane Database of Systematic Reviews | Full                 | Full                 | No      |  |      |      | F, T    |
| Essali <sup>30</sup>         | 2018 | Cochrane Database of Systematic Reviews | Full                 | No                   | No      |  |      |      | F       |
| Everitt <sup>31</sup>        | 2018 | Cochrane Database of Systematic Reviews | Partial              | Partial              | No      |  | F, T | F, T | F F, T  |
| Fanshawe <sup>32</sup>       | 2017 | Cochrane Database of Systematic Reviews | No                   | No                   | No      |  |      |      |         |
| Franik <sup>33</sup>         | 2018 | Cochrane Database of Systematic Reviews | Full                 | Partial              | No      |  |      |      | F, T    |
| González <sup>34</sup>       | 2018 | Cochrane Database of Systematic Reviews | Full                 | No                   | No      |  |      |      | F       |
| Grabosch <sup>35</sup>       | 2018 | Cochrane Database of Systematic Reviews | No                   | No                   | No      |  |      |      |         |
| Graves <sup>36</sup>         | 2018 | Cochrane Database of Systematic Reviews | Partial <sup>b</sup> | No                   | No      |  |      |      | F       |
| Haas <sup>37</sup>           | 2018 | Cochrane Database of Systematic Reviews | Full                 | Full                 | No      |  |      | F, T | F, T    |
| Hakoum <sup>38</sup>         | 2018 | Cochrane Database of Systematic Reviews | Full                 | Full                 | No      |  |      |      | F, T    |
| Heras-Mosteiro <sup>39</sup> | 2017 | Cochrane Database of Systematic Reviews | Partial <sup>c</sup> | Partial <sup>d</sup> | Partial |  |      |      | F, T, E |
| Janmaat <sup>40</sup>        | 2017 | Cochrane Database of Systematic Reviews | No                   | No                   | No      |  |      |      |         |
| Jefferson <sup>41</sup>      | 2018 | Cochrane Database of Systematic Reviews | Full                 | No                   | No      |  |      |      | F       |
| Jung <sup>42</sup>           | 2017 | Cochrane Database of Systematic Reviews | Full                 | Full                 | Partial |  |      | F, T | F, T, E |



|    |                                |      |                      |         |                      |         |         |         |      |   |         |      |
|----|--------------------------------|------|----------------------|---------|----------------------|---------|---------|---------|------|---|---------|------|
| 1  |                                |      |                      |         |                      |         |         |         |      |   |         |      |
| 2  |                                |      |                      |         |                      |         |         |         |      |   |         |      |
| 3  |                                |      | Cochrane Database of |         |                      |         |         |         |      |   |         |      |
| 4  | Norman <sup>68</sup>           | 2018 | Systematic Reviews   | Full    | No                   | Partial |         |         | F    |   | F, E    |      |
| 5  | Normansell <sup>69</sup>       | 2018 | Cochrane Database of | Full    | No <sup>h</sup>      | No      |         |         | F    |   | F       |      |
| 6  |                                |      | Systematic Reviews   |         |                      |         |         |         |      |   |         |      |
| 7  | Novoa <sup>70</sup>            | 2018 | Cochrane Database of | Full    | Partial <sup>h</sup> | No      | F       | F       |      |   | F, T    | F    |
| 8  |                                |      | Systematic Reviews   |         |                      |         |         |         |      |   |         |      |
| 9  | Ohlsson <sup>71</sup>          | 2017 | Cochrane Database of | Partial | No                   | No      |         |         | F    |   | F       |      |
| 10 |                                |      | Systematic Reviews   |         |                      |         |         |         |      |   |         |      |
| 11 | Ostinelli <sup>72</sup>        | 2018 | Cochrane Database of | Full    | No                   | No      |         |         | F    | F |         |      |
| 12 |                                |      | Systematic Reviews   | Partial | Partial              | No      | F       | F, T    |      | F |         |      |
| 13 | Ostinelli <sup>73</sup>        | 2018 | Cochrane Database of | Full    | Partial              | No      | F       | F, T    |      | F |         |      |
| 14 | Ostuzzi <sup>74</sup>          | 2018 | Systematic Reviews   | Full    | Partial              | No      | F       | F, T    |      | F |         |      |
| 15 | Parker <sup>75</sup>           | 2018 | Cochrane Database of | No      | No                   | No      |         |         |      |   |         |      |
| 16 |                                |      | Systematic Reviews   | Partial | Partial              | No      | F, T    | F, T    |      | F |         | F    |
| 17 | Pasquali <sup>76</sup>         | 2018 | Cochrane Database of | Full    | No                   | No      |         |         | F    |   | F       |      |
| 18 | Pike <sup>77</sup>             | 2018 | Systematic Reviews   | Full    | No                   | No      |         |         |      |   |         |      |
| 19 |                                |      | Cochrane Database of |         |                      |         |         |         |      |   |         |      |
| 20 | Rirash <sup>78</sup>           | 2017 | Systematic Reviews   | No      | No                   | No      |         |         |      |   |         |      |
| 21 |                                |      | Cochrane Database of |         |                      |         |         |         |      |   |         |      |
| 22 | Robertson <sup>79</sup>        | 2017 | Systematic Reviews   | No      | No                   | No      |         |         |      |   |         |      |
| 23 |                                |      | Cochrane Database of |         |                      |         |         |         |      |   |         |      |
| 24 | Romero <sup>80</sup>           | 2017 | Systematic Reviews   | Full    | No                   | No      | F       | F       | F    | F | F       | F    |
| 25 |                                |      | Cochrane Database of |         |                      |         |         |         |      |   |         |      |
| 26 | Rosumeck <sup>81</sup>         | 2018 | Systematic Reviews   | Full    | Full                 | No      |         |         |      |   | F, T    |      |
| 27 |                                |      | Cochrane Database of |         |                      |         |         |         |      |   |         |      |
| 28 | Rüschen <sup>82</sup>          | 2018 | Systematic Reviews   | Full    | Full                 | No      |         |         | F, T |   | F, T    |      |
| 29 |                                |      | Cochrane Database of |         |                      |         |         |         |      |   |         |      |
| 30 | Ruthirakuhan <sup>83</sup>     | 2018 | Systematic Reviews   | Full    | No                   | Partial |         |         | F    |   | F, E    |      |
| 31 |                                |      | Cochrane Database of |         |                      |         |         |         |      |   |         |      |
| 32 | Sankar <sup>84</sup>           | 2018 | Systematic Reviews   | No      | No                   | No      |         |         |      |   |         |      |
| 33 |                                |      | Cochrane Database of |         |                      |         |         |         |      |   |         |      |
| 34 | Schumann <sup>85</sup>         | 2018 | Systematic Reviews   | Full    | Partial              | Partial | F, T    |         | F    |   | F, T, E | F, T |
| 35 |                                |      | Cochrane Database of |         |                      |         |         |         |      |   |         |      |
| 36 | Simancas-Racines <sup>86</sup> | 2018 | Systematic Reviews   | Full    | Full                 | No      | F       | F       | F    |   | F, T    |      |
| 37 |                                |      | Cochrane Database of |         |                      |         |         |         |      |   |         |      |
| 38 | Smith <sup>87</sup>            | 2017 | Systematic Reviews   | Full    | Full                 | Full    | F, T, E | F, T, E |      |   |         |      |
| 39 |                                |      | Cochrane Database of |         |                      |         |         |         |      |   |         |      |
| 40 | Smith <sup>88</sup>            | 2018 | Systematic Reviews   | Full    | Full                 | No      |         |         | F, T |   | F, T    |      |
| 41 |                                |      | Cochrane Database of |         |                      |         |         |         |      |   |         |      |
| 42 | Soares-Weiser <sup>89</sup>    | 2018 | Systematic Reviews   | Partial | No                   | No      |         |         |      |   | F       |      |
| 43 |                                |      | Cochrane Database of |         |                      |         |         |         |      |   |         |      |
| 44 | Squizzato <sup>90</sup>        | 2017 | Systematic Reviews   | Full    | Partial <sup>i</sup> | No      | F       | F, T    | F    |   |         | F    |
| 45 |                                |      | Cochrane Database of |         |                      |         |         |         |      |   |         |      |
| 46 | St George <sup>91</sup>        | 2018 | Systematic Reviews   | Full    | Partial              | Partial | F, T    | F, T, E | F    |   | F, T, E |      |
| 47 |                                |      | Cochrane Database of |         |                      |         |         |         |      |   |         |      |
| 48 | Stern <sup>92</sup>            | 2017 | Systematic Reviews   | Full    | No                   | No      |         |         | F    |   | F       | F    |

|    |                                  |      |                      |                      |         |         |      |         |         |      |   |  |
|----|----------------------------------|------|----------------------|----------------------|---------|---------|------|---------|---------|------|---|--|
| 1  |                                  |      |                      |                      |         |         |      |         |         |      |   |  |
| 2  |                                  |      |                      |                      |         |         |      |         |         |      |   |  |
| 3  |                                  |      | Cochrane Database of |                      |         |         |      |         |         |      |   |  |
| 4  | Sturman <sup>93</sup>            | 2017 | Systematic Reviews   | Full                 | Full    | No      | F, T | F, T    | F, T    |      |   |  |
| 5  | Tammenmaa-<br>Aho <sup>94</sup>  | 2018 | Cochrane Database of | Partial              | No      | No      |      |         |         | F    |   |  |
| 6  |                                  |      | Cochrane Database of |                      |         |         |      |         |         |      |   |  |
| 7  | Temmingh <sup>95</sup>           | 2018 | Systematic Reviews   | Full                 | Partial | Partial | F, T | F, T, E | F, T, E | F, T |   |  |
| 8  |                                  |      | Cochrane Database of |                      |         |         |      |         |         |      |   |  |
| 9  | Tenforde <sup>96</sup>           | 2018 | Systematic Reviews   | Full                 | Full    | No      | F, T | F, T    |         | F, T |   |  |
| 10 |                                  |      | Cochrane Database of |                      |         |         |      |         |         |      |   |  |
| 11 | Toews <sup>97</sup>              | 2018 | Systematic Reviews   | Full                 | Full    | Partial |      | F, E    | F       | F, T |   |  |
| 12 |                                  |      | Cochrane Database of |                      |         |         |      |         |         |      |   |  |
| 13 | Venekamp <sup>98</sup>           | 2018 | Systematic Reviews   | Full                 | Full    | No      |      |         | F       | F, T |   |  |
| 14 |                                  |      | Cochrane Database of |                      |         |         |      |         |         |      |   |  |
| 15 | Vermeij <sup>99</sup>            | 2018 | Systematic Reviews   | No                   | No      | No      |      |         |         |      |   |  |
| 16 |                                  |      | Cochrane Database of |                      |         |         |      |         |         |      |   |  |
| 17 | Vietto <sup>100</sup>            | 2018 | Systematic Reviews   | Full                 | No      | No      |      |         |         | F    | F |  |
| 18 |                                  |      | Cochrane Database of |                      |         |         |      |         |         |      |   |  |
| 19 | Wall <sup>101</sup>              | 2018 | Systematic Reviews   | Full                 | Full    | No      | F, T | F       | F       | F    |   |  |
| 20 |                                  |      | Cochrane Database of |                      |         |         |      |         |         |      |   |  |
| 21 | Weibel <sup>102</sup>            | 2018 | Systematic Reviews   | Full                 | No      | No      |      |         | F       | F    |   |  |
| 22 |                                  |      | Cochrane Database of |                      |         |         |      |         |         |      |   |  |
| 23 | Wright <sup>103</sup>            | 2018 | Systematic Reviews   | Partial              | Partial | No      | F    | F, T    |         |      |   |  |
| 24 |                                  |      | Cochrane Database of |                      |         |         |      |         |         |      |   |  |
| 25 | Xiao <sup>104</sup>              | 2018 | Systematic Reviews   | Full                 | No      | No      |      |         |         | F    |   |  |
| 26 |                                  |      | Cochrane Database of |                      |         |         |      |         |         |      |   |  |
| 27 | Zhang <sup>105</sup>             | 2017 | Systematic Reviews   | Full                 | No      | No      | F    | F       | F       | F    | F |  |
| 28 |                                  |      | Cochrane Database of |                      |         |         |      |         |         |      |   |  |
| 29 | Zhou <sup>106</sup>              | 2017 | Systematic Reviews   | Full                 | Full    | No      |      |         | F       | F, T | F |  |
| 30 |                                  |      | Cochrane Database of |                      |         |         |      |         |         |      |   |  |
| 31 | Zonneveld <sup>107</sup>         | 2018 | Systematic Reviews   | Partial <sup>l</sup> | No      | No      |      | F       |         |      |   |  |
| 32 | <b>General Medicine (n = 33)</b> |      |                      |                      |         |         |      |         |         |      |   |  |
| 33 | López-López <sup>108</sup>       | 2017 | BMJ                  | Full                 | No      | No      |      |         | F       |      | F |  |
| 34 |                                  |      | BMJ Open             |                      |         |         |      |         |         |      |   |  |
| 35 | Wang <sup>109</sup>              | 2018 | BMJ Open             | No                   | No      | No      |      |         |         |      |   |  |
| 36 |                                  |      | Lancet               |                      |         |         |      |         | F       |      | F |  |
| 37 | Cipriani <sup>110</sup>          | 2018 | Lancet               | Full <sup>k</sup>    | No      | No      |      |         |         |      |   |  |
| 38 |                                  |      | Medicine             |                      |         |         |      |         |         |      |   |  |
| 39 | Chen <sup>111</sup>              | 2018 | Medicine             | No                   | No      | No      |      |         |         |      |   |  |
| 40 |                                  |      | Medicine             |                      |         |         |      |         |         |      |   |  |
| 41 | Ding <sup>112</sup>              | 2018 | Medicine             | No                   | No      | No      |      |         |         |      |   |  |
| 42 |                                  |      | Medicine             |                      |         |         |      |         |         |      |   |  |
| 43 | Guo <sup>113</sup>               | 2018 | Medicine             | No                   | No      | No      |      |         |         |      |   |  |
| 44 |                                  |      | Medicine             |                      |         |         |      |         |         |      |   |  |
| 45 | Han <sup>114</sup>               | 2018 | Medicine             | No                   | No      | No      |      |         |         |      |   |  |
| 46 |                                  |      | Medicine             |                      |         |         |      |         |         |      |   |  |
| 47 | Hu <sup>115</sup>                | 2018 | Medicine             | No                   | No      | No      |      |         |         |      |   |  |
| 48 |                                  |      | Medicine             |                      |         |         |      |         |         |      |   |  |
| 49 | Huang <sup>116</sup>             | 2018 | Medicine             | Full                 | Partial | No      | F, T |         |         |      |   |  |
| 50 |                                  |      | Medicine             |                      |         |         |      |         |         |      |   |  |
| 51 | Jiang <sup>117</sup>             | 2018 | Medicine             | No                   | No      | No      |      |         |         |      |   |  |
| 52 |                                  |      | Medicine             |                      |         |         |      |         |         |      |   |  |
| 53 | Jiang <sup>118</sup>             | 2018 | Medicine             | No                   | No      | No      |      |         |         |      |   |  |
| 54 |                                  |      | Medicine             |                      |         |         |      |         |         |      |   |  |
| 55 | Khan <sup>119</sup>              | 2018 | Medicine             | No                   | No      | No      |      |         |         |      |   |  |
| 56 |                                  |      | Medicine             |                      |         |         |      |         |         |      |   |  |
| 57 | Liang <sup>120</sup>             | 2017 | Medicine             | No                   | No      | No      |      |         |         |      |   |  |
| 58 |                                  |      | Medicine             |                      |         |         |      |         |         |      |   |  |
| 59 | Liu <sup>121</sup>               | 2018 | Medicine             | Partial <sup>l</sup> | No      | No      |      |         | F       |      |   |  |
| 60 |                                  |      | Medicine             |                      |         |         |      |         |         |      |   |  |
| 61 | Lor <sup>122</sup>               | 2017 | Medicine             | No                   | No      | No      |      |         |         |      |   |  |
| 62 |                                  |      | Medicine             |                      |         |         |      |         |         |      |   |  |
| 63 | Wang <sup>123</sup>              | 2017 | Medicine             | No                   | No      | No      |      |         |         |      |   |  |
| 64 |                                  |      | Medicine             |                      |         |         |      |         |         |      |   |  |
| 65 | Wang <sup>124</sup>              | 2018 | Medicine             | No                   | No      | No      |      |         |         |      |   |  |
| 66 |                                  |      | Medicine             |                      |         |         |      |         |         |      |   |  |
| 67 | Wang <sup>125</sup>              | 2018 | Medicine             | No                   | No      | No      |      |         |         |      |   |  |
| 68 |                                  |      | Medicine             |                      |         |         |      |         |         |      |   |  |
| 69 | Wei <sup>126</sup>               | 2017 | Medicine             | No                   | No      | No      |      |         |         |      |   |  |

1  
2  
3  
4  
5  
6  
7  
8  
9  
10  
11  
12  
13  
14  
15  
16  
17  
18  
19  
20  
21  
22  
23  
24  
25  
26  
27  
28  
29  
30  
31  
32  
33  
34  
35  
36  
37  
38  
39  
40  
41  
42  
43  
44  
45  
46  
47

|                                     |      |                                                                     |                      |    |    |      |   |
|-------------------------------------|------|---------------------------------------------------------------------|----------------------|----|----|------|---|
| Woo <sup>127</sup>                  | 2018 | Medicine                                                            | No                   | No | No |      |   |
| Xia <sup>128</sup>                  | 2018 | Medicine                                                            | No                   | No | No |      |   |
| Yang <sup>129</sup>                 | 2017 | Medicine                                                            | No                   | No | No |      |   |
| Ye <sup>130</sup>                   | 2017 | Medicine                                                            | No                   | No | No |      |   |
| Yu <sup>131</sup>                   | 2018 | Medicine                                                            | No                   | No | No |      |   |
| Yuan <sup>132</sup>                 | 2018 | Medicine                                                            | No                   | No | No |      |   |
| Zhang <sup>133</sup>                | 2018 | Medicine                                                            | No                   | No | No |      |   |
| Zhang <sup>134</sup>                | 2018 | Medicine                                                            | No                   | No | No |      |   |
| Zhao <sup>135</sup>                 | 2018 | Medicine                                                            | No                   | No | No |      |   |
| Zhao <sup>136</sup>                 | 2018 | Medicine                                                            | No                   | No | No |      |   |
| Zhou <sup>137</sup>                 | 2018 | Medicine                                                            | No                   | No | No |      |   |
| Zhu <sup>138</sup>                  | 2018 | Medicine                                                            | No                   | No | No |      |   |
| Zhou <sup>139</sup>                 | 2018 | Postgraduate Medicine<br>Revista da Associação<br>Médica Brasileira | No                   | No | No |      |   |
| Zhang <sup>140</sup>                | 2018 | Full                                                                | Full <sup>m</sup>    | No |    | F, T |   |
| <b>Specialty medicine (n = 100)</b> |      |                                                                     |                      |    |    |      |   |
| Li <sup>141</sup>                   | 2018 | Acta Ophthalmologica<br>American Heart<br>Journal                   | Full <sup>n</sup>    | No | No | F    | F |
| Tarantini <sup>142</sup>            | 2018 | American Journal of<br>Cardiovascular Drugs                         | No                   | No | No |      |   |
| Wang <sup>143</sup>                 | 2018 | Anaesthesia and<br>Intensive Care                                   | No                   | No | No |      |   |
| Aman <sup>144</sup>                 | 2018 | Autoimmunity<br>Reviews                                             | No                   | No | No |      |   |
| Li <sup>145</sup>                   | 2018 | Biomed Research<br>International                                    | No                   | No | No |      |   |
| Wang <sup>146</sup>                 | 2018 | BMC Cancer                                                          | No                   | No | No |      |   |
| Veetil <sup>147</sup>               | 2017 | BMC Cardiovascular<br>Disorders                                     | Full                 | No | No |      | F |
| Bredemeier <sup>148</sup>           | 2018 | BMC<br>Gastroenterology<br>BMC Infectious<br>Diseases               | No                   | No | No |      |   |
| Lyu <sup>149</sup>                  | 2018 | BMC Musculoskeletal<br>Disorders                                    | No                   | No | No |      |   |
| Xing <sup>150</sup>                 | 2017 | BMC Neurology                                                       | No                   | No | No |      |   |
| Kuo <sup>151</sup>                  | 2018 | BMC Ophthalmology                                                   | No                   | No | No |      |   |
| Beez <sup>152</sup>                 | 2017 | BMC Pharmacology &<br>Toxicology                                    | No                   | No | No |      |   |
| Zeng <sup>153</sup>                 | 2017 | BMC Psychiatry                                                      | No                   | No | No |      |   |
| Bundhun <sup>154</sup>              | 2017 | BMC Pulmonary<br>Medicine                                           | No                   | No | No |      |   |
| Zhang <sup>155</sup>                | 2017 | BMC Pulmonary<br>Medicine                                           | No                   | No | No |      |   |
| Zhang <sup>156</sup>                | 2017 | Medicine                                                            | Full                 | No | No |      |   |
| Zhang <sup>157</sup>                | 2017 | Medicine                                                            | Full                 | No | No |      |   |
| Ramos-Esquivel <sup>158</sup>       | 2018 | Breast Cancer<br>British Journal of<br>Sports Medicine              | No                   | No | No |      |   |
| Zeng <sup>159</sup>                 | 2018 | Sports Medicine                                                     | Partial <sup>o</sup> | No | No | F    | F |

|    |                                      |      |                          |                      |    |    |   |   |
|----|--------------------------------------|------|--------------------------|----------------------|----|----|---|---|
| 1  |                                      |      |                          |                      |    |    |   |   |
| 2  |                                      |      |                          |                      |    |    |   |   |
| 3  |                                      |      | Cellular Physiology      |                      |    |    |   |   |
| 4  | Shui <sup>160</sup>                  | 2018 | and Biochemistry         | No                   | No | No |   |   |
| 5  | Rodrigo <sup>161</sup>               | 2018 | Clinical Microbiology    | Partial              | No | No |   | F |
| 6  |                                      |      | and Infection            |                      |    |    |   |   |
| 7  | Wang <sup>162</sup>                  | 2018 | Clinical                 | No                   | No | No |   |   |
| 8  |                                      |      | Rheumatology             |                      |    |    |   |   |
| 9  | Hong <sup>163</sup>                  | 2018 | Critical Reviews in      |                      |    |    |   |   |
| 10 | de Carvalho <sup>164</sup>           | 2018 | Oncology /               |                      |    |    |   |   |
| 11 |                                      |      | Hematology               | No                   | No | No |   |   |
| 12 | Jaafar <sup>165</sup>                | 2018 | Diabetes Care            | No                   | No | No |   |   |
| 13 | Liu <sup>166</sup>                   | 2018 | Digestive Diseases and   |                      |    |    |   |   |
| 14 |                                      |      | Sciences                 | No                   | No | No |   |   |
| 15 | Liu <sup>167</sup>                   | 2018 | Drug Delivery            | No                   | No | No |   |   |
| 16 |                                      |      | Drug Design,             |                      |    |    |   |   |
| 17 | Sun <sup>168</sup>                   | 2017 | Development and          |                      |    |    |   |   |
| 18 | Paraschakis <sup>169</sup>           | 2017 | Therapy                  | No                   | No | No |   |   |
| 19 |                                      |      | Drug Design,             |                      |    |    |   |   |
| 20 | D'Souza <sup>170</sup>               | 2018 | Development and          |                      |    |    |   |   |
| 21 |                                      |      | Therapy                  | No                   | No | No |   |   |
| 22 | Mei <sup>171</sup>                   | 2016 | East Asian Archives of   |                      |    |    |   |   |
| 23 | Verberkt <sup>172</sup>              | 2017 | Psychiatry               | No                   | No | No |   |   |
| 24 |                                      |      | Emergency Medicine       |                      |    |    |   |   |
| 25 | Sridharan <sup>173</sup>             | 2018 | Journal                  | No                   | No | No |   |   |
| 26 |                                      |      | European Journal of      |                      |    |    |   |   |
| 27 | Habibi <sup>174</sup>                | 2018 | Gynecological            |                      |    |    |   |   |
| 28 |                                      |      | Oncology                 | No                   | No | No |   |   |
| 29 | Lj <sup>175</sup>                    | 2018 | European Respiratory     |                      |    |    |   |   |
| 30 | Sangroongruangsr<br>i <sup>176</sup> | 2018 | Journal                  | No                   | No | No |   | F |
| 31 | Hickey <sup>177</sup>                | 2018 | Expert Opinion on        |                      |    |    |   |   |
| 32 | Zhao <sup>178</sup>                  | 2018 | Pharmacotherapy          | No                   | No | No |   |   |
| 33 | Khera <sup>179</sup>                 | 2018 | Expert Review of         |                      |    |    |   |   |
| 34 |                                      |      | Clinical Pharmacology    | No                   | No | No |   |   |
| 35 | Lj <sup>180</sup>                    | 2018 | Expert Review of         |                      |    |    |   |   |
| 36 | Zhuge <sup>181</sup>                 | 2018 | Clinical Pharmacology    | No                   | No | No |   |   |
| 37 | Kim <sup>182</sup>                   | 2017 | Expert Review of         |                      |    |    |   |   |
| 38 |                                      |      | Clinical Pharmacology    | No                   | No | No |   |   |
| 39 | Garg <sup>183</sup>                  | 2018 | Foot and Ankle           | No                   | No | No |   |   |
| 40 | Rosanova <sup>184</sup>              | 2017 | Surgery                  | No                   | No | No |   |   |
| 41 | Yu <sup>185</sup>                    | 2018 | Gastric Cancer           | Partial <sup>P</sup> | No | No | F | F |
| 42 |                                      |      | Gastroenterology         |                      |    |    |   |   |
| 43 |                                      |      | Gynecologic              |                      |    |    |   |   |
| 44 |                                      |      | Oncology                 | No                   | No | No |   |   |
| 45 |                                      |      | Helicobacter             | No                   | No | No |   |   |
| 46 |                                      |      | Indian Journal of        |                      |    |    |   |   |
| 47 |                                      |      | Cancer                   | No                   | No | No |   |   |
|    |                                      |      | Indian Journal of        |                      |    |    |   |   |
|    |                                      |      | Gastroenterology         | No                   | No | No |   |   |
|    |                                      |      | Infectious Diseases      | No                   | No | No |   |   |
|    |                                      |      | Inflammopharmacolog<br>y | No                   | No | No |   |   |

|    |                             |      |                       |                      |    |    |     |
|----|-----------------------------|------|-----------------------|----------------------|----|----|-----|
| 1  |                             |      |                       |                      |    |    |     |
| 2  |                             |      |                       |                      |    |    |     |
| 3  |                             |      | International         |                      |    |    |     |
| 4  | Kakkos <sup>186</sup>       | 2018 | Angiology             | No                   | No | No |     |
| 5  | Ou <sup>187</sup>           | 2018 | International         |                      |    |    | F   |
| 6  |                             |      | Immunopharmacology    | Full                 | No | No |     |
| 7  | Yin <sup>188</sup>          | 2018 | International         | No                   | No | No |     |
| 8  |                             |      | Immunopharmacology    |                      |    |    |     |
| 9  | Zhu <sup>189</sup>          | 2018 | International Journal | No                   | No | No |     |
| 10 |                             |      | of Clinical Oncology  |                      |    |    |     |
| 11 | Liu <sup>190</sup>          | 2018 | International Journal | No                   | No | No |     |
| 12 |                             |      | of Neuroscience       |                      |    |    |     |
| 13 | Coccolini <sup>191</sup>    | 2018 | International Journal | No                   | No | No |     |
| 14 |                             |      | of Surgery            |                      |    |    |     |
| 15 | Fan <sup>192</sup>          | 2018 | International Journal | No                   | No | No |     |
| 16 |                             |      | of Surgery            |                      |    |    |     |
| 17 | Li <sup>193</sup>           | 2018 | International Journal | No                   | No | No |     |
| 18 |                             |      | of Surgery            |                      |    |    |     |
| 19 | Li <sup>194</sup>           | 2018 | International Journal | No                   | No | No |     |
| 20 |                             |      | of Surgery            |                      |    |    |     |
| 21 | Liu <sup>195</sup>          | 2018 | International Journal | No                   | No | No |     |
| 22 |                             |      | of Surgery            |                      |    |    |     |
| 23 | Ran <sup>196</sup>          | 2018 | International Journal | No <sup>a</sup>      | No | No |     |
| 24 |                             |      | of Surgery            |                      |    |    |     |
| 25 | Zhao <sup>197</sup>         | 2018 | International Journal | No                   | No | No |     |
| 26 |                             |      | of Surgery            |                      |    |    |     |
| 27 | Zhu <sup>198</sup>          | 2018 | International Journal | No                   | No | No |     |
| 28 |                             |      | of Surgery            |                      |    |    |     |
| 29 | Wagner <sup>199</sup>       | 2018 | Journal of Affective  | Partial              | No | No | F   |
| 30 |                             |      | Disorders             |                      |    |    |     |
| 31 | Hickman <sup>200</sup>      | 2018 | Journal of Assisted   | No                   | No | No |     |
| 32 |                             |      | Reproduction and      |                      |    |    |     |
| 33 |                             |      | Genetics              |                      |    |    |     |
| 34 | Luo <sup>201</sup>          | 2018 | Journal of Cancer     | No                   | No | No |     |
| 35 |                             |      | Research and Clinical |                      |    |    |     |
| 36 |                             |      | Oncology              |                      |    |    |     |
| 37 | Wang <sup>202</sup>         | 2018 | Journal of Cancer     | Partial <sup>f</sup> | No | No | F F |
| 38 |                             |      | Research and          |                      |    |    |     |
| 39 | Wang <sup>203</sup>         | 2018 | Therapeutics          | No                   | No | No |     |
| 40 |                             |      | Journal of Cardiac    |                      |    |    |     |
| 41 | Aboul-Hassan <sup>204</sup> | 2017 | Surgery               | No                   | No | No |     |
| 42 |                             |      | Journal of            |                      |    |    |     |
| 43 |                             |      | Cardiovascular        |                      |    |    |     |
| 44 | Wang <sup>205</sup>         | 2018 | Surgery               | No                   | No | No |     |
| 45 |                             |      | Journal of Clinical   |                      |    |    | F   |
| 46 |                             |      | Endocrinology and     |                      |    |    |     |
| 47 | Barrionuevo <sup>206</sup>  | 2018 | Metabolism            | Full                 | No | No | F   |

1  
2  
3  
4  
5  
6  
7  
8  
9  
10  
11  
12  
13  
14  
15  
16  
17  
18  
19  
20  
21  
22  
23  
24  
25  
26  
27  
28  
29  
30  
31  
32  
33  
34  
35  
36  
37  
38  
39  
40  
41  
42  
43  
44  
45  
46  
47

|                            |      |                                                                |                   |    |    |   |
|----------------------------|------|----------------------------------------------------------------|-------------------|----|----|---|
| Cui <sup>207</sup>         | 2018 | Journal of Clinical Pharmacy and Therapeutics                  | Full <sup>s</sup> | No | No | F |
| Sawyer <sup>208</sup>      | 2018 | Journal of Dermatological Treatment                            | No                | No | No |   |
| Markey <sup>209</sup>      | 2018 | Journal of Emergency Medicine                                  | No                | No | No |   |
| Szabó <sup>210</sup>       | 2017 | Journal of Gastrointestinal and Liver Diseases                 | No                | No | No |   |
| Su <sup>211</sup>          | 2018 | Journal of Immunology Research                                 | No                | No | No |   |
| Chen <sup>212</sup>        | 2018 | Journal of Interventional Cardiac Electrophysiology            | No                | No | No |   |
| Chen <sup>213</sup>        | 2017 | Journal of Orthopaedic Surgery and Research                    | No                | No | No |   |
| Li <sup>214</sup>          | 2018 | Journal of Orthopaedic Surgery and Research                    | No                | No | No |   |
| Luo <sup>215</sup>         | 2018 | Journal of Orthopaedic Surgery and Research                    | No                | No | No |   |
| Ma <sup>216</sup>          | 2018 | Journal of Orthopaedic Surgery and Research                    | No                | No | No |   |
| He <sup>217</sup>          | 2018 | Journal of Psychiatric Research                                | Full              | No | No | F |
| Wang <sup>218</sup>        | 2018 | Journal of Stroke & Cerebrovascular Diseases                   | No                | No | No |   |
| Dhana <sup>219</sup>       | 2018 | Journal of the American Academy of Dermatology                 | No                | No | No |   |
| Karatasakis <sup>220</sup> | 2017 | Journal of the American Heart Association                      | No                | No | No |   |
| Kuo <sup>221</sup>         | 2018 | Journal of the European Academy of Dermatology and Venereology | Full              | No | No |   |
| Liu <sup>222</sup>         | 2016 | Journal of Traditional Chinese Medicine                        | No                | No | No |   |
| Zheng <sup>223</sup>       | 2017 | Journal of Zhejiang University-SCIENCE B                       | No                | No | No |   |
| Fregonese <sup>224</sup>   | 2018 | Lancet Respiratory Medicine                                    | No                | No | No |   |
| Bornstein <sup>225</sup>   | 2018 | Neurological Sciences                                          | No                | No | No |   |
| Chen <sup>226</sup>        | 2018 | Ophthalmic Research                                            | No                | No | No |   |
| Han <sup>227</sup>         | 2017 | Pain Physician                                                 | No                | No | No |   |
| Peng <sup>228</sup>        | 2017 | Pain Physician                                                 | No                | No | No |   |



|    |                            |      |                                  |      |    |         |   |
|----|----------------------------|------|----------------------------------|------|----|---------|---|
| 3  | Feng <sup>229</sup>        | 2016 | Pharmazie                        | No   | No | No      |   |
| 4  | Xu <sup>230</sup>          | 2016 | Pharmazie                        | No   | No | No      |   |
| 5  | Palmeirim <sup>231</sup>   | 2018 | PLOS Neglected Tropical Diseases | No   | No | No      |   |
| 6  |                            |      | Psychotherapy and                |      |    |         |   |
| 7  | Furukawa <sup>232</sup>    | 2018 | Psychosomatics                   | No   | No | No      |   |
| 8  | Liu <sup>233</sup>         | 2018 | Renal Failure                    | No   | No | No      |   |
| 9  | Miravittles <sup>234</sup> | 2017 | Respiratory Research             | Full | No | No      | F |
| 10 | Wang <sup>235</sup>        | 2017 | Respiratory Research             | No   | No | No      |   |
| 11 |                            |      | Rheumatology                     |      |    |         |   |
| 12 | Kawalec <sup>236</sup>     | 2018 | International                    | No   | No | No      |   |
| 13 | Malhotra <sup>237</sup>    | 2018 | Stroke                           | No   | No | No      |   |
| 14 |                            |      | Surgical Laparoscopy             |      |    |         |   |
| 15 |                            |      | Endoscopy & Percutaneous         |      |    |         |   |
| 16 | Zhang <sup>238</sup>       | 2018 | Techniques                       | No   | No | No      |   |
| 17 | Yamashita <sup>239</sup>   | 2018 | Thrombosis Research              | No   | No | Partial | E |
| 18 | Zhang <sup>240</sup>       | 2018 | Vaccine                          | No   | No | No      |   |

**Other (n = 10)**

|    |                            |      |                 |         |    |    |   |
|----|----------------------------|------|-----------------|---------|----|----|---|
| 19 | Chen <sup>241</sup>        | 2018 | Medical Science |         |    |    |   |
| 20 | Arteagoitia <sup>242</sup> | 2018 | Monitor         | No      | No | No |   |
| 21 | Feng <sup>243</sup>        | 2018 | PLOS ONE        | No      | No | No |   |
| 22 | Kawakami <sup>244</sup>    | 2018 | PLOS ONE        | No      | No | No |   |
| 23 | Li <sup>245</sup>          | 2018 | PLOS ONE        | No      | No | No |   |
| 24 | Lin <sup>246</sup>         | 2017 | PLOS ONE        | No      | No | No |   |
| 25 | Ling <sup>247</sup>        | 2018 | PLOS ONE        | No      | No | No |   |
| 26 | Rohner <sup>248</sup>      | 2017 | PLOS ONE        | No      | No | No |   |
| 27 | Sethi <sup>249</sup>       | 2018 | PLOS ONE        | Partial | No | No | F |
| 28 | Wolf <sup>250</sup>        | 2018 | PLOS ONE        | No      | No | No |   |

<sup>a</sup>Funding sources categorized as government funded, industry funded, or mixed for most trials. Specific details about funding were reported for 2 trials and details on author ties and employment were reported for a single trial; <sup>b</sup>Authors reported extracting funding sources from included RCTs but funding sources are only reported for a single study; <sup>c</sup>Reported funding sources for all included studies except for one; <sup>d</sup>Reported author financial ties for all included studies except for 2; <sup>e</sup>Non-industry author employment reported for some included RCTs; <sup>f</sup>Funding sources and author ties reported for all included RCTs except one that was a conference abstract; <sup>g</sup>Funding sources only reported for a single RCT; <sup>h</sup>Authors reported whether or not included RCTs had declared COI (yes, no) and, if yes, indicated the page of the original study the declaration could be found on. This was coded as partially reporting because the nature of these COI was not reported within the meta-analysis publication itself and it was unclear whether these were financial ties and whether they were with industry; <sup>i</sup>Non-industry author financial ties reported for some included RCTs; <sup>j</sup>A single RCT was reported as 'industry sponsored' with no specifics about the sponsor; <sup>k</sup>Authors coded studies as sponsored by industry or not, and any of author industry affiliation, industry funding, or data obtained from pharmaceutical company qualified an RCT as 'sponsored'; <sup>l</sup>Authors report that 'some trials had a high risk of reporting bias because they were sponsored by pharmaceutical companies' but do not specify which or even how many trials; <sup>m</sup>Authors reported that all included RCTs had authors with financial ties to industry but provided no further information; <sup>n</sup>Reported whether each included RCT was industry funded (yes or no) but provided no further information; <sup>o</sup>For some analyses the authors reported how many included RCTs were non-commercially funded and present results including only non-commercially funded trials, but do not provide further information on which trials were commercially funded; <sup>p</sup>Authors state 14 trials were industry-sponsored and reference figure 1 in the supplementary material where 14 studies were marked as high risk for other bias, but it is not explicitly specified what was considered as 'other bias'; <sup>q</sup>Authors considered RCT funding sources within 'other bias'. In their risk of bias assessment but did not report any specific information; <sup>r</sup>Authors report that most studies were funded by the pharmaceutical industry and refer readers to figure 2 (risk of bias figure), but the figure does not give any information about which RCTs; <sup>s</sup>Included RCTs were coded as having company funding (Yes/No).

## References for eTable1 and eTable2

1. Abdel-Rahman O, Elsayed Z, Elhalawani H. Gemcitabine-based chemotherapy for advanced biliary tract carcinomas. *Cochrane Database of Syst Rev.* 2018;4.
2. Adams SP, Sekhon SS, Tsang M, Wright JM. Fluvastatin for lowering lipids. *Cochrane Database of Syst Rev.* 2018;3.
3. Agabio R, Trogu E, Pani PP. Antidepressants for the treatment of people with co-occurring depression and alcohol dependence. *Cochrane Database of Syst Rev.* 2018;4.
4. Al-Shahi Salman, Law ZK, Bath PM, Steiner T, Sprigg N. Haemostatic therapies for acute spontaneous intracerebral haemorrhage. *Cochrane Database of Syst Rev.* 2018;4.
5. Alabed S, Latifeh Y, Mohammad HA, Bergman H. Gamma-aminobutyric acid agonists for antipsychotic-induced tardive dyskinesia. *Cochrane Database of Syst Rev.* 2018;4.
6. Allegretti AS, Israelsen M, Krag A, Jovani M, Goldin AH, Schulman AR, et al. Terlipressin versus placebo or no intervention for people with cirrhosis and hepatorenal syndrome. *Cochrane Database of Syst Rev.* 2017;6.
7. Arechabala MC, Catoni MI, Claro JC, Rojas NP, Rubio ME, Calvo MA, et al. Antimicrobial lock solutions for preventing catheter-related infections in haemodialysis. *Cochrane Database of Syst Rev.* 2018;4.
8. Baandrup L, Ebdrup BH, JØ R, Lindschou J, Gluud C, Glenthøj BY. Pharmacological interventions for benzodiazepine discontinuation in chronic benzodiazepine users. *Cochrane Database of Syst Rev.* 2018;3.
9. Bala MM, Paszek E, Lesniak W, Wloch-Kopec D, Jasinska K, Undas A. Antiplatelet and anticoagulant agents for primary prevention of thrombosis in individuals with antiphospholipid antibodies. *Cochrane Database of Syst Rev.* 2018;7.
10. Barbato A, Avanzo BD, Parabiaghi A. Couple therapy for depression. *Cochrane Database of Syst Rev.* 2018;6.
11. Bergman H, Bhoopathi PS, Soares-Weiser K. Benzodiazepines for antipsychotic-induced tardive dyskinesia. *Cochrane Database of Syst Rev.* 2018;1.
12. Bighelli I, Castellazzi M, Cipriani A, Girlanda F, Guaiana G, Koesters M, et al. Antidepressants versus placebo for panic disorder in adults. *Cochrane Database of Syst Rev.* 2018;4.

- 1  
2  
3 13. Birks JS, Harvey RJ. Donepezil for dementia due to Alzheimer's disease. *Cochrane*  
4 *Database of Syst Rev.* 2018;6.  
5  
6
- 7 14. Boyapati RK, Torres J, Palmela C, Parker CE, Silverberg OM, Upadhyaya SD, et al.  
8 Withdrawal of immunosuppressant or biologic therapy for patients with quiescent  
9 Crohn's disease. *Cochrane Database of Syst Rev.* 2018;5.  
10  
11
- 12 15. Brown J, Crawford TJ, Datta S, Prentice A. Oral contraceptives for pain associated with  
13 endometriosis. *Cochrane Database of Syst Rev.* 2018;5.  
14  
15
- 16 16. Bruins Slot KMH, Berge E. Factor Xa inhibitors versus vitamin K antagonists for  
17 preventing cerebral or systemic embolism in patients with atrial fibrillation. *Cochrane*  
18 *Database of Syst Rev.* 2018;3.  
19  
20
- 21 17. Bryan EJ, Purcell MA, Kumar A. Zuclopenthixol dihydrochloride for schizophrenia.  
22 *Cochrane Database of Syst Rev.* 2017;11.  
23  
24
- 25 18. Bryant-Smith AC, Lethaby A, Farquhar C, Hickey M. Antifibrinolytics for heavy  
26 menstrual bleeding. *Cochrane Database of Syst Rev.* 2018;4.  
27  
28
- 29 19. Burry L, Mehta S, Perreault MM, Luxenberg JS, Siddiqi N, Hutton B, et al.  
30 Antipsychotics for treatment of delirium in hospitalised non-ICU patients. *Cochrane*  
31 *Database of Syst Rev.* 2018;6.  
32  
33
- 34 20. Campschroer T, Zhu X, Vernooij RW, Lock MT. Alpha-blockers as medical expulsive  
35 therapy for ureteral stones. *Cochrane Database of Syst Rev.* 2018;4.  
36  
37
- 38 21. Candy B, Jones L, Vickerstaff V, Larkin PJ, Stone P. Mu-opioid antagonists for opioid-  
39 induced bowel dysfunction in people with cancer and people receiving palliative care.  
40 *Cochrane Database of Syst Rev.* 2018;6.  
41  
42
- 43 22. Chiew AL, Gluud C, Brok J, Buckley NA. Interventions for paracetamol  
44 (acetaminophen) overdose. *Cochrane Database of Syst Rev.* 2018;2.  
45  
46
- 47 23. Das RR, Singh M, Naik SS. Vitamin D as an adjunct to antibiotics for the treatment of  
48 acute childhood pneumonia. *Cochrane Database of Syst Rev.* 2018;7.  
49  
50
- 51 24. Demicheli V, Jefferson T, Ferroni E, Rivetti A, Pietrantonj CD. Vaccines for preventing  
52 influenza in healthy adults. *Cochrane Database of Syst Rev.* 2018;2.  
53  
54
- 55 25. Demicheli V, Jefferson T, Pietrantonj CD, Ferroni E, Thorning S, Thomas RE, et al.  
56 Vaccines for preventing influenza in the elderly. *Cochrane Database of Syst Rev.* 2018;2.  
57  
58  
59  
60

- 1
  - 2
  - 3
  - 4
  - 5
  - 6
  - 7
  - 8
  - 9
  - 10
  - 11
  - 12
  - 13
  - 14
  - 15
  - 16
  - 17
  - 18
  - 19
  - 20
  - 21
  - 22
  - 23
  - 24
  - 25
  - 26
  - 27
  - 28
  - 29
  - 30
  - 31
  - 32
  - 33
  - 34
  - 35
  - 36
  - 37
  - 38
  - 39
  - 40
  - 41
  - 42
  - 43
  - 44
  - 45
  - 46
  - 47
  - 48
  - 49
  - 50
  - 51
  - 52
  - 53
  - 54
  - 55
  - 56
  - 57
  - 58
  - 59
  - 60
26. Di Nisio M, Wichers IM, Middeldorp S. Treatment for superficial thrombophlebitis of the leg. *Cochrane Database of Syst Rev.* 2018;2.
27. El-Sayeh HG, Rathbone J, Soares-Weiser K, Bergman H. Non-antipsychotic catecholaminergic drugs for antipsychotic-induced tardive dyskinesia. *Cochrane Database of Syst Rev.* 2018;1.
28. Engelen ET, Schutgens RE, Mauser-Bunschoten EP, Es RJv, Galen KPv. Antifibrinolytic therapy for preventing oral bleeding in people on anticoagulants undergoing minor oral surgery or dental extractions. *Cochrane Database of Syst Rev.* 2018;7.
29. Eshun-Wilson I, Siegfried N, Akena DH, Stein DJ, Obuku EA, Joska JA. Antidepressants for depression in adults with HIV infection. *Cochrane Database of Syst Rev.* 2018;1.
30. Essali A, Soares-Weiser K, Bergman H, Adams CE. Calcium channel blockers for antipsychotic-induced tardive dyskinesia. *Cochrane Database of Syst Rev.* 2018;3.
31. Everitt H, Baldwin DS, Stuart B, Lipinska G, Mayers A, Malizia AL, et al. Antidepressants for insomnia in adults. *Cochrane Database of Syst Rev.* 2018;5.
32. Fanshawe TR, Halliwell W, Lindson N, Aveyard P, Livingstone-Banks J, Hartmann-Boyce J. Tobacco cessation interventions for young people. *Cochrane Database of Syst Rev.* 2017;11.
33. Franik S, Eltrop SM, Kremer JA, Kiesel L, Farquhar C. Aromatase inhibitors (letrozole) for subfertile women with polycystic ovary syndrome. *Cochrane Database of Syst Rev.* 2018;5.
34. González R, Pons-Duran C, Piqueras M, Aponte JJ, Kuile FOT, Menéndez C. Mefloquine for preventing malaria in pregnant women. *Cochrane Database of Syst Rev.* 2018;3.
35. Grabosch SM, Shariff OM, Helm CW. Non-steroidal anti-inflammatory agents to induce regression and prevent the progression of cervical intraepithelial neoplasia. *Cochrane Database of Syst Rev.* 2018;2.
36. Graves PM, Choi L, Gelband H, Garner P. Primaquine or other 8-aminoquinolines for reducing Plasmodium falciparum transmission. *Cochrane Database of Syst Rev.* 2018;2.
37. Haas DM, Morgan S, Contreras K, Enders S. Vaginal preparation with antiseptic solution before cesarean section for preventing postoperative infections. *Cochrane Database of Syst Rev.* 2018;7.

- 1  
2  
3  
4  
5  
6  
7  
8  
9  
10  
11  
12  
13  
14  
15  
16  
17  
18  
19  
20  
21  
22  
23  
24  
25  
26  
27  
28  
29  
30  
31  
32  
33  
34  
35  
36  
37  
38  
39  
40  
41  
42  
43  
44  
45  
46  
47  
48  
49  
50  
51  
52  
53  
54  
55  
56  
57  
58  
59  
60
38. Hakoum MB, Kahale LA, Tsoiakian IG, Matar CF, Yosucio VE, Terrenato I, et al. Anticoagulation for the initial treatment of venous thromboembolism in people with cancer. *Cochrane Database of Syst Rev.* 2018;1.
  39. Heras-Mosteiro J, Monge-Maillo B, Pinart M, Pereira PL, Reveiz L, Garcia-Carrasco E, et al. Interventions for Old World cutaneous leishmaniasis. *Cochrane Database of Syst Rev.* 2017;12.
  40. Janmaat VT, Steyerberg EW, Gaast Avd, Mathijssen RH, Bruno MJ, Peppelenbosch MP, et al. Palliative chemotherapy and targeted therapies for esophageal and gastroesophageal junction cancer. *Cochrane Database of Syst Rev.* 2017;11.
  41. Jefferson T, Rivetti A, Pietrantonj CD, Demicheli V. Vaccines for preventing influenza in healthy children. *Cochrane Database of Syst Rev.* 2018;2.
  42. Jung JH, Kim J, MacDonald R, Reddy B, Kim MH, Dahm P. Silodosin for the treatment of lower urinary tract symptoms in men with benign prostatic hyperplasia. *Cochrane Database of Syst Rev.* 2017;11.
  43. Kaempfen S, Neumann RP, Jost K, Schulzke SM. Beta-blockers for prevention and treatment of retinopathy of prematurity in preterm infants. *Cochrane Database of Syst Rev.* 2018;3.
  44. Kahale LA, Hakoum MB, Tsoiakian IG, Matar CF, Barba M, Yosucio VED, et al. Oral anticoagulation in people with cancer who have no therapeutic or prophylactic indication for anticoagulation. *Cochrane Database of Syst Rev.* 2017;12.
  45. Kahale LA, Tsoiakian IG, Hakoum MB, Matar CF, Barba M, Yosucio VE, et al. Anticoagulation for people with cancer and central venous catheters. *Cochrane Database of Syst Rev.* 2018;6.
  46. Kahale LA, Hakoum MB, Tsoiakian IG, Matar CF, Terrenato I, Sperati F, et al. Anticoagulation for the long-term treatment of venous thromboembolism in people with cancer. *Cochrane Database of Syst Rev.* 2018;6.
  47. Kapur N, Petsky HL, Bell S, Kolbe J, Chang AB. Inhaled corticosteroids for bronchiectasis. *Cochrane Database of Syst Rev.* 2018;5.
  48. Kelly C, Chalmers JD, Crossingham I, Relph N, Felix LM, Evans DJ, et al. Macrolide antibiotics for bronchiectasis. *Cochrane Database of Syst Rev.* 2018;3.

- 1  
2  
3 49. Knightly R, Milan SJ, Hughes R, Knopp-Sihota JA, Rowe BH, Normansell R, et al.  
4  
5 Inhaled magnesium sulfate in the treatment of acute asthma. *Cochrane Database of Syst*  
6  
7 *Rev.* 2017;11.
- 8  
9 50. Kopsaftis Z, Wood-Baker R, Poole P. Influenza vaccine for chronic obstructive  
10  
11 pulmonary disease (COPD). *Cochrane Database of Syst Rev.* 2018;6.
- 12  
13 51. Lawrie TA, Green JT, Beresford M, Wedlake L, Burden S, Davidson SE, et al.  
14  
15 Interventions to reduce acute and late adverse gastrointestinal effects of pelvic  
16  
17 radiotherapy for primary pelvic cancers. *Cochrane Database of Syst Rev.* 2018;1.
- 18  
19 52. Leathersich SJ, Vogel JP, Tran TS, Hofmeyr GJ. Acute tocolysis for uterine tachysystole  
20  
21 or suspected fetal distress. *Cochrane Database of Syst Rev.* 2018;7.
- 22  
23 53. Lethaby A, Puscasiu L, Vollenhoven B. Preoperative medical therapy before surgery for  
24  
25 uterine fibroids. *Cochrane Database of Syst Rev.* 2017;11.
- 26  
27 54. López-Briz E, Garcia VR, Cabello JB, Bort-Martí S, Sanchis RC, Burls A. Heparin  
28  
29 versus 0.9% sodium chloride locking for prevention of occlusion in central venous  
30  
31 catheters in adults. *Cochrane Database of Syst Rev.* 2018;7.
- 32  
33 55. Marchant JM, Petsky HL, Morris PS, Chang AB. Antibiotics for prolonged wet cough in  
34  
35 children. *Cochrane Database of Syst Rev.* 2018;7.
- 36  
37 56. Matar HE, Almerie MQ, Sampson SJ. Fluphenazine (oral) versus placebo for  
38  
39 schizophrenia. *Cochrane Database of Syst Rev.* 2018;6.
- 40  
41 57. Matar CF, Kahale LA, Hakoum MB, Tsolakian IG, Etxeandia-Ikobaltzeta I, Yosuíco VE,  
42  
43 et al. Anticoagulation for perioperative thromboprophylaxis in people with cancer.  
44  
45 *Cochrane Database of Syst Rev.* 2018;7.
- 46  
47 58. McNicol ED, Rowe E, Cooper TE. Ketorolac for postoperative pain in children.  
48  
49 *Cochrane Database of Syst Rev.* 2018;7.
- 50  
51 59. McTague A, Martland T, Appleton R. Drug management for acute tonic-clonic  
52  
53 convulsions including convulsive status epilepticus in children. *Cochrane Database of*  
54  
55 *Syst Rev.* 2018;1.
- 56  
57 60. Mhaskar R, Kumar A, Miladinovic B, Djulbegovic B. Bisphosphonates in multiple  
58  
59 myeloma: an updated network meta-analysis. *Cochrane Database of Syst Rev.* 2017;12.
- 60  
61. Milligan R, Paul M, Richardson M, Neuberger A. Vaccines for preventing typhoid fever.  
*Cochrane Database of Syst Rev.* 2018;5.

- 1  
2  
3  
4  
5  
6  
7  
8  
9  
10  
11  
12  
13  
14  
15  
16  
17  
18  
19  
20  
21  
22  
23  
24  
25  
26  
27  
28  
29  
30  
31  
32  
33  
34  
35  
36  
37  
38  
39  
40  
41  
42  
43  
44  
45  
46  
47  
48  
49  
50  
51  
52  
53  
54  
55  
56  
57  
58  
59  
60
62. Monk AB, Harrison JE, Worthington HV, Teague A. Pharmacological interventions for pain relief during orthodontic treatment. *Cochrane Database of Syst Rev.* 2017;11.
  63. Montero N, Favà A, Rodriguez E, Barrios C, Cruzado JM, Pascual J, et al. Treatment for hepatitis C virus-associated mixed cryoglobulinaemia. *Cochrane Database of Syst Rev.* 2018;5.
  64. Mücke M, Phillips T, Radbruch L, Petzke F, Häuser W. Cannabis-based medicines for chronic neuropathic pain in adults. *Cochrane Database of Syst Rev.* 2018;3.
  65. Narula N, Dhillon A, Zhang D, Sherlock ME, Tondeur M, Zachos M. Enteral nutritional therapy for induction of remission in Crohn's disease. *Cochrane Database of Syst Rev.* 2018;4.
  66. Nevitt SJ, Sudell M, Weston J, Smith CT, Marson AG. Antiepileptic drug monotherapy for epilepsy: a network meta-analysis of individual participant data. *Cochrane Database of Syst Rev.* 2017;12.
  67. Nevitt SJ, Smith CT, Weston J, Marson AG. Lamotrigine versus carbamazepine monotherapy for epilepsy: an individual participant data review. *Cochrane Database of Syst Rev.* 2018;6.
  68. Norman G, Westby MJ, Rithalia AD, Stubbs N, Soares MO, Dumville JC. Dressings and topical agents for treating venous leg ulcers. *Cochrane Database of Syst Rev.* 2018;6.
  69. Normansell R, Sayer B, Waterson S, Dennett EJ, Forno MD, Dunleavy A. Antibiotics for exacerbations of asthma. *Cochrane Database of Syst Rev.* 2018;6.
  70. Novoa M, Baselga E, Beltran S, Giraldo L, Shahbaz A, Pardo-Hernandez H, et al. Interventions for infantile haemangiomas of the skin. *Cochrane Database of Syst Rev.* 2018;4.
  71. Ohlsson A, Aher SM. Early erythropoiesis-stimulating agents in preterm or low birth weight infants. *Cochrane Database of Syst Rev.* 2017;11.
  72. Ostinelli EG, Jajawi S, Spyridi S, Sayal K, Jayaram MB. Aripiprazole (intramuscular) for psychosis-induced aggression or agitation (rapid tranquillisation). *Cochrane Database of Syst Rev.* 2018;1.
  73. Ostinelli EG, Hussein M, Ahmed U, Rehman FU, Miramontes K, Adams CE. Risperidone for psychosis-induced aggression or agitation (rapid tranquillisation). *Cochrane Database of Syst Rev.* 2018;4.

- 1  
2  
3 74. Ostuzzi G, Matcham F, Dauchy S, Barbui C, Hotopf M. Antidepressants for the treatment  
4 of depression in people with cancer. *Cochrane Database of Syst Rev.* 2018;4.  
5  
6  
7 75. Parker CE, Nguyen TM, Segal D, MacDonald JK, Chande N. Low dose naltrexone for  
8 induction of remission in Crohn's disease. *Cochrane Database of Syst Rev.* 2018;4.  
9  
10 76. Pasquali S, Hadjinicolaou AV, Sileni VC, Rossi CR, Mocellin S. Systemic treatments for  
11 metastatic cutaneous melanoma. *Cochrane Database of Syst Rev.* 2018;2.  
12  
13 77. Pike KC, Akhbari M, Kneale D, Harris KM. Interventions for autumn exacerbations of  
14 asthma in children. *Cochrane Database of Syst Rev.* 2018;3.  
15  
16 78. Rirash F, Tingey PC, Harding SE, Maxwell LJ, Ghogomu ET, Wells GA, et al. Calcium  
17 channel blockers for primary and secondary Raynaud's phenomenon. *Cochrane Database*  
18 *of Syst Rev.* 2017;12.  
19  
20 79. Robertson L, Yeoh SE, Ramli A. Secondary prevention of recurrent venous  
21 thromboembolism after initial oral anticoagulation therapy in patients with unprovoked  
22 venous thromboembolism. *Cochrane Database of Syst Rev.* 2017;12.  
23  
24 80. Romero L, Huerfano C, Grillo-Ardila CF. Macrolides for treatment of *Haemophilus*  
25 *ducreyi* infection in sexually active adults. *Cochrane Database of Syst Rev.* 2017;12.  
26  
27 81. Rosumeck S, Nast A, Dressler C. Ivermectin and permethrin for treating scabies.  
28 *Cochrane Database of Syst Rev.* 2018;4.  
29  
30 82. Rüschen H, Aravinth K, Bunce C, Bokre D. Use of hyaluronidase as an adjunct to local  
31 anaesthetic eye blocks to reduce intraoperative pain in adults. *Cochrane Database of Syst*  
32 *Rev.* 2018;3.  
33  
34 83. Ruthirakuhan MT, Herrmann N, Abraham EH, Chan S, Lanctôt KL. Pharmacological  
35 interventions for apathy in Alzheimer's disease. *Cochrane Database of Syst Rev.* 2018;5.  
36  
37 84. Sankar MJ, Sankar J, Chandra P. Anti-vascular endothelial growth factor (VEGF) drugs  
38 for treatment of retinopathy of prematurity. *Cochrane Database of Syst Rev.* 2018;1.  
39  
40 85. Schumann J, Henrich EC, Strobl H, Prondzinsky R, Weiche S, Thiele H, et al. Inotropic  
41 agents and vasodilator strategies for the treatment of cardiogenic shock or low cardiac  
42 output syndrome. *Cochrane Database of Syst Rev.* 2018;1.  
43  
44 86. Simancas-Racines D, Arevalo-Rodriguez I, Osorio D, Franco JV, Xu Y, Hidalgo R.  
45 Interventions for treating acute high altitude illness. *Cochrane Database of Syst Rev.*  
46 2018;6.  
47  
48  
49  
50  
51  
52  
53  
54  
55  
56  
57  
58  
59  
60



- 1  
2  
3 87. Smith S, Edwards CT. Long-acting inhaled bronchodilators for cystic fibrosis. *Cochrane*  
4 *Database of Syst Rev.* 2017;12.  
5  
6  
7 88. Smith LA, Burns E, Cuthbert A. Parenteral opioids for maternal pain management in  
8 labour. *Cochrane Database of Syst Rev.* 2018;6.  
9  
10 89. Soares-Weiser K, Rathbone J, Ogawa Y, Shinohara K, Bergman H. Miscellaneous  
11 treatments for antipsychotic-induced tardive dyskinesia. *Cochrane Database of Syst Rev.*  
12 2018;3.  
13  
14  
15 90. Squizzato A, Bellesini M, Takeda A, Middeldorp S, Donadini MP. Clopidogrel plus  
16 aspirin versus aspirin alone for preventing cardiovascular events. *Cochrane Database of*  
17 *Syst Rev.* 2017;12.  
18  
19  
20 91. St George G, Morgan A, Meechan J, Moles DR, Needleman I, Ng YL, et al. Injectable  
21 local anaesthetic agents for dental anaesthesia. *Cochrane Database of Syst Rev.* 2018;7.  
22  
23  
24 92. Stern A, Skalsky K, Avni T, Carrara E, Leibovici L, Paul M. Corticosteroids for  
25 pneumonia. *Cochrane Database of Syst Rev.* 2017;12.  
26  
27  
28 93. Sturman N, Deckx L, Driel MLv. Methylphenidate for children and adolescents with  
29 autism spectrum disorder. *Cochrane Database of Syst Rev.* 2017;11.  
30  
31 94. Tammenmaa-Aho I, Asher R, Soares-Weiser K, Bergman H. Cholinergic medication for  
32 antipsychotic-induced tardive dyskinesia. *Cochrane Database of Syst Rev.* 2018;3.  
33  
34 95. Temmingh HS, Williams T, Siegfried N, Stein DJ. Risperidone versus other  
35 antipsychotics for people with severe mental illness and co-occurring substance misuse.  
36 *Cochrane Database of Syst Rev.* 2018;1.  
37  
38  
39 96. Tenforde MW, Shapiro AE, Rouse B, Jarvis JN, Li T, Eshun-Wilson I, et al. Treatment  
40 for HIV-associated cryptococcal meningitis. *Cochrane Database of Syst Rev.* 2018;7.  
41  
42  
43 97. Toews I, George AT, Peter JV, Kirubakaran R, Fontes LES, Ezekiel JPB, et al.  
44 Interventions for preventing upper gastrointestinal bleeding in people admitted to  
45 intensive care units. *Cochrane Database of Syst Rev.* 2018;6.  
46  
47  
48 98. Venekamp RP, Mick P, Schilder AG, Nunez DA. Grommets (ventilation tubes) for  
49 recurrent acute otitis media in children. *Cochrane Database of Syst Rev.* 2018;5.  
50  
51 99. Vermeij JD, Westendorp WF, Dippel DW, Beek Dvd, Nederkoorn PJ. Antibiotic therapy  
52 for preventing infections in people with acute stroke. *Cochrane Database of Syst Rev.*  
53 2018;1.  
54  
55  
56  
57  
58  
59  
60

- 1  
2  
3 100. Vietto V, Franco JV, Saenz V, Cytryn D, Chas J, Ciapponi A. Prostanoids for critical  
4 limb ischaemia. *Cochrane Database of Syst Rev.* 2018;1.  
5  
6  
7 101. Wall EC, Ajdukiewicz KM, Bergman H, Heyderman RS, Garner P. Osmotic therapies  
8 added to antibiotics for acute bacterial meningitis. *Cochrane Database of Syst Rev.*  
9 2018;2.  
10  
11  
12 102. Weibel S, Jelting Y, Pace NL, Helf A, Eberhart LH, Hahnenkamp K, et al. Continuous  
13 intravenous perioperative lidocaine infusion for postoperative pain and recovery in adults.  
14 *Cochrane Database of Syst Rev.* 2018;6.  
15  
16  
17 103. Wright JM, Musini VM, Gill R. First-line drugs for hypertension. *Cochrane Database of*  
18 *Syst Rev.* 2018;4.  
19  
20  
21 104. Xiao Y, Luo M, Wang J, Luo H. Losigamone add-on therapy for focal epilepsy.  
22 *Cochrane Database of Syst Rev.* 2018;1.  
23  
24 105. Zhang X, Chuai Y, Nie W, Wang A, Dai G. Thrombopoietin receptor agonists for  
25 prevention and treatment of chemotherapy-induced thrombocytopenia in patients with  
26 solid tumours. *Cochrane Database of Syst Rev.* 2017;11.  
27  
28  
29 106. Zhou M, Chen N, He L, Yang M, Zhu C, Wu F. Oxcarbazepine for neuropathic pain.  
30 *Cochrane Database of Syst Rev.* 2017;12.  
31  
32  
33 107. Zonneveld TP, Richard E, Vergouwen MD, Nederkoorn PJ, Haan Rd, Roos YB, et al.  
34 Blood pressure-lowering treatment for preventing recurrent stroke, major vascular events,  
35 and dementia in patients with a history of stroke or transient ischaemic attack. *Cochrane*  
36 *Database of Syst Rev.* 2018;7.  
37  
38  
39 108. López - López JA, Sterne JAC, Thom HHZ, Higgins JPT, Hingorani AD, Okoli GN, et  
40 al. Oral anticoagulants for prevention of stroke in atrial fibrillation: systematic review,  
41 network meta-analysis, and cost effectiveness analysis. *BMJ (Clinical research ed).*  
42 2017;359.  
43  
44  
45 109. Wang W, Chen W, Liu Y, Siemieniuk RAC, Li L, Martínez JPD, et al. Antibiotics for  
46 uncomplicated skin abscesses: systematic review and network meta-analysis. *BMJ Open.*  
47 2018;8(2).  
48  
49  
50  
51 110. Cipriani A, Furukawa TA, Salanti G, Chaimani A, Atkinson LZ, Ogawa Y, et al.  
52 Comparative efficacy and acceptability of 21 antidepressant drugs for the acute treatment  
53  
54  
55  
56  
57  
58  
59

- of adults with major depressive disorder: a systematic review and network meta-analysis. *Lancet*. 2018;391(10128)1357-66.
- 111.Chen M, Ji M, Si X. The effects of statin therapy on mortality in patients with sepsis: A meta-analysis of randomized trials. *Medicine*. 2018;97(31).
- 112.Ding W, Li Z, Wang C, Ruan G, Chen L, Tu C. The CDK4/6 inhibitor in HR-positive advanced breast cancer: A systematic review and meta-analysis. *Medicine*. 2018;97(20).
- 113.Guo P, He Z, Wang Y, Gao F, Sun W, Guo W, et al. Efficacy and safety of oral tranexamic acid in total knee arthroplasty: A systematic review and meta-analysis. *Medicine*. 2018;97(18).
- 114.Han X, Zhang Y, Yin L, Zhang L, Wang Y, Zhang H, et al. Statin in the treatment of patients with myocardial infarction: A meta-analysis. *Medicine*. 2018;97(12).
- 115.Hu W, Tong J, Kuang X, Chen W, Liu Z. Influence of proton pump inhibitors on clinical outcomes in coronary heart disease patients receiving aspirin and clopidogrel: A meta-analysis. *Medicine*. 2018;97(3).
- 116.Huang ST, Tian BS, Xiao O, Yang YJ, Zhou SY. Safety of antivasular endothelial growth factor administration in the ocular anterior segment in pterygium and neovascular glaucoma treatment: Systematic review and meta-analysis. *Medicine*. 2018;97(34).
- 117.Jiang DQ, Xu LC, Jiang LL, Li MX, Wang Y. Fasudil combined with methylcobalamin or lipoic acid can improve the nerve conduction velocity in patients with diabetic peripheral neuropathy: A meta-analysis. *Medicine*. 2018;97(27).
- 118.Jiang Y, Sun X, Kong B, Jiang J. Antiangiogenesis therapy in ovarian cancer patients: An updated meta-analysis for 15 randomized controlled trials. *Medicine*. 2018;97(34).
- 119.Khan M, Lin J, Liao G, Tian Y, Liang Y, Li R, et al. Comparative analysis of immune checkpoint inhibitors and chemotherapy in the treatment of advanced non-small cell lung cancer: A meta-analysis of randomized controlled trials. *Medicine*. 2018;97(33).
- 120.Liang L, Cai Y, Li A, Ma C. The efficiency of intravenous acetaminophen for pain control following total knee and hip arthroplasty: A systematic review and meta-analysis. *Medicine*. 2017;96(46).
- 121.Liu X, Li X, Zhang C, Sun M, Sun Z, Xu Y, et al. Efficacy and tolerability of fluvoxamine in adults with social anxiety disorder: A meta-analysis. *Medicine*. 2018;97(28).

- 1  
2  
3  
4  
5  
6  
7  
8  
9  
10  
11  
12  
13  
14  
15  
16  
17  
18  
19  
20  
21  
22  
23  
24  
25  
26  
27  
28  
29  
30  
31  
32  
33  
34  
35  
36  
37  
38  
39  
40  
41  
42  
43  
44  
45  
46  
47  
48  
49  
50  
51  
52  
53  
54  
55  
56  
57  
58  
59  
60
122. Lor YC, Shih PC, Chen HH, Liu SJ, Chao HC, Hwang LC, et al. The application of lidocaine to alleviate the discomfort of nasogastric tube insertion: A systematic review and meta-analysis. *Medicine*. 2018;97(5).
123. Wang W, Yu J. Tranexamic acid reduces blood loss in intertrochanteric fractures: A meta-analysis from randomized controlled trials. *Medicine*. 2017;96(52).
124. Wang H, Liu A, Bo W, Feng X, Hu Y. Terlipressin in the treatment of hepatorenal syndrome: A systematic review and meta-analysis. *Medicine*. 2018;97(16).
125. Wang Z, Hu Z, Dai T. The comparison of propofol and midazolam for bronchoscopy: A meta-analysis of randomized controlled studies. *Medicine*. 2018;97(36).
126. Wei W, Luo Z. Risk of gastrointestinal toxicities with PD-1 inhibitors in cancer patients: A meta-analysis of randomized clinical trials. *Medicine*. 2017;96(48).
127. Woo HL, Ji HR, Pak YK, Lee H, Heo SJ, Lee JM, et al. The efficacy and safety of acupuncture in women with primary dysmenorrhea: A systematic review and meta-analysis. *Medicine*. 2018;97(23).
128. Xia Y, Fang H, Xu J, Jia C, Tao G, Yu B. Clinical efficacy of xenon versus propofol: A systematic review and meta-analysis. *Medicine*. 2018;97(20).
129. Yang Q, Zhang Z, Xin W, Li A. Preoperative intravenous glucocorticoids can decrease acute pain and postoperative nausea and vomiting after total hip arthroplasty: A PRISMA-compliant meta-analysis. *Medicine*. 2017;96(47).
130. Ye F, Wu Y, Zhou C. Effect of intravenous ketamine for postoperative analgesia in patients undergoing laparoscopic cholecystectomy: A meta-analysis. *Medicine*. 2017;96(51).
131. Yu L, Cao L, Sun J, Li Z, Yao F, Zhou Y. Serelaxin, recombinant human relaxin-2, for heart failure patients: A systematic review and meta-analysis. *Medicine*. 2018;97(25).
132. Yuan C, Xu XH, Luo SW, Wang L, Sun M, Ni LH, et al. Which neoadjuvant chemotherapy regimen should be recommended for patients with advanced nasopharyngeal carcinoma?: A network meta-analysis. *Medicine*. 2018;97(34).
133. Zhang JJ, Liu X. Aspirin plus dipyridamole has the highest surface under the cumulative ranking curves (SUCRA) values in terms of mortality, intracranial hemorrhage, and adverse event rate among 7 drug therapies in the treatment of cerebral infarction. *Medicine*. 2018;97(13).

- 1  
2  
3  
4  
5  
6  
7  
8  
9  
10  
11  
12  
13  
14  
15  
16  
17  
18  
19  
20  
21  
22  
23  
24  
25  
26  
27  
28  
29  
30  
31  
32  
33  
34  
35  
36  
37  
38  
39  
40  
41  
42  
43  
44  
45  
46  
47  
48  
49  
50  
51  
52  
53  
54  
55  
56  
57  
58  
59  
60
134. Zhang J, Cai WK, Zhang Z, Wang P, Lin XQ, Feng J, et al. Cardioprotective effect of histamine H<sub>2</sub> antagonists in congestive heart failure: A systematic review and meta-analysis. *Medicine*. 2018;97(15).
135. Zhao JB, Li YL, Wang YM, Teng JL, Xia DY, Zhao JS, et al. Intravenous lidocaine infusion for pain control after laparoscopic cholecystectomy: A meta-analysis of randomized controlled trials. *Medicine*. 2018;97(5).
136. Zhao T, Shen Z, Sheng S. The efficacy and safety of nefopam for pain relief during laparoscopic cholecystectomy: A meta-analysis. *Medicine*. 2018;97(10).
137. Zhou G, Ma L, Jing J, Jiang H. A meta-analysis of dexamethasone for pain management in patients with total knee arthroplasty. *Medicine*. 2018;97(35).
138. Zhu XT, Chen L, Lin JH. Selective COX-2 inhibitor versus non-selective COX-2 inhibitor for the prevention of heterotopic ossification after total hip arthroplasty: A meta-analysis. *Medicine*. 2018;97(31).
139. Zhou J, Zhang Q, Wang Y, Gao P, Chen D. The effect and safety of anacetrapib in the treatment of dyslipidemia: a systematic review and meta-analysis. *Postgrad Med*. 2018;130(1):129-36.
140. Zhang Y, Tao LN, Qu XY, Niu JQ, Ding YH, Zhang SX. Efficacy and safety of ceftazidime-avibactam in the treatment of complicated intra-abdominal infections (CIAIs) and complicated urinary tract infections (CUTIs): A meta-analysis of randomized controlled trials. *Rev Assoc Med Bras*. 2018;64(3):253-63.
141. Li F, Huang W, Zhang X. Efficacy and safety of different regimens for primary open-angle glaucoma or ocular hypertension: a systematic review and network meta-analysis. *Acta Ophthalmol*. 2018;96(3):e277-84.
142. Tarantini G, Ueshima D, Amico GD, Masiero G, Musumeci G, Stone GW, et al. Efficacy and safety of potent platelet P<sub>2</sub>Y<sub>12</sub> receptor inhibitors in elderly versus nonelderly patients with acute coronary syndrome: A systematic review and meta-analysis. *Am Heart J*. 2018;195:78-85.
143. Wang Y, Wang J, Wang S. Comparative Effectiveness of Inclisiran 100, 300, and 500 mg in a Population with Hyperlipidemia: A Network Meta-Analysis of Randomized Controlled Trials. *Am J Cardiovasc Drugs*. 2018;18(4):271-82.

- 1  
2  
3 144.Aman A, Salim B, Munshi K, Raza SA, Khan FA. Effect on neonatal outcome of  
4 pharmacological interventions for attenuation of the maternal haemodynamic response to  
5 tracheal intubation: a systematic review. *Anaesth Intensive Care*. 2018;46(3):258-71.  
6  
7 145.Li GM, Zhao J, Li B, Zhang XF, Ma JX, Ma XL, et al. The anti-inflammatory effects of  
8 statins on patients with rheumatoid arthritis: A systemic review and meta-analysis of 15  
9 randomized controlled trials. *Autoimmun Rev*. 2018;17(3):215-25.  
10  
11 146.Wang B, He X, Gong Y, Cheng B. Levosimendan in Patients with Left Ventricular  
12 Dysfunction Undergoing Cardiac Surgery: An Update Meta-Analysis and Trial  
13 Sequential Analysis. *BioMed Res Int*. 2018;2018:1-10.  
14  
15 147.Veettil SK, Lim KG, Ching SM, Saokaew S, Phisalprapa P, Chaiyakunapruk N. Effects  
16 of aspirin and non-aspirin nonsteroidal anti-inflammatory drugs on the incidence of  
17 recurrent colorectal adenomas: a systematic review with meta-analysis and trial  
18 sequential analysis of randomized clinical trials. *BMC Cancer*. 2017;17(1):763.  
19  
20 148.Bredemeier M, Lopes LM, Eisenreich MA, Hickmann S, Bongiorno GK, d'Avila R, et al.  
21 Xanthine oxidase inhibitors for prevention of cardiovascular events: a systematic review  
22 and meta-analysis of randomized controlled trials. *BMC Cardiovasc Disord*.  
23 2018;18(1):24.  
24  
25 149.Lyu Y, Cheng Y, Wang B, Xu Y, Du W. What is impact of nonsteroidal anti-  
26 inflammatory drugs in the prevention of post-endoscopic retrograde  
27 cholangiopancreatography pancreatitis: a meta-analysis of randomized controlled trials.  
28 *BMC Gastroenterol*. 2018;18(1):106.  
29  
30 150.Xing Y, Chen L, Feng Y, Zhou Y, Zhai Y, Lu J. Meta-analysis of the safety of  
31 voriconazole in definitive, empirical, and prophylactic therapies for invasive fungal  
32 infections. *BMC Infect Dis*. 2017;17(1):798..  
33  
34 151.Kuo LT, Hsu WH, Chi CC, Yoo JC. Tranexamic acid in total shoulder arthroplasty and  
35 reverse shoulder arthroplasty: a systematic review and meta-analysis. *BMC*  
36 *Musculoskelet Disord*. 2018;19(1):60.  
37  
38 152.Beez T, Steiger HJ, Etminan N. Pharmacological targeting of secondary brain damage  
39 following ischemic or hemorrhagic stroke, traumatic brain injury, and bacterial  
40 meningitis - a systematic review and meta-analysis. *BMC Neurol*. 2017;17(1):209.  
41  
42  
43  
44  
45  
46  
47  
48  
49  
50  
51  
52  
53  
54  
55  
56  
57  
58  
59

- 1  
2  
3 153.Zeng W, Liu Z, Dai H, Yan M, Luo H, Ke M, et al. Anti-fibrotic, anti-VEGF or  
4 radiotherapy treatments as adjuvants for pterygium excision: a systematic review and  
5 network meta-analysis. *BMC Ophthalmol.* 2017;17(1):211.  
6  
7  
8 154.Bundhun PK, Shi JX, Huang F. Head to head comparison of Prasugrel versus Ticagrelor  
9 in patients with acute coronary syndrome: a systematic review and meta-analysis of  
10 randomized trials. *BMC Pharmacol Toxicol.* 2017;18(1):80.  
11  
12  
13 155.Zhang Y, Liu Y, Su Y, You Y, Ma Y, Yang G, et al. The metabolic side effects of 12  
14 antipsychotic drugs used for the treatment of schizophrenia on glucose: a network meta-  
15 analysis. *BMC Psychiatry.* 2017;17(1):373.  
16  
17  
18 156.Zhang HL, Tan M, Qiu AM, Tao Z, Wang CH. Antibiotics for treatment of acute  
19 exacerbation of chronic obstructive pulmonary disease: a network meta-analysis. *BMC*  
20 *pulmonary medicine.* 2017;17(1):196.  
21  
22  
23 157.Zhang ZQ, Zhong Y, Huang XM, Du LZ. Airway administration of corticosteroids for  
24 prevention of bronchopulmonary dysplasia in premature infants: a meta-analysis with  
25 trial sequential analysis. *BMC Pulm Med.* 2017;17(1):207.  
26  
27  
28 158.Ramos-Esquivel A, Hernández-Steller H, Savard MF, Landaverde DU. Cyclin-dependent  
29 kinase 4/6 inhibitors as first-line treatment for post-menopausal metastatic hormone  
30 receptor-positive breast cancer patients: a systematic review and meta-analysis of phase  
31 III randomized clinical trials. *Breast Cancer.* 2018;25(4):479-88.  
32  
33  
34 159.Zeng C, Wei J, Persson MSM, Sarmanova A, Doherty M, Xie D, et al. Relative efficacy  
35 and safety of topical non-steroidal anti-inflammatory drugs for osteoarthritis: a systematic  
36 review and network meta-analysis of randomised controlled trials and observational  
37 studies. *Br J Sports Med.* 2018;52(10):642-50.  
38  
39  
40 160.Shui L, Wu YS, Lin H, Shui P, Sun Q, Chen X. Triplet Chemotherapy (FOLFOXIRI)  
41 Plus Bevacizumab Versus Doublet Chemotherapy (FOLFOX/FOLFIRI) Plus  
42 Bevacizumab in Conversion Therapy for Metastatic Colorectal Cancer: a Meta-Analysis.  
43 *Cell Physiol Biochem.* 2018;48(5):1870-81.  
44  
45  
46 161.Rodrigo C, Weeratunga P, Fernando SD, Rajapakse S. Amphotericin B for treatment of  
47 visceral leishmaniasis: systematic review and meta-analysis of prospective comparative  
48 clinical studies including dose-ranging studies. *Clin Microbiol Infect.* 2018;24(6):591-8.  
49  
50  
51  
52  
53  
54  
55  
56  
57  
58  
59  
60

- 1  
2  
3 162. Wang S, He Q, Shuai Z. Risk of serious infections in biological treatment of patients with  
4 ankylosing spondylitis and non-radiographic axial spondyloarthritis: a meta-analysis. *Clin*  
5 *Rheumatol.* 2018;37(2):439-50.  
6  
7  
8 163. Hong Y, Mansour S, Alotaibi G, Wu C, McMurtry MS. Effect of anticoagulants on  
9 admission rates and length of hospital stay for acute venous thromboembolism: A  
10 systematic review of randomized control trials. *Crit Rev Oncol Hematol.* 2018;125:12-18.  
11  
12 164. de Carvalho LSFd, Campos AM, Sposito AC. Proprotein Convertase Subtilisin/Kexin  
13 Type 9 (PCSK9) Inhibitors and Incident Type 2 Diabetes: A Systematic Review and  
14 Meta-analysis With Over 96,000 Patient-Years. *Diabetes Care.* 2018;41(2):364-7.  
15  
16 165. Jaafar MH, Safi SZ, Tan MP, Rampal S, Mahadeva S. Efficacy of Rebamipide in Organic  
17 and Functional Dyspepsia: A Systematic Review and Meta-Analysis. *Dig Dis Sci.*  
18 2018;63(5):1250-60.  
19  
20 166. Liu J, Wang LN. The efficacy and safety of riluzole for neurodegenerative movement  
21 disorders: a systematic review with meta-analysis. *Drug Deliv.* 2018;25(1):43-8.  
22  
23 167. Liu LY, Liu Y, Wu MY, Sun YY, Ma FZ. Efficacy of atorvastatin on the prevention of  
24 contrast-induced acute kidney injury: a meta-analysis. *Drug Des Devel Ther.*  
25 2018;12:437.  
26  
27 168. Sun S, Wang J, Bao N, Chen Y, Wang J. Comparison of dexmedetomidine and fentanyl  
28 as local anesthetic adjuvants in spinal anesthesia: a systematic review and meta-analysis  
29 of randomized controlled trials. *Drug Des Devel Ther.* 2017;11:3413.  
30  
31 169. Paraschakis A, Katsanos AH. Antidepressants for Depression Associated with Traumatic  
32 Brain Injury: A Meta-analytical Study of Randomised Controlled Trials. *East Asian Arch*  
33 *Psychiatry.* 2017;27(4):142.  
34  
35 170. D'Souza RS, Mercogliano C, Ojukwu E, Souza SD, Singles A, Modi J, et al. Effects of  
36 prophylactic anticholinergic medications to decrease extrapyramidal side effects in  
37 patients taking acute antiemetic drugs: a systematic review and meta-analysis. *Emerg*  
38 *Med J.* 2018;35(5):325-31.  
39  
40 171. Mei L, Hou Q, Fang F, Wang H. The antibody-based CA125-targeted maintenance  
41 therapy for the epithelial ovarian cancer: a meta-analysis. *Eur J Gynaecol Oncol.*  
42 2016;37(4):455-60.  
43  
44  
45  
46  
47  
48  
49  
50  
51  
52  
53  
54  
55  
56  
57  
58  
59  
60



- 1  
2  
3 172.Verberkt CA, Everdingen MHJvdB-v, Schols J, Datla S, Dirksen CD, Johnson MJ, et al.  
4 Respiratory adverse effects of opioids for breathlessness: a systematic review and meta-  
5 analysis. *Eur Respir J*. 2017;50(5):1701153.  
6  
7  
8 173.Sridharan K, Sivaramakrishnan G, Gnanaraj J. Pharmacological interventions for stress  
9 ulcer prophylaxis in critically ill patients: a mixed treatment comparison network meta-  
10 analysis and a recursive cumulative meta-analysis. *Expert Opin Pharmacother*.  
11 2018;19(2):151-8.  
12  
13  
14 174.Habibi MR, Habibi V, Habibi A, Soleimani A. Lidocaine dose-response effect on  
15 postoperative cognitive deficit: meta-analysis and meta-regression. *Expert Rev Clin*  
16 *Pharmacol*. 2018;11(4):361-71.  
17  
18  
19 175.Li Y, Liu H, Peng W, Song Z. Nicorandil improves clinical outcomes in patients with  
20 stable angina pectoris requiring PCI: a systematic review and meta-analysis of 14  
21 randomized trials. *Expert Rev Clin Pharmacol*. 2018;11(9):855-65.  
22  
23  
24 176.Sangroongruangsri S, Ratanapakorn T, Wu O, Anothaisintawee T, Chaikledkaew U.  
25 Comparative efficacy of bevacizumab, ranibizumab, and aflibercept for treatment of  
26 macular edema secondary to retinal vein occlusion: a systematic review and network  
27 meta-analysis. *Expert Rev Clin Pharmacol*. 2018;11(9):903-16.  
28  
29  
30 177.Hickey BA, Watson U, Cleves A, Alikhan R, Pugh N, Nokes L, et al. Does  
31 thromboprophylaxis reduce symptomatic venous thromboembolism in patients with  
32 below knee cast treatment for foot and ankle trauma? A systematic review and meta-  
33 analysis. *Foot Ankle Surg*. 2018;24(1):19-27.  
34  
35  
36 178.Zhao TT, Xu H, Xu HM, Wang ZN, Xu YY, Song YX, et al. The efficacy and safety of  
37 targeted therapy with or without chemotherapy in advanced gastric cancer treatment: a  
38 network meta-analysis of well-designed randomized controlled trials. *Gastric Cancer*.  
39 2018;21(3):361-71.  
40  
41  
42 179.Khera R, Pandey A, Chandar AK, Murad MH, Prokop LJ, Neeland IJ, et al. Effects of  
43 Weight-Loss Medications on Cardiometabolic Risk Profiles: A Systematic Review and  
44 Network Meta-analysis. *Gastroenterology*. 2018;154(5):1309-19.  
45  
46  
47 180.Li J, Li S, Yu H, Wang J, Xu C, Lu X. The efficacy and safety of first-line single-agent  
48 chemotherapy regimens in low-risk gestational trophoblastic neoplasia: A network meta-  
49 analysis. *Gynecol Oncol*. 2018;148(2):247-53.  
50  
51  
52  
53  
54  
55  
56  
57  
58  
59  
60

- 1  
2  
3 181. Zhuge L, Wang Y, Wu S, Zhao RL, Li Z, Xie Y. Furazolidone treatment for Helicobacter  
4 Pylori infection: A systematic review and meta-analysis. *Helicobacter*.  
5 2018;23(2):e12468.  
6  
7  
8 182. Kim MK, Myung SK, Tran BT, Park B. Statins and risk of cancer: A meta-analysis of  
9 randomized, double-blind, placebo-controlled trials. *Indian J Cancer*.54(2):470.  
10  
11 183. Garg R, Mohan BP, Krishnamoorthi R, Rustagi T. Pre-endoscopic retrograde  
12 cholangiopancreatography (ERCP) administration of rectal indomethacin in unselected  
13 patients to reduce post-ERCP pancreatitis: A systematic review and meta-analysis. *Indian*  
14 *J Gastroenterol*. 2018;37(2):120-6.  
15  
16 184. Rosanova MT, Bes D, Aguilar PS, Sberna N, Lede R. Efficacy and safety of voriconazole  
17 in immunocompromised patients: systematic review and meta-analysis. *Infect Dis (Lond)*.  
18 2018;50(7):489-94.  
19  
20 185. Yu J, Lu H, Zhou J, Xie Z, Wen C, Xu Z. Oral prednisolone versus non-steroidal anti-  
21 inflammatory drugs in the treatment of acute gout: a meta-analysis of randomized  
22 controlled trials. *Inflammopharmacology*. 2018;26(3):717-23.  
23  
24 186. Kakkos SK, Nicolaidis AN. Efficacy of micronized purified flavonoid fraction (Daflon)  
25 on improving individual symptoms, signs and quality of life in patients with chronic  
26 venous disease: a systematic review and meta-analysis of randomized double-blind  
27 placebo-controlled trials. *Int Angiol*. 2018;37(2).  
28  
29 187. Ou Z, Chen C, Chen A, Yang Y, Zhou W. Adverse events of Dupilumab in adults with  
30 moderate-to-severe atopic dermatitis: A meta-analysis. *Intimmunopharmacol*.  
31 2018;54:303-10.  
32  
33 188. Yin J, Xu B, Zeng X, Shen K. Broncho-Vaxom in pediatric recurrent respiratory tract  
34 infections: A systematic review and meta-analysis. *Int immunopharmacol*. 2018;54:198-  
35 209.  
36  
37 189. Zhu J, Zhao W, Liang D, Li G, Qiu K, Wu J, et al. Risk of fatigue in cancer patients  
38 receiving anti-EGFR monoclonal antibodies: results from a systematic review and meta-  
39 analysis of randomized controlled trial. *Int J Clin Oncol*. 2018;23(2):389-99.  
40  
41 190. Liu H, Xu X. Influence of adjunctive lacosamide in patients with seizures: a systematic  
42 review and meta-analysis. *Int J Neurosci*. 2018;128(7):670-6.  
43  
44  
45  
46  
47  
48  
49  
50  
51  
52  
53  
54  
55  
56  
57  
58  
59  
60

- 1  
2  
3 191.Coccolini F, Nardi M, Montori G, Ceresoli M, Celotti A, Cascinu S, et al. Neoadjuvant  
4 chemotherapy in advanced gastric and esophago-gastric cancer. Meta-analysis of  
5 randomized trials. *Int J Surgery*. 2018;51:120-7.  
6  
7  
8 192.Fan Z, Ma J, Kuang M, Zhang L, Han B, Yang B, et al. The efficacy of dexamethasone  
9 reducing postoperative pain and emesis after total knee arthroplasty: A systematic review  
10 and meta-analysis. *Int J Surgery*. 2018;52:149-55.  
11  
12  
13 193.Li J, Wang G, Xu W, Ding M, Yu W. Efficacy of intravenous lidocaine on pain relief in  
14 patients undergoing laparoscopic cholecystectomy: A meta-analysis from randomized  
15 controlled trials. *Int J Surgery*. 2018;50:137-45.  
16  
17  
18 194.Li S, Sheng G, Teng Y, Sun M. Systematic review of anaesthetic medication for ERCP  
19 based on a network meta-analysis. *Int J Surgery*. 2018;51:56-62.  
20  
21  
22 195.Liu Q, Geng P, Shi L, Wang Q, Wang P. Tranexamic acid versus aminocaproic acid for  
23 blood management after total knee and total hip arthroplasty: A systematic review and  
24 meta-analysis. *Int J Surgery*. 2018;54:105-12.  
25  
26  
27 196.Ran J, Yang X, Ren Z, Wang J, Dong H. Comparison of intra-articular hyaluronic acid  
28 and methylprednisolone for pain management in knee osteoarthritis: A meta-analysis of  
29 randomized controlled trials. *Int J Surgery*. 2018;53:103-10.  
30  
31  
32 197.Zhao M, Xiang P, Jiang H. TransArterial ChemoEmbolization (TACE) with platinum  
33 versus anthracyclines for hepatocellular carcinoma: A meta-analysis. *Int J Surgery*.  
34 2018;53:151-8.  
35  
36  
37 198.Zhu J, Xie H, Zhang L, Chang L, Chen P. Efficiency and safety of ketamine for pain  
38 relief after laparoscopic cholecystectomy: A meta-analysis from randomized controlled  
39 trials. *Int J Surgery*. 2018;49:1-9.  
40  
41  
42 199.Wagner G, Schultes MT, Titscher V, Teufer B, Klerings I, Gartlehner G. Efficacy and  
43 safety of levomilnacipran, vilazodone and vortioxetine compared with other second-  
44 generation antidepressants for major depressive disorder in adults: A systematic review  
45 and network meta-analysis. *J Affect Disord*. 2018;228:1-12.  
46  
47  
48 200.Hickman LC, Llarena NC, Valentine LN, Liu X, Falcone T. Preservation of gonadal  
49 function in women undergoing chemotherapy: a systematic review and meta-analysis of  
50 the potential role for gonadotropin-releasing hormone agonists. *J Assist Reprod Genet*.  
51 2018;35(4):571-81.  
52  
53  
54  
55  
56  
57  
58  
59  
60

- 1  
2  
3  
4 201.Luo W, Wang Z, Tian P, Li W. Safety and tolerability of PD-1/PD-L1 inhibitors in the  
5 treatment of non-small cell lung cancer: a meta-analysis of randomized controlled trials. *J*  
6 *Cancer Res Clin Oncol*. 2018;144(10):1851-9.  
7  
8  
9 202.Wang Y, Zhang H, Shen W, He P, Zhou Z. Effectiveness and tolerability of targeted  
10 drugs for the treatment of metastatic castration-resistant prostate cancer: a network meta-  
11 analysis of randomized controlled trials. *J Cancer Res Clin Oncol*. 2018;144(9):1751-68.  
12  
13 203.Wang DD, Ma TT, Zhu HD, Peng CB. Transdermal fentanyl for cancer pain: Trial  
14 sequential analysis of 3406 patients from 35 randomized controlled trials. *J Cancer Res*  
15 *Ther*. 2018;14(8):14.  
16  
17  
18 204.Aboul-Hassan SS, Stankowski T, Marczak J, Peksa M, Nawotka M, Stanislawski R, et al.  
19 The use of preoperative aspirin in cardiac surgery: A systematic review and meta-  
20 analysis. *J Card Surg*. 2017;32(12):758-74.  
21  
22  
23 205.Wang Y, Zhu S, R DU, Zhou J, Chen Y, Zhang Q. Statin initiation and renal outcomes  
24 following isolated coronary artery bypass grafting: a meta-analysis. *J Card Surg*.  
25 2018;59(2):282-90.  
26  
27  
28 206.Barrionuevo P, Nabhan M, Altayar O, Wang Z, Erwin PJ, Asi N, et al. Treatment Options  
29 for Hirsutism: A Systematic Review and Network Meta-Analysis. *J Clin Endocrinol*  
30 *Metabo*. 2018;103(4):1258-64.  
31  
32  
33 207.Cui JY, Zhou RR, Han S, Wang TS, Wang LQ, Xie XH. Statin therapy on glycemic  
34 control in type 2 diabetic patients: A network meta-analysis. *J Clin Pharm Ther*.  
35 2018;43(4):556-70.  
36  
37  
38 208.Sawyer L, Fotheringham I, Wright E, Yasmeen N, Gibbons C, Møller AH. The  
39 comparative efficacy of brodalumab in patients with moderate-to-severe psoriasis: a  
40 systematic literature review and network meta-analysis. *J Dermatolog Treat*.  
41 2018;29(6):557-68.  
42  
43  
44 209.Markey GC, Salter N, Ryan J. Intravenous Flecainide for Emergency Department  
45 Management of Acute Atrial Fibrillation. *J Emerg Med*. 2018;54(3):320-7.  
46  
47  
48 210.Szabó IL, Mátics R, Hegyi P, Garami A, Illés A, Sarlós P, et al. PPIs Prevent Aspirin-  
49 Induced Gastrointestinal Bleeding Better than H2RAs. A Systematic Review and Meta-  
50 analysis. *J Gastrointestin Liver Dis: JGLD*. 2017;26(4):395-402.  
51  
52  
53  
54  
55  
56  
57  
58  
59

- 1  
2  
3  
4  
5  
6  
7  
8  
9  
10  
11  
12  
13  
14  
15  
16  
17  
18  
19  
20  
21  
22  
23  
24  
25  
26  
27  
28  
29  
30  
31  
32  
33  
34  
35  
36  
37  
38  
39  
40  
41  
42  
43  
44  
45  
46  
47  
48  
49  
50  
51  
52  
53  
54  
55  
56  
57  
58  
59  
60
211. Su Q, Zhang XC, Zhang CG, Hou YL, Yao YX, Cao BW. Risk of Immune-Related Pancreatitis in Patients with Solid Tumors Treated with Immune Checkpoint Inhibitors: Systematic Assessment with Meta-Analysis. *J Immunol Res*. 2018;2018:1-9.
212. Chen C, Zhou X, Zhu M, Chen S, Chen J, Cai H, et al. Catheter ablation versus medical therapy for patients with persistent atrial fibrillation: a systematic review and meta-analysis of evidence from randomized controlled trials. *J Interv Card Electrophysiol*. 2018;52(1):9-18.
213. Chen X, Mou X, He Z, Zhu Y. The effect of midazolam on pain control after knee arthroscopy: a systematic review and meta-analysis. *J Orthop Surg Res*. 2017;12(1):179.
214. Li YJ, Xu BS, Bai SP, Guo XJ, Yan XY. The efficacy of intravenous aminocaproic acid in primary total hip and knee arthroplasty: a meta-analysis. *J Orthop Surg Res*. 2018;13(1).
215. Luo W, Sun RX, Jiang H, Ma XL. The efficacy and safety of topical administration of tranexamic acid in spine surgery: a meta-analysis. *J Orthop Surg Res*. 2018;13(1):96.
216. Ma R, Chen GH, Zhao LJ, Zhai XC. Efficacy of naproxen prophylaxis for the prevention of heterotopic ossification after hip surgery: a meta-analysis. *J Orthop Surg Res*. 2018;13(1):48.
217. He H, Wang W, Lyu J, Zheng J, Guo L, An X, et al. Efficacy and tolerability of different doses of three new antidepressants for treating major depressive disorder: A PRISMA-compliant meta-analysis. *J Psychiatr Res*. 2018;96:247-59.
218. Wang KL, Chiu CC, Giugliano RP, Tan DS, Lin CY, Lai EY, et al. Drug Class, Renal Elimination, and Outcomes of Direct Oral Anticoagulants in Asian Patients: A Meta-Analysis. *J Stroke Cerebrovasc Dis* : the official journal of National Stroke Association. 2018;27(4):857-64.
219. Dhana A, Yen H, Okhovat JP, Cho E, Keum N, Khumalo NP. Ivermectin versus permethrin in the treatment of scabies: A systematic review and meta-analysis of randomized controlled trials. *J Am Acad Dermatol*. 2018;78(1):194-98.
220. Karatasakis A, Danek BA, Karacsonyi J, Rangan BV, Roesle MK, Knickelbine T, et al. Effect of PCSK9 Inhibitors on Clinical Outcomes in Patients With Hypercholesterolemia: A Meta-Analysis of 35 Randomized Controlled Trials. *J Am Heart Assoc*. 2017;6(12):e006910.

- 1  
2  
3 221.Kuo CM, Tung TH, Wang SH, Chi CC. Efficacy and safety of tofacitinib for moderate-  
4 to-severe plaque psoriasis: a systematic review and meta-analysis of randomized  
5 controlled trials. *J Eur Acad of Dermatol Venereol*. 2018;32(3):355-62.  
6  
7 222.Liu W, Qian X, Ji W, Lu Y, Wei G, Wang Y. Effects and safety of Sinomenine in  
8 treatment of rheumatoid arthritis contrast to methotrexate: a systematic review and Meta-  
9 analysis. *J Tradit Chin Med*. 2016;36(5):564-77.  
10  
11 223.Zheng Y, Gu Q, Chen HW, Peng HM, Jia DY, Zhou Y, et al. Efficacy of amiodarone and  
12 lidocaine for preventing ventricular fibrillation after aortic cross-clamp release in open  
13 heart surgery: a meta-analysis of randomized controlled trials. *J Zhejiang Univ Sci*  
14 *B*.18(12):1113-22.  
15  
16 224.Fregonese F, Ahuja SD, Akkerman OW, Arakaki-Sanchez D, Ayakaka I, Baghaei P, et al.  
17 Comparison of different treatments for isoniazid-resistant tuberculosis: an individual  
18 patient data meta-analysis. *Lancet Respir Med*. 2018;6(4):265-75.  
19  
20 225.Bornstein NM, Guekht A, Vester J, Heiss WD, Gusev E, Hömberg V, et al. Safety and  
21 efficacy of Cerebrolysin in early post-stroke recovery: a meta-analysis of nine  
22 randomized clinical trials. *Neurol Sci*. 2018;39(4):629-40.  
23  
24 226.Chen HJ, Lin C, Lee CH, Chen YH. Efficacy and Safety of Bevacizumab Combined with  
25 Mitomycin C or 5-Fluorouracil in Primary Trabeculectomy: A Meta-Analysis of  
26 Randomized Clinical Trials. *Ophthalmic Res*. 2018;59(3):155-63.  
27  
28 227.Han C, Kuang MJ, Ma JX, Ma XL. The Efficacy of Preoperative Gabapentin in Spinal  
29 Surgery: A Meta-Analysis of Randomized Controlled Trials. *Pain Physician*.  
30 2017;20(7):649-61.  
31  
32 228.Peng K, Zhang J, Meng XW, Liu HY, Ji FH. Optimization of Postoperative Intravenous  
33 Patient-Controlled Analgesia with Opioid-Dexmedetomidine Combinations: An Updated  
34 Meta-Analysis with Trial Sequential Analysis of Randomized Controlled Trials. *Pain*  
35 *Physician*. 2017;20(7):569-96.  
36  
37 229.Feng M, Ding Q, Zhong C, Li J, Wang Q, Yuan Z, et al. Adjunctive therapy with V-5  
38 Immunitor (V5) for the treatment of tuberculosis patients: a meta-analysis. *Pharmazie*.  
39 2016;71(9):499-503.  
40  
41 230.Xu L, Zhang F, Du S, Yu Q, Chen L, Long LH, et al. Inhaled antibiotics in non-cystic  
42 fibrosis bronchiectasis: A meta-analysis. *Pharmazie*. 2016;71(9):491-8.  
43  
44  
45  
46  
47  
48  
49  
50  
51  
52  
53  
54  
55  
56  
57  
58  
59  
60

- 1  
2  
3 231. Palmeirim MS, Hürlimann E, Knopp S, Speich B, Belizario V, Joseph SA, et al. Efficacy  
4 and safety of co-administered ivermectin plus albendazole for treating soil-transmitted  
5 helminths: A systematic review, meta-analysis and individual patient data analysis. *PLoS*  
6 *Negl Trop Dis*. 2018;12(4):e0006458.  
7  
8  
9  
10 232. Furukawa TA, Efthimiou O, Weitz ES, Cipriani A, Keller MB, Kocsis JH, et al.  
11 Cognitive-Behavioral Analysis System of Psychotherapy, Drug, or Their Combination for  
12 Persistent Depressive Disorder: Personalizing the Treatment Choice Using Individual  
13 Participant Data Network Metaregression. *Psychother Psychosom*. 2018;87(3):140-53.  
14  
15 233. Liu X, Zhai T, Ma R, Luo C, Wang H, Liu L. Effects of uric acid-lowering therapy on the  
16 progression of chronic kidney disease: a systematic review and meta-analysis. *Ren Fail*.  
17 2018;40(1):289-97.  
18  
19 234. Miravittles M, Urrutia G, Mathioudakis AG, Ancochea J. Efficacy and safety of  
20 tiotropium and olodaterol in COPD: a systematic review and meta-analysis. *Respir Res*.  
21 2017;18(1):196.  
22  
23 235. Wang G, Zhang X, Zhang HP, Wang L, Kang Y, Barnes PJ, et al. Corticosteroid plus  $\beta$  2-  
24 agonist in a single inhaler as reliever therapy in intermittent and mild asthma: a proof-of-  
25 concept systematic review and meta-analysis. *Respir Res*. 2017;18(1):203.  
26  
27 236. Kawalec P, Holko P, Mofáko P, Pilc A. Comparative effectiveness of abatacept,  
28 apremilast, secukinumab and ustekinumab treatment of psoriatic arthritis: a systematic  
29 review and network meta-analysis. *Rheumatol Int*. 2018;38(2):189-201.  
30  
31 237. Malhotra K, Katsanos AH, Bilal M, Ishfaq MF, Goyal N, Tsiygoulis G. Cerebrovascular  
32 Outcomes With Proton Pump Inhibitors and Thienopyridines: A Systematic Review and  
33 Meta-Analysis. *Stroke*. 2018;49(2):312-8.  
34  
35 238. Zhang R, Lu Q, Wu Y. The Comparison of Midazolam and Propofol in Gastrointestinal  
36 Endoscopy: A Systematic Review and Meta-analysis. *Surg Laparosc Endosc Percutan*  
37 *Tech*. 2018;28(3):153-8.  
38  
39 239. Yamashita Y, Morimoto T, Toyota T, Shiomi H, Makiyama T, Ono K, et al. Asian  
40 patients versus non-Asian patients in the efficacy and safety of direct oral anticoagulants  
41 relative to vitamin K antagonist for venous thromboembolism: A systemic review and  
42 meta-analysis. *Thromb Res*. 2018;166:37-42.  
43  
44  
45  
46  
47  
48  
49  
50  
51  
52  
53  
54  
55  
56  
57  
58  
59  
60

- 1  
2  
3 240.Zhang W, Sun H, Atiquzzaman M, Sou J, Anis AH, Cooper C. Influenza vaccination for  
4 HIV-positive people: Systematic review and network meta-analysis. *Vaccine*.  
5 2018;36(28):4077-86.  
6  
7  
8 241.Chen H, Shen FE, Tan XD, Jiang WB, Gu YH. Efficacy and Safety of Acupuncture for  
9 Essential Hypertension: A Meta-Analysis. *Med Sci Monit*. 2018;24:2946.  
10  
11 242.Arteagoitia I, Andrés CR, Ramos E. Does chlorhexidine reduce bacteremia following  
12 tooth extraction? A systematic review and meta-analysis. *PloS one*.  
13 2018;13(4):e0195592.  
14  
15 243.Feng X, Tian M, Zhang W, Mei H. Gastrointestinal safety of etoricoxib in osteoarthritis  
16 and rheumatoid arthritis: A meta-analysis. *PloS one*. 2018;13(1).  
17  
18 244.Kawakami H, Mihara T, Nakamura N, Ka K, Goto T. Effect of magnesium added to local  
19 anesthetics for caudal anesthesia on postoperative pain in pediatric surgical patients: A  
20 systematic review and meta-analysis with Trial Sequential Analysis. *PloS one*.  
21 2018;13(1):e0190798.  
22  
23 245.Li X, Zhu L, Zhou C, Liu J, Du H, Wang C, et al. Efficacy and tolerability of short-term  
24 duloxetine treatment in adults with generalized anxiety disorder: A meta-analysis. *PloS*  
25 *one*. 2018;13(3):e0194501.  
26  
27 246.Lin YC, Lin JW, Wu MS, Chen KC, Peng CC, Kang YN. Effects of calcium channel  
28 blockers comparing to angiotensin-converting enzyme inhibitors and angiotensin receptor  
29 blockers in patients with hypertension and chronic kidney disease stage 3 to 5 and  
30 dialysis: A systematic review and meta-analysis. *PloS one*. 2017;12(12):e0188975.  
31  
32 247.Ling X, Zhou H, Ni Y, Wu C, Zhang C, Zhu Z. Does dexmedetomidine have an  
33 antiarrhythmic effect on cardiac patients? A meta-analysis of randomized controlled  
34 trials. *PloS one*. 2018;13(3):e0193303.  
35  
36 248.Rohner E, Grabik M, Tonia T, Jüni P, Pötvary F, Pignatti F, et al. Does access to clinical  
37 study reports from the European Medicines Agency reduce reporting biases? A  
38 systematic review and meta-analysis of randomized controlled trials on the effect of  
39 erythropoiesis-stimulating agents in cancer patients. *PloS one*. 2017;12(12):e0189309.  
40  
41 249.Sethi NJ, Nielsen EE, Safi S, Feinberg J, Gluud C, Jakobsen JC. Digoxin for atrial  
42 fibrillation and atrial flutter: A systematic review with meta-analysis and trial sequential  
43 analysis of randomised clinical trials. *PloS one*. 2018;13(3):e0193924.  
44  
45  
46  
47  
48  
49  
50  
51  
52  
53  
54  
55  
56  
57  
58  
59



- 1  
2  
3 250. Wolf S, Hoffmann VS, Habicht A, Kauke T, Bucher J, Schoenberg M, et al. Effects of  
4 mTOR-Is on malignancy and survival following renal transplantation: A systematic  
5 review and meta-analysis of randomized trials with a minimum follow-up of 24 months.  
6  
7 *PloS one*. 2018;13(4):e0194975.  
8  
9  
10  
11  
12  
13  
14  
15  
16  
17  
18  
19  
20  
21  
22  
23  
24  
25  
26  
27  
28  
29  
30  
31  
32  
33  
34  
35  
36  
37  
38  
39  
40  
41  
42  
43  
44  
45  
46  
47  
48  
49  
50  
51  
52  
53  
54  
55  
56  
57  
58  
59  
60



# PRISMA 2009 Checklist

1  
2  
3  
4  
5  
6  
7  
8  
9  
10  
11  
12  
13  
14  
15  
16  
17  
18  
19  
20  
21  
22  
23  
24  
25  
26  
27  
28  
29  
30  
31  
32  
33  
34  
35  
36  
37  
38  
39  
40  
41  
42  
43  
44  
45  
46  
47

| Section/topic                      | #  | Checklist item                                                                                                                                                                                                                                                                                              | Reported on page # |
|------------------------------------|----|-------------------------------------------------------------------------------------------------------------------------------------------------------------------------------------------------------------------------------------------------------------------------------------------------------------|--------------------|
| <b>TITLE</b>                       |    |                                                                                                                                                                                                                                                                                                             |                    |
| Title                              | 1  | Identify the report as a systematic review, meta-analysis, or both.                                                                                                                                                                                                                                         | N/A                |
| <b>ABSTRACT</b>                    |    |                                                                                                                                                                                                                                                                                                             |                    |
| Structured summary                 | 2  | Provide a structured summary including, as applicable: background; objectives; data sources; study eligibility criteria, participants, and interventions; study appraisal and synthesis methods; results; limitations; conclusions and implications of key findings; systematic review registration number. | 3,4                |
| <b>INTRODUCTION</b>                |    |                                                                                                                                                                                                                                                                                                             |                    |
| Rationale                          | 3  | Describe the rationale for the review in the context of what is already known.                                                                                                                                                                                                                              | 5,6                |
| Objectives                         | 4  | Provide an explicit statement of questions being addressed with reference to participants, interventions, comparisons, outcomes, and study design (PICOS).                                                                                                                                                  | 6                  |
| <b>METHODS</b>                     |    |                                                                                                                                                                                                                                                                                                             |                    |
| Protocol and registration          | 5  | Indicate if a review protocol exists, if and where it can be accessed (e.g., Web address), and, if available, provide registration information including registration number.                                                                                                                               | 6                  |
| Eligibility criteria               | 6  | Specify study characteristics (e.g., PICOS, length of follow-up) and report characteristics (e.g., years considered, language, publication status) used as criteria for eligibility, giving rationale.                                                                                                      | 6,7                |
| Information sources                | 7  | Describe all information sources (e.g., databases with dates of coverage, contact with study authors to identify additional studies) in the search and date last searched.                                                                                                                                  | 7                  |
| Search                             | 8  | Present full electronic search strategy for at least one database, including any limits used, such that it could be repeated.                                                                                                                                                                               | eMethods1          |
| Study selection                    | 9  | State the process for selecting studies (i.e., screening, eligibility, included in systematic review, and, if applicable, included in the meta-analysis).                                                                                                                                                   | 6-8                |
| Data collection process            | 10 | Describe method of data extraction from reports (e.g., piloted forms, independently, in duplicate) and any processes for obtaining and confirming data from investigators.                                                                                                                                  | 8-10               |
| Data items                         | 11 | List and define all variables for which data were sought (e.g., PICOS, funding sources) and any assumptions and simplifications made.                                                                                                                                                                       | 8-12               |
| Risk of bias in individual studies | 12 | Describe methods used for assessing risk of bias of individual studies (including specification of whether this was done at the study or outcome level), and how this information is to be used in any data synthesis.                                                                                      | N/A                |
| Summary measures                   | 13 | State the principal summary measures (e.g., risk ratio, difference in means).                                                                                                                                                                                                                               | 3, 10,11           |
| Synthesis of results               | 14 | Describe the methods of handling data and combining results of studies, if done, including measures of consistency (e.g., I <sup>2</sup> ) for each meta-analysis.                                                                                                                                          | 10,11              |



# PRISMA 2009 Checklist

Page 1 of 2

| Section/topic                 | #  | Checklist item                                                                                                                                                                                           | Reported on page #       |
|-------------------------------|----|----------------------------------------------------------------------------------------------------------------------------------------------------------------------------------------------------------|--------------------------|
| Risk of bias across studies   | 15 | Specify any assessment of risk of bias that may affect the cumulative evidence (e.g., publication bias, selective reporting within studies).                                                             | N/A                      |
| Additional analyses           | 16 | Describe methods of additional analyses (e.g., sensitivity or subgroup analyses, meta-regression), if done, indicating which were pre-specified.                                                         | 11                       |
| <b>RESULTS</b>                |    |                                                                                                                                                                                                          |                          |
| Study selection               | 17 | Give numbers of studies screened, assessed for eligibility, and included in the review, with reasons for exclusions at each stage, ideally with a flow diagram.                                          | 12, Figure 1             |
| Study characteristics         | 18 | For each study, present characteristics for which data were extracted (e.g., study size, PICOS, follow-up period) and provide the citations.                                                             | 12, 13, 26, 27 (Table 1) |
| Risk of bias within studies   | 19 | Present data on risk of bias of each study and, if available, any outcome level assessment (see item 12).                                                                                                | N/A                      |
| Results of individual studies | 20 | For all outcomes considered (benefits or harms), present, for each study: (a) simple summary data for each intervention group (b) effect estimates and confidence intervals, ideally with a forest plot. | N/A                      |
| Synthesis of results          | 21 | Present results of each meta-analysis done, including confidence intervals and measures of consistency.                                                                                                  | N/A                      |
| Risk of bias across studies   | 22 | Present results of any assessment of risk of bias across studies (see Item 15).                                                                                                                          | N/A                      |
| Additional analysis           | 23 | Give results of additional analyses, if done (e.g., sensitivity or subgroup analyses, meta-regression [see Item 16]).                                                                                    | 28 (Table 2)             |
| <b>DISCUSSION</b>             |    |                                                                                                                                                                                                          |                          |
| Summary of evidence           | 24 | Summarize the main findings including the strength of evidence for each main outcome; consider their relevance to key groups (e.g., healthcare providers, users, and policy makers).                     | 15-17                    |
| Limitations                   | 25 | Discuss limitations at study and outcome level (e.g., risk of bias), and at review-level (e.g., incomplete retrieval of identified research, reporting bias).                                            | 17                       |
| Conclusions                   | 26 | Provide a general interpretation of the results in the context of other evidence, and implications for future research.                                                                                  | 15-17                    |
| <b>FUNDING</b>                |    |                                                                                                                                                                                                          |                          |
| Funding                       | 27 | Describe sources of funding for the systematic review and other support (e.g., supply of data); role of funders for the systematic review.                                                               | 19                       |

From: Moher D, Liberati A, Tetzlaff J, Altman DG, The PRISMA Group (2009). Preferred Reporting Items for Systematic Reviews and Meta-Analyses: The PRISMA Statement. PLoS Med 6(6): e1000097. doi:10.1371/journal.pmed1000097

For peer review only - <http://bmjopen.bmj.com/site/about/guidelines.xhtml>  
For more information, visit: [www.prisma-statement.org](http://www.prisma-statement.org)

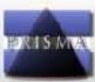

# PRISMA 2009 Checklist

- 1
- 2
- 3
- 4
- 5
- 6
- 7
- 8
- 9
- 10
- 11
- 12
- 13
- 14
- 15
- 16
- 17
- 18
- 19
- 20
- 21
- 22
- 23
- 24
- 25
- 26
- 27
- 28
- 29
- 30
- 31
- 32
- 33
- 34
- 35
- 36
- 37
- 38
- 39
- 40
- 41
- 42
- 43
- 44
- 45
- 46
- 47

For peer review only
