# Supplementary material for: Reporting of drug trial funding sources and author financial conflicts of interest in Cochrane and non-Cochrane meta-analyses: a cross-sectional study
Source: PubMed Central journal article supplement — BMJ Open. 2020 May 11;10(5):e035633. doi: 10.1136/bmjopen-2019-035633 (PMC7229983; doi:10.1136/bmjopen-2019-035633), 2020-05-11
Supplement: bmjopen-2019-035633supp001.pdf [file bmjopen-2019-035633supp001.pdf]

## Supplementary Material

**eMethods1.** Search strategy

**eMethods2.** Data extraction form

**eMethods3.** Power analysis

**eTable1.** Detailed characteristics of included meta-analyses

**eTable2.** Detailed reporting of study funding source, author-industry financial ties, and author-industry employment from included RCTs

**eMethods1.** Search strategy

To obtain our sample, we searched the MEDLINE database via PubMed on October 19, 2018 using the following search strategy:

```
((("Randomized Controlled Trials as Topic"[Mesh] or randomized control trial [tiab] or randomized controled trial [tiab] OR randomized controlled trial [tiab] or randomized control trials [tiab] OR randomized controled trials [tiab] OR Randomized controlled trials [tiab] or randomised control trial [tiab] or randomised controled trial [tiab] OR randomised controlled trial [tiab] or randomised control trials [tiab] OR randomised controled trials [tiab] OR Randomised controlled trials [tiab]) AND ("Therapeutic Uses"[Mesh] OR "Vaccines"[Mesh]) AND ("Meta-Analysis" [Publication Type] or meta analysis [tiab]) AND (systematic review [tiab] OR search [tiab] or searched [tiab] or MEDLINE [tiab] OR PubMed [tiab])))
```

**eMethods 2.** Data extraction form

**First Author, last name:** Last name of first author of meta-analysis

**Year of publication (or in press):** Year of publication of meta-analysis

**Journal:** Name of journal in which meta-analysis was published

**Journal Impact factor:** Where meta-analysis published (low-high split or continuous based on data distribution)

**Specialty area of Journal:** Where meta-analysis published (per Thomson Reuters Journal Science Citation Index - Expanded categories)

**Cochrane Review (Y/N):** Is the meta-analysis a Cochrane Review? Select "Yes" even if the Cochrane Review is being published in another journal

Response from radio options:

- Y (Yes)
- N (No)

**Journal policies for reporting COI of Included Trials:** Presence or absence of instructions for reporting in the author instructions

- Y (Yes)
- N (No)

**# of RCTs synthesized in Meta-Analysis** (total RCTs in included meta-analysis related to drugs)

**Date Range of Included Trials:** Date range in years of publication of studies (RCTs) included related to drugs in the meta-analysis (XXXX - XXXX). Use "In press" for end date if there are in press trials. Use "Unpublished" if a trial is in progress or has never been published.

**Study population:** Characteristics of study population of included trials (e.g. condition/disorder, adult/child)

**Pharmacological agent:** Pharmacologic treatment evaluated in the meta-analysis

- Name(s) of treatment if specific drug(s) investigated
- Class of treatment if broader category of drugs investigated, and number of drugs evaluated (e.g. SSRIs – 5 included)

**Control/comparison arms:** Other treatment arms (control/comparison) included in the meta-analysis (e.g. placebo, name of comparison pharmacologic treatment, name of behavioral intervention)

**Meta-Analysis Author Financial Ties / Funding Sources Reported:** Does the meta-analysis report meta-analysis author financial ties (including former and current industry employment) and/or the funding source? Note that reporting "no funding" is different from not reporting.

Response from radio options:

- Meta-analysis author financial ties
- Meta-analysis funding sources
- Both financial ties and funding sources
- Neither reported

**Funding Source of Meta-Analysis (if applicable – only shown if above item indicates meta-analysis funding sources reported or both financial ties and meta-analysis funding sources reported)** Source of financial support for the meta-analysis:

Response from radio options:

- Industry
- Combined industry and non-industry

- Non-industry (e.g. public granting agency, private not-for-profit granting agency)
- No study funding

**Type of Industry Funding (if applicable – only shown if above item indicates industry funding or combined industry and non-industry present):** If the meta-analysis is industry funded, what is the type of support provided by industry? Response from radio options:

- Financial support
- Resources (e.g. statistical analyses)
- Both financial support and resources

**# of Meta-Analysis Authors:** Number of authors of the meta-analysis (count authors named in byline or in an author group)

**# of Meta-Analysis Authors with Financial Ties to Industry (if applicable – only shown if meta-analysis author financial ties or both financial ties and meta-analysis funding sources are reported):** Number of authors of the meta-analysis who have financial ties such as industry board member, consultant, investments, patents, research funding, royalties (including former, and excluding current industry employment):

- Numbers 0 -  $\geq 10$

**# Meta-Analysis Authors with Current Industry Employment (if applicable – only shown if meta-analysis author financial ties or both financial ties and meta-analysis funding sources are reported):** Number of authors of the meta-analysis who are current industry employees.

Response from radio options:

Numbers 0 -  $\geq 10$

**Quality or Risk Assessment of Included RCTs (Y/N):** Was quality or risk assessment of included RCTs, by methods from Cochrane, Jadad, etc., reported in the meta-analysis.

Response from radio options:

- Y (Yes)
- N (No)

**Quality or Risk Assessment Method of Included RCTs (if applicable – only shown if answer to previous item is yes- quality or risk assessment of included RCTs is reported):** If the meta-analysis authors report a quality or risk assessment method of included RCTs, what is the reported method of quality assessment?

**Meta-analysis Authors Report Funding Sources of Included Studies:** Response from radio options:

- Reported for each included study
- Reported in summary statement or for some, but not all, trials
- Included study funding sources not reported

**Placement in publication of Included RCTs' Funding Source** (if applicable – only shown if the response to Meta-analysis Authors Report Funding Sources of Included Studies is (1) Reported for Each included Study or (2) Reported in summary statement or for some, but not all, trials):

- Abstract
- Main text, other than risk of bias or quality section
- In risk of bias or quality assessment
- Other in main document (e.g., a characteristics of studies table, other table, in a footnote of a table)
- Online appendix
- Lay Summary

**Placement in risk of bias or quality assessment of Included RCTs' Funding Source** (if applicable – only shown if placement in publication of included RCT's Funding Source is risk of bias or quality assessment):

- Text
- Figure/table
- Both text and figure/table

**Meta-analysis Authors Report Author Financial Ties of Included Studies:** Response from radio options:

- Reported for each included study
- Reported in summary statement or for some, but not all, trials
- Included study author financial ties not reported

**Placement in publication of Included RCTs' Author Financial Ties** (if applicable – only shown if the response Meta-analysis Authors Report Author Financial Ties of Included Studies is (1) Reported for Each included Study or (2) Reported in summary statement or for some, but not all, trials):

- Abstract
- Main text, other than risk of bias or quality section
- In risk of bias or quality assessment
- Other in main document (e.g., a characteristics of studies table, other table, in a footnote of a table
- Online appendix
- Lay Summary

**Placement in risk of bias or quality assessment of Included RCTs' Author Financial Ties** (if applicable – only shown if placement in publication of included RCT's Author Financial ties is risk of bias or quality assessment):

- Text
- Figure/table
- Both text and figure/table

**Meta-analysis Authors Report Author Industry Employment of Included Studies:** Do the authors of the meta-analysis report current author industry affiliation (employment) for the included studies? Response from radio options:

- Reported for each included study
- Reported in summary statement or for some, but not all, trials
- Included study author industry employment not reported

**Placement in publication of Included RCTs' Author Industry Employment** (if applicable – only shown if the response to Meta-analysis Authors Report Author Industry Affiliation (Employment) of Included Studies is (1) Reported for Each included Study or (2) Reported in summary statement or for some, but not all, trials):

- Abstract
- Main text, other than risk of bias or quality section
- In risk of bias or quality assessment
- Other in main document (e.g., a characteristics of studies table, other table, in a footnote of a table)
- Online appendix
- Lay Summary

**Placement in risk of bias or quality assessment of Included RCTs' Author Industry Employment** (only shown if placement in publication of included RCT's Author Industry Affiliation is risk of bias or quality assessment):

- Text
- Figure/table
- Both text and figure/table

**Do the authors report a PROSPERO registration number in the text?**

- Yes
- No

**What is the registration number (e.g., CRD42017062454)?** (if applicable – only shown if the response to Do the authors report a PROSPERO registration number in the text? Is yes)

**What stages were completed (ignore started) at the time of registration. Make sure to select the earliest registration version at the bottom of the page. Please check all stages that were completed.** (if applicable – only shown if the response to Do the authors report a PROSPERO registration number in the text? Is yes)

- Preliminary searches



- Piloting of the study selection process
- Formal screening of search results against eligibility criteria
- Data extraction
- Risk of bias (quality) assessment
- Data analysis
- None completed

**Was a registration found in PROSPERO?** (if applicable – only shown if the response to Do the authors report a PROSPERO registration number in the text? Is no)

**What is the registration number (e.g., CRD42017062454)?** (if applicable – only shown if the response to Was a registration found in PROSPERO? Is yes)

**What stages were completed (ignore started) at the time of registration. Make sure to select the earliest registration version at the bottom of the page. Please check all stages that were completed.** (if applicable – only shown if the response to Was a registration found in PROSPERO? Is yes)

- Preliminary searches
- Piloting of the study selection process
- Formal screening of search results against eligibility criteria
- Data extraction
- Risk of bias (quality) assessment
- Data analysis
- None completed

**eMethods3. Power analysis****Allocation ratio: 50% and 50% (1:1)**

| 20% difference              |                |                        |                        |                      |              |              |
|-----------------------------|----------------|------------------------|------------------------|----------------------|--------------|--------------|
| Proportion reporting<br>COI |                | Sample size<br>group 1 | Sample size<br>group 2 | Sample size<br>total | Actual power | Actual alpha |
| Low impact                  | High<br>impact |                        |                        |                      |              |              |
| 10%                         | 30%            | 69                     | 69                     | 138                  | .807         | .033         |
| 20%                         | 40%            | 90                     | 90                     | 180                  | .802         | .037         |
| 30%                         | 50%            | 102                    | 102                    | 204                  | .806         | .042         |
| 40%                         | 60%            | 102                    | 102                    | 204                  | .801         | .038         |
| 50%                         | 70%            | 102                    | 102                    | 204                  | .806         | .036         |
| 60%                         | 80%            | 90                     | 90                     | 180                  | .802         | .032         |
| 70%                         | 90%            | 69                     | 69                     | 138                  | .807         | .025         |

**Allocation ratio: 30% and 70% (3:7)**

| 20% difference              |                |                        |                        |                      |              |              |
|-----------------------------|----------------|------------------------|------------------------|----------------------|--------------|--------------|
| Proportion reporting<br>COI |                | Sample size<br>group 1 | Sample size<br>group 2 | Sample size<br>total | Actual power | Actual alpha |
| Low impact                  | High<br>impact |                        |                        |                      |              |              |
| 10%                         | 30%            | 105                    | 44                     | 149                  | .815         | .038         |
| 20%                         | 40%            | 141                    | 59                     | 200                  | .807         | .040         |
| 30%                         | 50%            | 165                    | 69                     | 234                  | .801         | .045         |
| 40%                         | 60%            | 168                    | 71                     | 239                  | .805         | .043         |
| 50%                         | 70%            | 166                    | 70                     | 236                  | .864         | .042         |
| 60%                         | 80%            | 148                    | 62                     | 210                  | .802         | .040         |
| 70%                         | 90%            | 133                    | 47                     | 160                  | .802         | .035         |

**eTable1.** Detailed characteristics of included meta-analyses**eTable1.** Detailed characteristics of included meta-analyses

| First Author                      | Year | Journal                                 | 2017 Impact Factor | Specialty Area               | Meta-analysis Funding source(s) | Number of Meta-analysis Authors with Industry Financial Ties / Number of Meta-analysis Authors <sup>a</sup> | Number of drug RCTs Included | Publication Dates of included drug RCTs | Population                                                                  | Drug Intervention(s)                                                                                                                  | Comparison Arm(s)                                               |
|-----------------------------------|------|-----------------------------------------|--------------------|------------------------------|---------------------------------|-------------------------------------------------------------------------------------------------------------|------------------------------|-----------------------------------------|-----------------------------------------------------------------------------|---------------------------------------------------------------------------------------------------------------------------------------|-----------------------------------------------------------------|
| <b>Cochrane Reviews (n = 107)</b> |      |                                         |                    |                              |                                 |                                                                                                             |                              |                                         |                                                                             |                                                                                                                                       |                                                                 |
| Abdel-Rahman <sup>1</sup>         | 2018 | Cochrane Database of Systematic Reviews | 6.8                | Medicine, General & Internal | Non-industry                    | 0/3                                                                                                         | 7                            | 2004-2016                               | Adults (19 years and over) with advanced biliary tract carcinomas           | Gemcitabine, vandetanib, S-1 (tegafur + gimeracil + oteracil), gemcitabine + oxaliplatin, 5-fluorouracil + folinic acid, capecitabine | Best supportive care, 5-fluorouracil + cisplatin + radiotherapy |
| Adams <sup>2</sup>                | 2018 | Cochrane Database of Systematic Reviews | 6.8                | Medicine, General & Internal | Non-industry                    | 0/4                                                                                                         | 36                           | 1994-2012                               | Participants with or without evidence of cardiovascular disease             | Fluvastatin                                                                                                                           | Placebo                                                         |
| Agabio <sup>3</sup>               | 2018 | Cochrane Database of Systematic Reviews | 6.8                | Medicine, General & Internal | Non-industry                    | 0/3                                                                                                         | 27                           | 1969-2015                               | People with co-occurring depression and alcohol dependence                  | Antidepressants - 16 types, diazepam, memantine                                                                                       | Placebo, psychotherapy                                          |
| Al-Shahi Salman <sup>4</sup>      | 2018 | Cochrane Database of Systematic Reviews | 6.8                | Medicine, General & Internal | Not reported                    | 0/5                                                                                                         | 11 <sup>b</sup>              | 1999-2015                               | Adults (16 years and over) with acute spontaneous intracerebral haemorrhage | Blood clotting factors, antifibrinolytic drugs                                                                                        | Placebo, open control, fresh frozen plasma                      |
| Alabed <sup>5</sup>               | 2018 | Cochrane Database of Systematic Reviews | 6.8                | Medicine, General & Internal | Non-industry                    | 0/4                                                                                                         | 11                           | 1976-2008                               | Patients with antipsychotic-induced tardive dyskinesia (TD)                 | Gamma-aminobutyric acid agonists - 6 types                                                                                            | Placebo                                                         |
| Allegretti <sup>6</sup>           | 2017 | Cochrane Database of Systematic Reviews | 6.8                | Medicine, General & Internal | No funding                      | 3/8                                                                                                         | 8                            | 1998-2016                               | Patients with hepatorenal syndrome                                          | Terlipressin, terlipressin + albumin                                                                                                  | Placebo, no intervention, albumin                               |
| Arechabala <sup>7</sup>           | 2018 | Cochrane Database of Systematic Reviews | 6.8                | Medicine, General & Internal | Non-industry                    | 0/7                                                                                                         | 37                           | 1998-2017                               | Patients undergoing haemodialysis using a central venous catheter           | Antibiotic antimicrobial lock solutions - 11 types, non-antibiotic antimicrobial lock                                                 | Heparin, saline                                                 |

|                        |      |                                         |     |                              |              |     |                 |           |                                                                                                                                     |                                                                                                                                                                                                                                                                                                                                           |                                                      |
|------------------------|------|-----------------------------------------|-----|------------------------------|--------------|-----|-----------------|-----------|-------------------------------------------------------------------------------------------------------------------------------------|-------------------------------------------------------------------------------------------------------------------------------------------------------------------------------------------------------------------------------------------------------------------------------------------------------------------------------------------|------------------------------------------------------|
| Baandrup <sup>8</sup>  | 2018 | Cochrane Database of Systematic Reviews | 6.8 | Medicine, General & Internal | No funding   | 1/6 | 33 <sup>c</sup> | 1981-2016 | Adult (18 years and over) chronic benzodiazepine users<br>Individuals with antiphospholipid antibodies and no history of thrombosis | solutions - 10 types, antibiotic + non-antibiotic antimicrobial lock solutions - 3 types<br>Valproate, carbamazepine, lithium, pregabalin, captopriam, paroxetine, tricyclic antidepressants - 4 types, alpidem, buspirone, flumazenil, propranolol, progesterone, magnesium aspartate, bromazepam, cyamemazine, zopiclone, flunitrazepam | Placebo, no intervention                             |
| Bala <sup>9</sup>      | 2018 | Cochrane Database of Systematic Reviews | 6.8 | Medicine, General & Internal | Non-industry | 3/6 | 9               | 1997-2016 | Heterosexual adult couples (18 years or more) with a partner having a clinical diagnosis of depressive disorder                     | Aspirin + anticoagulants, aspirin, aspirin + low molecular weight heparin                                                                                                                                                                                                                                                                 | Placebo, immunoglobulin, unfractionated heparin      |
| Barbato <sup>10</sup>  | 2018 | Cochrane Database of Systematic Reviews | 6.8 | Medicine, General & Internal | Non-industry | 0/3 | 4 <sup>d</sup>  | 2000-2012 | Psychiatric patients with antipsychotic-induced tardive dyskinesia                                                                  | Antidepressants - 9 types                                                                                                                                                                                                                                                                                                                 | Couples therapy                                      |
| Bergman <sup>11</sup>  | 2018 | Cochrane Database of Systematic Reviews | 6.8 | Medicine, General & Internal | Non-industry | 0/3 | 4               | 1981-1997 |                                                                                                                                     | Benzodiazepines - 3 types<br>Tricyclic antidepressants (TCAs), selective serotonin reuptake inhibitors (SSRIs), monoamine oxidase inhibitors (MAOIs), serotonin-norepinephrine reuptake inhibitors (SNRIs), norepinephrine reuptake inhibitors (NRIs), nefazodone, ritanserin                                                             | Placebo, usual care                                  |
| Bighelli <sup>12</sup> | 2018 | Cochrane Database of Systematic Reviews | 6.8 | Medicine, General & Internal | Non-industry | 2/9 | 41              | 1989-2011 | Adults (18 years and over) with panic disorder                                                                                      |                                                                                                                                                                                                                                                                                                                                           | Placebo                                              |
| Birks <sup>13</sup>    | 2018 | Cochrane Database of Systematic Reviews | 6.8 | Medicine, General & Internal | Non-industry | 0/2 | 30              | 1996-2017 | People with Alzheimer's disease                                                                                                     | Donepezil                                                                                                                                                                                                                                                                                                                                 | Placebo                                              |
| Boyapati <sup>14</sup> | 2018 | Cochrane Database of Systematic Reviews | 6.8 | Medicine, General & Internal | Non-industry | 3/8 | 6               | 1978-2017 | Adults (18 years and over) with quiescent Crohn's disease                                                                           | Azathioprine, infliximab                                                                                                                                                                                                                                                                                                                  | No treatment, usual care (azathioprine + infliximab) |

|                            |      |                                         |     |                              |              |                  |                |           |                                                                                                                                                                                   |                                                                                                                                                |                                                               |
|----------------------------|------|-----------------------------------------|-----|------------------------------|--------------|------------------|----------------|-----------|-----------------------------------------------------------------------------------------------------------------------------------------------------------------------------------|------------------------------------------------------------------------------------------------------------------------------------------------|---------------------------------------------------------------|
| Brown <sup>15</sup>        | 2018 | Cochrane Database of Systematic Reviews | 6.8 | Medicine, General & Internal | Non-industry | 0/4              | 5              | 1993-2017 | Women of reproductive age with endometriosis                                                                                                                                      | Combined oral contraceptive pill - 3 types                                                                                                     | Placebo, leuprolide, goserelin                                |
| Bruins Slot <sup>16</sup>  | 2018 | Cochrane Database of Systematic Reviews | 6.8 | Medicine, General & Internal | Non-industry | 1/2 <sup>e</sup> | 13             | 2008-2014 | Adults with atrial fibrillation<br>People with schizophrenia and schizophrenia-like disorders such as schizophreniform disorder, delusional disorder, or schizoaffective disorder | Factor Xa inhibitors - 7 types                                                                                                                 | Warfarin                                                      |
| Bryan <sup>17</sup>        | 2017 | Cochrane Database of Systematic Reviews | 6.8 | Medicine, General & Internal | No funding   | 0/3              | 20             | 1968-2007 | Women of reproductive age with heavy menstrual bleeding                                                                                                                           | Zuclopenthixol dihydrochloride<br>Antifibrinolytic agents - 2 types, non-steroidal anti-inflammatory drugs (NSAIDs), progestogens, ethamsylate | Placebo, other drugs - 11 types                               |
| Bryant-Smith <sup>18</sup> | 2018 | Cochrane Database of Systematic Reviews | 6.8 | Medicine, General & Internal | No funding   | 1/4              | 13             | 1970-2016 | Adults (17 years and over) in non-ICU acute care settings diagnosed with delirium                                                                                                 | Antipsychotics - 5 types                                                                                                                       | Placebo, herbal medicines, levonorgestrel intrauterine system |
| Burry <sup>19</sup>        | 2018 | Cochrane Database of Systematic Reviews | 6.8 | Medicine, General & Internal | Non-industry | 0/9              | 9              | 1996-2016 | Adult patients (18 years and older) with ureteral stone disease                                                                                                                   | Alpha-blockers - 6 types                                                                                                                       | Nonantipsychotics, placebo                                    |
| Campschroer <sup>20</sup>  | 2018 | Cochrane Database of Systematic Reviews | 6.8 | Medicine, General & Internal | Non-industry | 0/4              | 67             | 2002-2017 | Adults with cancer and adults receiving palliative care with opioid-induced bowel dysfunction                                                                                     | Mu-opioid antagonists - 3 types                                                                                                                | Placebo, usual care                                           |
| Candy <sup>21</sup>        | 2018 | Cochrane Database of Systematic Reviews | 6.8 | Medicine, General & Internal | Non-industry | 0/5              | 8              | 1996-2017 | Patients with paracetamol (acetaminophen) overdose                                                                                                                                | Methionine, cysteamine, dimercaprol, acetylcysteine                                                                                            | Placebo, no treatment                                         |
| Chiew <sup>22</sup>        | 2018 | Cochrane Database of Systematic Reviews | 6.8 | Medicine, General & Internal | Non-industry | 0/4              | 9 <sup>f</sup> | 1976-2014 | Children aged up to five years with a clinical diagnosis of community-acquired pneumonia (CAP)                                                                                    | Vitamin D                                                                                                                                      | Placebo, antibiotics alone                                    |
| Das <sup>23</sup>          | 2018 | Cochrane Database of Systematic Reviews | 6.8 | Medicine, General & Internal | Not reported | 0/3              | 7              | 2010-2017 | Healthy individuals (16 to 65 years) and pregnant women and their newborns                                                                                                        | Inactivated parenteral influenza vaccine                                                                                                       | Placebo, no treatment                                         |

|                            |      |                                         |     |                              |              |     |    |           |                                                                                                                                                  |                                                                                                                                                               |                                                                                |
|----------------------------|------|-----------------------------------------|-----|------------------------------|--------------|-----|----|-----------|--------------------------------------------------------------------------------------------------------------------------------------------------|---------------------------------------------------------------------------------------------------------------------------------------------------------------|--------------------------------------------------------------------------------|
| Demicheli <sup>25</sup>    | 2018 | Cochrane Database of Systematic Reviews | 6.8 | Medicine, General & Internal | Non-industry | 1/7 | 8  | 1969-2004 | Elderly participants (65 years and over)                                                                                                         | Influenza vaccines<br>Fondaparinux, rivaroxaban, low molecular weight heparin, non-steroidal anti-inflammatory drugs, vasotonin, sulodexide,                  | Placebo                                                                        |
| Di Nisio <sup>26</sup>     | 2018 | Cochrane Database of Systematic Reviews | 6.8 | Medicine, General & Internal | Non-industry | 2/3 | 32 | 1970-2017 | Patients with superficial thrombophlebitis of the leg or diagnosis of a thrombus in a superficial vein                                           | heparansulphate, vitamin K antagonists, enzyme therapy, unfractionated heparin, heparin calcium, defibrotide                                                  | Placebo, elastic stockings                                                     |
| El-Sayeh <sup>27</sup>     | 2018 | Cochrane Database of Systematic Reviews | 6.8 | Medicine, General & Internal | Non-industry | 0/4 | 10 | 1973-2010 | Patients with antipsychotic-induced tardive dyskinesia                                                                                           | Noradrenergic drugs - 2 types, dopaminergic drugs - 7 types                                                                                                   | Placebo                                                                        |
| Engelen <sup>28</sup>      | 2018 | Cochrane Database of Systematic Reviews | 6.8 | Medicine, General & Internal | Non-industry | 0/5 | 3  | 1989-2015 | People of all ages on continuous vitamin K antagonist (VKA) or direct oral anticoagulant (DOAC) treatment undergoing an oral or dental procedure | Antifibrinolytic agents - 2 types<br>Selective serotonin reuptake inhibitors (SSRIs) - 4 types, tricyclic antidepressants (TCAs) - 2 types                    | Usual care (surgical treatment), usual care (surgical treatment) + placebo     |
| Eshun-Wilson <sup>29</sup> | 2018 | Cochrane Database of Systematic Reviews | 6.8 | Medicine, General & Internal | Non-industry | 1/6 | 10 | 1994-2014 | Adults (18 years and over) living with HIV and depression                                                                                        | People with antipsychotic-induced tardive dyskinesia                                                                                                          | Placebo, mirtazapine                                                           |
| Essali <sup>30</sup>       | 2018 | Cochrane Database of Systematic Reviews | 6.8 | Medicine, General & Internal | Non-industry | 0/4 | 3  | 1992-1997 | Adults (18 years and over) with insomnia                                                                                                         | Calcium channel blockers - 3 types<br>Selective serotonin reuptake inhibitors - 4 types; tricyclic antidepressants - 3 types; other antidepressants - 6 types | Placebo                                                                        |
| Everitt <sup>31</sup>      | 2018 | Cochrane Database of Systematic Reviews | 6.8 | Medicine, General & Internal | Non-industry | 3/8 | 23 | 1978-2013 | Regular tobacco smokers (20 years and under)                                                                                                     | Nicotine replacement therapy, bupropion                                                                                                                       | Placebo, insomnia medication - 2 types                                         |
| Fanshawe <sup>32</sup>     | 2017 | Cochrane Database of Systematic Reviews | 6.8 | Medicine, General & Internal | Non-industry | 0/6 | 4  | 2004-2014 | Subfertile women of reproductive age with polycystic ovary syndrome                                                                              | Letrozole                                                                                                                                                     | Placebo<br>Placebo, selective estrogen receptor modulators, clomiphene citrate |
| Franik <sup>33</sup>       | 2018 | Cochrane Database of Systematic Reviews | 6.8 | Medicine, General & Internal | Non-industry | 0/5 | 42 | 2004-2017 |                                                                                                                                                  |                                                                                                                                                               |                                                                                |

|                              |      |                                         |     |                              |              |      |                 |                   |                                                                                                                      |                                                                               |                                                                                                                                |
|------------------------------|------|-----------------------------------------|-----|------------------------------|--------------|------|-----------------|-------------------|----------------------------------------------------------------------------------------------------------------------|-------------------------------------------------------------------------------|--------------------------------------------------------------------------------------------------------------------------------|
| González <sup>34</sup>       | 2018 | Cochrane Database of Systematic Reviews | 6.8 | Medicine, General & Internal | Non-industry | 0/6  | 6               | 1994-2014         | Pregnant women living in malaria-endemic areas                                                                       | Mefloquine                                                                    | followed by intrauterine insemination, laparoscopic ovarian drilling, follicle-stimulating hormone, anastrozole                |
| Grabosch <sup>35</sup>       | 2018 | Cochrane Database of Systematic Reviews | 6.8 | Medicine, General & Internal | Non-industry | 0/3  | 3               | 2006-2017         | Adult women with moderate or severe cervical intraepithelial neoplasia (CIN)                                         | Non-steroidal anti-inflammatory agents (NSAIDs) - 2 types                     | Sulfadoxine-pyrimethamine, cotrimoxazole, placebo                                                                              |
| Graves <sup>36</sup>         | 2018 | Cochrane Database of Systematic Reviews | 6.8 | Medicine, General & Internal | Non-industry | 0/4  | 24 <sup>h</sup> | 1981-2017         | Adults and children being treated for falciparum malaria                                                             | Primaquine                                                                    | Usual treatment, bulaquine                                                                                                     |
| Haas <sup>37</sup>           | 2018 | Cochrane Database of Systematic Reviews | 6.8 | Medicine, General & Internal | Non-industry | 0/4  | 11              | 1997-2017         | Pregnant women who were about to receive a cesarean delivery                                                         | Antiseptic solutions - 3 types                                                | Placebo, no treatment                                                                                                          |
| Hakoum <sup>38</sup>         | 2018 | Cochrane Database of Systematic Reviews | 6.8 | Medicine, General & Internal | Non-industry | 0/10 | 15              | 1991-2009         | People with cancer and venous thromboembolism                                                                        | Low molecular weight heparin, unfractionated heparin                          | Fondaparinux                                                                                                                   |
| Heras-Mosteiro <sup>39</sup> | 2017 | Cochrane Database of Systematic Reviews | 6.8 | Medicine, General & Internal | Non-industry | 0/10 | 89              | 1990-2015         | Immunocompetent patients with localised Old World cutaneous leishmaniasis                                            | Antimonials – 2 types, non-antimonials – 22 types                             | Placebo, no treatment, alternative therapies - 7 types, other drug comparators - 6 types, other non-drug comparators - 4 types |
| Janmaat <sup>40</sup>        | 2017 | Cochrane Database of Systematic Reviews | 6.8 | Medicine, General & Internal | Non-industry | 0/8  | 41              | 1980-2015         | People with esophageal or gastroesophageal junction cancer                                                           | Chemotherapy, targeted therapy, EGFR-targeting agents, cetuximab, ramucirumab | Best supportive care, unspecified control                                                                                      |
| Jefferson <sup>41</sup>      | 2018 | Cochrane Database of Systematic Reviews | 6.8 | Medicine, General & Internal | Non-industry | 1/4  | 41              | 1971-2016         | Healthy children (15 years and under)                                                                                | Influenza vaccine - 2 types                                                   | Placebo, no intervention                                                                                                       |
| Jung <sup>42</sup>           | 2017 | Cochrane Database of Systematic Reviews | 6.8 | Medicine, General & Internal | Non-industry | 0/6  | 19              | 2006- Unpublished | Middle-aged and older men (40 or over) with lower urinary tract symptoms as a result of benign prostatic hyperplasia | Silodosin, tamsulosin, naftopidil, and alfuzosin                              | Placebo                                                                                                                        |

|                           |      |                                         |     |                              |              |      |    |           |                                                                       |                                                                                                                                                                                                                                                                                    |                                                                |
|---------------------------|------|-----------------------------------------|-----|------------------------------|--------------|------|----|-----------|-----------------------------------------------------------------------|------------------------------------------------------------------------------------------------------------------------------------------------------------------------------------------------------------------------------------------------------------------------------------|----------------------------------------------------------------|
| Kaempfen <sup>43</sup>    | 2018 | Cochrane Database of Systematic Reviews | 6.8 | Medicine, General & Internal | Non-industry | 0/4  | 3  | 2013-2017 | Preterm infants                                                       | Propranolol                                                                                                                                                                                                                                                                        | Placebo, no treatment                                          |
| Kahale <sup>44</sup>      | 2017 | Cochrane Database of Systematic Reviews | 6.8 | Medicine, General & Internal | Non-industry | 0/10 | 7  | 1979-2012 | Ambulatory people with cancer                                         | Warfarin, apixaban                                                                                                                                                                                                                                                                 | Placebo, no treatment                                          |
| Kahale <sup>45</sup>      | 2018 | Cochrane Database of Systematic Reviews | 6.8 | Medicine, General & Internal | Non-industry | 0/10 | 13 | 1990-2013 | People with cancer and central venous catheters                       | Anticoagulant - 6 types<br>Vitamin K antagonist - 2 types, direct oral anticoagulant - 4 types;                                                                                                                                                                                    | Placebo, no treatment                                          |
| Kahale <sup>46</sup>      | 2018 | Cochrane Database of Systematic Reviews | 6.8 | Medicine, General & Internal | Non-industry | 0/11 | 16 | 2001-2018 | People with cancer and venous thromboembolism                         | low molecular weight heparin - 4 types                                                                                                                                                                                                                                             | Anticoagulants                                                 |
| Kapur <sup>47</sup>       | 2018 | Cochrane Database of Systematic Reviews | 6.8 | Medicine, General & Internal | Non-industry | 3/5  | 7  | 1992-2012 | Children and adults with bronchiectasis                               | Corticosteroids - 3 types                                                                                                                                                                                                                                                          | Placebo, no treatment                                          |
| Kelly <sup>48</sup>       | 2018 | Cochrane Database of Systematic Reviews | 6.8 | Medicine, General & Internal | Non-industry | 2/8  | 15 | 1997-2014 | Adults and children with bronchiectasis                               | Macrolide antibiotics - 4 types                                                                                                                                                                                                                                                    | Placebo, no intervention                                       |
| Knightly <sup>49</sup>    | 2017 | Cochrane Database of Systematic Reviews | 6.8 | Medicine, General & Internal | Non-industry | 0/7  | 25 | 1996-2017 | Adults and children with acute exacerbation of asthma                 | Magnesium sulfate                                                                                                                                                                                                                                                                  | β2 -agonist, β2 -agonist + ipratropium, placebo                |
| Kopsaftis <sup>50</sup>   | 2018 | Cochrane Database of Systematic Reviews | 6.8 | Medicine, General & Internal | Non-industry | 0/3  | 11 | 1961-2004 | People with chronic obstructive pulmonary disease                     | Inactivated influenza vaccine<br>Aminosalicylates - 4 types, corticosteroids, superoxide dismutase, amifostine, bile acid sequestrants, magnesium oxide, misoprostol, octreotide, selenium, sodium butyrate, sucralfate, ibuprofen, famotidine, smectite, simethicone, tropisetron | Placebo                                                        |
| Lawrie <sup>51</sup>      | 2018 | Cochrane Database of Systematic Reviews | 6.8 | Medicine, General & Internal | Non-industry | 0/9  | 38 | 1978-2016 | Adults (18 years and over) undergoing radiotherapy for pelvic cancers |                                                                                                                                                                                                                                                                                    | Placebo, no treatment                                          |
| Leathersich <sup>52</sup> | 2018 | Cochrane Database of Systematic Reviews | 6.8 | Medicine, General & Internal | Non-industry | 0/4  | 8  | 1987-2007 | Women with signs of fetal distress                                    | Tocolytic agents – 7 types                                                                                                                                                                                                                                                         | Usual care, emergency delivery, cessation of oxytocic infusion |
| Lethaby <sup>53</sup>     | 2017 | Cochrane Database of Systematic Reviews | 6.8 | Medicine, General & Internal | Non-industry | 1/3  | 38 | 1989-2012 | Women with uterine fibroids                                           | Gonadotropin-hormone releasing analogue,                                                                                                                                                                                                                                           | Placebo, no treatment                                          |



|                          |      |                                                               |     |                              |                         |      |    |           |                                                                                                                                                                           |                                                                                 |                                            |                                                        |
|--------------------------|------|---------------------------------------------------------------|-----|------------------------------|-------------------------|------|----|-----------|---------------------------------------------------------------------------------------------------------------------------------------------------------------------------|---------------------------------------------------------------------------------|--------------------------------------------|--------------------------------------------------------|
| López-Briz <sup>54</sup> | 2018 | Systematic Reviews<br>Cochrane Database of Systematic Reviews | 6.8 | Medicine, General & Internal | Non-industry            | 0/6  | 11 | 2002-2015 | Adults with central venous catheters                                                                                                                                      | Heparin                                                                         | selective progesterone-receptor modulators | 0.9% sodium chloride (normal saline solution)          |
| Marchant <sup>55</sup>   | 2018 | Cochrane Database of Systematic Reviews                       | 6.8 | Medicine, General & Internal | Non-industry            | 2/4  | 3  | 1993-2012 | Children (18 years and under) with prolonged wet cough (longer than 10 days)                                                                                              | Antibiotics - 2 types                                                           |                                            | Placebo, no treatment                                  |
| Matar <sup>56</sup>      | 2018 | Cochrane Database of Systematic Reviews                       | 6.8 | Medicine, General & Internal | Non-industry            | 0/3  | 7  | 1963-1999 | Patients with schizophrenia                                                                                                                                               | Fluphenazine                                                                    |                                            | Placebo                                                |
| Matar <sup>57</sup>      | 2018 | Cochrane Database of Systematic Reviews                       | 6.8 | Medicine, General & Internal | Non-industry            | 0/11 | 20 | 1986-2018 | People with solid or hematologic cancer undergoing surgery                                                                                                                | Low-molecular weight heparin (LMWH) - 10 types                                  |                                            | Unfractionated heparin (UFH), fondaparinux             |
| McNicol <sup>58</sup>    | 2018 | Cochrane Database of Systematic Reviews                       | 6.8 | Medicine, General & Internal | Non-industry            | 1/3  | 13 | 1992-2016 | Postoperative paediatric patients (17 years and under) Children (16 years and under) presenting to a hospital or emergency department in an acute tonic-clonic convulsion | Ketorolac                                                                       |                                            | Placebo, opioid                                        |
| McTague <sup>59</sup>    | 2018 | Cochrane Database of Systematic Reviews                       | 6.8 | Medicine, General & Internal | Non-industry            | 0/3  | 18 | 1995-2014 |                                                                                                                                                                           | Lorazepam                                                                       |                                            | Diazepam + phenytoin, diazepam, paraldehyde, midazolam |
| Mhaskar <sup>60</sup>    | 2017 | Cochrane Database of Systematic Reviews                       | 6.8 | Medicine, General & Internal | Non-industry            | 0/4  | 24 | 1982-2015 | Patients with multiple myeloma (MM)                                                                                                                                       | Bisphosphonates - 5 types                                                       |                                            | Placebo, no treatment - Network meta-analysis          |
| Milligan <sup>61</sup>   | 2018 | Cochrane Database of Systematic Reviews                       | 6.8 | Medicine, General & Internal | Non-industry            | 0/4  | 18 | 1980-2016 | Adults and children                                                                                                                                                       | Typhoid fever vaccines - 4 types                                                |                                            | No treatment, placebo, typhoid-inactive agents         |
| Monk <sup>62</sup>       | 2017 | Cochrane Database of Systematic Reviews                       | 6.8 | Medicine, General & Internal | Non-industry            | 0/4  | 32 | 1993-2016 | People undergoing orthodontic treatment                                                                                                                                   | Tramadol, non-steroidal anti-inflammatory drugs, paracetamol, local anaesthetic |                                            | Placebo, no treatment                                  |
| Montero <sup>63</sup>    | 2018 | Cochrane Database of Systematic Reviews                       | 6.8 | Medicine, General & Internal | No funding <sup>i</sup> | 1/7  | 10 | 1991-2012 | Patients with hepatitis C virus-associated mixed cryoglobulinaemia                                                                                                        | Rituximab, interferon, immunosuppressive drug therapy                           |                                            | Usual care, immunoadsorption apheresis                 |
| Mücke <sup>64</sup>      | 2018 | Cochrane Database of                                          | 6.8 | Medicine, General & Internal | Non-industry            | 2/5  | 16 | 2004-2017 | Adults (18 years and over) with chronic neuropathic pain                                                                                                                  | Cannabis-based medicines - 5 types                                              |                                            | Placebo, dihydrocodeine                                |

|                          |      |                                                               |     |                              |              |     |                 |                   |                                                                                                         |                                                                                           |                                                                   |
|--------------------------|------|---------------------------------------------------------------|-----|------------------------------|--------------|-----|-----------------|-------------------|---------------------------------------------------------------------------------------------------------|-------------------------------------------------------------------------------------------|-------------------------------------------------------------------|
| Narula <sup>65</sup>     | 2018 | Systematic Reviews<br>Cochrane Database of Systematic Reviews | 6.8 | Medicine, General & Internal | Non-industry | 3/7 | 10 <sup>j</sup> | 1990-2014         | Adults and children with Crohn's disease                                                                | Corticosteroids - 5 types                                                                 | Enteral nutrition                                                 |
| Nevitt <sup>66</sup>     | 2017 | Cochrane Database of Systematic Reviews                       | 6.8 | Medicine, General & Internal | Non-industry | 1/5 | 76              | 1981-2015         | Adults or children with partial onset seizures or generalised onset tonic-clonic seizures               | Antiepileptic drugs - 10 types                                                            | Network meta-analysis                                             |
| Nevitt <sup>67</sup>     | 2018 | Cochrane Database of Systematic Reviews                       | 6.8 | Medicine, General & Internal | Non-industry | 1/4 | 14              | 1995-2015         | Adults and children with focal onset or generalised onset seizures                                      | Lamotrigine                                                                               | Carbamazepine                                                     |
| Norman <sup>68</sup>     | 2018 | Cochrane Database of Systematic Reviews                       | 6.8 | Medicine, General & Internal | Non-industry | 1/6 | 78              | 1985-2016         | Adults (18 years and over) with venous leg ulcers                                                       | Topical agents - 10 types                                                                 | Dressings - 12 types;<br>Network meta-analysis                    |
| Normansell <sup>69</sup> | 2018 | Cochrane Database of Systematic Reviews                       | 6.8 | Medicine, General & Internal | Non-industry | 0/6 | 6               | 1974-2016         | Children and adults with acute asthma exacerbation                                                      | Antibiotics - 4 types<br>Propranolol, timolol maleate, bleomycin, atenolol, prednisolone, | Placebo                                                           |
| Novoa <sup>70</sup>      | 2018 | Cochrane Database of Systematic Reviews                       | 6.8 | Medicine, General & Internal | Non-industry | 1/7 | 24              | 1977-2016         | Children (17 years and under) with single or multiple haemangiomas located on the skin                  | captopril, ibuprofen + paracetamol, methylene blue, triamcinolone, methylprednisolone     | Placebo, radiation, lasers                                        |
| Ohlsson <sup>71</sup>    | 2017 | Cochrane Database of Systematic Reviews                       | 6.8 | Medicine, General & Internal | No funding   | 0/2 | 34              | 1991-2017         | Preterm (< 37 weeks' gestation) and low birth weight (< 2500 grams) infants less than eight days of age | Erythropoiesis-stimulating agents (ESAs) - 2 types                                        | Placebo, no treatment                                             |
| Ostinelli <sup>72</sup>  | 2018 | Cochrane Database of Systematic Reviews                       | 6.8 | Medicine, General & Internal | No funding   | 1/5 | 3               | 2005-2016         | Adults exhibiting aggression or agitation (or both) due to psychosis                                    | Aripiprazole                                                                              | Placebo, other anti-psychotic medications - 2 types               |
| Ostinelli <sup>73</sup>  | 2018 | Cochrane Database of Systematic Reviews                       | 6.8 | Medicine, General & Internal | Non-industry | 0/6 | 9               | 2010-2014         | Patients with psychosis-induced aggression or agitation                                                 | Risperidone                                                                               | Haloperidol, olanzapine, quetiapine, oxcarbazepine, valproic acid |
| Ostuzzi <sup>74</sup>    | 2018 | Cochrane Database of Systematic Reviews                       | 6.8 | Medicine, General & Internal | Non-industry | 1/5 | 7               | 1985- Unpublished | Adults (18 years and over) with cancer and depression                                                   | Antidepressants - 6 types                                                                 | Placebo                                                           |

|                            |      |                                         |     |                              |              |                |     |           |                                                                                            |                                                                                                                                                               |                                                                                                                                                                                                                             |
|----------------------------|------|-----------------------------------------|-----|------------------------------|--------------|----------------|-----|-----------|--------------------------------------------------------------------------------------------|---------------------------------------------------------------------------------------------------------------------------------------------------------------|-----------------------------------------------------------------------------------------------------------------------------------------------------------------------------------------------------------------------------|
| Parker <sup>75</sup>       | 2018 | Cochrane Database of Systematic Reviews | 6.8 | Medicine, General & Internal | Non-industry | 2/5            | 2   | 2011-2013 | Children and adults with active Crohn's disease                                            | Naltrexone                                                                                                                                                    | Placebo<br>Tamoxifen, interferon-alpha, interleukin-2, interferon-alpha + interleukin-2, Bacille Calmette-Guérin (BCG), corynebacterium parvum, anti-PD1 monoclonal antibodies, sorafenib, elesclomo, anti-angiogenic drugs |
| Pasquali <sup>76</sup>     | 2018 | Cochrane Database of Systematic Reviews | 6.8 | Medicine, General & Internal | Non-industry | 0/5            | 122 | 1972-2015 | Patients with unresectable lymph node metastasis and distant metastatic cutaneous melanoma | Single agent chemotherapy, polychemotherapy, temozolomide, dacarbazine, anti-CTLA4 monoclonal antibodies, other immunostimulating agents, MEK inhibitors      |                                                                                                                                                                                                                             |
| Pike <sup>77</sup>         | 2018 | Cochrane Database of Systematic Reviews | 6.8 | Medicine, General & Internal | Non-industry | 0/4            | 4   | 2007-2017 | Children (18 years and under) with asthma                                                  | Omalizumab, leukotriene receptor antagonists - 2 types, corticosteroids                                                                                       | Placebo                                                                                                                                                                                                                     |
| Rirash <sup>78</sup>       | 2017 | Cochrane Database of Systematic Reviews | 6.8 | Medicine, General & Internal | Not reported | Not reported/8 | 38  | 1982-2000 | Patients with Raynaud's phenomenon                                                         | Calcium channel blockers                                                                                                                                      | Placebo                                                                                                                                                                                                                     |
| Robertson <sup>79</sup>    | 2017 | Cochrane Database of Systematic Reviews | 6.8 | Medicine, General & Internal | Non-industry | 0/3            | 6   | 1995-2016 | Adults (18 years and over) with unprovoked venous thromboembolism                          | Warfarin, aspirin, rivaroxaban                                                                                                                                | Placebo                                                                                                                                                                                                                     |
| Romero <sup>80</sup>       | 2017 | Cochrane Database of Systematic Reviews | 6.8 | Medicine, General & Internal | Non-industry | 0/3            | 7   | 1983-1999 | Sexually active adults (16 years and over) with genital ulcers compatible with chancroid   | Macrolide antibiotics - 3 types                                                                                                                               | Other antibiotics - 4 types                                                                                                                                                                                                 |
| Rosomeck <sup>81</sup>     | 2018 | Cochrane Database of Systematic Reviews | 6.8 | Medicine, General & Internal | Non-industry | 0/3            | 15  | 1996-2016 | People with scabies of all ages and either sex                                             | Ivermectin                                                                                                                                                    | Permethrin                                                                                                                                                                                                                  |
| Rüschén <sup>82</sup>      | 2018 | Cochrane Database of Systematic Reviews | 6.8 | Medicine, General & Internal | Non-industry | 0/4            | 7   | 1995-2012 | Adults (18 years and over) undergoing intraocular surgery                                  | Hyaluronidase<br>Methylphenidate, modafinil, cholinesterase inhibitors (ChEIs), atypical antipsychotics, antidepressants, mibampator, valproate, semagacestat | Local anaesthetic mixture (standard treatment)                                                                                                                                                                              |
| Ruthirakuhan <sup>83</sup> | 2018 | Cochrane Database of Systematic Reviews | 6.8 | Medicine, General & Internal | Non-industry | 2/5            | 21  | 1998-2017 | People with Alzheimer's Disease                                                            |                                                                                                                                                               | Placebo                                                                                                                                                                                                                     |

|                                |      |                                                                                    |     |                              |              |                  |                 |           |                                                                                                                                                                                        |                                                                                                                                                                                                                                                                                           |                                                                                                 |
|--------------------------------|------|------------------------------------------------------------------------------------|-----|------------------------------|--------------|------------------|-----------------|-----------|----------------------------------------------------------------------------------------------------------------------------------------------------------------------------------------|-------------------------------------------------------------------------------------------------------------------------------------------------------------------------------------------------------------------------------------------------------------------------------------------|-------------------------------------------------------------------------------------------------|
| Sankar <sup>84</sup>           | 2018 | Cochrane Database of Systematic Reviews                                            | 6.8 | Medicine, General & Internal | No funding   | 0/3              | 6               | 2011-2016 | Preterm infants with retinopathy                                                                                                                                                       | Anti-vascular endothelial growth factor agents - 2 types<br>Levosimendan, dobutamine, enoximone, epinephrine, norepinephrine-dobutamine, amrinone, dopexamine, dopamine, nitric oxid                                                                                                      | Cryo/laser therapy                                                                              |
| Schumann <sup>85</sup>         | 2018 | Cochrane Database of Systematic Reviews                                            | 6.8 | Medicine, General & Internal | Non-industry | 3/9              | 13              | 1990-2013 | Adults (18 years and over) with cardiogenic shock or acute low cardiac output syndrome                                                                                                 | Acetazolamide, ibuprofen, dexamethasone, oxygen, nitric oxide, gabapentin, magnesium sulphate, sumatriptan                                                                                                                                                                                | Placebo, no treatment                                                                           |
| Simancas-Racines <sup>86</sup> | 2018 | Cochrane Database of Systematic Reviews<br>Cochrane Database of Systematic Reviews | 6.8 | Medicine, General & Internal | Non-industry | 0/6              | 13 <sup>k</sup> | 1992-1994 | People suffering from high altitude illness                                                                                                                                            | Salmeterol, tiotropium                                                                                                                                                                                                                                                                    | Placebo, normal air, unspecified control, paracetamol                                           |
| Smith <sup>87</sup>            | 2017 | Cochrane Database of Systematic Reviews                                            | 6.8 | Medicine, General & Internal | Non-industry | 0/2              | 4               | 1998-2015 | Adults and children with cystic fibrosis                                                                                                                                               | Intramuscular or intravenous opioids - 16 types<br>Alkaloids - 3 types, antidepressants - 3 types, levetiracetam, cyproheptadin, promethazine, buspiron, cognitive enhancers - 2 types, VMAT2 inhibitors, ethyleicosapentaenoic acid (ethyl-EPA), hormones - 3 types, lithium, ceruletide | No treatment, placebo<br>Placebo, no treatment, intramuscular or intravenous opioids - 16 types |
| Smith <sup>88</sup>            | 2018 | Cochrane Database of Systematic Reviews                                            | 6.8 | Medicine, General & Internal | Non-industry | 0/3              | 70              | 1958-2017 | Women in labour                                                                                                                                                                        | People with chronic psychiatric disorders<br>People with coronary disease, ischaemic cerebrovascular disease, peripheral arterial disease, or at high risk of atherothrombotic disease                                                                                                    | Placebo                                                                                         |
| Soares-Weiser <sup>89</sup>    | 2018 | Cochrane Database of Systematic Reviews                                            | 6.8 | Medicine, General & Internal | Non-industry | 0/5 <sup>l</sup> | 24 <sup>m</sup> | 1971-2014 | Adults with chronic psychiatric disorders<br>People with coronary disease, ischaemic cerebrovascular disease, peripheral arterial disease, or at high risk of atherothrombotic disease | Clopidrogel<br>Articaine, articaine + epinephrine, lidocaine + epinephrine, bupivacaine + epinephrine, mepivacaine + epinephrine, mepivacaine + levonordefrin,                                                                                                                            | Placebo, usual care (aspirin)                                                                   |
| Squizzato <sup>90</sup>        | 2017 | Cochrane Database of Systematic Reviews                                            | 6.8 | Medicine, General & Internal | Non-industry | 2/5              | 15              | 2001-2017 | Individuals undergoing dental procedures and volunteers who took part in simulated scenario studies                                                                                    |                                                                                                                                                                                                                                                                                           | Local anaesthetics                                                                              |
| St George <sup>91</sup>        | 2018 | Cochrane Database of Systematic Reviews                                            | 6.8 | Medicine, General & Internal | Non-industry | 1/7              | 123             | 1954-2017 |                                                                                                                                                                                        |                                                                                                                                                                                                                                                                                           |                                                                                                 |

|                             |      |                                         |     |                              |              |     |                  |           |                                                                                                                                                                  |                                                                                                                                                      |                                                                                                                                                                               |
|-----------------------------|------|-----------------------------------------|-----|------------------------------|--------------|-----|------------------|-----------|------------------------------------------------------------------------------------------------------------------------------------------------------------------|------------------------------------------------------------------------------------------------------------------------------------------------------|-------------------------------------------------------------------------------------------------------------------------------------------------------------------------------|
|                             |      |                                         |     |                              |              |     |                  |           |                                                                                                                                                                  | mepivacaine, prilocaine, prilocaine + felypressin, prilocaine + epinephrine                                                                          |                                                                                                                                                                               |
| Stern <sup>92</sup>         | 2017 | Cochrane Database of Systematic Reviews | 6.8 | Medicine, General & Internal | Non-industry | 0/6 | 17               | 1972-2015 | Adults and children with pneumonia<br>Children and adolescents (18 years or under) with autism spectrum disorder (ASD) or pervasive developmental disorder (PDD) | Corticosteroids - 7 types                                                                                                                            | Placebo, usual care                                                                                                                                                           |
| Sturman <sup>93</sup>       | 2017 | Cochrane Database of Systematic Reviews | 6.8 | Medicine, General & Internal | No funding   | 0/3 | 4                | 1995-2013 | Psychiatric patients with antipsychotic-induced tardive dyskinesia                                                                                               | Methylphenidate                                                                                                                                      | Placebo                                                                                                                                                                       |
| Tammenmaa-Aho <sup>94</sup> | 2018 | Cochrane Database of Systematic Reviews | 6.8 | Medicine, General & Internal | Non-industry | 0/4 | 14               | 1976-2014 | Adults (17 years and over) with severe mental illness and co-occurring substance use disorder                                                                    | Cholinergic drugs - 6 types                                                                                                                          | Placebo                                                                                                                                                                       |
| Temmingh <sup>95</sup>      | 2018 | Cochrane Database of Systematic Reviews | 6.8 | Medicine, General & Internal | Non-industry | 2/4 | 8                | 2006-2014 | Adults with HIV-associated cryptococcal meningitis                                                                                                               | Risperidone                                                                                                                                          | Other antipsychotics - 5 types                                                                                                                                                |
| Tenforde <sup>96</sup>      | 2018 | Cochrane Database of Systematic Reviews | 6.8 | Medicine, General & Internal | Non-industry | 1/7 | 13               | 1997-2018 |                                                                                                                                                                  | Antifungal induction therapies - 6 types                                                                                                             | Network meta-analysis<br>H2 receptor antagonists, proton pump inhibitors, prostaglandin analogues, anticholinergics, antacids, sucralfate, teprenone, naloxone, bioflavonoids |
| Toews <sup>97</sup>         | 2018 | Cochrane Database of Systematic Reviews | 6.8 | Medicine, General & Internal | Non-industry | 0/7 | 103 <sup>a</sup> | 1977-2016 | People admitted to intensive care units                                                                                                                          | H2 receptor antagonists, proton pump inhibitors, prostaglandin analogues, anticholinergics, antacids, sucralfate, teprenone, naloxone, bioflavonoids | placebo, no treatment, other medication (not defined)                                                                                                                         |
| Venekamp <sup>98</sup>      | 2018 | Cochrane Database of Systematic Reviews | 6.8 | Medicine, General & Internal | Non-industry | 1/4 | 3 <sup>a</sup>   | 1992-1996 | Children (16 years and under) with recurrent acute otitis media                                                                                                  | Antibiotics - 3 types                                                                                                                                | Grommets                                                                                                                                                                      |
| Vermeij <sup>99</sup>       | 2018 | Cochrane Database of Systematic Reviews | 6.8 | Medicine, General & Internal | Non-industry | 0/6 | 8                | 1998-2016 | Individuals who had an ischemic or hemorrhagic stroke                                                                                                            | Preventive antibiotics                                                                                                                               | Placebo, standard care                                                                                                                                                        |

|                                  |      |                                         |      |                              |              |      |     |                    |                                                                                                                                                           |                                                                                                           |                                                              |
|----------------------------------|------|-----------------------------------------|------|------------------------------|--------------|------|-----|--------------------|-----------------------------------------------------------------------------------------------------------------------------------------------------------|-----------------------------------------------------------------------------------------------------------|--------------------------------------------------------------|
| Vietto <sup>100</sup>            | 2018 | Cochrane Database of Systematic Reviews | 6.8  | Medicine, General & Internal | Non-industry | 0/6  | 33  | 1983- Unpublishe d | Patients with critical limb ischaemia unsuitable for rescue or reconstructive intervention                                                                | Prostanoids - 7 types                                                                                     | Placebo, other active drugs - 4 types                        |
| Wall <sup>101</sup>              | 2018 | Cochrane Database of Systematic Reviews | 6.8  | Medicine, General & Internal | Non-industry | 0/5  | 5   | 1995-2014          | Patients with acute bacterial meningitis<br>Adult patients (over 18 years) undergoing any elective or urgent surgical procedure under general anaesthesia | Glycerol                                                                                                  | Treatment as usual                                           |
| Weibel <sup>102</sup>            | 2018 | Cochrane Database of Systematic Reviews | 6.8  | Medicine, General & Internal | Non-industry | 3/10 | 68  | 1985-2017          | Adult patients with primary hypertension                                                                                                                  | Lidocaine<br>Thiazides, beta-blockers, angiotensin-converting-enzyme inhibitors, calcium channel blockers | Placebo, no treatment, thoracic epidural analgesia - 3 types |
| Wright <sup>103</sup>            | 2018 | Cochrane Database of Systematic Reviews | 6.8  | Medicine, General & Internal | Non-industry | 0/3  | 24  | 1966-2008          | Patients with focal epilepsy that failed to respond to one or more antiepileptic drugs                                                                    |                                                                                                           | Placebo                                                      |
| Xiao <sup>104</sup>              | 2018 | Cochrane Database of Systematic Reviews | 6.8  | Medicine, General & Internal | Non-industry | 0/4  | 2   | 2001-2003          | Adult and elder patients with solid tumours                                                                                                               | Losigamone                                                                                                | Placebo                                                      |
| Zhang <sup>105</sup>             | 2017 | Cochrane Database of Systematic Reviews | 6.8  | Medicine, General & Internal | No funding   | 0/5  | 3   | 2009-2015          | Adults (18 years and over) with neuropathic pain                                                                                                          | Thrombopoietin receptor agonists (TPO-RAs)                                                                | Placebo                                                      |
| Zhou <sup>106</sup>              | 2017 | Cochrane Database of Systematic Reviews | 6.8  | Medicine, General & Internal | Non-industry | 0/6  | 5   | 2004-2014          | Adult patients with an ischaemic stroke, haemorrhagic stroke or transient ischaemic attack                                                                | Oxcarbazepine                                                                                             | Placebo                                                      |
| Zonneveld <sup>107</sup>         | 2018 | Cochrane Database of Systematic Reviews | 6.8  | Medicine, General & Internal | Not reported | 0/7  | 11  | 1970-2017          |                                                                                                                                                           | Blood pressure-lowering drugs (BPLDs) - 5 types                                                           | Placebo, no treatment                                        |
| <b>General Medicine (n = 33)</b> |      |                                         |      |                              |              |      |     |                    |                                                                                                                                                           |                                                                                                           |                                                              |
| López-López <sup>108</sup>       | 2017 | BMJ                                     | 23.6 | Medicine, General & Internal | Non-industry | 0/8  | 23  | 1989-2014          | Adults with non-valvular atrial fibrillation                                                                                                              | Direct acting oral anticoagulants - 5 types, vitamin K antagonists, antiplatelet agents                   | Network Meta-analysis                                        |
| Wang <sup>109</sup>              | 2018 | BMJ Open                                | 2.4  | Medicine, General & Internal | Non-industry | 0/8  | 14  | 1977-2017          | Children and adults with uncomplicated skin abscesses                                                                                                     | Antibiotics - 10 types                                                                                    | No treatment, other antibiotics - Network meta-analysis      |
| Cipriani <sup>110</sup>          | 2018 | Lancet                                  | 53.3 | Medicine, General & Internal | Non-industry | 4/18 | 522 | 1979- Unpublishe d | Adults (18 years and over) with major depressive disorder                                                                                                 | Antidepressants - 21 types                                                                                | Placebo - Network meta-analysis                              |

|                      |      |          |     |                              |              |     |    |           |                                                                                                                                                      |                                                                                      |                                                   |
|----------------------|------|----------|-----|------------------------------|--------------|-----|----|-----------|------------------------------------------------------------------------------------------------------------------------------------------------------|--------------------------------------------------------------------------------------|---------------------------------------------------|
| Chen <sup>111</sup>  | 2018 | Medicine | 2.0 | Medicine, General & Internal | Non-industry | 0/3 | 9  | 2009-2017 | Patients with sepsis<br>Patients with hormone receptor-positive or human epidermal growth factor receptor 2 negative advanced breast cancer          | Statins - 3 types                                                                    | Placebo                                           |
| Ding <sup>112</sup>  | 2018 | Medicine | 2.0 | Medicine, General & Internal | No funding   | 0/6 | 6  | 2014-2017 | Adults undergoing total knee arthroplasty (TKA)                                                                                                      | Cyclin-dependent kinases 4/6 inhibitors - 3 types                                    | Placebo                                           |
| Guo <sup>113</sup>   | 2018 | Medicine | 2.0 | Medicine, General & Internal | Non-industry | 0/8 | 5  | 2004-2017 | Patients with myocardial infarction                                                                                                                  | Tranexamic acid (TXA)                                                                | Placebo, no treatment                             |
| Han <sup>114</sup>   | 2018 | Medicine | 2.0 | Medicine, General & Internal | Not reported | 0/7 | 18 | 2007-2016 | Patients with acute coronary syndrome, percutaneous coronary intervention, or coronary stents given combination therapy with aspirin and clopidogrel | Statins - 3 types                                                                    | Placebo                                           |
| Hu <sup>115</sup>    | 2018 | Medicine | 2.0 | Medicine, General & Internal | Not reported | 0/5 | 4  | 2010-2016 | Patients with pterygium or glaucoma                                                                                                                  | Proton pump inhibitors<br>Antivascular endothelial growth factor agents - 3 included | Placebo                                           |
| Huang <sup>116</sup> | 2018 | Medicine | 2.0 | Medicine, General & Internal | Not reported | 0/5 | 18 | 2010-2015 | Patients with diabetic peripheral neuropathy                                                                                                         | Fasudil + methylcobalamin or lipoic acid                                             | Methylcobalamin or lipoic acid alone              |
| Jiang <sup>117</sup> | 2018 | Medicine | 2.0 | Medicine, General & Internal | Non-industry | 0/5 | 13 | 2010-2017 | Adult women with pathologically confirmed epithelial ovarian cancer                                                                                  | Antiangiogenic therapy (7 included) alone or combined with chemotherapy              | Placebo or chemotherapy alone                     |
| Jiang <sup>118</sup> | 2018 | Medicine | 2.0 | Medicine, General & Internal | Non-industry | 0/4 | 15 | 2011-2016 | Patients with advanced non-small cell lung cancer                                                                                                    | Immune checkpoint inhibitors: anti-PD1/PD-L1 therapies - 3 types                     | Chemotherapy - 6 regimens                         |
| Khan <sup>119</sup>  | 2018 | Medicine | 2.0 | Medicine, General & Internal | Non-industry | 0/8 | 7  | 2015-2017 | Patients undergoing total knee or hip arthroplasty                                                                                                   | Acetaminophen                                                                        | Normal saline or placebo                          |
| Liang <sup>120</sup> | 2017 | Medicine | 2.0 | Medicine, General & Internal | No funding   | 0/4 | 3  | 2016-2017 | Adults with social anxiety disorder                                                                                                                  | Fluvoxamine                                                                          | Placebo                                           |
| Liu <sup>121</sup>   | 2018 | Medicine | 2.0 | Medicine, General & Internal | No funding   | 0/7 | 5  | 1999-2007 | Children and adults requiring nasogastric intubation                                                                                                 | Lidocaine                                                                            | Normal saline, K-Y lubricant gel, or no treatment |
| Lor <sup>122</sup>   | 2017 | Medicine | 2.0 | Medicine, General & Internal | No funding   | 0/8 | 10 | 1999-2015 | Adults with intertrochanteric fractures preparing for internal fixation                                                                              | Tranexamic acid                                                                      | Placebo, no treatment                             |
| Wang <sup>123</sup>  | 2017 | Medicine | 2.0 | Medicine, General & Internal | No funding   | 0/2 | 4  | 2015-2017 |                                                                                                                                                      |                                                                                      |                                                   |

|                      |      |          |     |                              |              |     |                 |           |                                                                                                |                                                                                                                                                                   |                                                                                    |
|----------------------|------|----------|-----|------------------------------|--------------|-----|-----------------|-----------|------------------------------------------------------------------------------------------------|-------------------------------------------------------------------------------------------------------------------------------------------------------------------|------------------------------------------------------------------------------------|
|                      |      |          |     |                              |              |     |                 |           | (dynamic hip screws, proximal femoral nail antirotations)                                      |                                                                                                                                                                   |                                                                                    |
| Wang <sup>124</sup>  | 2018 | Medicine | 2.0 | Medicine, General & Internal | No funding   | 0/5 | 18              | 2001-2016 | Patients with hepatorenal syndrome                                                             | Terlipressin                                                                                                                                                      | Placebo, octreotide, norepinephrine, dopamine + furosemide, octreotide + midodrine |
| Wang <sup>125</sup>  | 2018 | Medicine | 2.0 | Medicine, General & Internal | Not reported | 0/3 | 4               | 1993-2011 | Patients undergoing bronchoscopy                                                               | Propofol                                                                                                                                                          | Midazolam<br>Chemotherapy, everolimus, ipilimumab                                  |
| Wei <sup>126</sup>   | 2017 | Medicine | 2.0 | Medicine, General & Internal | Not reported | 0/2 | 14              | 2015-2017 | Cancer patients<br>Women of reproductive age with primary dysmenorrhea                         | PD-1 inhibitors - 2 types<br>Non-steroidal anti-inflammatory drugs, analgesics, oral contraceptives                                                               |                                                                                    |
| Woo <sup>127</sup>   | 2018 | Medicine | 2.0 | Medicine, General & Internal | Non-industry | 0/7 | 34 <sup>P</sup> | 1998-2017 | Patients who were administered xenon versus propofol as a general anesthetic                   | Xenon                                                                                                                                                             | Acupuncture                                                                        |
| Xia <sup>128</sup>   | 2018 | Medicine | 2.0 | Medicine, General & Internal | Non-industry | 0/6 | 13              | 2004-2012 | Patients prepared for primary total hip arthroplasty (THA)                                     |                                                                                                                                                                   | Propofol                                                                           |
| Yang <sup>129</sup>  | 2017 | Medicine | 2.0 | Medicine, General & Internal | Not reported | 0/4 | 7               | 2008-2016 | Patients undergoing laparoscopic cholecystectomy                                               | Glucocorticoids - 3 types                                                                                                                                         | Placebo, no treatment                                                              |
| Ye <sup>130</sup>    | 2017 | Medicine | 2.0 | Medicine, General & Internal | Not reported | 0/3 | 5               | 2004-2016 | Adults with acute heart failure                                                                | Ketamine                                                                                                                                                          | Placebo                                                                            |
| Yu <sup>131</sup>    | 2018 | Medicine | 2.0 | Medicine, General & Internal | No funding   | 0/6 | 8               | 2009-2017 | Patients with locoregionally advanced nasopharyngeal carcinoma                                 | Serelaxin                                                                                                                                                         | Placebo                                                                            |
| Yuan <sup>132</sup>  | 2018 | Medicine | 2.0 | Medicine, General & Internal | Non-industry | 0/9 | 31              | 1995-2016 |                                                                                                | Neoadjuvant chemotherapy regimens - 16 included Aspirin, aspirin + dipyridamole, aspirin + clopidogrel, aspirin + warfarin, cilostazol, warfarin, and ticlopidine | Network meta-analysis                                                              |
| Zhang <sup>133</sup> | 2018 | Medicine | 2.0 | Medicine, General & Internal | Not reported | 0/2 | 13              | 2001-2014 | Adults with cerebral infarction<br>Healthy volunteers and people with congestive heart failure |                                                                                                                                                                   | Placebo, other conventional therapy medicines - 3 types                            |
| Zhang <sup>134</sup> | 2018 | Medicine | 2.0 | Medicine, General & Internal | Non-industry | 0/8 | 10              | 1989-2006 | Adult patients prepared to undergo laparoscopic cholecystectomy                                | Histamine H2 antagonists - 5 types                                                                                                                                |                                                                                    |
| Zhao <sup>135</sup>  | 2018 | Medicine | 2.0 | Medicine, General & Internal | Not reported | 0/7 | 5               | 2008-2017 | Patients with a diagnosis of                                                                   | Lidocaine                                                                                                                                                         | Placebo, saline                                                                    |
| Zhao <sup>136</sup>  | 2018 | Medicine | 2.0 | Medicine, General & Internal | No funding   | 0/3 | 4               | 2013-2017 |                                                                                                | Nefopam                                                                                                                                                           | Saline or usual care                                                               |



|                      |      |                                         |     |                              |              |                |    |           |                                                                                                                                                                                   |                                                                                        |                                                                                                |
|----------------------|------|-----------------------------------------|-----|------------------------------|--------------|----------------|----|-----------|-----------------------------------------------------------------------------------------------------------------------------------------------------------------------------------|----------------------------------------------------------------------------------------|------------------------------------------------------------------------------------------------|
| Zhou <sup>137</sup>  | 2018 | Medicine                                | 2.0 | Medicine, General & Internal | No funding   | 0/4            | 6  | 2013-2017 | symptomatic cholelithiasis and acute cholecystitis who prepared for laparoscopic cholecystectomy<br>Adults with end-staged knee osteoarthritis undergoing total knee arthroplasty | Dexamethasone                                                                          | Placebo, no treatment                                                                          |
| Zhu <sup>138</sup>   | 2018 | Medicine Postgraduate                   | 2.0 | Medicine, General & Internal | Not reported | 0/3            | 8  | 2002-2016 | Patients who underwent total hip arthroplasty                                                                                                                                     | Selective non-steroidal anti-inflammatory drugs (selective COX-2 inhibitors) - 4 types | Non-selective non-steroidal anti-inflammatory drugs (non-selective COX-2 inhibitors) - 4 types |
| Zhou <sup>139</sup>  | 2018 | Medicine                                | 2.1 | Medicine, General & Internal | No funding   | 0/5            | 10 | 2007-2017 | Patients with dyslipidemia                                                                                                                                                        | Anacetrapib                                                                            | Placebo, placebo + usual care                                                                  |
| Zhang <sup>140</sup> | 2018 | Revista da Associação Médica Brasileira | 0.7 | Medicine, General & Internal | Non-industry | Not reported/6 | 6  | 2012-2016 | Patients with complicated intra-abdominal infections and complicated urinary tract infections                                                                                     | Ceftazidime-avibactam                                                                  | Other antibiotics - 3 types, usual care                                                        |

**Specialty medicine (n = 100)**

|                          |      |                                          |     |                                                                         |              |                |    |           |                                                                       |                                                                                                             |                                                                                               |
|--------------------------|------|------------------------------------------|-----|-------------------------------------------------------------------------|--------------|----------------|----|-----------|-----------------------------------------------------------------------|-------------------------------------------------------------------------------------------------------------|-----------------------------------------------------------------------------------------------|
| Li <sup>141</sup>        | 2018 | Acta Ophthalmologica                     | 3.3 | Ophthalmology                                                           | Non-industry | Not reported/3 | 72 | 1995-2015 | Patients with primary open-angle glaucoma or ocular hypertension      | Prostaglandin analogues, alpha-2 adrenergic agonists, beta-blockers, carbonic anhydrase inhibitors, miotics | Placebo - Network meta-analysis                                                               |
| Tarantini <sup>142</sup> | 2018 | American Heart Journal                   | 4.2 | Cardiac & Cardiovascular Systems                                        | No funding   | 0/7            | 5  | 2007-2016 | Patients with acute coronary syndrome                                 | P2Y12 receptor inhibitors - 2 types                                                                         | Clopidogrel                                                                                   |
| Wang <sup>143</sup>      | 2018 | American Journal of Cardiovascular Drugs | 2.7 | Cardiac & Cardiovascular Systems; Pharmacology & Pharmacy               | Non-industry | 0/3            | 5  | 2014-2017 | Adults aged 18–65 years with hyperlipidemia                           | Inclisiran                                                                                                  | Placebo, other lipid-lowering agents - Network meta-analysis                                  |
| Aman <sup>144</sup>      | 2018 | Anaesthesia and Intensive Care           | 1.7 | Anesthesiology; Critical Care Medicine                                  | Non-industry | Not reported/5 | 10 | 1995-2015 | Patients undergoing caesarean section under general anaesthesia       | Opioid analgesics - 3 types, non-opioid analgesics - 5 types                                                | Placebo                                                                                       |
| Li <sup>145</sup>        | 2018 | Autoimmunity Reviews                     | 8.7 | Immunology                                                              | Non-industry | 0/7            | 15 | 2004-2017 | Patients with rheumatoid arthritis                                    | Statins - 2 types                                                                                           | Conventional treatment, placebo + conventional treatment                                      |
| Wang <sup>146</sup>      | 2018 | Biomed Research International            | 2.6 | Biotechnology & Applied Microbiology; Medicine, Research & Experimental | Non-industry | 0/4            | 15 | 2006-2017 | Patients with left ventricular dysfunction undergoing cardiac surgery | Levosimendan                                                                                                | Placebo, milrinone, dopamine, intra-aortic balloon pump (IABP), and standard inotropic agents |

|                           |      |                               |     |                                     |              |     |                  |           |                                                                                                                                           |                                                                                                                                                                                                                                                                                                                                   |                                   |
|---------------------------|------|-------------------------------|-----|-------------------------------------|--------------|-----|------------------|-----------|-------------------------------------------------------------------------------------------------------------------------------------------|-----------------------------------------------------------------------------------------------------------------------------------------------------------------------------------------------------------------------------------------------------------------------------------------------------------------------------------|-----------------------------------|
| Veettil <sup>147</sup>    | 2017 | BMC Cancer                    | 3.3 | Oncology                            | No funding   | 0/6 | 8                | 2003-2014 | Adults with history of colorectal cancer or adenoma                                                                                       | Aspirin, non-aspirin nonsteroidal anti-inflammatory drugs (NSAIDs)<br>Purine-like xanthine oxidase inhibitors - 2 types, non-purine-like xanthine oxidase inhibitors - 2 types                                                                                                                                                    | Placebo, no treatment             |
| Bredemeier <sup>148</sup> | 2018 | BMC Cardiovascular Disorders  | 1.8 | Cardiac & Cardiovascular Systems    | No funding   | 0/9 | 91               | 1973-2017 | Adults under treatment for any clinical condition<br>Patients with post-endoscopic retrograde cholangiopancreatography pancreatitis (PEP) | Nonsteroidal anti-inflammatory drugs (NSAIDs) - 6 types                                                                                                                                                                                                                                                                           | Placebo, no treatment             |
| Lyu <sup>149</sup>        | 2018 | BMC Gastroenterology          | 2.7 | Gastroenterology & Hepatology       | Non-industry | 0/5 | 22               | 2003-2017 | Patients with invasive fungal infections                                                                                                  | Voriconazole                                                                                                                                                                                                                                                                                                                      | Placebo                           |
| Xing <sup>150</sup>       | 2017 | BMC Infectious Diseases       | 2.6 | Infectious Diseases                 | Non-industry | 0/6 | 16               | 2001-2016 | Patients undergoing total shoulder arthroplasty or reverse shoulder arthroplasty                                                          | Tranexamic acid<br>Pharmacological agents for traumatic brain injury – 14 types, pharmacological agents for stroke – 23 types, pharmacological agents for bacterial meningitis – 1 type, pharmacological agents for intracerebral haemorrhage – 6 types, pharmacological agents for aneurysmal subarachnoid hemorrhage – 19 types | Other antifungal agents - 7 types |
| Kuo <sup>151</sup>        | 2018 | BMC Musculoskeletal Disorders | 2.0 | Orthopedics; Rheumatology           | No funding   | 0/4 | 3                | 2015-2017 | Patients with ischemic or hemorrhagic stroke, traumatic brain injury, or bacterial meningitis                                             | Anti-fibrotic and anti-VEGF (vascular endothelial growth factor) medications - 3 types                                                                                                                                                                                                                                            | Placebo                           |
| Beez <sup>152</sup>       | 2017 | BMC Neurology                 | 2.2 | Clinical Neurology                  | No funding   | 0/3 | 110 <sup>a</sup> | 1983-2015 | Patients with primary or recurrent pterygium undergoing surgical removal combined with toxic agents                                       | Prasugrel                                                                                                                                                                                                                                                                                                                         | Unspecified control               |
| Zeng <sup>153</sup>       | 2017 | BMC Ophthalmology             | 1.8 | Ophthalmology                       | No funding   | 0/7 | 32               | 1990-2016 | Patients with acute coronary syndrome and patients who underwent percutaneous coronary intervention                                       | Ticagrelor                                                                                                                                                                                                                                                                                                                        | Placebo - Network meta-analysis   |
| Bundhun <sup>154</sup>    | 2017 | BMC Pharmacology & Toxicology | 1.9 | Pharmacology & Pharmacy; Toxicology | Non-industry | 0/3 | 4                | 2013-2016 |                                                                                                                                           |                                                                                                                                                                                                                                                                                                                                   |                                   |

|                               |       |                                                  |      |                                   |                           |      |    |           |                                                                                                              |                                                                                                        |                                                                                                                                                         |
|-------------------------------|-------|--------------------------------------------------|------|-----------------------------------|---------------------------|------|----|-----------|--------------------------------------------------------------------------------------------------------------|--------------------------------------------------------------------------------------------------------|---------------------------------------------------------------------------------------------------------------------------------------------------------|
| Zhang <sup>155</sup>          | 2017  | BMC Psychiatry                                   | 2.4  | Psychiatry                        | No funding                | 0/11 | 47 | 2003-2015 | People with schizophrenia or related disorders that had a duration of treatment that was no more than 1 year | Antipsychotic drugs - 12 types                                                                         | Placebo - Network meta-analysis                                                                                                                         |
| Zhang <sup>156</sup>          | 2017  | BMC Pulmonary Medicine                           | 2.7  | Respiratory System                | No funding                | 0/5  | 19 | 1996-2016 | Patients with acute exacerbations of chronic obstructive pulmonary disease (COPD)                            | Antibiotics - 17 types                                                                                 | Placebo - Network meta-analysis                                                                                                                         |
| Zhang <sup>157</sup>          | 2017b | BMC Pulmonary Medicine                           | 2.7  | Respiratory System                | Non-industry              | 0/4  | 25 | 1993-2016 | Preterm infants<br>Post-menopausal women with metastatic HR-positive, HER2-negative breast cancer            | Corticosteroids                                                                                        | Placebo                                                                                                                                                 |
| Ramos-Esquivel <sup>158</sup> | 2018  | Breast Cancer British Journal of Sports Medicine | 1.8  | Oncology; Obstetrics & Gynecology | No funding                | 0/4  | 3  | 2016-2017 | Patients with osteoarthritis in any joint                                                                    | Cyclin-dependent kinase 4/6 inhibitors - 3 types + aromatase inhibitor - 2 types                       | Aromatase inhibitors - 2 types                                                                                                                          |
| Zeng <sup>159</sup>           | 2018  | Sport Sciences                                   | 7.9  | Sport Sciences                    | Non-industry              | 0/12 | 36 | 1979-2016 |                                                                                                              | Non-steroidal anti-inflammatory drugs - 9 types                                                        | Network meta-analysis<br>FOLFOX (leucovorin + fluorouracil + oxaliplatin) + bevacizumab, FOLFIRI (leucovorin + fluorouracil + irinotecan) + bevacizumab |
| Shui <sup>160</sup>           | 2018  | Cellular Physiology and Biochemistry             | 5.5  | Cell Biology; Physiology          | Not reported              | 0/6  | 4  | 2015-2017 | Patients with metastatic colorectal cancer                                                                   | FOLFOXIRI (leucovorin + fluorouracil + oxaliplatin + irinotecan) + bevacizumab                         | Miltefosine, paromomycin, antimonial compounds - 2 types, pentamidine, sitamaquine                                                                      |
| Rodrigo <sup>161</sup>        | 2018  | Clinical Microbiology and Infection              | 5.4  | Infectious Diseases; Microbiology | No funding                | 0/4  | 28 | 1996-2017 | Patients with visceral leishmaniasis                                                                         | Amphotericin B                                                                                         | Placebo, nonsteroidal anti-inflammatory drugs (NSAIDs), disease modifying antirheumatic drugs (DMARDs)                                                  |
| Wang <sup>162</sup>           | 2018  | Clinical Rheumatology                            | 2.1  | Rheumatology                      | Non-industry              | 0/3  | 25 | 2002-2014 | Patients with ankylosing spondylitis and non-radiographic axial spondyloarthritis                            | Tumor necrosis factor (TNF) inhibitors - 5 types, non-tumor necrosis factor (TNF) inhibitors - 2 types | Low molecular-weight heparin (LMWH) – 5 types, enoxaparin + vitamin K antagonists (VKA)                                                                 |
| Hong <sup>163</sup>           | 2018  | Critical Reviews in Oncology / Hematology        | 4.5  | Oncology; Hematology              | No funding                | 1/5  | 13 | 1996-2015 | Adults with acute venous thromboembolism                                                                     | Proprotein convertase subtilisin/kexin type 9 gene inhibitors (PCSK9i)                                 | Rivaroxaban, unfractionated heparin (UFH)                                                                                                               |
| de Carvalho <sup>164</sup>    | 2018  | Diabetes Care                                    | 13.4 | Endocrinology & Metabolism        | Not reported <sup>f</sup> | 0/3  | 20 | 2012-2017 | Patients with familial or nonfamilial                                                                        |                                                                                                        | Placebo, placebo + other lipid-lowering therapy                                                                                                         |

|                            |      |                                                                |      |                                               |              |                  |    |           |                                                                                                                                                                                                   |                                                                                                 |                                                      |
|----------------------------|------|----------------------------------------------------------------|------|-----------------------------------------------|--------------|------------------|----|-----------|---------------------------------------------------------------------------------------------------------------------------------------------------------------------------------------------------|-------------------------------------------------------------------------------------------------|------------------------------------------------------|
| Jaafar <sup>165</sup>      | 2018 | Digestive Diseases and Sciences                                | 2.8  | Gastroenterology & Hepatology                 | Not reported | 0/5              | 17 | 2000-2016 | hypercholesterolemia<br>Adults (18 and over) with organic or functional dyspepsia                                                                                                                 | Rebamipide                                                                                      | Placebo, standard treatment, no treatment            |
| Liu <sup>166</sup>         | 2018 | Drug Delivery                                                  | 3.1  | Pharmacology & Pharmacy                       | Not reported | 0/2              | 9  | 2002-2015 | Patients with neurodegenerative movement disorders                                                                                                                                                | Riluzole                                                                                        | Placebo                                              |
| Liu <sup>167</sup>         | 2018 | Drug Design, Development and Therapy                           | 2.9  | Chemistry, Medicinal; Pharmacology & Pharmacy | Not reported | 0/5              | 9  | 2010-2016 | Patients undergoing coronary angiography (CAG) or percutaneous coronary intervention (PCI)                                                                                                        | Atorvastatin                                                                                    | Placebo                                              |
| Sun <sup>168</sup>         | 2017 | Drug Design, Development and Therapy                           | 2.9  | Chemistry, Medicinal; Pharmacology & Pharmacy | Not reported | 0/5              | 9  | 2009-2016 | Adults (≥ 18 years) undergoing spinal anesthesia                                                                                                                                                  | Dexmedetomidine                                                                                 | Fentanyl                                             |
| Paraschakis <sup>169</sup> | 2017 | East Asian Archives of Psychiatry Emergency Medicine           | None | Not applicable                                | Not reported | 0/2              | 4  | 2005-2010 | Adults with traumatic brain injuries and depressive disorders                                                                                                                                     | Antidepressants - 2 types                                                                       | Placebo                                              |
| D'Souza <sup>170</sup>     | 2018 | Journal                                                        | 2.0  | Emergency Medicine                            | No funding   | 0/8              | 4  | 2001-2016 | Patients taking acute antiemetic drugs                                                                                                                                                            | Diphenhydramine                                                                                 | Placebo                                              |
| Mei <sup>171</sup>         | 2016 | European Journal of Gynecological Oncology                     | 0.6  | Oncology; Obstetrics & Gynecology             | Not reported | Not reported/4   | 4  | 2004-2013 | Adult women with epithelial ovarian cancer, fallopian tube cancer, or primary peritoneal cancer who have achieved complete clinical remission after debulking surgery and first-line chemotherapy | CA125-targeted antibody – 2 types                                                               | Placebo                                              |
| Verberkt <sup>172</sup>    | 2017 | European Respiratory Journal Expert Opinion on Pharmacotherapy | 12.2 | Respiratory System                            | Non-industry | 3/9 <sup>s</sup> | 35 | 1982-2015 | Patients with chronic breathlessness                                                                                                                                                              | Opioids - 8 types                                                                               | Placebo                                              |
| Sridharan <sup>173</sup>   | 2018 | Expert Review of Clinical Pharmacology                         | 3.5  | Pharmacology & Pharmacy                       | No funding   | 0/3              | 51 | 1980-2016 | Critically ill patients receiving stress ulcer prophylaxis (SUP)                                                                                                                                  | Antacids, proton pump inhibitors (PPI), histamine-2 receptor antagonists (H2RA), and sucralfate | Placebo - Network meta-analysis                      |
| Habibi <sup>174</sup>      | 2018 | Pharmacology                                                   | 2.8  | Pharmacology & Pharmacy                       | No funding   | 0/4              | 5  | 1999-2012 | Patients undergoing coronary artery bypass surgery                                                                                                                                                | Lidocaine                                                                                       | Placebo                                              |
| Li <sup>175</sup>          | 2018 | Expert Review of Clinical Pharmacology                         | 2.8  | Pharmacology & Pharmacy                       | Non-industry | 0/4              | 14 | 2002-2017 | Patients with stable angina pectoris requiring elective percutaneous                                                                                                                              | Nicorandil                                                                                      | Placebo (saline, isosorbide dinitrate), no treatment |

|                                      |      |                                                                       |      |                                                                              |                  |                   |    |           |                                                                                                            |                                                                                                               |                                                                 |         |
|--------------------------------------|------|-----------------------------------------------------------------------|------|------------------------------------------------------------------------------|------------------|-------------------|----|-----------|------------------------------------------------------------------------------------------------------------|---------------------------------------------------------------------------------------------------------------|-----------------------------------------------------------------|---------|
| Sangroongruang<br>sri <sup>176</sup> | 2018 | Expert Review<br>of Clinical<br>Pharmacology                          | 2.8  | Pharmacology &<br>Pharmacy                                                   | Non-<br>industry | 0/5               | 11 | 2010-2017 | coronary<br>intervention (PCI)<br>Patients diagnosed<br>with retinal vein<br>occlusion                     | Anti-vascular endothelial<br>growth factor (VEGF)<br>drugs - 3 types                                          | Sham injection -<br>Network meta-analysis                       |         |
| Hickey <sup>177</sup>                | 2018 | Foot and Ankle<br>Surgery                                             | 1.5  | Orthopedics<br>Oncology;<br>Gastroenterology &<br>Hepatology                 | Not<br>reported  | 0/7               | 7  | 1993-2015 | Adult patients with<br>foot or ankle trauma<br>treated with below<br>knee cast or splint<br>immobilization | Low molecular weight<br>heparin - 5 types                                                                     | Placebo, no treatment                                           |         |
| Zhao <sup>178</sup>                  | 2018 | Gastric Cancer                                                        | 5.0  |                                                                              | Non-<br>industry | 0/9               | 16 | 2002-2017 | Patients with<br>advanced gastric<br>cancer                                                                | Targeted agents - 11 types,<br>targeted agents +<br>chemotherapy                                              | Placebo - Network<br>meta-analysis                              |         |
| Khera <sup>179</sup>                 | 2018 | Gastroenterolog<br>y                                                  | 20.8 | Gastroenterology &<br>Hepatology                                             | No<br>funding    | 0/9               | 29 | 1998-2015 | Obese and<br>overweight adults<br>(18 years and over)                                                      | Orlistat, loracaserin,<br>naltrexone-bupropion,<br>phentermine-topiramate,<br>liraglutide                     | Placebo - Network<br>meta-analysis                              |         |
| Li <sup>180</sup>                    | 2018 | Gynecologic<br>Oncology                                               | 4.5  | Oncology;<br>Obstetrics &<br>Gynecology<br>Gastroenterology &<br>Hepatology; | Non-<br>industry | 0/6               | 7  | 2005-2016 | Patients with low-<br>risk gestational<br>trophoblastic<br>neoplasia (LRGTN)                               | Methotrexate (MEX) based<br>chemotherapy regimens,<br>actinomycin-d (Act-D)<br>based chemotherapy<br>regimens | Network meta-analysis                                           |         |
| Zhuge <sup>181</sup>                 | 2018 | Helicobacter<br>Indian Journal<br>of Cancer                           | 4.1  | Microbiology                                                                 | Non-<br>industry | 0/6               | 18 | 1999-2016 | Patients with<br>helicobacter pylori<br>infection                                                          | Furazolidone                                                                                                  | Other antibiotics - 7<br>types                                  |         |
| Kim <sup>182</sup>                   | 2017 | Indian Journal<br>of Cancer                                           | 0.7  | Oncology                                                                     | No<br>funding    | 0/4               | 21 | 1993-2011 | Adults at risk of<br>developing cancer                                                                     | Statins - 7 types                                                                                             | Placebo                                                         |         |
| Garg <sup>183</sup>                  | 2018 | Indian Journal<br>of<br>Gastroenterolog<br>y                          | None | Not applicable                                                               | Not<br>reported  | 0/4               | 6  | 2007-2016 | Patients undergoing<br>endoscopic<br>retrograde<br>cholangiopancreatog<br>raphy                            | Immunosuppressed<br>haematology-<br>oncology patients                                                         | Indomethacin                                                    | Placebo |
| Rosanova <sup>184</sup>              | 2017 | Infectious<br>Diseases                                                | 1.9  | Infectious Diseases                                                          | Not<br>reported  | 0/5               | 7  | 2002-2011 | Adults (17 years and<br>over) diagnosed<br>with acute gout                                                 | Voriconazole                                                                                                  | Other antifungal<br>agents or placebo                           |         |
| Yu <sup>185</sup>                    | 2018 | Inflammopharm<br>acology                                              | 3.3  | Immunology;<br>Toxicology                                                    | Non-<br>industry | 0/6               | 3  | 2007-2016 | Patients with<br>chronic venous<br>disorders (CVD) or<br>venous edema                                      | Prednisolone                                                                                                  | Non-steroidal anti-<br>inflammatory drugs<br>(NSAIDs) - 2 types |         |
| Kakkos <sup>186</sup>                | 2018 | International<br>Angiology<br>International<br>Immunopharma<br>cology | 1.2  | Peripheral Vascular<br>Disease<br>Immunology;<br>Pharmacology &<br>Pharmacy  | Not<br>reported  | 2/2               | 7  | 1982-2015 | Adults with<br>moderate-to-severe<br>atopic dermatitis                                                     | Micronized purified<br>flavonoid faction (Daflon)                                                             | Placebo                                                         |         |
| Ou <sup>187</sup>                    | 2018 | International<br>Immunopharma<br>cology                               | 3.1  | Immunology;<br>Pharmacology &<br>Pharmacy                                    | No<br>funding    | Not<br>reported/5 | 8  | 2014-2017 | Children diagnosed<br>with recurrent<br>respiratory tract<br>infections (RRTIs)                            | Dupilumab                                                                                                     | Placebo                                                         |         |
| Yin <sup>188</sup>                   | 2018 | International<br>Immunopharma<br>cology                               | 3.1  | Immunology;<br>Pharmacology &<br>Pharmacy                                    | No<br>funding    | 0/4               | 53 | 1984-2017 |                                                                                                            | Broncho-Vaxom                                                                                                 | Placebo, routine<br>therapies                                   |         |

|                          |      |                                               |     |                                               |              |                |                |           |                                                                                           |                                                           |                                                                                                                               |
|--------------------------|------|-----------------------------------------------|-----|-----------------------------------------------|--------------|----------------|----------------|-----------|-------------------------------------------------------------------------------------------|-----------------------------------------------------------|-------------------------------------------------------------------------------------------------------------------------------|
| Zhu <sup>189</sup>       | 2018 | International Journal of Clinical Oncology    | 2.6 | Oncology                                      | Non-industry | 0/7            | 35             | 2005-2016 | Cancer patients                                                                           | Anti-EGFR monoclonal antibodies (EGFR-MoAbs)              | Placebo, usual care                                                                                                           |
| Liu <sup>190</sup>       | 2018 | International Journal of Neuroscience         | 1.8 | Neurosciences                                 | Not reported | 0/2            | 4              | 2007-2016 | Patients with seizures                                                                    | Lacosamide                                                | Placebo                                                                                                                       |
| Coccolini <sup>191</sup> | 2018 | International Journal of Surgery              | 2.7 | Surgery                                       | No funding   | 0/12           | 15             | 1993-2014 | Patients with advanced gastric and esophago-gastric cancer                                | Neoadjuvant chemotherapy (with surgery)                   | No neoadjuvant chemotherapy (only surgery)<br>Placebo, no treatment ("nothing controlled multimodal analgesia method")        |
| Fan <sup>192</sup>       | 2018 | International Journal of Surgery              | 2.7 | Surgery                                       | Non-industry | 0/8            | 7              | 2005-2016 | Patients with scheduled total knee arthroplasty                                           | Dexamethasone                                             | Patients with a diagnosis of symptomatic cholelithiasis and acute cholecystitis who prepared for laparoscopic cholecystectomy |
| Li <sup>193</sup>        | 2018 | International Journal of Surgery              | 2.7 | Surgery                                       | No funding   | 0/5            | 6              | 2008-2017 | Patients undergoing anaesthesia as part of endoscopic retrograde cholangiopancreatography | Lidocaine                                                 | Placebo, saline                                                                                                               |
| Li <sup>194</sup>        | 2018 | International Journal of Surgery              | 2.7 | Surgery                                       | No funding   | 0/4            | 17             | 1998-2017 | Patients undergoing total knee arthroplasty or total hip arthroplasty                     | Anaesthetic medications - 12 types                        | No drug - Network meta-analysis                                                                                               |
| Liu <sup>195</sup>       | 2018 | International Journal of Surgery              | 2.7 | Surgery                                       | Non-industry | 0/5            | 3 <sup>1</sup> | 2005-2017 | Patients with symptomatic knee osteoarthritis                                             | Tranexamic acid                                           | Aminocaproic acid                                                                                                             |
| Ran <sup>196</sup>       | 2018 | International Journal of Surgery              | 2.7 | Surgery                                       | No funding   | 0/5            | 5              | 2002-2016 | Patients with hepatocellular carcinoma                                                    | Hyaluronic acid                                           | Methylprednisolone                                                                                                            |
| Zhao <sup>197</sup>      | 2018 | International Journal of Surgery              | 2.7 | Surgery                                       | No funding   | 0/3            | 4 <sup>u</sup> | 2010-2017 | Adult patients prepared for laparoscopic cholecystectomy                                  | Anthracyclines                                            | Platinum                                                                                                                      |
| Zhu <sup>198</sup>       | 2018 | International Journal of Surgery              | 2.7 | Surgery                                       | Non-industry | 0/5            | 6              | 2004-2017 | Adults with major depressive disorder                                                     | Ketamine                                                  | Saline                                                                                                                        |
| Wagner <sup>199</sup>    | 2018 | Journal of Affective Disorders                | 3.8 | Clinical Neurology; Psychiatry                | Non-industry | Not reported/6 | 119            | 1990-2017 | Adults with major depressive disorder                                                     | Second generation antidepressants - 16 types              | Placebo - Network meta-analysis                                                                                               |
| Hickman <sup>200</sup>   | 2018 | Journal of Assisted Reproduction and Genetics | 2.8 | Genetics & Heredity; Obstetrics & Gynecology; | Not reported | 0/5            | 10             | 2007-2016 | Women with lymphoma, ovarian cancer, or breast                                            | Gonadotropin-releasing hormone agonists (GnRHa) - 7 types | Standard treatment (chemotherapy only)                                                                                        |

|                             |      |                                                  |     |                                                                        |                                           |              |                  |    |           |                                                                                                                                               |                                                                   |                                                                                                                                                                                                 |                                                                                       |
|-----------------------------|------|--------------------------------------------------|-----|------------------------------------------------------------------------|-------------------------------------------|--------------|------------------|----|-----------|-----------------------------------------------------------------------------------------------------------------------------------------------|-------------------------------------------------------------------|-------------------------------------------------------------------------------------------------------------------------------------------------------------------------------------------------|---------------------------------------------------------------------------------------|
| Luo <sup>201</sup>          | 2018 | Journal of Cancer Research and Clinical Oncology | 3.3 | Oncology                                                               | Reproductive Biology                      | Non-industry | 0/4              | 8  | 2015-2017 | cancer undergoing chemotherapy                                                                                                                | Patients with non-small-cell lung carcinoma                       | Programmed death 1 (PD-1)/programmed death ligand 1 (PD-L1) inhibitors - 3 types                                                                                                                | Chemotherapy - 2 types                                                                |
| Wang <sup>202</sup>         | 2018 | Journal of Cancer Research and Clinical Oncology | 3.3 | Oncology                                                               |                                           | Non-industry | 0/5              | 26 | 2010-2017 | Patients with metastatic castration-resistant prostate cancer                                                                                 |                                                                   | Targeted agents - 16 types                                                                                                                                                                      | Placebo - Network meta-analysis                                                       |
| Wang <sup>203</sup>         | 2018 | Journal of Cancer Research and Therapeutics      | 0.8 | Oncology                                                               |                                           | No funding   | 0/4              | 35 | 1997-2011 | Cancer patients with moderate to severe pain                                                                                                  | Adults (18 years and over) undergoing any type of cardiac surgery | Fentanyl                                                                                                                                                                                        | Morphine<br>Placebo,<br>discontinuation of aspirin greater than 7 days before surgery |
| Aboul-Hassan <sup>204</sup> | 2017 | Journal of Cardiac Surgery                       | 1.2 | Cardiac & Cardiovascular Systems; Surgery                              | Cardiac & Cardiovascular Systems; Surgery | No funding   | 0/8              | 12 | 1985-2016 |                                                                                                                                               |                                                                   | Aspirin                                                                                                                                                                                         |                                                                                       |
| Wang <sup>205</sup>         | 2018 | Journal of Cardiovascular Surgery                | 1.2 | Cardiac & Cardiovascular Systems; Surgery; Peripheral Vascular Disease |                                           | Not reported | 0/6              | 5  | 1999-2010 | Patients undergoing isolated coronary artery bypass graft (CABG) surgery                                                                      |                                                                   | Statins - 3 types<br>Antiandrogens, insulin sensitizers, estrogen-progestin oral contraceptives pills (OCPs), OCPs + antiandrogen, OCPs + insulin sensitizer, antiandrogen + insulin sensitizer | No preoperative statin                                                                |
| Barrionuevo <sup>206</sup>  | 2018 | Journal of Clinical Endocrinology and Metabolism | 5.8 | Endocrinology & Metabolism                                             |                                           | Non-industry | 0/8              | 32 | 1989-2016 | Women with hirsutism                                                                                                                          |                                                                   |                                                                                                                                                                                                 | Placebo - Network meta-analysis                                                       |
| Cui <sup>207</sup>          | 2018 | Journal of Clinical Pharmacy and Therapeutics    | 1.7 | Pharmacology & Pharmacy                                                |                                           | Not reported | 0/6              | 23 | 1993-2014 | Patients with type 2 diabetes                                                                                                                 | Adults with moderate-to-severe chronic plaque-type psoriasis      | Statins - 6 types                                                                                                                                                                               | Placebo - Network meta-analysis                                                       |
| Sawyer <sup>208</sup>       | 2018 | Journal of Dermatological Treatment              | 2.1 | Dermatology                                                            |                                           | Industry     | 6/6 <sup>v</sup> | 54 | 2001-2016 | Patients with onset of atrial fibrillation (AF) within 48 h, who were hemodynamically stable and without evidence of acute coronary syndrome, |                                                                   | Apremilast, biological therapies - 7 types                                                                                                                                                      | Placebo - Network meta-analysis                                                       |
| Markey <sup>209</sup>       | 2018 | Journal of Emergency Medicine                    | 1.2 | Emergency Medicine                                                     |                                           | Not reported | Not reported/3   | 11 | 1989-2004 |                                                                                                                                               |                                                                   | Flecainide                                                                                                                                                                                      | Placebo, verapamil, and other active anti-dysrhythmics                                |

|                            |      |                                                     |     |                                            |              |                   |                 |           |                                                                                                                                                                                                     |                                                                                          |                                                    |
|----------------------------|------|-----------------------------------------------------|-----|--------------------------------------------|--------------|-------------------|-----------------|-----------|-----------------------------------------------------------------------------------------------------------------------------------------------------------------------------------------------------|------------------------------------------------------------------------------------------|----------------------------------------------------|
| Szabó <sup>210</sup>       | 2017 | Journal of Gastrointestinal and Liver Diseases      | 2.0 | Gastroenterology & Hepatology              | Not reported | 0/15              | 10 <sup>w</sup> | 2009-2016 | congestive heart failure, or structural heart disease<br>Adult patients (18 years and over) taking low-dose aspirin for a minimum of 2 weeks<br>Patients with histologically confirmed solid cancer | Proton-pump inhibitors (PPIs) - 5 types                                                  | Histamine-2 receptor antagonists (H2RAs) - 2 types |
| Su <sup>211</sup>          | 2018 | Journal of Immunology Research                      | 3.3 | Immunology                                 | Non-industry | 0/6               | 15              | 2011-2017 | Patients with histologically confirmed solid cancer                                                                                                                                                 | Immune checkpoint inhibitors (ICIs) - 5 types                                            | Placebo or chemotherapy                            |
| Chen <sup>212</sup>        | 2018 | Journal of Interventional Cardiac Electrophysiology | 1.5 | Cardiac & Cardiovascular Systems           | Non-industry | 0/9               | 8               | 2006-2017 | Patients with persistent atrial fibrillation                                                                                                                                                        | Antiarrhythmic drugs                                                                     | Catheter ablation                                  |
| Chen <sup>213</sup>        | 2017 | Journal of Orthopaedic Surgery and Research         | 1.6 | Orthopedics                                | No funding   | 0/4               | 6               | 2008-2014 | Patients undergoing knee arthroscopy                                                                                                                                                                | Midazolam                                                                                | Placebo                                            |
| Li <sup>214</sup>          | 2018 | Journal of Orthopaedic Surgery and Research         | 1.6 | Orthopedics                                | Not reported | 0/5               | 3 <sup>x</sup>  | 2002-2017 | Patients undergoing a primary total hip or knee arthroplasty                                                                                                                                        | Aminocaproic acid                                                                        | Placebo or no treatment                            |
| Luo <sup>215</sup>         | 2018 | Journal of Orthopaedic Surgery and Research         | 1.6 | Orthopedics                                | Not reported | 0/4               | 3 <sup>y</sup>  | 2002-2017 | Patients treated with spine surgery                                                                                                                                                                 | Tranexamic acid                                                                          | Control (not specified)                            |
| Ma <sup>216</sup>          | 2018 | Journal of Orthopaedic Surgery and Research         | 1.6 | Orthopedics                                | No funding   | 0/4               | 4               | 1991-2015 | Patients who underwent hip surgery                                                                                                                                                                  | Naproxen                                                                                 | Placebo                                            |
| He <sup>217</sup>          | 2018 | Journal of Psychiatric Research                     | 4.0 | Psychiatry                                 | Non-industry | 0/8               | 22              | 2009-2015 | Patients with a primary diagnosis of major depressive disorder (MDD)                                                                                                                                | Vortioxetine, levomilnacipran, vilazodone                                                | Placebo                                            |
| Wang <sup>218</sup>        | 2018 | Journal of Stroke & Cerebrovascular Diseases        | 1.6 | Neurosciences; Peripheral Vascular Disease | Non-industry | 4/8               | 6               | 2003-2013 | Asian patients with non-valvular atrial fibrillation (AF)                                                                                                                                           | Warfarin, direct oral anticoagulants (DOACs) - 5 types                                   | Network meta-analysis                              |
| Dhana <sup>219</sup>       | 2018 | Journal of the American Academy of Dermatology      | 6.9 | Dermatology                                | No funding   | 0/6               | 15              | 2000-2016 | People with scabies                                                                                                                                                                                 | Permethrin<br>Proprotein convertase subtilisin/kexin type 9 (PCSK9) inhibitors - 2 types | Ivermectin                                         |
| Karatasakis <sup>220</sup> | 2017 | Journal of the American Heart Association           | 4.5 | Cardiac & Cardiovascular Systems           | Not reported | 3/12 <sup>z</sup> | 35              | 2012-2017 | Adults with hypercholesterolemia                                                                                                                                                                    | PCSK9 inhibitors - 2 types                                                               | Placebo, ezetimibe, standard therapy               |



|                          |      |                                                                |      |                                                                                                                                                |              |                 |                  |                                   |                                                                                                                                                  |                                                                     |                                                                    |
|--------------------------|------|----------------------------------------------------------------|------|------------------------------------------------------------------------------------------------------------------------------------------------|--------------|-----------------|------------------|-----------------------------------|--------------------------------------------------------------------------------------------------------------------------------------------------|---------------------------------------------------------------------|--------------------------------------------------------------------|
| Kuo <sup>221</sup>       | 2018 | Journal of the European Academy of Dermatology and Venereology | 4.3  | Dermatology                                                                                                                                    | Non-industry | 2/4             | 4                | 2012-2016                         | Adult patients (≥ 18) with moderate-to-severe plaque psoriasis                                                                                   | Tofacitinib                                                         | Placebo                                                            |
| Liu <sup>222</sup>       | 2016 | Journal of Traditional Chinese Medicine                        | 0.9  | Integrative & Complementary Medicine Biochemistry & Molecular Biology; Biotechnology & Applied Microbiology; Medicine, Research & Experimental | Non-industry | Not reported/6  | 16               | 2005-2015                         | Patients with rheumatoid arthritis                                                                                                               | Methotrexate                                                        | Sinomenine                                                         |
| Zheng <sup>223</sup>     | 2017 | Journal of Zhejiang University-SCIENCE B                       | 1.8  | Critical Care Medicine; Respiratory System                                                                                                     | Not reported | 0/7             | 8                | 1990-2014                         | Adult patients undergoing cardiac surgery requiring aortic cross-clamp<br>Patients with isoniazid-resistant, rifampicin-susceptible tuberculosis | Amiodarone, lidocaine<br>Fluoroquinolone, streptomycin              | Placebo<br>Usual care (REZ = rifampicin, ethambutol, pyrazinamide) |
| Fregonese <sup>224</sup> | 2018 | Lancet Respiratory Medicine                                    | 21.5 | Clinical Neurology; Neurosciences                                                                                                              | Non-industry | 0/57            | 2                | 2010-2014<br>2010-<br>Unpublished | Patients during early post-stroke period<br>Patients arranged for primary trabeculectomy                                                         | Cerebrolysin<br>Bevacizumab, bevacizumab + antimetabolite - 2 types | Placebo<br>Placebo, antimetabolite - 2 types                       |
| Bornstein <sup>225</sup> | 2018 | Neurological Research                                          | 2.3  | Clinical Neurology                                                                                                                             | No funding   | Not reported/10 | 9                | 2013-2015                         | Patients undergoing spinal surgery                                                                                                               | Gabapentin                                                          | Placebo                                                            |
| Chen <sup>226</sup>      | 2018 | Ophthalmic Research                                            | 1.8  | Anesthesiology; Clinical Neurology                                                                                                             | No funding   | 0/4             | 3                | 2004-2016                         | Adult patients undergoing surgical procedures                                                                                                    | Dexmedetomidine + opioids                                           | Opioids                                                            |
| Han <sup>227</sup>       | 2017 | Pain Physician                                                 | 2.6  | Chemistry, Medicinal; Chemistry, Multidisciplinary; Pharmacology & Pharmacy                                                                    | Not reported | 0/5             | 18               | 2004-2016                         | Patients with tuberculosis                                                                                                                       | V-5 immunitor                                                       | Usual care (chemotherapy), usual care + placebo                    |
| Peng <sup>228</sup>      | 2017 | Pain Physician                                                 | 2.6  | Chemistry, Medicinal; Chemistry, Multidisciplinary; Pharmacology & Pharmacy                                                                    | Not reported | 0/7             | 2 <sup>aa</sup>  | 2011-2012                         | Patients with non-cystic fibrosis bronchiectasis                                                                                                 | Antibiotics - 7 types                                               | Placebo, symptomatic treatment only                                |
| Feng <sup>229</sup>      | 2016 | Pharmazie                                                      | 1.0  | Parasitology; Tropical Medicine                                                                                                                | Not reported | Not reported/8  | 12               | 1999-2014                         | Patients infected with soil transmitted helminths                                                                                                | Albendazole + ivermectin                                            | Albendazole, ivermectin                                            |
| Xu <sup>230</sup>        | 2016 | Pharmazie PLOS Neglected Tropical Diseases                     | 1.0  |                                                                                                                                                | Non-industry | 0/9             | 14 <sup>bb</sup> | 1997-2015                         |                                                                                                                                                  |                                                                     |                                                                    |
| Palmeirim <sup>231</sup> | 2018 |                                                                | 4.4  |                                                                                                                                                |              |                 |                  |                                   |                                                                                                                                                  |                                                                     |                                                                    |

|                            |      |                                                                 |      |                                                 |              |      |    |           |                                                                                                                                                                                                       |                                                                                                                                                                            |                                                                   |
|----------------------------|------|-----------------------------------------------------------------|------|-------------------------------------------------|--------------|------|----|-----------|-------------------------------------------------------------------------------------------------------------------------------------------------------------------------------------------------------|----------------------------------------------------------------------------------------------------------------------------------------------------------------------------|-------------------------------------------------------------------|
| Furukawa <sup>232</sup>    | 2018 | Psychotherapy and Psychosomatics                                | 13.1 | Psychiatry; Psychology                          | Non-industry | 2/11 | 3  | 2000-2015 | Adults with persistent depressive disorder (DSM-5), chronic major depression, recurrent major depression with incomplete interepisode recovery or dysthymia (DSM-IV), or any corresponding conditions | Antidepressants - 6 types, cognitive-behavioral analysis system of psychotherapy, combination of antidepressants and cognitive-behavioral analysis system of psychotherapy | Network meta-analysis                                             |
| Liu <sup>233</sup>         | 2018 | Renal Failure                                                   | 1.4  | Urology & Nephrology                            | Not reported | 0/6  | 12 | 2006-2015 | Adult patients with chronic kidney disease                                                                                                                                                            | Uric acid-lowering therapy - 2 types                                                                                                                                       | Placebo, usual therapy, no treatment                              |
| Miravittles <sup>234</sup> | 2017 | Respiratory Research                                            | 3.8  | Respiratory System                              | Industry     | 3/4  | 10 | 2014-2016 | Adults with a history of chronic obstructive pulmonary disease (COPD)                                                                                                                                 | Tiotropium + olodaterol                                                                                                                                                    | Tiotropium or olodaterol as monotherapy, salmeterol + fluticasone |
| Wang <sup>235</sup>        | 2017 | Respiratory Research                                            | 3.8  | Respiratory System                              | Non-industry | 1/7  | 6  | 2006-2016 | Patients with intermittent or mild persistent asthma                                                                                                                                                  | Corticosteroids, fast-onset-acting $\beta$ -agonists                                                                                                                       | Corticosteroid + fast-onset-acting $\beta$ -agonist               |
| Kawalec <sup>236</sup>     | 2018 | Rheumatology International                                      | 2.0  | Rheumatology                                    | No funding   | 0/4  | 8  | 2011-2016 | Adults (18 years and over) with moderate to severe psoriatic arthritis (PsA)                                                                                                                          | Tumor necrosis factor (antiTNF)- $\alpha$ inhibitors - 4 types                                                                                                             | Placebo - Network meta-analysis                                   |
| Malhotra <sup>237</sup>    | 2018 | Stroke Surgical Laparoscopy Endoscopy & Percutaneous Techniques | 6.2  | Clinical Neurology; Peripheral Vascular Disease | Not reported | 0/6  | 12 | 2009-2016 | Adult patients (18 years and over) treated for the secondary prevention of cardiovascular, peripheral vascular, and cerebrovascular disease                                                           | Proton pump inhibitors (PPI) + thienopyridines                                                                                                                             | Thienopyridines - 2 types                                         |
| Zhang <sup>238</sup>       | 2018 | Surgery                                                         | 1.0  | Surgery                                         | Not reported | 0/3  | 5  | 1995-2018 | Adults (18 and over) undergoing gastrointestinal endoscopy                                                                                                                                            | Midazolam                                                                                                                                                                  | Propofol                                                          |
| Yamashita <sup>239</sup>   | 2018 | Thrombosis Research                                             | 2.8  | Hematology; Peripheral Vascular Disease         | No funding   | 3/7  | 6  | 2009-2014 | Asian and non-Asian adults (18 years and older) with acute venous thromboembolism                                                                                                                     | Direct oral anticoagulants (DOACs) - 4 types                                                                                                                               | Vitamin K antagonists (VKAs), heparin                             |
| Zhang <sup>240</sup>       | 2018 | Vaccine                                                         | 3.3  | Immunology; Medicine, Research & Experimental   | No funding   | 1/6  | 13 | 1999-2014 | HIV-positive people                                                                                                                                                                                   | Influenza vaccine, Placebo                                                                                                                                                 | Network meta-analysis                                             |

| Multidisciplinary sciences (n = 10) |      |                         |     |                                   |              |                |                  |           |                                                                                                                    |                                   |                                                                            |
|-------------------------------------|------|-------------------------|-----|-----------------------------------|--------------|----------------|------------------|-----------|--------------------------------------------------------------------------------------------------------------------|-----------------------------------|----------------------------------------------------------------------------|
| Chen <sup>241</sup>                 | 2018 | Medical Science Monitor | 1.9 | Medicine, Research & Experimental | Non-industry | 0/5            | 20 <sup>cc</sup> | 2000-2016 | Patients with essential hypertension Adult patients (over 18 years old) that underwent the extraction of any tooth | Anti-hypertensive drugs - 8 types | Acupuncture                                                                |
| Arteagoitia <sup>242</sup>          | 2018 | PLOS ONE                | 2.8 | Multidisciplinary Sciences        | No funding   | 0/3            | 8                | 1989-2015 | Adults with osteoarthritis or rheumatoid arthritis of the knee or hip                                              | Chlorhexidine                     | Placebo, standard treatment                                                |
| Feng <sup>243</sup>                 | 2018 | PLOS ONE                | 2.8 | Multidisciplinary Sciences        | No funding   | 0/4            | 9                | 2002-2009 | Pediatric surgical patients                                                                                        | Etoricoxib                        | Placebo, other non-steroidal anti-inflammatory drugs (NSAIDs) - 2 included |
| Kawakami <sup>244</sup>             | 2018 | PLOS ONE                | 2.8 | Multidisciplinary Sciences        | Non-industry | 0/5            | 6                | 2007-2017 | Adults (18 years and over) diagnosed with generalized anxiety disorder (GAD)                                       | Magnesium                         | Placebo, no treatment                                                      |
| Li <sup>245</sup>                   | 2018 | PLOS ONE                | 2.8 | Multidisciplinary Sciences        | Non-industry | 0/7            | 8                | 2007-2014 | Patients with hypertension and chronic kidney disease stage 3 to 5 and dialysis                                    | Duloxetine                        | Placebo                                                                    |
| Lin <sup>246</sup>                  | 2017 | PLOS ONE                | 2.8 | Multidisciplinary Sciences        | Non-industry | 0/6            | 21               | 1992-2012 | Adults (19 years and over) undergoing cardiac surgery                                                              | Calcium channel blockers          | Angiotensin-converting enzyme inhibitors, angiotensin receptor blockers    |
| Ling <sup>247</sup>                 | 2018 | PLOS ONE                | 2.8 | Multidisciplinary Sciences        | Non-industry | Not reported/6 | 9                | 2003-2017 | Cancer patients                                                                                                    | Dexmedetomidine                   | Propofol, morphine, placebo                                                |
| Rohner <sup>248</sup>               | 2017 | PLOS ONE                | 2.8 | Multidisciplinary Sciences        | Non-industry | 2/7            | 94               | 1993-2014 | Post renal transplant patients                                                                                     | Erythropoiesis-stimulating agents | Usual care                                                                 |
| Sethi <sup>249</sup>                | 2018 | PLOS ONE                | 2.8 | Multidisciplinary Sciences        | No funding   | 0/6            | 28               | 1986-2017 | Patients with atrial fibrillation or atrial flutter                                                                | Digoxin                           | Placebo, no intervention, beta blockers, calcium antagonists, amiodarone   |
| Wolf <sup>250</sup>                 | 2018 | PLOS ONE                | 2.8 | Multidisciplinary Sciences        | Industry     | 1/9            | 13               | 2002-2016 | Patients with atrial fibrillation or atrial flutter                                                                | mTOR-inhibitors - 2 types         | Calcineurin-inhibitors                                                     |

<sup>a</sup>Only 3 studies reported that authors were employed by industry and therefore we included them as ties for the purposes of this table; <sup>b</sup>11/12 included RCTs had a drug arm; <sup>c</sup>33/38 included RCTs had a drug arm; <sup>d</sup>4/14 included RCTs had a drug arm; <sup>e</sup>One author reported pharmaceutical company employment; <sup>f</sup>9/11 included RCTs had a drug arm; <sup>g</sup>71/120 included studies were RCTs; <sup>h</sup>24/25 included studies were RCTs; <sup>i</sup>Meta-analysis funding sources reported as 'None, Other' we coded as no study funding; <sup>j</sup>10/27 included RCTs had a drug arm; <sup>k</sup>Flow chart indicates that 0 RCTs were included in the quantitative synthesis, but 2 RCTs were quantitatively synthesized and 13 were included; <sup>l</sup>Declarations of interest were provided for only 3 out of 5 meta-analysis authors; <sup>m</sup>24/31 included RCTs had a drug arm; <sup>n</sup>103/106 included RCTs had a drug arm; <sup>o</sup>3/5 included RCTs had a drug arm; <sup>p</sup>34/60 included RCTs had a drug arm; <sup>q</sup>110/123 included RCTs had an eligible drug arm; <sup>r</sup>Salary was reported under 'funding' but they did not specify whether there was any funding for the study itself; <sup>s</sup>ICMJE forms only provided for 5/9 authors; <sup>t</sup>3/4 included studies were RCTs; <sup>u</sup>4/11 included studies were RCTs; <sup>v</sup>Four authors reported financial ties with a pharmaceutical company and employment by Symmetron, a company that provides health economic research services to pharmaceutical companies, and two authors reported employment by a pharmaceutical company; <sup>w</sup>10/12 included studies were RCTs; <sup>x</sup>3/7 included studies were RCTs; <sup>y</sup>3/4 included studies were RCTs; <sup>z</sup>Of the 3 authors that reported financial ties, one also reported industry employment; <sup>aa</sup>2/4 included studies were RCTs; <sup>bb</sup>14/30 included studies were RCTs; <sup>cc</sup>20/30 included studies were RCTs with a drug arm

eTable2. – Detailed reporting of study funding sources (F), author-industry financial ties (T), and author-industry employment (E) from included RCTs

| First Author                      | Year | Journal                                 | Funding Sources of Included Trials Reported in Meta-analysis? | Author-Industry Financial Ties of Included Trials Reported in Meta-analysis? | Author-Industry Employment of Included Trials Reported in Meta-analysis? | Location Reported |                              |                                    |                                                                                           |          |             |                 |
|-----------------------------------|------|-----------------------------------------|---------------------------------------------------------------|------------------------------------------------------------------------------|--------------------------------------------------------------------------|-------------------|------------------------------|------------------------------------|-------------------------------------------------------------------------------------------|----------|-------------|-----------------|
|                                   |      |                                         |                                                               |                                                                              |                                                                          | Risk of Bias Text | Risk of Bias Figure or Table | Main Text, Other than Risk of Bias | Other in Main Document (Characteristics of Included Studies Table, other table, footnote) | Abstract | Lay summary | Online appendix |
| <b>Cochrane Reviews (n = 107)</b> |      |                                         |                                                               |                                                                              |                                                                          |                   |                              |                                    |                                                                                           |          |             |                 |
| Abdel-Rahman <sup>1</sup>         | 2018 | Cochrane Database of Systematic Reviews | Full                                                          | No                                                                           | No                                                                       | F                 | F                            |                                    | F                                                                                         | F        | F           |                 |
| Adams <sup>2</sup>                | 2018 | Cochrane Database of Systematic Reviews | Full                                                          | No                                                                           | No                                                                       | F                 |                              | F                                  | F                                                                                         |          |             |                 |
| Agabio <sup>3</sup>               | 2018 | Cochrane Database of Systematic Reviews | Full                                                          | Partial                                                                      | No                                                                       |                   |                              | F, T                               | F, T                                                                                      |          | F           |                 |
| Al-Shahi Salman <sup>4</sup>      | 2018 | Cochrane Database of Systematic Reviews | Partial                                                       | No                                                                           | No                                                                       |                   |                              | F                                  | F                                                                                         |          |             |                 |
| Alabed <sup>5</sup>               | 2018 | Cochrane Database of Systematic Reviews | Partial                                                       | No                                                                           | Partial                                                                  |                   |                              |                                    | F, E                                                                                      |          |             |                 |
| Allegretti <sup>6</sup>           | 2017 | Cochrane Database of Systematic Reviews | Full                                                          | No                                                                           | No                                                                       | F                 | F                            |                                    |                                                                                           | F        | F           |                 |
| Arechabala <sup>7</sup>           | 2018 | Cochrane Database of Systematic Reviews | Full                                                          | Partial                                                                      | Partial                                                                  | F                 | F, E                         | F, T                               | F, T, E                                                                                   |          | F           |                 |
| Baandrup <sup>8</sup>             | 2018 | Cochrane Database of Systematic Reviews | Full                                                          | Full                                                                         | Partial                                                                  | F                 | F                            | F                                  | F, T, E                                                                                   |          | F           |                 |
| Bala <sup>9</sup>                 | 2018 | Cochrane Database of Systematic Reviews | Full                                                          | No                                                                           | No                                                                       | F                 |                              |                                    | F                                                                                         |          |             |                 |
| Barbato <sup>10</sup>             | 2018 | Cochrane Database of Systematic Reviews | No                                                            | No                                                                           | No                                                                       |                   |                              |                                    |                                                                                           |          |             |                 |
| Bergman <sup>11</sup>             | 2018 | Cochrane Database of Systematic Reviews | Full                                                          | Partial                                                                      | No                                                                       |                   |                              |                                    | F, T                                                                                      |          |             |                 |
| Bighelli <sup>12</sup>            | 2018 | Cochrane Database of Systematic Reviews | Full                                                          | Full                                                                         | Partial                                                                  | F                 | F, T, E                      | F                                  | F, T, E                                                                                   | F        | F           |                 |
| Birks <sup>13</sup>               | 2018 | Cochrane Database of Systematic Reviews | Full                                                          | Partial                                                                      | No                                                                       |                   |                              | F                                  | F, T                                                                                      | F        |             |                 |
| Boyapati <sup>14</sup>            | 2018 | Cochrane Database of Systematic Reviews | No                                                            | No                                                                           | No                                                                       |                   |                              |                                    |                                                                                           |          |             |                 |
| Brown <sup>15</sup>               | 2018 | Cochrane Database of Systematic Reviews | Partial                                                       | Partial                                                                      | No                                                                       | F                 | F                            | F                                  | F, T                                                                                      | F        | F           |                 |
| Bruins Slot <sup>16</sup>         | 2018 | Cochrane Database of Systematic Reviews | Full                                                          | No                                                                           | No                                                                       |                   |                              |                                    | F                                                                                         |          |             |                 |
| Bryan <sup>17</sup>               | 2017 | Cochrane Database of Systematic Reviews | Partial                                                       | No                                                                           | No                                                                       |                   |                              |                                    | F                                                                                         |          |             |                 |

|                              |      |                                         |                      |                      |         |      |      |   |         |
|------------------------------|------|-----------------------------------------|----------------------|----------------------|---------|------|------|---|---------|
| Bryant-Smith <sup>18</sup>   | 2018 | Cochrane Database of Systematic Reviews | Full                 | No                   | No      |      |      |   | F       |
| Burry <sup>19</sup>          | 2018 | Cochrane Database of Systematic Reviews | Full                 | No                   | No      | F    | F    |   | F       |
| Campschroer <sup>20</sup>    | 2018 | Cochrane Database of Systematic Reviews | Full                 | Full                 | No      |      |      |   | F, T    |
| Candy <sup>21</sup>          | 2018 | Cochrane Database of Systematic Reviews | Full                 | No                   | No      |      | F    |   | F       |
| Chiew <sup>22</sup>          | 2018 | Cochrane Database of Systematic Reviews | No                   | No                   | No      |      |      |   |         |
| Das <sup>23</sup>            | 2018 | Cochrane Database of Systematic Reviews | Full                 | No                   | No      |      | F    | F | F       |
| Demicheli <sup>24</sup>      | 2018 | Cochrane Database of Systematic Reviews | Full <sup>a</sup>    | Partial              | Partial |      |      |   | F, T, E |
| Demicheli <sup>25</sup>      | 2018 | Cochrane Database of Systematic Reviews | No                   | No                   | No      |      |      |   |         |
| Di Nisio <sup>26</sup>       | 2018 | Cochrane Database of Systematic Reviews | Partial              | Partial              | No      |      |      |   | F, T    |
| El-Sayeh <sup>27</sup>       | 2018 | Cochrane Database of Systematic Reviews | Full                 | No                   | No      | F    |      |   | F       |
| Engelen <sup>28</sup>        | 2018 | Cochrane Database of Systematic Reviews | No                   | No                   | No      |      |      |   |         |
| Eshun-Wilson <sup>29</sup>   | 2018 | Cochrane Database of Systematic Reviews | Full                 | Full                 | No      |      |      |   | F, T    |
| Essali <sup>30</sup>         | 2018 | Cochrane Database of Systematic Reviews | Full                 | No                   | No      |      |      |   | F       |
| Everitt <sup>31</sup>        | 2018 | Cochrane Database of Systematic Reviews | Partial              | Partial              | No      | F, T | F, T | F | F, T    |
| Fanshawe <sup>32</sup>       | 2017 | Cochrane Database of Systematic Reviews | No                   | No                   | No      |      |      |   |         |
| Franik <sup>33</sup>         | 2018 | Cochrane Database of Systematic Reviews | Full                 | Partial              | No      |      |      |   | F, T    |
| González <sup>34</sup>       | 2018 | Cochrane Database of Systematic Reviews | Full                 | No                   | No      |      |      |   | F       |
| Grabosch <sup>35</sup>       | 2018 | Cochrane Database of Systematic Reviews | No                   | No                   | No      |      |      |   |         |
| Graves <sup>36</sup>         | 2018 | Cochrane Database of Systematic Reviews | Partial <sup>b</sup> | No                   | No      |      |      |   | F       |
| Haas <sup>37</sup>           | 2018 | Cochrane Database of Systematic Reviews | Full                 | Full                 | No      |      | F, T |   | F, T    |
| Hakoum <sup>38</sup>         | 2018 | Cochrane Database of Systematic Reviews | Full                 | Full                 | No      |      |      |   | F, T    |
| Heras-Mosteiro <sup>39</sup> | 2017 | Cochrane Database of Systematic Reviews | Partial <sup>c</sup> | Partial <sup>d</sup> | Partial |      |      |   | F, T, E |
| Janmaat <sup>40</sup>        | 2017 | Cochrane Database of Systematic Reviews | No                   | No                   | No      |      |      |   |         |
| Jefferson <sup>41</sup>      | 2018 | Cochrane Database of Systematic Reviews | Full                 | No                   | No      |      |      |   | F       |
| Jung <sup>42</sup>           | 2017 | Cochrane Database of Systematic Reviews | Full                 | Full                 | Partial |      | F, T |   | F, T, E |

|                           |      |                                         |                      |         |                      |      |      |      |         |   |
|---------------------------|------|-----------------------------------------|----------------------|---------|----------------------|------|------|------|---------|---|
| Kaempfen <sup>43</sup>    | 2018 | Cochrane Database of Systematic Reviews | No                   | No      | No                   |      |      |      |         |   |
| Kahale <sup>44</sup>      | 2017 | Cochrane Database of Systematic Reviews | Full                 | Full    | Partial <sup>6</sup> |      |      |      | F, T, E |   |
| Kahale <sup>45</sup>      | 2018 | Cochrane Database of Systematic Reviews | Full                 | Partial | No                   |      |      |      | F, T    |   |
| Kahale <sup>46</sup>      | 2018 | Cochrane Database of Systematic Reviews | Full                 | Partial | No                   |      |      |      | F, T    |   |
| Kapur <sup>47</sup>       | 2018 | Cochrane Database of Systematic Reviews | Full                 | No      | No                   |      |      |      | F       |   |
| Kelly <sup>48</sup>       | 2018 | Cochrane Database of Systematic Reviews | Partial <sup>7</sup> | Partial | No                   |      | F    |      | F, T    |   |
| Knighly <sup>49</sup>     | 2017 | Cochrane Database of Systematic Reviews | Full                 | No      | No                   |      |      |      | F       |   |
| Kopsaftis <sup>50</sup>   | 2018 | Cochrane Database of Systematic Reviews | No                   | No      | No                   |      |      |      |         |   |
| Lawrie <sup>51</sup>      | 2018 | Cochrane Database of Systematic Reviews | Full                 | Partial | Partial              |      |      |      | F, T, E |   |
| Leathersich <sup>52</sup> | 2018 | Cochrane Database of Systematic Reviews | Full                 | Full    | No                   | F, T | F, T | F, T | F, T    |   |
| Lethaby <sup>53</sup>     | 2017 | Cochrane Database of Systematic Reviews | Full                 | No      | No                   |      |      | F    | F       | F |
| López-Briz <sup>54</sup>  | 2018 | Cochrane Database of Systematic Reviews | Full                 | No      | No                   |      |      |      | F       |   |
| Marchant <sup>55</sup>    | 2018 | Cochrane Database of Systematic Reviews | Partial              | No      | No                   |      |      |      | F       |   |
| Matar <sup>56</sup>       | 2018 | Cochrane Database of Systematic Reviews | Full                 | No      | No                   |      | F    |      |         |   |
| Matar <sup>57</sup>       | 2018 | Cochrane Database of Systematic Reviews | Full                 | Full    | No                   |      |      |      | F, T    |   |
| McNicol <sup>58</sup>     | 2018 | Cochrane Database of Systematic Reviews | Full                 | No      | No                   |      |      |      | F       |   |
| McTague <sup>59</sup>     | 2018 | Cochrane Database of Systematic Reviews | No                   | No      | No                   |      |      |      |         |   |
| Mhaskar <sup>60</sup>     | 2017 | Cochrane Database of Systematic Reviews | Full                 | Full    | Partial              |      |      |      | F, T, E |   |
| Milligan <sup>61</sup>    | 2018 | Cochrane Database of Systematic Reviews | Partial <sup>8</sup> | No      | No                   | F    | F    |      |         |   |
| Monk <sup>62</sup>        | 2017 | Cochrane Database of Systematic Reviews | Full                 | Full    | No                   |      |      | F, T | F, T    |   |
| Montero <sup>63</sup>     | 2018 | Cochrane Database of Systematic Reviews | Partial              | No      | No                   |      | F    |      |         |   |
| Mücke <sup>64</sup>       | 2018 | Cochrane Database of Systematic Reviews | Full                 | Full    | Partial              |      |      | F, T | F, T, E |   |
| Narula <sup>65</sup>      | 2018 | Cochrane Database of Systematic Reviews | No                   | No      | No                   |      |      |      |         |   |
| Nevitt <sup>66</sup>      | 2017 | Cochrane Database of Systematic Reviews | Partial              | No      | No                   |      |      | F    | F       |   |
| Nevitt <sup>67</sup>      | 2018 | Cochrane Database of Systematic Reviews | Full                 | No      | No                   |      |      |      | F       |   |

|                                |      |                                         |         |                      |         |         |         |      |         |      |   |
|--------------------------------|------|-----------------------------------------|---------|----------------------|---------|---------|---------|------|---------|------|---|
| Norman <sup>68</sup>           | 2018 | Cochrane Database of Systematic Reviews | Full    | No                   | Partial |         |         | F    | F, E    |      |   |
| Normansell <sup>69</sup>       | 2018 | Cochrane Database of Systematic Reviews | Full    | No <sup>h</sup>      | No      |         |         | F    | F       |      |   |
| Novoa <sup>70</sup>            | 2018 | Cochrane Database of Systematic Reviews | Full    | Partial <sup>h</sup> | No      | F       | F       |      | F, T    | F    | F |
| Ohlsson <sup>71</sup>          | 2017 | Cochrane Database of Systematic Reviews | Partial | No                   | No      |         |         | F    | F       |      |   |
| Ostinelli <sup>72</sup>        | 2018 | Cochrane Database of Systematic Reviews | Full    | No                   | No      |         |         | F    | F       |      |   |
| Ostinelli <sup>73</sup>        | 2018 | Cochrane Database of Systematic Reviews | Partial | Partial              | No      | F       | F, T    | F    |         |      |   |
| Ostuzzi <sup>74</sup>          | 2018 | Cochrane Database of Systematic Reviews | Full    | Partial              | No      | F       | F, T    | F    |         |      |   |
| Parker <sup>75</sup>           | 2018 | Cochrane Database of Systematic Reviews | No      | No                   | No      |         |         |      |         |      |   |
| Pasquali <sup>76</sup>         | 2018 | Cochrane Database of Systematic Reviews | Partial | Partial              | No      | F, T    | F, T    | F    |         | F    | F |
| Pike <sup>77</sup>             | 2018 | Cochrane Database of Systematic Reviews | Full    | No                   | No      |         |         | F    | F       |      |   |
| Rirash <sup>78</sup>           | 2017 | Cochrane Database of Systematic Reviews | No      | No                   | No      |         |         |      |         |      |   |
| Robertson <sup>79</sup>        | 2017 | Cochrane Database of Systematic Reviews | No      | No                   | No      |         |         |      |         |      |   |
| Romero <sup>80</sup>           | 2017 | Cochrane Database of Systematic Reviews | Full    | No                   | No      | F       | F       | F    | F       | F    | F |
| Rosumeck <sup>81</sup>         | 2018 | Cochrane Database of Systematic Reviews | Full    | Full                 | No      |         |         |      | F, T    |      |   |
| Rüschén <sup>82</sup>          | 2018 | Cochrane Database of Systematic Reviews | Full    | Full                 | No      |         |         | F, T | F, T    |      |   |
| Ruthirakuhan <sup>83</sup>     | 2018 | Cochrane Database of Systematic Reviews | Full    | No                   | Partial |         |         | F    | F, E    |      |   |
| Sankar <sup>84</sup>           | 2018 | Cochrane Database of Systematic Reviews | No      | No                   | No      |         |         |      |         |      |   |
| Schumann <sup>85</sup>         | 2018 | Cochrane Database of Systematic Reviews | Full    | Partial              | Partial | F, T    |         | F    | F, T, E | F, T | F |
| Simancas-Racines <sup>86</sup> | 2018 | Cochrane Database of Systematic Reviews | Full    | Full                 | No      | F       | F       | F    | F, T    |      |   |
| Smith <sup>87</sup>            | 2017 | Cochrane Database of Systematic Reviews | Full    | Full                 | Full    | F, T, E | F, T, E |      |         |      |   |
| Smith <sup>88</sup>            | 2018 | Cochrane Database of Systematic Reviews | Full    | Full                 | No      |         |         | F, T | F, T    |      |   |
| Soares-Weiser <sup>89</sup>    | 2018 | Cochrane Database of Systematic Reviews | Partial | No                   | No      |         |         |      | F       |      |   |
| Squizzato <sup>90</sup>        | 2017 | Cochrane Database of Systematic Reviews | Full    | Partial <sup>i</sup> | No      | F       | F, T    | F    |         | F    |   |
| St George <sup>91</sup>        | 2018 | Cochrane Database of Systematic Reviews | Full    | Partial              | Partial | F, T    | F, T, E | F    | F, T, E |      |   |
| Stern <sup>92</sup>            | 2017 | Cochrane Database of Systematic Reviews | Full    | No                   | No      |         |         | F    | F       |      | F |

|                                  |      |                                         |                      |         |         |      |         |         |      |   |
|----------------------------------|------|-----------------------------------------|----------------------|---------|---------|------|---------|---------|------|---|
| Sturman <sup>93</sup>            | 2017 | Cochrane Database of Systematic Reviews | Full                 | Full    | No      | F, T | F, T    | F, T    |      |   |
| Tammenmaa-Aho <sup>94</sup>      | 2018 | Cochrane Database of Systematic Reviews | Partial              | No      | No      |      |         |         | F    |   |
| Temmingh <sup>95</sup>           | 2018 | Cochrane Database of Systematic Reviews | Full                 | Partial | Partial | F, T | F, T, E | F, T, E | F, T |   |
| Tenforde <sup>96</sup>           | 2018 | Cochrane Database of Systematic Reviews | Full                 | Full    | No      | F, T | F, T    |         | F, T |   |
| Toews <sup>97</sup>              | 2018 | Cochrane Database of Systematic Reviews | Full                 | Full    | Partial |      | F, E    | F       | F, T |   |
| Venekamp <sup>98</sup>           | 2018 | Cochrane Database of Systematic Reviews | Full                 | Full    | No      |      |         | F       | F, T |   |
| Vermeij <sup>99</sup>            | 2018 | Cochrane Database of Systematic Reviews | No                   | No      | No      |      |         |         |      |   |
| Vietto <sup>100</sup>            | 2018 | Cochrane Database of Systematic Reviews | Full                 | No      | No      |      |         |         | F    | F |
| Wall <sup>101</sup>              | 2018 | Cochrane Database of Systematic Reviews | Full                 | Full    | No      | F, T | F       | F       | F    |   |
| Weibel <sup>102</sup>            | 2018 | Cochrane Database of Systematic Reviews | Full                 | No      | No      |      |         | F       | F    |   |
| Wright <sup>103</sup>            | 2018 | Cochrane Database of Systematic Reviews | Partial              | Partial | No      | F    | F, T    |         |      |   |
| Xiao <sup>104</sup>              | 2018 | Cochrane Database of Systematic Reviews | Full                 | No      | No      |      |         |         | F    |   |
| Zhang <sup>105</sup>             | 2017 | Cochrane Database of Systematic Reviews | Full                 | No      | No      | F    | F       | F       | F    | F |
| Zhou <sup>106</sup>              | 2017 | Cochrane Database of Systematic Reviews | Full                 | Full    | No      |      |         | F       | F, T | F |
| Zonneveld <sup>107</sup>         | 2018 | Cochrane Database of Systematic Reviews | Partial <sup>l</sup> | No      | No      |      | F       |         |      |   |
| <b>General Medicine (n = 33)</b> |      |                                         |                      |         |         |      |         |         |      |   |
| López-López <sup>108</sup>       | 2017 | BMJ                                     | Full                 | No      | No      |      |         | F       |      | F |
| Wang <sup>109</sup>              | 2018 | BMJ Open                                | No                   | No      | No      |      |         |         |      |   |
| Cipriani <sup>110</sup>          | 2018 | Lancet                                  | Full <sup>k</sup>    | No      | No      |      |         | F       |      | F |
| Chen <sup>111</sup>              | 2018 | Medicine                                | No                   | No      | No      |      |         |         |      |   |
| Ding <sup>112</sup>              | 2018 | Medicine                                | No                   | No      | No      |      |         |         |      |   |
| Guo <sup>113</sup>               | 2018 | Medicine                                | No                   | No      | No      |      |         |         |      |   |
| Han <sup>114</sup>               | 2018 | Medicine                                | No                   | No      | No      |      |         |         |      |   |
| Hu <sup>115</sup>                | 2018 | Medicine                                | No                   | No      | No      |      |         |         |      |   |
| Huang <sup>116</sup>             | 2018 | Medicine                                | Full                 | Partial | No      | F, T |         |         |      |   |
| Jiang <sup>117</sup>             | 2018 | Medicine                                | No                   | No      | No      |      |         |         |      |   |
| Jiang <sup>118</sup>             | 2018 | Medicine                                | No                   | No      | No      |      |         |         |      |   |
| Khan <sup>119</sup>              | 2018 | Medicine                                | No                   | No      | No      |      |         |         |      |   |
| Liang <sup>120</sup>             | 2017 | Medicine                                | No                   | No      | No      |      |         |         |      |   |
| Liu <sup>121</sup>               | 2018 | Medicine                                | Partial <sup>l</sup> | No      | No      |      |         | F       |      |   |
| Lor <sup>122</sup>               | 2017 | Medicine                                | No                   | No      | No      |      |         |         |      |   |
| Wang <sup>123</sup>              | 2017 | Medicine                                | No                   | No      | No      |      |         |         |      |   |
| Wang <sup>124</sup>              | 2018 | Medicine                                | No                   | No      | No      |      |         |         |      |   |
| Wang <sup>125</sup>              | 2018 | Medicine                                | No                   | No      | No      |      |         |         |      |   |
| Wei <sup>126</sup>               | 2017 | Medicine                                | No                   | No      | No      |      |         |         |      |   |



|                                     |      |                                                                     |                      |                   |    |      |   |
|-------------------------------------|------|---------------------------------------------------------------------|----------------------|-------------------|----|------|---|
| Woo <sup>127</sup>                  | 2018 | Medicine                                                            | No                   | No                | No |      |   |
| Xia <sup>128</sup>                  | 2018 | Medicine                                                            | No                   | No                | No |      |   |
| Yang <sup>129</sup>                 | 2017 | Medicine                                                            | No                   | No                | No |      |   |
| Ye <sup>130</sup>                   | 2017 | Medicine                                                            | No                   | No                | No |      |   |
| Yu <sup>131</sup>                   | 2018 | Medicine                                                            | No                   | No                | No |      |   |
| Yuan <sup>132</sup>                 | 2018 | Medicine                                                            | No                   | No                | No |      |   |
| Zhang <sup>133</sup>                | 2018 | Medicine                                                            | No                   | No                | No |      |   |
| Zhang <sup>134</sup>                | 2018 | Medicine                                                            | No                   | No                | No |      |   |
| Zhao <sup>135</sup>                 | 2018 | Medicine                                                            | No                   | No                | No |      |   |
| Zhao <sup>136</sup>                 | 2018 | Medicine                                                            | No                   | No                | No |      |   |
| Zhou <sup>137</sup>                 | 2018 | Medicine                                                            | No                   | No                | No |      |   |
| Zhu <sup>138</sup>                  | 2018 | Medicine                                                            | No                   | No                | No |      |   |
| Zhou <sup>139</sup>                 | 2018 | Postgraduate Medicine<br>Revista da Associação<br>Médica Brasileira | No                   | No                | No |      |   |
| Zhang <sup>140</sup>                | 2018 | Médica Brasileira                                                   | Full                 | Full <sup>m</sup> | No | F, T |   |
| <b>Specialty medicine (n = 100)</b> |      |                                                                     |                      |                   |    |      |   |
| Li <sup>141</sup>                   | 2018 | Acta Ophthalmologica<br>American Heart<br>Journal                   | Full <sup>n</sup>    | No                | No | F    | F |
| Tarantini <sup>142</sup>            | 2018 | American Journal of<br>Cardiovascular Drugs                         | No                   | No                | No |      |   |
| Wang <sup>143</sup>                 | 2018 | Anaesthesia and<br>Intensive Care                                   | No                   | No                | No |      |   |
| Aman <sup>144</sup>                 | 2018 | Autoimmunity<br>Reviews                                             | No                   | No                | No |      |   |
| Li <sup>145</sup>                   | 2018 | Biomed Research<br>International                                    | No                   | No                | No |      |   |
| Wang <sup>146</sup>                 | 2018 | BMC Cancer                                                          | No                   | No                | No |      |   |
| Veetil <sup>147</sup>               | 2017 | BMC Cardiovascular<br>Disorders                                     | No                   | No                | No |      |   |
| Bredemeier <sup>148</sup>           | 2018 | BMC<br>Gastroenterology                                             | Full                 | No                | No |      | F |
| Lyu <sup>149</sup>                  | 2018 | BMC Infectious<br>Diseases                                          | No                   | No                | No |      |   |
| Xing <sup>150</sup>                 | 2017 | BMC Musculoskeletal<br>Disorders                                    | No                   | No                | No |      |   |
| Kuo <sup>151</sup>                  | 2018 | BMC Neurology                                                       | No                   | No                | No |      |   |
| Beez <sup>152</sup>                 | 2017 | BMC Ophthalmology                                                   | No                   | No                | No |      |   |
| Zeng <sup>153</sup>                 | 2017 | BMC Pharmacology &<br>Toxicology                                    | No                   | No                | No |      |   |
| Bundhun <sup>154</sup>              | 2017 | BMC Psychiatry                                                      | No                   | No                | No |      |   |
| Zhang <sup>155</sup>                | 2017 | BMC Pulmonary<br>Medicine                                           | No                   | No                | No |      |   |
| Zhang <sup>156</sup>                | 2017 | BMC Pulmonary<br>Medicine                                           | No                   | No                | No |      |   |
| Zhang <sup>157</sup>                | 2017 | Medicine                                                            | Full                 | No                | No |      |   |
| Ramos-Esquivel <sup>158</sup>       | 2018 | Breast Cancer<br>British Journal of<br>Sports Medicine              | No                   | No                | No |      |   |
| Zeng <sup>159</sup>                 | 2018 |                                                                     | Partial <sup>o</sup> | No                | No | F    | F |

|                                 |      |                                            |                      |    |    |   |   |
|---------------------------------|------|--------------------------------------------|----------------------|----|----|---|---|
| Shui <sup>160</sup>             | 2018 | Cellular Physiology and Biochemistry       | No                   | No | No |   |   |
| Rodrigo <sup>161</sup>          | 2018 | Clinical Microbiology and Infection        | Partial              | No | No |   | F |
| Wang <sup>162</sup>             | 2018 | Clinical Rheumatology                      | No                   | No | No |   |   |
| Hong <sup>163</sup>             | 2018 | Critical Reviews in Hematology             | No                   | No | No |   |   |
| de Carvalho <sup>164</sup>      | 2018 | Diabetes Care                              | No                   | No | No |   |   |
| Jaafar <sup>165</sup>           | 2018 | Digestive Diseases and Sciences            | No                   | No | No |   |   |
| Liu <sup>166</sup>              | 2018 | Drug Delivery                              | No                   | No | No |   |   |
| Liu <sup>167</sup>              | 2018 | Drug Design, Development and Therapy       | No                   | No | No |   |   |
| Sun <sup>168</sup>              | 2017 | Drug Design, Development and Therapy       | No                   | No | No |   |   |
| Paraschakis <sup>169</sup>      | 2017 | East Asian Archives of Psychiatry          | No                   | No | No |   |   |
| D'Souza <sup>170</sup>          | 2018 | Emergency Medicine Journal                 | No                   | No | No |   |   |
| Mei <sup>171</sup>              | 2016 | European Journal of Gynecological Oncology | No                   | No | No |   |   |
| Verberkt <sup>172</sup>         | 2017 | European Respiratory Journal               | No                   | No | No |   |   |
| Sridharan <sup>173</sup>        | 2018 | Expert Opinion on Pharmacotherapy          | No                   | No | No |   |   |
| Habibi <sup>174</sup>           | 2018 | Expert Review of Clinical Pharmacology     | No                   | No | No |   |   |
| Li <sup>175</sup>               | 2018 | Expert Review of Clinical Pharmacology     | No                   | No | No |   |   |
| Sangroongruangsi <sup>176</sup> | 2018 | Expert Review of Clinical Pharmacology     | Full                 | No | No |   | F |
| Hickey <sup>177</sup>           | 2018 | Foot and Ankle Surgery                     | No                   | No | No |   |   |
| Zhao <sup>178</sup>             | 2018 | Gastric Cancer                             | Partial <sup>P</sup> | No | No | F | F |
| Khera <sup>179</sup>            | 2018 | Gastroenterology                           | No                   | No | No |   |   |
| Li <sup>180</sup>               | 2018 | Gynecologic Oncology                       | No                   | No | No |   |   |
| Zhuge <sup>181</sup>            | 2018 | Helicobacter                               | No                   | No | No |   |   |
| Kim <sup>182</sup>              | 2017 | Indian Journal of Cancer                   | No                   | No | No |   |   |
| Garg <sup>183</sup>             | 2018 | Indian Journal of Gastroenterology         | No                   | No | No |   |   |
| Rosanova <sup>184</sup>         | 2017 | Infectious Diseases                        | No                   | No | No |   |   |
| Yu <sup>185</sup>               | 2018 | Inflammopharmacology                       | No                   | No | No |   |   |

|                             |      |                                                        |                      |    |    |   |   |
|-----------------------------|------|--------------------------------------------------------|----------------------|----|----|---|---|
| Kakkos <sup>186</sup>       | 2018 | International<br>Angiology                             | No                   | No | No |   |   |
| Ou <sup>187</sup>           | 2018 | International<br>Immunopharmacology                    | Full                 | No | No |   | F |
| Yin <sup>188</sup>          | 2018 | International<br>Immunopharmacology                    | No                   | No | No |   |   |
| Zhu <sup>189</sup>          | 2018 | International Journal<br>of Clinical Oncology          | No                   | No | No |   |   |
| Liu <sup>190</sup>          | 2018 | International Journal<br>of Neuroscience               | No                   | No | No |   |   |
| Coccolini <sup>191</sup>    | 2018 | International Journal<br>of Surgery                    | No                   | No | No |   |   |
| Fan <sup>192</sup>          | 2018 | International Journal<br>of Surgery                    | No                   | No | No |   |   |
| Li <sup>193</sup>           | 2018 | International Journal<br>of Surgery                    | No                   | No | No |   |   |
| Li <sup>194</sup>           | 2018 | International Journal<br>of Surgery                    | No                   | No | No |   |   |
| Liu <sup>195</sup>          | 2018 | International Journal<br>of Surgery                    | No                   | No | No |   |   |
| Ran <sup>196</sup>          | 2018 | International Journal<br>of Surgery                    | No <sup>q</sup>      | No | No |   |   |
| Zhao <sup>197</sup>         | 2018 | International Journal<br>of Surgery                    | No                   | No | No |   |   |
| Zhu <sup>198</sup>          | 2018 | International Journal<br>of Surgery                    | No                   | No | No |   |   |
| Wagner <sup>199</sup>       | 2018 | Journal of Affective<br>Disorders                      | Partial              | No | No |   | F |
| Hickman <sup>200</sup>      | 2018 | Journal of Assisted<br>Reproduction and<br>Genetics    | No                   | No | No |   |   |
| Luo <sup>201</sup>          | 2018 | Journal of Cancer<br>Research and Clinical<br>Oncology | No                   | No | No |   |   |
| Wang <sup>202</sup>         | 2018 | Journal of Cancer<br>Research and Clinical<br>Oncology | Partial <sup>r</sup> | No | No | F | F |
| Wang <sup>203</sup>         | 2018 | Journal of Cancer<br>Research and<br>Therapeutics      | No                   | No | No |   |   |
| Aboul-Hassan <sup>204</sup> | 2017 | Journal of Cardiac<br>Surgery                          | No                   | No | No |   |   |
| Wang <sup>205</sup>         | 2018 | Journal of<br>Cardiovascular<br>Surgery                | No                   | No | No |   | F |
| Barrionuevo <sup>206</sup>  | 2018 | Journal of Clinical<br>Endocrinology and<br>Metabolism | Full                 | No | No | F |   |

|                            |      |                                                                |       |    |    |   |
|----------------------------|------|----------------------------------------------------------------|-------|----|----|---|
| Cui <sup>207</sup>         | 2018 | Journal of Clinical Pharmacy and Therapeutics                  | Full* | No | No | F |
| Sawyer <sup>208</sup>      | 2018 | Journal of Dermatological Treatment                            | No    | No | No |   |
| Markey <sup>209</sup>      | 2018 | Journal of Emergency Medicine                                  | No    | No | No |   |
| Szabó <sup>210</sup>       | 2017 | Journal of Gastrointestinal and Liver Diseases                 | No    | No | No |   |
| Su <sup>211</sup>          | 2018 | Journal of Immunology Research                                 | No    | No | No |   |
| Chen <sup>212</sup>        | 2018 | Journal of Interventional Cardiac Electrophysiology            | No    | No | No |   |
| Chen <sup>213</sup>        | 2017 | Journal of Orthopaedic Surgery and Research                    | No    | No | No |   |
| Li <sup>214</sup>          | 2018 | Journal of Orthopaedic Surgery and Research                    | No    | No | No |   |
| Luo <sup>215</sup>         | 2018 | Journal of Orthopaedic Surgery and Research                    | No    | No | No |   |
| Ma <sup>216</sup>          | 2018 | Journal of Orthopaedic Surgery and Research                    | No    | No | No |   |
| He <sup>217</sup>          | 2018 | Journal of Psychiatric Research                                | Full  | No | No | F |
| Wang <sup>218</sup>        | 2018 | Journal of Stroke & Cerebrovascular Diseases                   | No    | No | No |   |
| Dhana <sup>219</sup>       | 2018 | Journal of the American Academy of Dermatology                 | No    | No | No |   |
| Karatasakis <sup>220</sup> | 2017 | Journal of the American Heart Association                      | No    | No | No |   |
| Kuo <sup>221</sup>         | 2018 | Journal of the European Academy of Dermatology and Venereology | Full  | No | No |   |
| Liu <sup>222</sup>         | 2016 | Journal of Traditional Chinese Medicine                        | No    | No | No |   |
| Zheng <sup>223</sup>       | 2017 | Journal of Zhejiang University-SCIENCE B                       | No    | No | No |   |
| Fregonese <sup>224</sup>   | 2018 | Lancet Respiratory Medicine                                    | No    | No | No |   |
| Bornstein <sup>225</sup>   | 2018 | Journal of Neurological Sciences                               | No    | No | No |   |
| Chen <sup>226</sup>        | 2018 | Ophthalmic Research                                            | No    | No | No |   |
| Han <sup>227</sup>         | 2017 | Pain Physician                                                 | No    | No | No |   |
| Peng <sup>228</sup>        | 2017 | Pain Physician                                                 | No    | No | No |   |

|                            |      |                                                          |         |    |         |   |
|----------------------------|------|----------------------------------------------------------|---------|----|---------|---|
| Feng <sup>229</sup>        | 2016 | Pharmazie                                                | No      | No | No      |   |
| Xu <sup>230</sup>          | 2016 | Pharmazie                                                | No      | No | No      |   |
| Palmeirim <sup>231</sup>   | 2018 | PLOS Neglected Tropical Diseases                         | No      | No | No      |   |
| Furukawa <sup>232</sup>    | 2018 | Psychotherapy and Psychosomatics                         | No      | No | No      |   |
| Liu <sup>233</sup>         | 2018 | Renal Failure                                            | No      | No | No      |   |
| Miravittles <sup>234</sup> | 2017 | Respiratory Research                                     | Full    | No | No      | F |
| Wang <sup>235</sup>        | 2017 | Respiratory Research                                     | No      | No | No      |   |
| Kawalec <sup>236</sup>     | 2018 | Rheumatology International                               | No      | No | No      |   |
| Malhotra <sup>237</sup>    | 2018 | Stroke                                                   | No      | No | No      |   |
| Zhang <sup>238</sup>       | 2018 | Surgical Laparoscopy Endoscopy & Percutaneous Techniques | No      | No | No      |   |
| Yamashita <sup>239</sup>   | 2018 | Thrombosis Research                                      | No      | No | Partial | E |
| Zhang <sup>240</sup>       | 2018 | Vaccine                                                  | No      | No | No      |   |
| <b>Other (n = 10)</b>      |      |                                                          |         |    |         |   |
| Medical Science            |      |                                                          |         |    |         |   |
| Chen <sup>241</sup>        | 2018 | Monitor                                                  | No      | No | No      |   |
| Arteagoitia <sup>242</sup> | 2018 | PLOS ONE                                                 | No      | No | No      |   |
| Feng <sup>243</sup>        | 2018 | PLOS ONE                                                 | No      | No | No      |   |
| Kawakami <sup>244</sup>    | 2018 | PLOS ONE                                                 | No      | No | No      |   |
| Li <sup>245</sup>          | 2018 | PLOS ONE                                                 | No      | No | No      |   |
| Lin <sup>246</sup>         | 2017 | PLOS ONE                                                 | No      | No | No      |   |
| Ling <sup>247</sup>        | 2018 | PLOS ONE                                                 | No      | No | No      |   |
| Rohner <sup>248</sup>      | 2017 | PLOS ONE                                                 | No      | No | No      |   |
| Sethi <sup>249</sup>       | 2018 | PLOS ONE                                                 | Partial | No | No      | F |
| Wolf <sup>250</sup>        | 2018 | PLOS ONE                                                 | No      | No | No      |   |

<sup>a</sup>Funding sources categorized as government funded, industry funded, or mixed for most trials. Specific details about funding were reported for 2 trials and details on author ties and employment were reported for a single trial; <sup>b</sup>Authors reported extracting funding sources from included RCTs but funding sources are only reported for a single study; <sup>c</sup>Reported funding sources for all included studies except for one; <sup>d</sup>Reported author financial ties for all included studies except for 2; <sup>e</sup>Non-industry author employment reported for some included RCTs; <sup>f</sup>Funding sources and author ties reported for all included RCTs except one that was a conference abstract; <sup>g</sup>Funding sources only reported for a single RCT; <sup>h</sup>Authors reported whether or not included RCTs had declared COI (yes, no) and, if yes, indicated the page of the original study the declaration could be found on. This was coded as partially reporting because the nature of these COI was not reported within the meta-analysis publication itself and it was unclear whether these were financial ties and whether they were with industry; <sup>i</sup>Non-industry author financial ties reported for some included RCTs; <sup>j</sup>A single RCT was reported as 'industry sponsored' with no specifics about the sponsor; <sup>k</sup>Authors coded studies as sponsored by industry or not, and any of author industry affiliation, industry funding, or data obtained from pharmaceutical company qualified an RCT as 'sponsored'; <sup>l</sup>Authors report that 'some trials had a high risk of reporting bias because they were sponsored by pharmaceutical companies' but do not specify which or even how many trials; <sup>m</sup>Authors reported that all included RCTs had authors with financial ties to industry but provided no further information; <sup>n</sup>Reported whether each included RCT was industry funded (yes or no) but provided no further information; <sup>o</sup>For some analyses the authors reported how many included RCTs were non-commercially funded and present results including only non-commercially funded trials, but do not provide further information on which trials were commercially funded; <sup>p</sup>Authors state 14 trials were industry-sponsored and reference figure 1 in the supplementary material where 14 studies were marked as high risk for other bias, but it is not explicitly specified what was considered as 'other bias'; <sup>q</sup>Authors considered RCT funding sources within 'other bias'. In their risk of bias assessment but did not report any specific information; <sup>r</sup>Authors report that most studies were funded by the pharmaceutical industry and refer readers to figure 2 (risk of bias figure), but the figure does not give any information about which RCTs; <sup>s</sup>Included RCTs were coded as having company funding (Yes/No).

**References for eTable1 and eTable2**

1. Abdel-Rahman O, Elsayed Z, Elhalawani H. Gemcitabine-based chemotherapy for advanced biliary tract carcinomas. *Cochrane Database of Syst Rev.* 2018;4.
2. Adams SP, Sekhon SS, Tsang M, Wright JM. Fluvastatin for lowering lipids. *Cochrane Database of Syst Rev.* 2018;3.
3. Agabio R, Trogu E, Pani PP. Antidepressants for the treatment of people with co-occurring depression and alcohol dependence. *Cochrane Database of Syst Rev.* 2018;4.
4. Al-Shahi Salman, Law ZK, Bath PM, Steiner T, Sprigg N. Haemostatic therapies for acute spontaneous intracerebral haemorrhage. *Cochrane Database of Syst Rev.* 2018;4.
5. Alabed S, Latifeh Y, Mohammad HA, Bergman H. Gamma-aminobutyric acid agonists for antipsychotic-induced tardive dyskinesia. *Cochrane Database of Syst Rev.* 2018;4.
6. Allegretti AS, Israelsen M, Krag A, Jovani M, Goldin AH, Schulman AR, et al. Terlipressin versus placebo or no intervention for people with cirrhosis and hepatorenal syndrome. *Cochrane Database of Syst Rev.* 2017;6.
7. Arechabala MC, Catoni MI, Claro JC, Rojas NP, Rubio ME, Calvo MA, et al. Antimicrobial lock solutions for preventing catheter-related infections in haemodialysis. *Cochrane Database of Syst Rev.* 2018;4.
8. Baandrup L, Ebdrup BH, JØ R, Lindschou J, Gluud C, Glenthøj BY. Pharmacological interventions for benzodiazepine discontinuation in chronic benzodiazepine users. *Cochrane Database of Syst Rev.* 2018;3.
9. Bala MM, Paszek E, Lesniak W, Wloch-Kopec D, Jasinska K, Undas A. Antiplatelet and anticoagulant agents for primary prevention of thrombosis in individuals with antiphospholipid antibodies. *Cochrane Database of Syst Rev.* 2018;7.
10. Barbato A, Avanzo BD, Parabiaghi A. Couple therapy for depression. *Cochrane Database of Syst Rev.* 2018;6.
11. Bergman H, Bhoopathi PS, Soares-Weiser K. Benzodiazepines for antipsychotic-induced tardive dyskinesia. *Cochrane Database of Syst Rev.* 2018;1.
12. Bighelli I, Castellazzi M, Cipriani A, Girlanda F, Guaiana G, Koesters M, et al. Antidepressants versus placebo for panic disorder in adults. *Cochrane Database of Syst Rev.* 2018;4.

13. Birks JS, Harvey RJ. Donepezil for dementia due to Alzheimer's disease. *Cochrane Database of Syst Rev.* 2018;6.
14. Boyapati RK, Torres J, Palmela C, Parker CE, Silverberg OM, Upadhyaya SD, et al. Withdrawal of immunosuppressant or biologic therapy for patients with quiescent Crohn's disease. *Cochrane Database of Syst Rev.* 2018;5.
15. Brown J, Crawford TJ, Datta S, Prentice A. Oral contraceptives for pain associated with endometriosis. *Cochrane Database of Syst Rev.* 2018;5.
16. Bruins Slot KMH, Berge E. Factor Xa inhibitors versus vitamin K antagonists for preventing cerebral or systemic embolism in patients with atrial fibrillation. *Cochrane Database of Syst Rev.* 2018;3.
17. Bryan EJ, Purcell MA, Kumar A. Zuclopenthixol dihydrochloride for schizophrenia. *Cochrane Database of Syst Rev.* 2017;11.
18. Bryant-Smith AC, Lethaby A, Farquhar C, Hickey M. Antifibrinolytics for heavy menstrual bleeding. *Cochrane Database of Syst Rev.* 2018;4.
19. Burry L, Mehta S, Perreault MM, Luxenberg JS, Siddiqi N, Hutton B, et al. Antipsychotics for treatment of delirium in hospitalised non-ICU patients. *Cochrane Database of Syst Rev.* 2018;6.
20. Campschroer T, Zhu X, Vernooij RW, Lock MT. Alpha-blockers as medical expulsive therapy for ureteral stones. *Cochrane Database of Syst Rev.* 2018;4.
21. Candy B, Jones L, Vickerstaff V, Larkin PJ, Stone P. Mu-opioid antagonists for opioid-induced bowel dysfunction in people with cancer and people receiving palliative care. *Cochrane Database of Syst Rev.* 2018;6.
22. Chiew AL, Gluud C, Brok J, Buckley NA. Interventions for paracetamol (acetaminophen) overdose. *Cochrane Database of Syst Rev.* 2018;2.
23. Das RR, Singh M, Naik SS. Vitamin D as an adjunct to antibiotics for the treatment of acute childhood pneumonia. *Cochrane Database of Syst Rev.* 2018;7.
24. Demicheli V, Jefferson T, Ferroni E, Rivetti A, Pietrantonj CD. Vaccines for preventing influenza in healthy adults. *Cochrane Database of Syst Rev.* 2018;2.
25. Demicheli V, Jefferson T, Pietrantonj CD, Ferroni E, Thorning S, Thomas RE, et al. Vaccines for preventing influenza in the elderly. *Cochrane Database of Syst Rev.* 2018;2.

26. Di Nisio M, Wichers IM, Middeldorp S. Treatment for superficial thrombophlebitis of the leg. *Cochrane Database of Syst Rev.* 2018;2.
27. El-Sayeh HG, Rathbone J, Soares-Weiser K, Bergman H. Non-antipsychotic catecholaminergic drugs for antipsychotic-induced tardive dyskinesia. *Cochrane Database of Syst Rev.* 2018;1.
28. Engelen ET, Schutgens RE, Mauser-Bunschoten EP, Es RJv, Galen KPv. Antifibrinolytic therapy for preventing oral bleeding in people on anticoagulants undergoing minor oral surgery or dental extractions. *Cochrane Database of Syst Rev.* 2018;7.
29. Eshun-Wilson I, Siegfried N, Akena DH, Stein DJ, Obuku EA, Joska JA. Antidepressants for depression in adults with HIV infection. *Cochrane Database of Syst Rev.* 2018;1.
30. Essali A, Soares-Weiser K, Bergman H, Adams CE. Calcium channel blockers for antipsychotic-induced tardive dyskinesia. *Cochrane Database of Syst Rev.* 2018;3.
31. Everitt H, Baldwin DS, Stuart B, Lipinska G, Mayers A, Malizia AL, et al. Antidepressants for insomnia in adults. *Cochrane Database of Syst Rev.* 2018;5.
32. Fanshawe TR, Halliwell W, Lindson N, Aveyard P, Livingstone-Banks J, Hartmann-Boyce J. Tobacco cessation interventions for young people. *Cochrane Database of Syst Rev.* 2017;11.
33. Franik S, Eltrop SM, Kremer JA, Kiesel L, Farquhar C. Aromatase inhibitors (letrozole) for subfertile women with polycystic ovary syndrome. *Cochrane Database of Syst Rev.* 2018;5.
34. González R, Pons-Duran C, Piqueras M, Aponte JJ, Kuile FOT, Menéndez C. Mefloquine for preventing malaria in pregnant women. *Cochrane Database of Syst Rev.* 2018;3.
35. Grabosch SM, Shariff OM, Helm CW. Non-steroidal anti-inflammatory agents to induce regression and prevent the progression of cervical intraepithelial neoplasia. *Cochrane Database of Syst Rev.* 2018;2.
36. Graves PM, Choi L, Gelband H, Garner P. Primaquine or other 8-aminoquinolines for reducing *Plasmodium falciparum* transmission. *Cochrane Database of Syst Rev.* 2018;2.
37. Haas DM, Morgan S, Contreras K, Enders S. Vaginal preparation with antiseptic solution before cesarean section for preventing postoperative infections. *Cochrane Database of Syst Rev.* 2018;7.



38. Hakoum MB, Kahale LA, Tsolakian IG, Matar CF, Yosunico VE, Terrenato I, et al. Anticoagulation for the initial treatment of venous thromboembolism in people with cancer. *Cochrane Database of Syst Rev.* 2018;1.
39. Heras-Mosteiro J, Monge-Maillo B, Pinart M, Pereira PL, Reveiz L, Garcia-Carrasco E, et al. Interventions for Old World cutaneous leishmaniasis. *Cochrane Database of Syst Rev.* 2017;12.
40. Janmaat VT, Steyerberg EW, Gaast Avd, Mathijssen RH, Bruno MJ, Peppelenbosch MP, et al. Palliative chemotherapy and targeted therapies for esophageal and gastroesophageal junction cancer. *Cochrane Database of Syst Rev.* 2017;11.
41. Jefferson T, Rivetti A, Pietrantonj CD, Demicheli V. Vaccines for preventing influenza in healthy children. *Cochrane Database of Syst Rev.* 2018;2.
42. Jung JH, Kim J, MacDonald R, Reddy B, Kim MH, Dahm P. Silodosin for the treatment of lower urinary tract symptoms in men with benign prostatic hyperplasia. *Cochrane Database of Syst Rev.* 2017;11.
43. Kaempfen S, Neumann RP, Jost K, Schulzke SM. Beta-blockers for prevention and treatment of retinopathy of prematurity in preterm infants. *Cochrane Database of Syst Rev.* 2018;3.
44. Kahale LA, Hakoum MB, Tsolakian IG, Matar CF, Barba M, Yosunico VED, et al. Oral anticoagulation in people with cancer who have no therapeutic or prophylactic indication for anticoagulation. *Cochrane Database of Syst Rev.* 2017;12.
45. Kahale LA, Tsolakian IG, Hakoum MB, Matar CF, Barba M, Yosunico VE, et al. Anticoagulation for people with cancer and central venous catheters. *Cochrane Database of Syst Rev.* 2018;6.
46. Kahale LA, Hakoum MB, Tsolakian IG, Matar CF, Terrenato I, Sperati F, et al. Anticoagulation for the long-term treatment of venous thromboembolism in people with cancer. *Cochrane Database of Syst Rev.* 2018;6.
47. Kapur N, Petsky HL, Bell S, Kolbe J, Chang AB. Inhaled corticosteroids for bronchiectasis. *Cochrane Database of Syst Rev.* 2018;5.
48. Kelly C, Chalmers JD, Crossingham I, Relph N, Felix LM, Evans DJ, et al. Macrolide antibiotics for bronchiectasis. *Cochrane Database of Syst Rev.* 2018;3.

49. Knightly R, Milan SJ, Hughes R, Knopp-Sihota JA, Rowe BH, Normansell R, et al. Inhaled magnesium sulfate in the treatment of acute asthma. *Cochrane Database of Syst Rev.* 2017;11.
50. Kopsaftis Z, Wood-Baker R, Poole P. Influenza vaccine for chronic obstructive pulmonary disease (COPD). *Cochrane Database of Syst Rev.* 2018;6.
51. Lawrie TA, Green JT, Beresford M, Wedlake L, Burden S, Davidson SE, et al. Interventions to reduce acute and late adverse gastrointestinal effects of pelvic radiotherapy for primary pelvic cancers. *Cochrane Database of Syst Rev.* 2018;1.
52. Leathersich SJ, Vogel JP, Tran TS, Hofmeyr GJ. Acute tocolysis for uterine tachysystole or suspected fetal distress. *Cochrane Database of Syst Rev.* 2018;7.
53. Lethaby A, Puscasiu L, Vollenhoven B. Preoperative medical therapy before surgery for uterine fibroids. *Cochrane Database of Syst Rev.* 2017;11.
54. López-Briz E, Garcia VR, Cabello JB, Bort-Martí S, Sanchis RC, Burls A. Heparin versus 0.9% sodium chloride locking for prevention of occlusion in central venous catheters in adults. *Cochrane Database of Syst Rev.* 2018;7.
55. Marchant JM, Petsky HL, Morris PS, Chang AB. Antibiotics for prolonged wet cough in children. *Cochrane Database of Syst Rev.* 2018;7.
56. Matar HE, Almerie MQ, Sampson SJ. Fluphenazine (oral) versus placebo for schizophrenia. *Cochrane Database of Syst Rev.* 2018;6.
57. Matar CF, Kahale LA, Hakoum MB, Tsolakian IG, Etxeandia-Ikobaltzeta I, Yosucio VE, et al. Anticoagulation for perioperative thromboprophylaxis in people with cancer. *Cochrane Database of Syst Rev.* 2018;7.
58. McNicol ED, Rowe E, Cooper TE. Ketorolac for postoperative pain in children. *Cochrane Database of Syst Rev.* 2018;7.
59. McTague A, Martland T, Appleton R. Drug management for acute tonic-clonic convulsions including convulsive status epilepticus in children. *Cochrane Database of Syst Rev.* 2018;1.
60. Mhaskar R, Kumar A, Miladinovic B, Djulbegovic B. Bisphosphonates in multiple myeloma: an updated network meta-analysis. *Cochrane Database of Syst Rev.* 2017;12.
61. Milligan R, Paul M, Richardson M, Neuberger A. Vaccines for preventing typhoid fever. *Cochrane Database of Syst Rev.* 2018;5.

62. Monk AB, Harrison JE, Worthington HV, Teague A. Pharmacological interventions for pain relief during orthodontic treatment. *Cochrane Database of Syst Rev.* 2017;11.
63. Montero N, Favà A, Rodriguez E, Barrios C, Cruzado JM, Pascual J, et al. Treatment for hepatitis C virus-associated mixed cryoglobulinaemia. *Cochrane Database of Syst Rev.* 2018;5.
64. Mücke M, Phillips T, Radbruch L, Petzke F, Häuser W. Cannabis-based medicines for chronic neuropathic pain in adults. *Cochrane Database of Syst Rev.* 2018;3.
65. Narula N, Dhillon A, Zhang D, Sherlock ME, Tondeur M, Zachos M. Enteral nutritional therapy for induction of remission in Crohn's disease. *Cochrane Database of Syst Rev.* 2018;4.
66. Nevitt SJ, Sudell M, Weston J, Smith CT, Marson AG. Antiepileptic drug monotherapy for epilepsy: a network meta-analysis of individual participant data. *Cochrane Database of Syst Rev.* 2017;12.
67. Nevitt SJ, Smith CT, Weston J, Marson AG. Lamotrigine versus carbamazepine monotherapy for epilepsy: an individual participant data review. *Cochrane Database of Syst Rev.* 2018;6.
68. Norman G, Westby MJ, Rithalia AD, Stubbs N, Soares MO, Dumville JC. Dressings and topical agents for treating venous leg ulcers. *Cochrane Database of Syst Rev.* 2018;6.
69. Normansell R, Sayer B, Waterson S, Dennett EJ, Forno MD, Dunleavy A. Antibiotics for exacerbations of asthma. *Cochrane Database of Syst Rev.* 2018;6.
70. Novoa M, Baselga E, Beltran S, Giraldo L, Shahbaz A, Pardo-Hernandez H, et al. Interventions for infantile haemangiomas of the skin. *Cochrane Database of Syst Rev.* 2018;4.
71. Ohlsson A, Aher SM. Early erythropoiesis-stimulating agents in preterm or low birth weight infants. *Cochrane Database of Syst Rev.* 2017;11.
72. Ostinelli EG, Jajawi S, Spyridi S, Sayal K, Jayaram MB. Aripiprazole (intramuscular) for psychosis-induced aggression or agitation (rapid tranquillisation). *Cochrane Database of Syst Rev.* 2018;1.
73. Ostinelli EG, Hussein M, Ahmed U, Rehman FU, Miramontes K, Adams CE. Risperidone for psychosis-induced aggression or agitation (rapid tranquillisation). *Cochrane Database of Syst Rev.* 2018;4.

74. Ostuzzi G, Matcham F, Dauchy S, Barbui C, Hotopf M. Antidepressants for the treatment of depression in people with cancer. *Cochrane Database of Syst Rev.* 2018;4.
75. Parker CE, Nguyen TM, Segal D, MacDonald JK, Chande N. Low dose naltrexone for induction of remission in Crohn's disease. *Cochrane Database of Syst Rev.* 2018;4.
76. Pasquali S, Hadjinicolaou AV, Sileni VC, Rossi CR, Mocellin S. Systemic treatments for metastatic cutaneous melanoma. *Cochrane Database of Syst Rev.* 2018;2.
77. Pike KC, Akhbari M, Kneale D, Harris KM. Interventions for autumn exacerbations of asthma in children. *Cochrane Database of Syst Rev.* 2018;3.
78. Rirash F, Tingey PC, Harding SE, Maxwell LJ, Ghogomu ET, Wells GA, et al. Calcium channel blockers for primary and secondary Raynaud's phenomenon. *Cochrane Database of Syst Rev.* 2017;12.
79. Robertson L, Yeoh SE, Ramli A. Secondary prevention of recurrent venous thromboembolism after initial oral anticoagulation therapy in patients with unprovoked venous thromboembolism. *Cochrane Database of Syst Rev.* 2017;12.
80. Romero L, Huerfano C, Grillo-Ardila CF. Macrolides for treatment of *Haemophilus ducreyi* infection in sexually active adults. *Cochrane Database of Syst Rev.* 2017;12.
81. Rosumeck S, Nast A, Dressler C. Ivermectin and permethrin for treating scabies. *Cochrane Database of Syst Rev.* 2018;4.
82. Rüschen H, Aravinth K, Bunce C, Bokre D. Use of hyaluronidase as an adjunct to local anaesthetic eye blocks to reduce intraoperative pain in adults. *Cochrane Database of Syst Rev.* 2018;3.
83. Ruthirakuhan MT, Herrmann N, Abraham EH, Chan S, Lanctôt KL. Pharmacological interventions for apathy in Alzheimer's disease. *Cochrane Database of Syst Rev.* 2018;5.
84. Sankar MJ, Sankar J, Chandra P. Anti-vascular endothelial growth factor (VEGF) drugs for treatment of retinopathy of prematurity. *Cochrane Database of Syst Rev.* 2018;1.
85. Schumann J, Henrich EC, Strobl H, Prondzinsky R, Weiche S, Thiele H, et al. Inotropic agents and vasodilator strategies for the treatment of cardiogenic shock or low cardiac output syndrome. *Cochrane Database of Syst Rev.* 2018;1.
86. Simancas-Racines D, Arevalo-Rodriguez I, Osorio D, Franco JV, Xu Y, Hidalgo R. Interventions for treating acute high altitude illness. *Cochrane Database of Syst Rev.* 2018;6.

87. Smith S, Edwards CT. Long-acting inhaled bronchodilators for cystic fibrosis. *Cochrane Database of Syst Rev.* 2017;12.
88. Smith LA, Burns E, Cuthbert A. Parenteral opioids for maternal pain management in labour. *Cochrane Database of Syst Rev.* 2018;6.
89. Soares-Weiser K, Rathbone J, Ogawa Y, Shinohara K, Bergman H. Miscellaneous treatments for antipsychotic-induced tardive dyskinesia. *Cochrane Database of Syst Rev.* 2018;3.
90. Squizzato A, Bellesini M, Takeda A, Middeldorp S, Donadini MP. Clopidogrel plus aspirin versus aspirin alone for preventing cardiovascular events. *Cochrane Database of Syst Rev.* 2017;12.
91. St George G, Morgan A, Meechan J, Moles DR, Needleman I, Ng YL, et al. Injectable local anaesthetic agents for dental anaesthesia. *Cochrane Database of Syst Rev.* 2018;7.
92. Stern A, Skalsky K, Avni T, Carrara E, Leibovici L, Paul M. Corticosteroids for pneumonia. *Cochrane Database of Syst Rev.* 2017;12.
93. Sturman N, Deckx L, Driel MLv. Methylphenidate for children and adolescents with autism spectrum disorder. *Cochrane Database of Syst Rev.* 2017;11.
94. Tammenmaa-Aho I, Asher R, Soares-Weiser K, Bergman H. Cholinergic medication for antipsychotic-induced tardive dyskinesia. *Cochrane Database of Syst Rev.* 2018;3.
95. Temmingh HS, Williams T, Siegfried N, Stein DJ. Risperidone versus other antipsychotics for people with severe mental illness and co-occurring substance misuse. *Cochrane Database of Syst Rev.* 2018;1.
96. Tenforde MW, Shapiro AE, Rouse B, Jarvis JN, Li T, Eshun-Wilson I, et al. Treatment for HIV-associated cryptococcal meningitis. *Cochrane Database of Syst Rev.* 2018;7.
97. Toews I, George AT, Peter JV, Kirubakaran R, Fontes LES, Ezekiel JPB, et al. Interventions for preventing upper gastrointestinal bleeding in people admitted to intensive care units. *Cochrane Database of Syst Rev.* 2018;6.
98. Venekamp RP, Mick P, Schilder AG, Nunez DA. Grommets (ventilation tubes) for recurrent acute otitis media in children. *Cochrane Database of Syst Rev.* 2018;5.
99. Vermeij JD, Westendorp WF, Dippel DW, Beek Dvd, Nederkoorn PJ. Antibiotic therapy for preventing infections in people with acute stroke. *Cochrane Database of Syst Rev.* 2018;1.

100. Vietto V, Franco JV, Saenz V, Cytryn D, Chas J, Ciapponi A. Prostanoids for critical limb ischaemia. *Cochrane Database of Syst Rev.* 2018;1.
101. Wall EC, Ajdukiewicz KM, Bergman H, Heyderman RS, Garner P. Osmotic therapies added to antibiotics for acute bacterial meningitis. *Cochrane Database of Syst Rev.* 2018;2.
102. Weibel S, Jeltng Y, Pace NL, Helf A, Eberhart LH, Hahnenkamp K, et al. Continuous intravenous perioperative lidocaine infusion for postoperative pain and recovery in adults. *Cochrane Database of Syst Rev.* 2018;6.
103. Wright JM, Musini VM, Gill R. First-line drugs for hypertension. *Cochrane Database of Syst Rev.* 2018;4.
104. Xiao Y, Luo M, Wang J, Luo H. Losigamone add-on therapy for focal epilepsy. *Cochrane Database of Syst Rev.* 2018;1.
105. Zhang X, Chuai Y, Nie W, Wang A, Dai G. Thrombopoietin receptor agonists for prevention and treatment of chemotherapy-induced thrombocytopenia in patients with solid tumours. *Cochrane Database of Syst Rev.* 2017;11.
106. Zhou M, Chen N, He L, Yang M, Zhu C, Wu F. Oxcarbazepine for neuropathic pain. *Cochrane Database of Syst Rev.* 2017;12.
107. Zonneveld TP, Richard E, Vergouwen MD, Nederkoorn PJ, Haan Rd, Roos YB, et al. Blood pressure-lowering treatment for preventing recurrent stroke, major vascular events, and dementia in patients with a history of stroke or transient ischaemic attack. *Cochrane Database of Syst Rev.* 2018;7.
108. López - López JA, Sterne JAC, Thom HHZ, Higgins JPT, Hingorani AD, Okoli GN, et al. Oral anticoagulants for prevention of stroke in atrial fibrillation: systematic review, network meta-analysis, and cost effectiveness analysis. *BMJ (Clinical research ed).* 2017;359.
109. Wang W, Chen W, Liu Y, Siemieniuk RAC, Li L, Martínez JPD, et al. Antibiotics for uncomplicated skin abscesses: systematic review and network meta-analysis. *BMJ Open.* 2018;8(2).
110. Cipriani A, Furukawa TA, Salanti G, Chaimani A, Atkinson LZ, Ogawa Y, et al. Comparative efficacy and acceptability of 21 antidepressant drugs for the acute treatment

- of adults with major depressive disorder: a systematic review and network meta-analysis. *Lancet*. 2018;391(10128)1357-66.
- 111.Chen M, Ji M, Si X. The effects of statin therapy on mortality in patients with sepsis: A meta-analysis of randomized trials. *Medicine*. 2018;97(31).
- 112.Ding W, Li Z, Wang C, Ruan G, Chen L, Tu C. The CDK4/6 inhibitor in HR-positive advanced breast cancer: A systematic review and meta-analysis. *Medicine*. 2018;97(20).
- 113.Guo P, He Z, Wang Y, Gao F, Sun W, Guo W, et al. Efficacy and safety of oral tranexamic acid in total knee arthroplasty: A systematic review and meta-analysis. *Medicine*. 2018;97(18).
- 114.Han X, Zhang Y, Yin L, Zhang L, Wang Y, Zhang H, et al. Statin in the treatment of patients with myocardial infarction: A meta-analysis. *Medicine*. 2018;97(12).
- 115.Hu W, Tong J, Kuang X, Chen W, Liu Z. Influence of proton pump inhibitors on clinical outcomes in coronary heart disease patients receiving aspirin and clopidogrel: A meta-analysis. *Medicine*. 2018;97(3).
- 116.Huang ST, Tian BS, Xiao O, Yang YJ, Zhou SY. Safety of antivascular endothelial growth factor administration in the ocular anterior segment in pterygium and neovascular glaucoma treatment: Systematic review and meta-analysis. *Medicine*. 2018;97(34).
- 117.Jiang DQ, Xu LC, Jiang LL, Li MX, Wang Y. Fasudil combined with methylcobalamin or lipoic acid can improve the nerve conduction velocity in patients with diabetic peripheral neuropathy: A meta-analysis. *Medicine*. 2018;97(27).
- 118.Jiang Y, Sun X, Kong B, Jiang J. Antiangiogenesis therapy in ovarian cancer patients: An updated meta-analysis for 15 randomized controlled trials. *Medicine*. 2018;97(34).
- 119.Khan M, Lin J, Liao G, Tian Y, Liang Y, Li R, et al. Comparative analysis of immune checkpoint inhibitors and chemotherapy in the treatment of advanced non-small cell lung cancer: A meta-analysis of randomized controlled trials. *Medicine*. 2018;97(33).
- 120.Liang L, Cai Y, Li A, Ma C. The efficiency of intravenous acetaminophen for pain control following total knee and hip arthroplasty: A systematic review and meta-analysis. *Medicine*. 2017;96(46).
- 121.Liu X, Li X, Zhang C, Sun M, Sun Z, Xu Y, et al. Efficacy and tolerability of fluvoxamine in adults with social anxiety disorder: A meta-analysis. *Medicine*. 2018;97(28).

122. Lor YC, Shih PC, Chen HH, Liu SJ, Chao HC, Hwang LC, et al. The application of lidocaine to alleviate the discomfort of nasogastric tube insertion: A systematic review and meta-analysis. *Medicine*. 2018;97(5).
123. Wang W, Yu J. Tranexamic acid reduces blood loss in intertrochanteric fractures: A meta-analysis from randomized controlled trials. *Medicine*. 2017;96(52).
124. Wang H, Liu A, Bo W, Feng X, Hu Y. Terlipressin in the treatment of hepatorenal syndrome: A systematic review and meta-analysis. *Medicine*. 2018;97(16).
125. Wang Z, Hu Z, Dai T. The comparison of propofol and midazolam for bronchoscopy: A meta-analysis of randomized controlled studies. *Medicine*. 2018;97(36).
126. Wei W, Luo Z. Risk of gastrointestinal toxicities with PD-1 inhibitors in cancer patients: A meta-analysis of randomized clinical trials. *Medicine*. 2017;96(48).
127. Woo HL, Ji HR, Pak YK, Lee H, Heo SJ, Lee JM, et al. The efficacy and safety of acupuncture in women with primary dysmenorrhea: A systematic review and meta-analysis. *Medicine*. 2018;97(23).
128. Xia Y, Fang H, Xu J, Jia C, Tao G, Yu B. Clinical efficacy of xenon versus propofol: A systematic review and meta-analysis. *Medicine*. 2018;97(20).
129. Yang Q, Zhang Z, Xin W, Li A. Preoperative intravenous glucocorticoids can decrease acute pain and postoperative nausea and vomiting after total hip arthroplasty: A PRISMA-compliant meta-analysis. *Medicine*. 2017;96(47).
130. Ye F, Wu Y, Zhou C. Effect of intravenous ketamine for postoperative analgesia in patients undergoing laparoscopic cholecystectomy: A meta-analysis. *Medicine*. 2017;96(51).
131. Yu L, Cao L, Sun J, Li Z, Yao F, Zhou Y. Serelaxin, recombinant human relaxin-2, for heart failure patients: A systematic review and meta-analysis. *Medicine*. 2018;97(25).
132. Yuan C, Xu XH, Luo SW, Wang L, Sun M, Ni LH, et al. Which neoadjuvant chemotherapy regimen should be recommended for patients with advanced nasopharyngeal carcinoma?: A network meta-analysis. *Medicine*. 2018;97(34).
133. Zhang JJ, Liu X. Aspirin plus dipyridamole has the highest surface under the cumulative ranking curves (SUCRA) values in terms of mortality, intracranial hemorrhage, and adverse event rate among 7 drug therapies in the treatment of cerebral infarction. *Medicine*. 2018;97(13).



134. Zhang J, Cai WK, Zhang Z, Wang P, Lin XQ, Feng J, et al. Cardioprotective effect of histamine H2 antagonists in congestive heart failure: A systematic review and meta-analysis. *Medicine*. 2018;97(15).
135. Zhao JB, Li YL, Wang YM, Teng JL, Xia DY, Zhao JS, et al. Intravenous lidocaine infusion for pain control after laparoscopic cholecystectomy: A meta-analysis of randomized controlled trials. *Medicine*. 2018;97(5).
136. Zhao T, Shen Z, Sheng S. The efficacy and safety of nefopam for pain relief during laparoscopic cholecystectomy: A meta-analysis. *Medicine*. 2018;97(10).
137. Zhou G, Ma L, Jing J, Jiang H. A meta-analysis of dexamethasone for pain management in patients with total knee arthroplasty. *Medicine*. 2018;97(35).
138. Zhu XT, Chen L, Lin JH. Selective COX-2 inhibitor versus non-selective COX-2 inhibitor for the prevention of heterotopic ossification after total hip arthroplasty: A meta-analysis. *Medicine*. 2018;97(31).
139. Zhou J, Zhang Q, Wang Y, Gao P, Chen D. The effect and safety of anacetrapib in the treatment of dyslipidemia: a systematic review and meta-analysis. *Postgrad Med*. 2018;130(1):129-36.
140. Zhang Y, Tao LN, Qu XY, Niu JQ, Ding YH, Zhang SX. Efficacy and safety of ceftazidime-avibactam in the treatment of complicated intra-abdominal infections (CIAIs) and complicated urinary tract infections (CUTIs): A meta-analysis of randomized controlled trials. *Rev Assoc Med Bras*. 2018;64(3):253-63.
141. Li F, Huang W, Zhang X. Efficacy and safety of different regimens for primary open-angle glaucoma or ocular hypertension: a systematic review and network meta-analysis. *Acta Ophthalmol*. 2018;96(3):e277-84.
142. Tarantini G, Ueshima D, Amico GD, Masiero G, Musumeci G, Stone GW, et al. Efficacy and safety of potent platelet P2Y12 receptor inhibitors in elderly versus nonelderly patients with acute coronary syndrome: A systematic review and meta-analysis. *Am Heart J*. 2018;195:78-85.
143. Wang Y, Wang J, Wang S. Comparative Effectiveness of Inclisiran 100, 300, and 500 mg in a Population with Hyperlipidemia: A Network Meta-Analysis of Randomized Controlled Trials. *Am J Cardiovasc Drugs*. 2018;18(4):271-82.

144. Aman A, Salim B, Munshi K, Raza SA, Khan FA. Effect on neonatal outcome of pharmacological interventions for attenuation of the maternal haemodynamic response to tracheal intubation: a systematic review. *Anaesth Intensive Care*. 2018;46(3):258-71.
145. Li GM, Zhao J, Li B, Zhang XF, Ma JX, Ma XL, et al. The anti-inflammatory effects of statins on patients with rheumatoid arthritis: A systemic review and meta-analysis of 15 randomized controlled trials. *Autoimmun Rev*. 2018;17(3):215-25.
146. Wang B, He X, Gong Y, Cheng B. Levosimendan in Patients with Left Ventricular Dysfunction Undergoing Cardiac Surgery: An Update Meta-Analysis and Trial Sequential Analysis. *BioMed Res Int*. 2018;2018:1-10.
147. Veettil SK, Lim KG, Ching SM, Saokaew S, Phisalprapa P, Chaiyakunapruk N. Effects of aspirin and non-aspirin nonsteroidal anti-inflammatory drugs on the incidence of recurrent colorectal adenomas: a systematic review with meta-analysis and trial sequential analysis of randomized clinical trials. *BMC Cancer*. 2017;17(1):763.
148. Bredemeier M, Lopes LM, Eisenreich MA, Hickmann S, Bongiorno GK, d'Avila R, et al. Xanthine oxidase inhibitors for prevention of cardiovascular events: a systematic review and meta-analysis of randomized controlled trials. *BMC Cardiovasc Disord*. 2018;18(1):24.
149. Lyu Y, Cheng Y, Wang B, Xu Y, Du W. What is impact of nonsteroidal anti-inflammatory drugs in the prevention of post-endoscopic retrograde cholangiopancreatography pancreatitis: a meta-analysis of randomized controlled trials. *BMC Gastroenterol*. 2018;18(1):106.
150. Xing Y, Chen L, Feng Y, Zhou Y, Zhai Y, Lu J. Meta-analysis of the safety of voriconazole in definitive, empirical, and prophylactic therapies for invasive fungal infections. *BMC Infect Dis*. 2017;17(1):798..
151. Kuo LT, Hsu WH, Chi CC, Yoo JC. Tranexamic acid in total shoulder arthroplasty and reverse shoulder arthroplasty: a systematic review and meta-analysis. *BMC Musculoskelet Disord*. 2018;19(1):60.
152. Beez T, Steiger HJ, Etminan N. Pharmacological targeting of secondary brain damage following ischemic or hemorrhagic stroke, traumatic brain injury, and bacterial meningitis - a systematic review and meta-analysis. *BMC Neurol*. 2017;17(1):209.

153. Zeng W, Liu Z, Dai H, Yan M, Luo H, Ke M, et al. Anti-fibrotic, anti-VEGF or radiotherapy treatments as adjuvants for pterygium excision: a systematic review and network meta-analysis. *BMC Ophthalmol.* 2017;17(1):211.
154. Bundhun PK, Shi JX, Huang F. Head to head comparison of Prasugrel versus Ticagrelor in patients with acute coronary syndrome: a systematic review and meta-analysis of randomized trials. *BMC Pharmacol Toxicol.* 2017;18(1):80.
155. Zhang Y, Liu Y, Su Y, You Y, Ma Y, Yang G, et al. The metabolic side effects of 12 antipsychotic drugs used for the treatment of schizophrenia on glucose: a network meta-analysis. *BMC Psychiatry.* 2017;17(1):373.
156. Zhang HL, Tan M, Qiu AM, Tao Z, Wang CH. Antibiotics for treatment of acute exacerbation of chronic obstructive pulmonary disease: a network meta-analysis. *BMC pulmonary medicine.* 2017;17(1):196.
157. Zhang ZQ, Zhong Y, Huang XM, Du LZ. Airway administration of corticosteroids for prevention of bronchopulmonary dysplasia in premature infants: a meta-analysis with trial sequential analysis. *BMC Pulm Med.* 2017;17(1):207.
158. Ramos-Esquivel A, Hernández-Steller H, Savard MF, Landaverde DU. Cyclin-dependent kinase 4/6 inhibitors as first-line treatment for post-menopausal metastatic hormone receptor-positive breast cancer patients: a systematic review and meta-analysis of phase III randomized clinical trials. *Breast Cancer.* 2018;25(4):479-88.
159. Zeng C, Wei J, Persson MSM, Sarmanova A, Doherty M, Xie D, et al. Relative efficacy and safety of topical non-steroidal anti-inflammatory drugs for osteoarthritis: a systematic review and network meta-analysis of randomised controlled trials and observational studies. *Br J Sports Med.* 2018;52(10):642-50.
160. Shui L, Wu YS, Lin H, Shui P, Sun Q, Chen X. Triplet Chemotherapy (FOLFOXIRI) Plus Bevacizumab Versus Doublet Chemotherapy (FOLFOX/FOLFIRI) Plus Bevacizumab in Conversion Therapy for Metastatic Colorectal Cancer: a Meta-Analysis. *Cell Physiol Biochem.* 2018;48(5):1870-81.
161. Rodrigo C, Weeratunga P, Fernando SD, Rajapakse S. Amphotericin B for treatment of visceral leishmaniasis: systematic review and meta-analysis of prospective comparative clinical studies including dose-ranging studies. *Clin Microbiol Infect.* 2018;24(6):591-8.

162. Wang S, He Q, Shuai Z. Risk of serious infections in biological treatment of patients with ankylosing spondylitis and non-radiographic axial spondyloarthritis: a meta-analysis. *Clin Rheumatol*. 2018;37(2):439-50.
163. Hong Y, Mansour S, Alotaibi G, Wu C, McMurtry MS. Effect of anticoagulants on admission rates and length of hospital stay for acute venous thromboembolism: A systematic review of randomized control trials. *Crit Rev Oncol Hematol*. 2018;125:12-18.
164. de Carvalho LSFd, Campos AM, Sposito AC. Proprotein Convertase Subtilisin/Kexin Type 9 (PCSK9) Inhibitors and Incident Type 2 Diabetes: A Systematic Review and Meta-analysis With Over 96,000 Patient-Years. *Diabetes Care*. 2018;41(2):364-7.
165. Jaafar MH, Safi SZ, Tan MP, Rampal S, Mahadeva S. Efficacy of Rebamipide in Organic and Functional Dyspepsia: A Systematic Review and Meta-Analysis. *Dig Dis Sci*. 2018;63(5):1250-60.
166. Liu J, Wang LN. The efficacy and safety of riluzole for neurodegenerative movement disorders: a systematic review with meta-analysis. *Drug Deliv*. 2018;25(1):43-8.
167. Liu LY, Liu Y, Wu MY, Sun YY, Ma FZ. Efficacy of atorvastatin on the prevention of contrast-induced acute kidney injury: a meta-analysis. *Drug Des Devel Ther*. 2018;12:437.
168. Sun S, Wang J, Bao N, Chen Y, Wang J. Comparison of dexmedetomidine and fentanyl as local anesthetic adjuvants in spinal anesthesia: a systematic review and meta-analysis of randomized controlled trials. *Drug Des Devel Ther*. 2017;11:3413.
169. Paraschakis A, Katsanos AH. Antidepressants for Depression Associated with Traumatic Brain Injury: A Meta-analytical Study of Randomised Controlled Trials. *East Asian Arch Psychiatry*. 2017;27(4):142.
170. D'Souza RS, Mercogliano C, Ojukwu E, Souza SD, Singles A, Modi J, et al. Effects of prophylactic anticholinergic medications to decrease extrapyramidal side effects in patients taking acute antiemetic drugs: a systematic review and meta-analysis. *Emerg Med J*. 2018;35(5):325-31.
171. Mei L, Hou Q, Fang F, Wang H. The antibody-based CA125-targeted maintenance therapy for the epithelial ovarian cancer: a meta-analysis. *Eur J Gynaecol Oncol*. 2016;37(4):455-60.

172. Verberkt CA, Everdingen MHJvdB-v, Schols J, Datla S, Dirksen CD, Johnson MJ, et al. Respiratory adverse effects of opioids for breathlessness: a systematic review and meta-analysis. *Eur Respir J*. 2017;50(5):1701153.
173. Sridharan K, Sivaramakrishnan G, Gnanaraj J. Pharmacological interventions for stress ulcer prophylaxis in critically ill patients: a mixed treatment comparison network meta-analysis and a recursive cumulative meta-analysis. *Expert Opin Pharmacother*. 2018;19(2):151-8.
174. Habibi MR, Habibi V, Habibi A, Soleimani A. Lidocaine dose-response effect on postoperative cognitive deficit: meta-analysis and meta-regression. *Expert Rev Clin Pharmacol*. 2018;11(4):361-71.
175. Li Y, Liu H, Peng W, Song Z. Nicorandil improves clinical outcomes in patients with stable angina pectoris requiring PCI: a systematic review and meta-analysis of 14 randomized trials. *Expert Rev Clin Pharmacol*. 2018;11(9):855-65.
176. Sangroongruangsri S, Ratanapakorn T, Wu O, Anothaisintawee T, Chaikledkaew U. Comparative efficacy of bevacizumab, ranibizumab, and aflibercept for treatment of macular edema secondary to retinal vein occlusion: a systematic review and network meta-analysis. *Expert Rev Clin Pharmacol*. 2018;11(9):903-16.
177. Hickey BA, Watson U, Cleves A, Alikhan R, Pugh N, Nokes L, et al. Does thromboprophylaxis reduce symptomatic venous thromboembolism in patients with below knee cast treatment for foot and ankle trauma? A systematic review and meta-analysis. *Foot Ankle Surg*. 2018;24(1):19-27.
178. Zhao TT, Xu H, Xu HM, Wang ZN, Xu YY, Song YX, et al. The efficacy and safety of targeted therapy with or without chemotherapy in advanced gastric cancer treatment: a network meta-analysis of well-designed randomized controlled trials. *Gastric Cancer*. 2018;21(3):361-71.
179. Khara R, Pandey A, Chandar AK, Murad MH, Prokop LJ, Neeland IJ, et al. Effects of Weight-Loss Medications on Cardiometabolic Risk Profiles: A Systematic Review and Network Meta-analysis. *Gastroenterology*. 2018;154(5):1309-19.
180. Li J, Li S, Yu H, Wang J, Xu C, Lu X. The efficacy and safety of first-line single-agent chemotherapy regimens in low-risk gestational trophoblastic neoplasia: A network meta-analysis. *Gynecol Oncol*. 2018;148(2):247-53.

181. Zhuge L, Wang Y, Wu S, Zhao RL, Li Z, Xie Y. Furazolidone treatment for Helicobacter Pylori infection: A systematic review and meta-analysis. *Helicobacter*. 2018;23(2):e12468.
182. Kim MK, Myung SK, Tran BT, Park B. Statins and risk of cancer: A meta-analysis of randomized, double-blind, placebo-controlled trials. *Indian J Cancer*. 54(2):470.
183. Garg R, Mohan BP, Krishnamoorthi R, Rustagi T. Pre-endoscopic retrograde cholangiopancreatography (ERCP) administration of rectal indomethacin in unselected patients to reduce post-ERCP pancreatitis: A systematic review and meta-analysis. *Indian J Gastroenterol*. 2018;37(2):120-6.
184. Rosanova MT, Bes D, Aguilar PS, Sberna N, Lede R. Efficacy and safety of voriconazole in immunocompromised patients: systematic review and meta-analysis. *Infect Dis (Lond)*. 2018;50(7):489-94.
185. Yu J, Lu H, Zhou J, Xie Z, Wen C, Xu Z. Oral prednisolone versus non-steroidal anti-inflammatory drugs in the treatment of acute gout: a meta-analysis of randomized controlled trials. *Inflammopharmacology*. 2018;26(3):717-23.
186. Kakkos SK, Nicolaidis AN. Efficacy of micronized purified flavonoid fraction (Daflon) on improving individual symptoms, signs and quality of life in patients with chronic venous disease: a systematic review and meta-analysis of randomized double-blind placebo-controlled trials. *Int Angiol*. 2018;37(2).
187. Ou Z, Chen C, Chen A, Yang Y, Zhou W. Adverse events of Dupilumab in adults with moderate-to-severe atopic dermatitis: A meta-analysis. *Intimmunopharmacol*. 2018;54:303-10.
188. Yin J, Xu B, Zeng X, Shen K. Broncho-Vaxom in pediatric recurrent respiratory tract infections: A systematic review and meta-analysis. *Int immunopharmacol*. 2018;54:198-209.
189. Zhu J, Zhao W, Liang D, Li G, Qiu K, Wu J, et al. Risk of fatigue in cancer patients receiving anti-EGFR monoclonal antibodies: results from a systematic review and meta-analysis of randomized controlled trial. *Int J Clin Oncol*. 2018;23(2):389-99.
190. Liu H, Xu X. Influence of adjunctive lacosamide in patients with seizures: a systematic review and meta-analysis. *Int J Neurosci*. 2018;128(7):670-6.

191. Cocolini F, Nardi M, Montori G, Ceresoli M, Celotti A, Cascinu S, et al. Neoadjuvant chemotherapy in advanced gastric and esophago-gastric cancer. Meta-analysis of randomized trials. *Int J Surgery*. 2018;51:120-7.
192. Fan Z, Ma J, Kuang M, Zhang L, Han B, Yang B, et al. The efficacy of dexamethasone reducing postoperative pain and emesis after total knee arthroplasty: A systematic review and meta-analysis. *Int J Surgery*. 2018;52:149-55.
193. Li J, Wang G, Xu W, Ding M, Yu W. Efficacy of intravenous lidocaine on pain relief in patients undergoing laparoscopic cholecystectomy: A meta-analysis from randomized controlled trials. *Int J Surgery*. 2018;50:137-45.
194. Li S, Sheng G, Teng Y, Sun M. Systematic review of anaesthetic medication for ERCP based on a network meta-analysis. *Int J Surgery*. 2018;51:56-62.
195. Liu Q, Geng P, Shi L, Wang Q, Wang P. Tranexamic acid versus aminocaproic acid for blood management after total knee and total hip arthroplasty: A systematic review and meta-analysis. *Int J Surgery*. 2018;54:105-12.
196. Ran J, Yang X, Ren Z, Wang J, Dong H. Comparison of intra-articular hyaluronic acid and methylprednisolone for pain management in knee osteoarthritis: A meta-analysis of randomized controlled trials. *Int J Surgery*. 2018;53:103-10.
197. Zhao M, Xiang P, Jiang H. TransArterial ChemoEmbolicization (TACE) with platinum versus anthracyclines for hepatocellular carcinoma: A meta-analysis. *Int J Surgery*. 2018;53:151-8.
198. Zhu J, Xie H, Zhang L, Chang L, Chen P. Efficiency and safety of ketamine for pain relief after laparoscopic cholecystectomy: A meta-analysis from randomized controlled trials. *Int J Surgery*. 2018;49:1-9.
199. Wagner G, Schultes MT, Titscher V, Teufer B, Klerings I, Gartlehner G. Efficacy and safety of levomilnacipran, vilazodone and vortioxetine compared with other second-generation antidepressants for major depressive disorder in adults: A systematic review and network meta-analysis. *J Affect Disord*. 2018;228:1-12.
200. Hickman LC, Llarena NC, Valentine LN, Liu X, Falcone T. Preservation of gonadal function in women undergoing chemotherapy: a systematic review and meta-analysis of the potential role for gonadotropin-releasing hormone agonists. *J Assist Reprod Genet*. 2018;35(4):571-81.

201. Luo W, Wang Z, Tian P, Li W. Safety and tolerability of PD-1/PD-L1 inhibitors in the treatment of non-small cell lung cancer: a meta-analysis of randomized controlled trials. *J Cancer Res Clin Oncol*. 2018;144(10):1851-9.
202. Wang Y, Zhang H, Shen W, He P, Zhou Z. Effectiveness and tolerability of targeted drugs for the treatment of metastatic castration-resistant prostate cancer: a network meta-analysis of randomized controlled trials. *J Cancer Res Clin Oncol*. 2018;144(9):1751-68.
203. Wang DD, Ma TT, Zhu HD, Peng CB. Transdermal fentanyl for cancer pain: Trial sequential analysis of 3406 patients from 35 randomized controlled trials. *J Cancer Res Ther*. 2018;14(8):14.
204. Aboul-Hassan SS, Stankowski T, Marczak J, Peksa M, Nawotka M, Stanislawski R, et al. The use of preoperative aspirin in cardiac surgery: A systematic review and meta-analysis. *J Card Surg*. 2017;32(12):758-74.
205. Wang Y, Zhu S, R DU, Zhou J, Chen Y, Zhang Q. Statin initiation and renal outcomes following isolated coronary artery bypass grafting: a meta-analysis. *J Card Surg*. 2018;59(2):282-90.
206. Barrionuevo P, Nabhan M, Altayar O, Wang Z, Erwin PJ, Asi N, et al. Treatment Options for Hirsutism: A Systematic Review and Network Meta-Analysis. *J Clin Endocrinol Metab*. 2018;103(4):1258-64.
207. Cui JY, Zhou RR, Han S, Wang TS, Wang LQ, Xie XH. Statin therapy on glycemic control in type 2 diabetic patients: A network meta-analysis. *J Clin Pharm Ther*. 2018;43(4):556-70.
208. Sawyer L, Fotheringham I, Wright E, Yasmeen N, Gibbons C, Møller AH. The comparative efficacy of brodalumab in patients with moderate-to-severe psoriasis: a systematic literature review and network meta-analysis. *J Dermatolog Treat*. 2018;29(6):557-68.
209. Markey GC, Salter N, Ryan J. Intravenous Flecainide for Emergency Department Management of Acute Atrial Fibrillation. *J Emerg Med*. 2018;54(3):320-7.
210. Szabó IL, Mátics R, Hegyi P, Garami A, Illés A, Sarlós P, et al. PPIs Prevent Aspirin-Induced Gastrointestinal Bleeding Better than H2RAs. A Systematic Review and Meta-analysis. *J Gastrointest Liver Dis: JGLD*. 2017;26(4):395-402.



211. Su Q, Zhang XC, Zhang CG, Hou YL, Yao YX, Cao BW. Risk of Immune-Related Pancreatitis in Patients with Solid Tumors Treated with Immune Checkpoint Inhibitors: Systematic Assessment with Meta-Analysis. *J Immunol Res*. 2018;2018:1-9.
212. Chen C, Zhou X, Zhu M, Chen S, Chen J, Cai H, et al. Catheter ablation versus medical therapy for patients with persistent atrial fibrillation: a systematic review and meta-analysis of evidence from randomized controlled trials. *J Interv Card Electrophysiol*. 2018;52(1):9-18.
213. Chen X, Mou X, He Z, Zhu Y. The effect of midazolam on pain control after knee arthroscopy: a systematic review and meta-analysis. *J Orthop Surg Res*. 2017;12(1):179.
214. Li YJ, Xu BS, Bai SP, Guo XJ, Yan XY. The efficacy of intravenous aminocaproic acid in primary total hip and knee arthroplasty: a meta-analysis. *J Orthop Surg Res*. 2018;13(1).
215. Luo W, Sun RX, Jiang H, Ma XL. The efficacy and safety of topical administration of tranexamic acid in spine surgery: a meta-analysis. *J Orthop Surg Res*. 2018;13(1):96.
216. Ma R, Chen GH, Zhao LJ, Zhai XC. Efficacy of naproxen prophylaxis for the prevention of heterotopic ossification after hip surgery: a meta-analysis. *J Orthop Surg Res*. 2018;13(1):48.
217. He H, Wang W, Lyu J, Zheng J, Guo L, An X, et al. Efficacy and tolerability of different doses of three new antidepressants for treating major depressive disorder: A PRISMA-compliant meta-analysis. *J Psychiatr Res*. 2018;96:247-59.
218. Wang KL, Chiu CC, Giugliano RP, Tan DS, Lin CY, Lai EY, et al. Drug Class, Renal Elimination, and Outcomes of Direct Oral Anticoagulants in Asian Patients: A Meta-Analysis. *J Stroke Cerebrovasc Dis : the official journal of National Stroke Association*. 2018;27(4):857-64.
219. Dhana A, Yen H, Okhovat JP, Cho E, Keum N, Khumalo NP. Ivermectin versus permethrin in the treatment of scabies: A systematic review and meta-analysis of randomized controlled trials. *J Am Acad Dermatol*. 2018;78(1):194-98.
220. Karatasakis A, Danek BA, Karacsonyi J, Rangan BV, Roesle MK, Knickelbine T, et al. Effect of PCSK9 Inhibitors on Clinical Outcomes in Patients With Hypercholesterolemia: A Meta-Analysis of 35 Randomized Controlled Trials. *J Am Heart Assoc*. 2017;6(12):e006910.

221. Kuo CM, Tung TH, Wang SH, Chi CC. Efficacy and safety of tofacitinib for moderate-to-severe plaque psoriasis: a systematic review and meta-analysis of randomized controlled trials. *J Eur Acad of Dermatol Venereol*. 2018;32(3):355-62.
222. Liu W, Qian X, Ji W, Lu Y, Wei G, Wang Y. Effects and safety of Sinomenine in treatment of rheumatoid arthritis contrast to methotrexate: a systematic review and Meta-analysis. *J Tradit Chin Med*. 2016;36(5):564-77.
223. Zheng Y, Gu Q, Chen HW, Peng HM, Jia DY, Zhou Y, et al. Efficacy of amiodarone and lidocaine for preventing ventricular fibrillation after aortic cross-clamp release in open heart surgery: a meta-analysis of randomized controlled trials. *J Zhejiang Univ Sci B*. 18(12):1113-22.
224. Fregonese F, Ahuja SD, Akkerman OW, Arakaki-Sanchez D, Ayakaka I, Baghaei P, et al. Comparison of different treatments for isoniazid-resistant tuberculosis: an individual patient data meta-analysis. *Lancet Respir Med*. 2018;6(4):265-75.
225. Bornstein NM, Guekht A, Vester J, Heiss WD, Gusev E, Hömberg V, et al. Safety and efficacy of Cerebrolysin in early post-stroke recovery: a meta-analysis of nine randomized clinical trials. *Neurol Sci*. 2018;39(4):629-40.
226. Chen HJ, Lin C, Lee CH, Chen YH. Efficacy and Safety of Bevacizumab Combined with Mitomycin C or 5-Fluorouracil in Primary Trabeculectomy: A Meta-Analysis of Randomized Clinical Trials. *Ophthalmic Res*. 2018;59(3):155-63.
227. Han C, Kuang MJ, Ma JX, Ma XL. The Efficacy of Preoperative Gabapentin in Spinal Surgery: A Meta-Analysis of Randomized Controlled Trials. *Pain Physician*. 2017;20(7):649-61.
228. Peng K, Zhang J, Meng XW, Liu HY, Ji FH. Optimization of Postoperative Intravenous Patient-Controlled Analgesia with Opioid-Dexmedetomidine Combinations: An Updated Meta-Analysis with Trial Sequential Analysis of Randomized Controlled Trials. *Pain Physician*. 2017;20(7):569-96.
229. Feng M, Ding Q, Zhong C, Li J, Wang Q, Yuan Z, et al. Adjunctive therapy with V-5 Immunitor (V5) for the treatment of tuberculosis patients: a meta-analysis. *Pharmazie*. 2016;71(9):499-503.
230. Xu L, Zhang F, Du S, Yu Q, Chen L, Long LH, et al. Inhaled antibiotics in non-cystic fibrosis bronchiectasis: A meta-analysis. *Pharmazie*. 2016;71(9):491-8.

231. Palmeirim MS, Hürlimann E, Knopp S, Speich B, Belizario V, Joseph SA, et al. Efficacy and safety of co-administered ivermectin plus albendazole for treating soil-transmitted helminths: A systematic review, meta-analysis and individual patient data analysis. *PLoS Negl Trop Dis*. 2018;12(4):e0006458.
232. Furukawa TA, Efthimiou O, Weitz ES, Cipriani A, Keller MB, Kocsis JH, et al. Cognitive-Behavioral Analysis System of Psychotherapy, Drug, or Their Combination for Persistent Depressive Disorder: Personalizing the Treatment Choice Using Individual Participant Data Network Metaregression. *Psychother Psychosom*. 2018;87(3):140-53.
233. Liu X, Zhai T, Ma R, Luo C, Wang H, Liu L. Effects of uric acid-lowering therapy on the progression of chronic kidney disease: a systematic review and meta-analysis. *Ren Fail*. 2018;40(1):289-97.
234. Miravittles M, Urrutia G, Mathioudakis AG, Ancochea J. Efficacy and safety of tiotropium and olodaterol in COPD: a systematic review and meta-analysis. *Respir Res*. 2017;18(1):196.
235. Wang G, Zhang X, Zhang HP, Wang L, Kang Y, Barnes PJ, et al. Corticosteroid plus  $\beta$  2-agonist in a single inhaler as reliever therapy in intermittent and mild asthma: a proof-of-concept systematic review and meta-analysis. *Respir Res*. 2017;18(1):203.
236. Kawalec P, Holko P, Mofáko P, Pilc A. Comparative effectiveness of abatacept, apremilast, secukinumab and ustekinumab treatment of psoriatic arthritis: a systematic review and network meta-analysis. *Rheumatol Int*. 2018;38(2):189-201.
237. Malhotra K, Katsanos AH, Bilal M, Ishfaq MF, Goyal N, Tsivgoulis G. Cerebrovascular Outcomes With Proton Pump Inhibitors and Thienopyridines: A Systematic Review and Meta-Analysis. *Stroke*. 2018;49(2):312-8.
238. Zhang R, Lu Q, Wu Y. The Comparison of Midazolam and Propofol in Gastrointestinal Endoscopy: A Systematic Review and Meta-analysis. *Surg Laparosc Endosc Percutan Tech*. 2018;28(3):153-8.
239. Yamashita Y, Morimoto T, Toyota T, Shiomi H, Makiyama T, Ono K, et al. Asian patients versus non-Asian patients in the efficacy and safety of direct oral anticoagulants relative to vitamin K antagonist for venous thromboembolism: A systemic review and meta-analysis. *Thromb Res*. 2018;166:37-42.

240. Zhang W, Sun H, Atiquzzaman M, Sou J, Anis AH, Cooper C. Influenza vaccination for HIV-positive people: Systematic review and network meta-analysis. *Vaccine*. 2018;36(28):4077-86.
241. Chen H, Shen FE, Tan XD, Jiang WB, Gu YH. Efficacy and Safety of Acupuncture for Essential Hypertension: A Meta-Analysis. *Med Sci Monit*. 2018;24:2946.
242. Arteagoitia I, Andrés CR, Ramos E. Does chlorhexidine reduce bacteremia following tooth extraction? A systematic review and meta-analysis. *PloS one*. 2018;13(4):e0195592.
243. Feng X, Tian M, Zhang W, Mei H. Gastrointestinal safety of etoricoxib in osteoarthritis and rheumatoid arthritis: A meta-analysis. *PloS one*. 2018;13(1).
244. Kawakami H, Mihara T, Nakamura N, Ka K, Goto T. Effect of magnesium added to local anesthetics for caudal anesthesia on postoperative pain in pediatric surgical patients: A systematic review and meta-analysis with Trial Sequential Analysis. *PloS one*. 2018;13(1):e0190798.
245. Li X, Zhu L, Zhou C, Liu J, Du H, Wang C, et al. Efficacy and tolerability of short-term duloxetine treatment in adults with generalized anxiety disorder: A meta-analysis. *PloS one*. 2018;13(3):e0194501.
246. Lin YC, Lin JW, Wu MS, Chen KC, Peng CC, Kang YN. Effects of calcium channel blockers comparing to angiotensin-converting enzyme inhibitors and angiotensin receptor blockers in patients with hypertension and chronic kidney disease stage 3 to 5 and dialysis: A systematic review and meta-analysis. *PloS one*. 2017;12(12):e0188975.
247. Ling X, Zhou H, Ni Y, Wu C, Zhang C, Zhu Z. Does dexmedetomidine have an antiarrhythmic effect on cardiac patients? A meta-analysis of randomized controlled trials. *PloS one*. 2018;13(3):e0193303.
248. Rohner E, Grabik M, Tonia T, Jüni P, Pöyry F, Pignatti F, et al. Does access to clinical study reports from the European Medicines Agency reduce reporting biases? A systematic review and meta-analysis of randomized controlled trials on the effect of erythropoiesis-stimulating agents in cancer patients. *PloS one*. 2017;12(12):e0189309.
249. Sethi NJ, Nielsen EE, Safi S, Feinberg J, Gluud C, Jakobsen JC. Digoxin for atrial fibrillation and atrial flutter: A systematic review with meta-analysis and trial sequential analysis of randomised clinical trials. *PloS one*. 2018;13(3):e0193924.

250. Wolf S, Hoffmann VS, Habicht A, Kauke T, Bucher J, Schoenberg M, et al. Effects of mTOR-Is on malignancy and survival following renal transplantation: A systematic review and meta-analysis of randomized trials with a minimum follow-up of 24 months. *PloS one*. 2018;13(4):e0194975.
